# Supplementary material
Source: PubMed Central journal article supplement (PMC3538845)
Supplement: NIHMS401422-supplement-1.pdf [file NIHMS401422-supplement-1.pdf]

Supplementary Information for:

# The hexahydro-Diels–Alder reaction: triyne to *o*-benzyne to benzenoids

Thomas R. Hoye,\* Beeraiah Baire, Dawen Niu, Patrick H. Willoughby & Brian P. Woods

\*To whom correspondence should be addressed. E-mail: hoye@umn.edu

*Department of Chemistry  
University of Minnesota  
207 Pleasant St. SE  
Minneapolis, MN 55455*

| Contents of Supplementary Information                                                                                                                                            | Page #  |
|----------------------------------------------------------------------------------------------------------------------------------------------------------------------------------|---------|
| <b>I.</b> General Experimental Protocols                                                                                                                                         | 5       |
| General Procedures A and B                                                                                                                                                       | 5       |
| <b>II.</b> Fig. S1. An example of HDDA monitoring by in situ <sup>1</sup> H NMR analysis:<br><b>21</b> to <b>22</b> (Fig. 2B of manuscript) at, e.g., <i>t</i> = 0, 8, and 46 h. | 6       |
| <b>III.</b> Preparation procedures and characterization data<br>for all key compounds                                                                                            | 7 – 43  |
| Synthesis of <b>15</b> (via <b>19</b> , <b>S1</b> , <b>S2</b> , <b>S3</b> , and <b>13</b> )                                                                                      | 7 – 10  |
| Synthesis of <b>22</b> (via <b>19</b> , <b>20</b> , <b>S4</b> , and <b>21</b> )                                                                                                  | 11 – 13 |
| Synthesis of <b>S6</b> (Fig. 3 entry 1, via <b>S4</b> and <b>S5</b> )                                                                                                            | 14 – 15 |
| Synthesis of <b>S10</b> (Fig. 3 entry 2, via <b>S7</b> , <b>S8</b> , and <b>S9</b> )                                                                                             | 16 – 17 |
| Synthesis of <b>S15</b> (Fig. 3 entry 3, via <b>19</b> , <b>S11</b> , <b>S12</b> , <b>S13</b> , and <b>S14</b> )                                                                 | 18 – 20 |
| Synthesis of <b>S17</b> (Fig. 3 entry 4, via <b>S16</b> )                                                                                                                        | 21 – 22 |
| Synthesis of <b>S20</b> (Fig. 3 entry 5, via <b>S7</b> , <b>S18</b> , and <b>S19</b> )                                                                                           | 23 – 24 |
| Synthesis of <b>S22</b> (Fig. 3 entry 6, via <b>S7</b> and <b>S21</b> )                                                                                                          | 25      |
| Synthesis of <b>S24</b> (Fig. 3 entry 7, via <b>S23</b> )                                                                                                                        | 26 – 27 |
| Synthesis of <b>S28</b> (Fig. 3 entry 8, via <b>S25</b> , <b>S26</b> , and <b>S27</b> )                                                                                          | 28 – 30 |
| Synthesis of <b>S32</b> (Fig. 3 entry 9, via <b>S29</b> , <b>S30</b> , and <b>S31</b> )                                                                                          | 31 – 33 |
| Synthesis of <b>S36</b> (Fig. 3 entry 10, via <b>S33</b> , <b>S34</b> , and <b>S35</b> )                                                                                         | 34 – 36 |
| Synthesis of <b>23</b> (via <b>S37</b> and <b>S38</b> )                                                                                                                          | 37 – 38 |
| Synthesis of <b>25a</b>                                                                                                                                                          | 38 – 39 |
| Synthesis of <b>25b</b>                                                                                                                                                          | 39      |
| Synthesis of <b>25c</b> (and regioisomer <b>S39</b> )                                                                                                                            | 39 – 40 |
| Synthesis of <b>25d</b>                                                                                                                                                          | 40      |
| Synthesis of <b>25e</b>                                                                                                                                                          | 40 – 41 |
| Synthesis of <b>25f</b> (and regioisomer <b>S40</b> )                                                                                                                            | 41      |
| Synthesis of <b>26</b> (via <b>S41</b> )                                                                                                                                         | 42      |
| Synthesis of <b>28</b>                                                                                                                                                           | 42 – 43 |
| <b>IV.</b> Computational details for geometry of fluorenonyne <b>24</b>                                                                                                          | 44 – 45 |

|                                                                                      |          |
|--------------------------------------------------------------------------------------|----------|
| V. Computational details for aryne <b>27</b> -comp generation and trapping           | 46 – 59  |
| VI. Copies of $^1\text{H}$ and $^{13}\text{C}$ NMR spectra of each isolated compound | 60 – 169 |
| $^1\text{H}$ NMR spectrum of <b>19</b>                                               | 61       |
| $^{13}\text{C}$ NMR spectrum of <b>19</b>                                            | 62       |
| $^1\text{H}$ NMR spectrum of <b>S1</b>                                               | 63       |
| $^{13}\text{C}$ NMR spectrum of <b>S1</b>                                            | 64       |
| $^1\text{H}$ NMR spectrum of <b>S2</b>                                               | 65       |
| $^{13}\text{C}$ NMR spectrum of <b>S2</b>                                            | 66       |
| $^1\text{H}$ NMR spectrum of <b>S3</b>                                               | 67       |
| $^{13}\text{C}$ NMR spectrum of <b>S3</b>                                            | 68       |
| $^1\text{H}$ NMR spectrum of <b>13</b>                                               | 69       |
| $^{13}\text{C}$ NMR spectrum of <b>13</b>                                            | 70       |
| $^1\text{H}$ NMR spectrum of <b>15</b>                                               | 71       |
| $^{13}\text{C}$ NMR spectrum of <b>15</b>                                            | 72       |
| $^1\text{H}$ NMR spectrum of <b>20</b>                                               | 73       |
| $^{13}\text{C}$ NMR spectrum of <b>20</b>                                            | 74       |
| $^1\text{H}$ NMR spectrum of <b>S4</b>                                               | 75       |
| $^{13}\text{C}$ NMR spectrum of <b>S4</b>                                            | 76       |
| $^1\text{H}$ NMR spectrum of <b>21</b>                                               | 77       |
| $^{13}\text{C}$ NMR spectrum of <b>21</b>                                            | 78       |
| $^1\text{H}$ NMR spectrum of <b>22</b>                                               | 79       |
| $^{13}\text{C}$ NMR spectrum of <b>22</b>                                            | 80       |
| $^1\text{H}$ NMR spectrum of <b>S5</b>                                               | 81       |
| $^{13}\text{C}$ NMR spectrum of <b>S5</b>                                            | 82       |
| $^1\text{H}$ NMR spectrum of <b>S6</b> ( <b>Fig. 3</b> , entry 1 of manuscript)      | 83       |
| $^{13}\text{C}$ NMR spectrum of <b>S6</b> ( <b>Fig. 3</b> , entry 1 of manuscript)   | 84       |
| $^1\text{H}$ NMR spectrum of <b>S7</b>                                               | 85       |
| $^{13}\text{C}$ NMR spectrum of <b>S7</b>                                            | 86       |
| $^1\text{H}$ NMR spectrum of <b>S8</b>                                               | 87       |
| $^{13}\text{C}$ NMR spectrum of <b>S8</b>                                            | 88       |
| $^1\text{H}$ NMR spectrum of <b>S9</b>                                               | 89       |
| $^{13}\text{C}$ NMR spectrum of <b>S9</b>                                            | 90       |
| $^1\text{H}$ NMR spectrum of <b>S10</b> ( <b>Fig. 3</b> , entry 2 of manuscript)     | 91       |
| $^{13}\text{C}$ NMR spectrum of <b>S10</b> ( <b>Fig. 3</b> , entry 2 of manuscript)  | 92       |
| $^1\text{H}$ NMR spectrum of <b>S11</b>                                              | 93       |
| $^{13}\text{C}$ NMR spectrum of <b>S11</b>                                           | 94       |
| $^1\text{H}$ NMR spectrum of <b>S12</b>                                              | 95       |
| $^{13}\text{C}$ NMR spectrum of <b>S12</b>                                           | 96       |
| $^1\text{H}$ NMR spectrum of <b>S13</b>                                              | 97       |
| $^{13}\text{C}$ NMR spectrum of <b>S13</b>                                           | 98       |
| $^1\text{H}$ NMR spectrum of <b>S14</b>                                              | 99       |
| $^{13}\text{C}$ NMR spectrum of <b>S14</b>                                           | 100      |

|                                                                                                                         |     |
|-------------------------------------------------------------------------------------------------------------------------|-----|
| <sup>1</sup> H NMR spectrum of <b>S15</b> ( <b>Fig. 3</b> , entry 3 of manuscript)                                      | 101 |
| <sup>13</sup> C NMR spectrum of <b>S15</b> ( <b>Fig. 3</b> , entry 3 of manuscript)                                     | 102 |
| <sup>1</sup> H NMR spectrum of <b>S16</b>                                                                               | 103 |
| <sup>13</sup> C NMR spectrum of <b>S16</b>                                                                              | 104 |
| <sup>1</sup> H NMR spectrum of <b>S17</b> ( <b>Fig. 3</b> , entry 4 of manuscript)                                      | 105 |
| <sup>13</sup> C NMR spectrum of <b>S17</b> ( <b>Fig. 3</b> , entry 4 of manuscript, CDCl <sub>3</sub> )                 | 106 |
| <sup>13</sup> C NMR spectrum of <b>S17</b> [ <b>Fig. 3</b> , entry 4 of manuscript, (CD <sub>3</sub> ) <sub>2</sub> CO] | 107 |
| <sup>1</sup> H NMR spectrum of <b>S18</b>                                                                               | 108 |
| <sup>13</sup> C NMR spectrum of <b>S18</b>                                                                              | 109 |
| <sup>1</sup> H NMR spectrum of <b>S19</b>                                                                               | 110 |
| <sup>13</sup> C NMR spectrum of <b>S19</b>                                                                              | 111 |
| <sup>1</sup> H NMR spectrum of <b>S20</b> ( <b>Fig. 3</b> , entry 5 of manuscript)                                      | 112 |
| <sup>13</sup> C NMR spectrum of <b>S20</b> ( <b>Fig. 3</b> , entry 5 of manuscript)                                     | 113 |
| <sup>1</sup> H NMR spectrum of <b>S21</b>                                                                               | 114 |
| <sup>13</sup> C NMR spectrum of <b>S21</b>                                                                              | 115 |
| <sup>1</sup> H NMR spectrum of <b>S22</b> ( <b>Fig. 3</b> , entry 6 of manuscript)                                      | 116 |
| <sup>13</sup> C NMR spectrum of <b>S22</b> ( <b>Fig. 3</b> , entry 6 of manuscript)                                     | 117 |
| <sup>1</sup> H NMR spectrum of <b>S23</b>                                                                               | 118 |
| <sup>13</sup> C NMR spectrum of <b>S23</b>                                                                              | 119 |
| <sup>1</sup> H NMR spectrum of <b>S24</b> ( <b>Fig. 3</b> , entry 7 of manuscript)                                      | 120 |
| <sup>13</sup> C NMR spectrum of <b>S24</b> ( <b>Fig. 3</b> , entry 7 of manuscript)                                     | 121 |
| <sup>1</sup> H NMR spectrum of <b>S25</b>                                                                               | 122 |
| <sup>13</sup> C NMR spectrum of <b>S25</b>                                                                              | 123 |
| <sup>1</sup> H NMR spectrum of <b>S26</b>                                                                               | 124 |
| <sup>13</sup> C NMR spectrum of <b>S26</b>                                                                              | 125 |
| <sup>1</sup> H NMR spectrum of <b>S27</b>                                                                               | 126 |
| <sup>13</sup> C NMR spectrum of <b>S27</b>                                                                              | 127 |
| <sup>1</sup> H NMR spectrum of <b>S28</b> ( <b>Fig. 3</b> , entry 8 of manuscript)                                      | 128 |
| <sup>13</sup> C NMR spectrum of <b>S28</b> ( <b>Fig. 3</b> , entry 8 of manuscript)                                     | 129 |
| <sup>1</sup> H NMR spectrum of <b>S29</b>                                                                               | 130 |
| <sup>13</sup> C NMR spectrum of <b>S29</b>                                                                              | 131 |
| <sup>1</sup> H NMR spectrum of <b>S30</b>                                                                               | 132 |
| <sup>13</sup> C NMR spectrum of <b>S30</b>                                                                              | 133 |
| <sup>1</sup> H NMR spectrum of <b>S31</b>                                                                               | 134 |
| <sup>13</sup> C NMR spectrum of <b>S31</b>                                                                              | 135 |
| <sup>1</sup> H NMR spectrum of <b>S32</b> ( <b>Fig. 3</b> , entry 9 of manuscript)                                      | 136 |
| <sup>13</sup> C NMR spectrum of <b>S32</b> ( <b>Fig. 3</b> , entry 9 of manuscript)                                     | 137 |
| <sup>1</sup> H NMR spectrum of <b>S33</b>                                                                               | 138 |
| <sup>13</sup> C NMR spectrum of <b>S33</b>                                                                              | 139 |
| <sup>1</sup> H NMR spectrum of <b>S34</b>                                                                               | 140 |
| <sup>13</sup> C NMR spectrum of <b>S34</b>                                                                              | 141 |
| <sup>1</sup> H NMR spectrum of <b>S35</b>                                                                               | 142 |
| <sup>13</sup> C NMR spectrum of <b>S35</b>                                                                              | 143 |

|                                                                                      |           |
|--------------------------------------------------------------------------------------|-----------|
| <sup>1</sup> H NMR spectrum of <b>S36</b> ( <b>Fig. 3</b> , entry 10 of manuscript)  | 144       |
| <sup>13</sup> C NMR spectrum of <b>S36</b> ( <b>Fig. 3</b> , entry 10 of manuscript) | 145       |
| <sup>1</sup> H NMR spectrum of <b>S37</b>                                            | 146       |
| <sup>13</sup> C NMR spectrum of <b>S37</b>                                           | 147       |
| <sup>1</sup> H NMR spectrum of <b>S38</b>                                            | 148       |
| <sup>13</sup> C NMR spectrum of <b>S38</b>                                           | 149       |
| <sup>1</sup> H NMR spectrum of <b>23</b>                                             | 150       |
| <sup>13</sup> C NMR spectrum of <b>23</b>                                            | 151       |
| <sup>1</sup> H NMR spectrum of <b>25a</b>                                            | 152       |
| <sup>13</sup> C NMR spectrum of <b>25a</b>                                           | 153       |
| <sup>1</sup> H NMR spectrum of <b>25b</b>                                            | 154       |
| <sup>13</sup> C NMR spectrum of <b>25b</b>                                           | 155       |
| <sup>1</sup> H NMR spectrum of <b>25c</b> (and <b>S39</b> )                          | 156       |
| <sup>13</sup> C NMR spectrum of <b>25c</b> (and <b>S39</b> )                         | 157       |
| <sup>1</sup> H NMR spectrum of <b>25d</b>                                            | 158       |
| <sup>13</sup> C NMR spectrum of <b>25d</b>                                           | 159       |
| <sup>1</sup> H NMR spectrum of <b>25e</b>                                            | 160       |
| <sup>13</sup> C NMR spectrum of <b>25e</b>                                           | 161       |
| <sup>1</sup> H NMR spectrum of <b>25f</b> (and <b>S40</b> )                          | 162       |
| <sup>13</sup> C NMR spectrum of <b>25f</b> (and <b>S40</b> )                         | 163       |
| <sup>1</sup> H NMR spectrum of <b>S41</b>                                            | 164       |
| <sup>13</sup> C NMR spectrum of <b>S41</b>                                           | 165       |
| <sup>1</sup> H NMR spectrum of <b>26</b>                                             | 166       |
| <sup>13</sup> C NMR spectrum of <b>26</b>                                            | 167       |
| <sup>1</sup> H NMR spectrum of <b>28</b>                                             | 168       |
| <sup>13</sup> C NMR spectrum of <b>28</b>                                            | 169       |
| <b>VI. References for the Supplementary Information</b>                              | 170 – 171 |

## General Experimental Protocols

$^1\text{H}$  and  $^{13}\text{C}$  NMR spectra were recorded on Varian Inova 500 (500 MHz), Varian Inova 300 (300 MHz), Varian VXR 300 (300 MHz), and Bruker Avance 500 (500 MHz) spectrometers.  $^1\text{H}$  NMR chemical shifts in  $\text{CDCl}_3$  are referenced to TMS ( $\delta$  0.00 ppm). Non-first order multiplets are identified as "nfom".  $^{13}\text{C}$  NMR chemical shifts in  $\text{CDCl}_3$  are referenced to chloroform ( $\delta$  77.16 ppm). A spurious spike at *ca.* 5 ppm is sometimes present in the copies of the  $^1\text{H}$  NMR spectra that were processed using iNMR software. TMS is present in some  $^{13}\text{C}$  NMR samples ( $\delta$  *ca.* 0.0 ppm). The following format is used to report resonances: chemical shift in ppm [multiplicity, coupling constant(s) in Hz, integral, and assignment].  $^1\text{H}$  NMR assignments are indicated by structure environment, e.g.,  $\text{CH}_a\text{H}_b$ . Some complex structures are numbered in order to simplify proton assignment numbering and naming. Coupling constant analysis was guided by methods we have described elsewhere.<sup>1,2</sup>

Infrared spectra were recorded on a Midac Corporation Prospect 4000 FT-IR spectrometer. The most intense and/or diagnostic peaks are reported, and all spectra were collected in attenuated total reflectance (ATR) mode as thin films on a germanium window.

High-resolution mass spectrometry (HRMS) measurements were made on one of two instruments. Chemical ionization mass spectrometry was performed on a Finnigan MAT 95 (CIMS) mass spectrometer. Samples were introduced via capillary gas chromatography using an oven temperature profile of 25- 320 °C ramped at 50 °C/min. Electrospray ionization (ESI) mass spectrometry was performed on a Bruker BioTOF II (ESI-TOF) instrument using PEG or PPG as an internal standard/calibrant. Samples were introduced as solutions in methanol or acetonitrile.

MPLC refers to medium pressure liquid chromatography (25-200 psi) using hand-packed columns of Silasorb silica gel (18-32  $\mu\text{m}$ , 60 Å pore size), a Waters HPLC pump, a Waters R401 differential refractive index detector, and a Gilson 116 UV detector. Flash chromatography was performed using E. Merck silica gel (230-400 mesh). Thin layer chromatography was performed on glass or plastic backed plates of silica gel and visualized by UV detection and/or a solution of ceric ammonium molybdate, anisaldehyde, potassium permanganate, or phosphomolybdic acid.

Reactions requiring anhydrous conditions were performed under an atmosphere of nitrogen or argon in flame or oven dried glassware. Piperidine, diisopropylamine and triethylamine for cross-coupling reactions were deaerated by a freeze-pump-thaw cycle and then stored in a Schlenk flask or by direct purging with  $\text{N}_2$  gas immediately prior to use. Anhydrous THF, diethyl ether, toluene, and methylene chloride were taken immediately prior to use after being passed through a column of activated alumina. Reported (external) reaction temperatures are the temperature of the heating bath. HDDA reactions, including those that were carried out at temperatures above the boiling point of the solvent, were typically performed in a screw-capped vial or culture tube fitted with an inert, Teflon<sup>®</sup>-lined cap. Those carried out in deuterated solvents were often performed directly in a capped 5 mm NMR sample tube.

### A. General Procedure A: Alkyne Bromination

Powdered  $\text{AgNO}_3$  (0.1 equiv) was added to a stirred solution of alkyne (1.0 equiv) and *N*-bromosuccinimide (NBS, 1.1 equiv) in acetone (0.1 M) at rt. After 1 h the slurry was either i) filtered through Celite<sup>®</sup> (acetone eluent) and concentrated or ii) partitioned between  $\text{Et}_2\text{O}$  and water, further extracted with  $\text{Et}_2\text{O}$ , washed with brine, dried ( $\text{MgSO}_4$ ), and concentrated. The crude material was typically purified by flash chromatography.

### B. General Procedure B: Cadiot–Chodkiewicz Alkyne Cross-Coupling

$\text{CuCl}$  (0.05 equiv) was added to a stirred solution of alkyne (partner A, 1.0 equiv) and 1-bromoalkyne (partner B, 1.5 equiv) in freshly deaerated piperidine (0.3 M) at 0 °C and under an inert atmosphere. After 1 h the reaction mixture was diluted with satd. aq.  $\text{NH}_4\text{Cl}$  and extracted with  $\text{EtOAc}$  or  $\text{Et}_2\text{O}$ . The combined organic extracts were washed with brine, dried ( $\text{MgSO}_4$ ), and concentrated. The crude material was typically purified by flash chromatography.

**Fig. S1** An example of HDDA reaction monitoring by in situ  $^1\text{H}$  NMR analysis: **21** to **22** (cf. Fig. 2B of manuscript) at  $t = 0, 8,$  and  $46$  h.

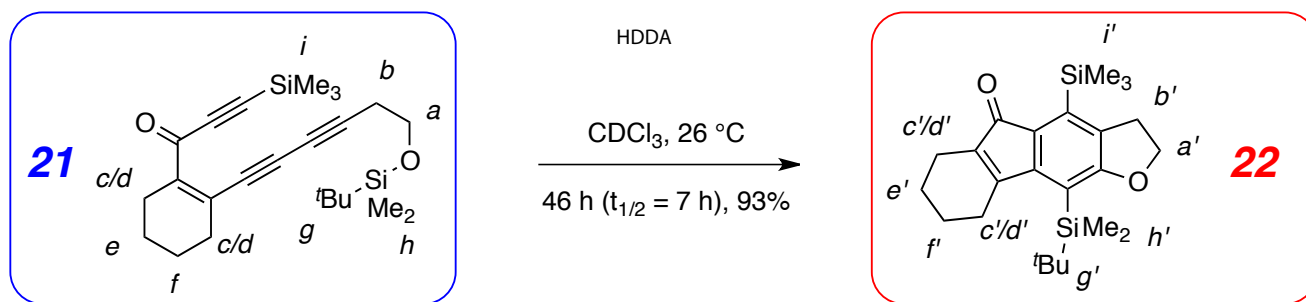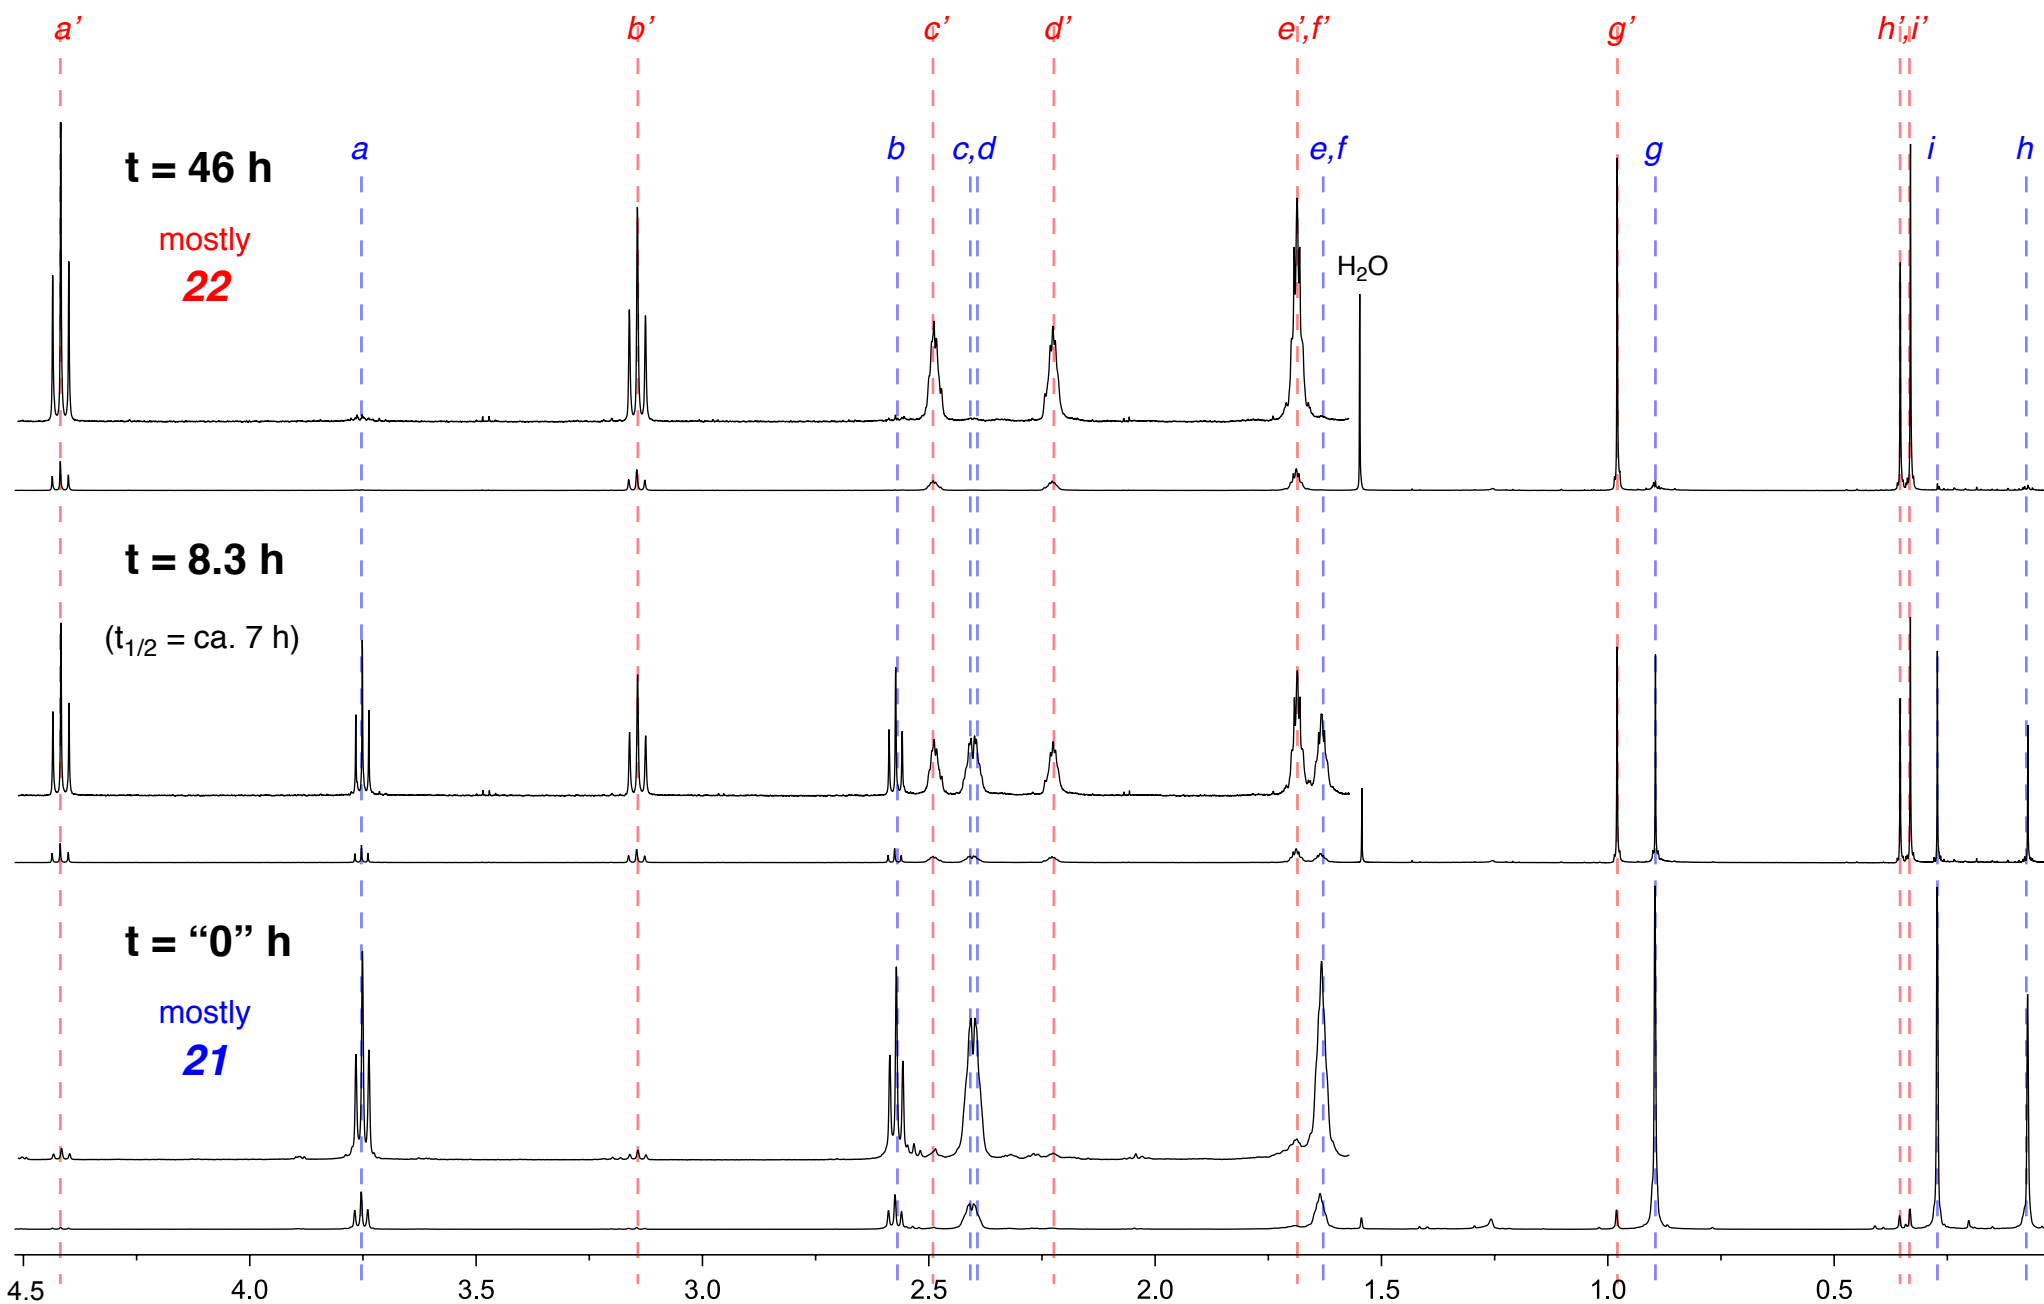

### Synthesis of indenone **15** (Fig. 2A of manuscript)

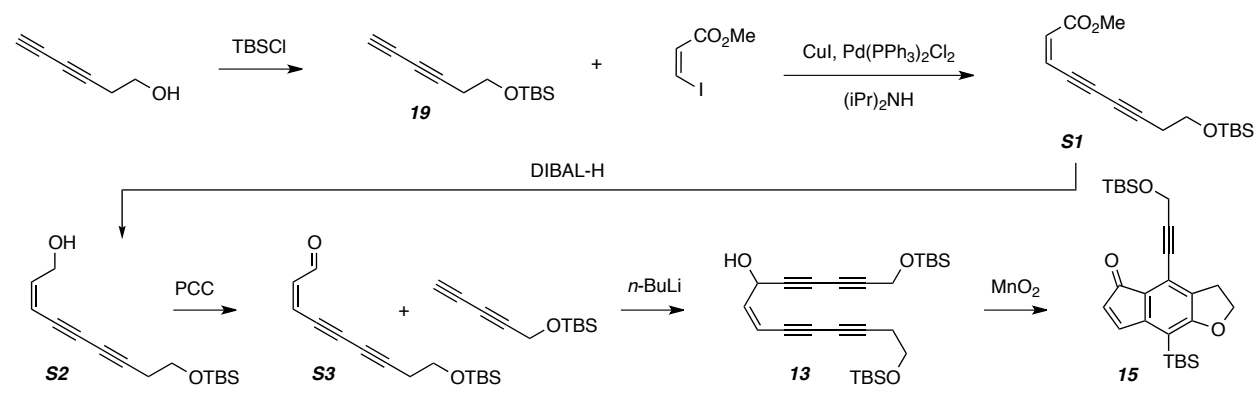

### *tert*-Butyl(hexa-3,5-diyne-1-yloxy)dimethylsilane (**19**)

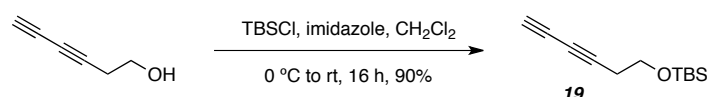

TBSCl (2.19 g, 14.6 mmol) was added to a stirred solution of hexa-3,5-diyne-1-ol<sup>3</sup> (665 mg, 7.1 mmol) and imidazole (1.20 g, 17.6 mmol) in CH<sub>2</sub>Cl<sub>2</sub> (45 mL) at 0 °C. After 15 minutes the ice bath was removed and the reaction mixture was allowed to warm to room temperature. After 12 h the reaction mixture was filtered through a plug of silica gel (EtOAc eluent) and concentrated. Purification by flash chromatography (hexanes:EtOAc 15:1) gave the diyne **19** (1.33 g, 6.4 mmol, 90%) as a clear colorless oil.

<sup>1</sup>H NMR (500 MHz, CDCl<sub>3</sub>): δ 3.75 (t, *J* = 6.9 Hz, 2H, SiOCH<sub>2</sub>), 2.47 (dt, *J* = 1.2, 6.9 Hz, 2H, ≡CCH<sub>2</sub>), 1.97 (t, *J* = 1.2 Hz, 1H, ≡CH), 0.90 [s, 9H, C(CH<sub>3</sub>)<sub>3</sub>], and 0.08 [s, 6H, Si(CH<sub>3</sub>)<sub>2</sub>].

<sup>13</sup>C NMR (125 MHz, CDCl<sub>3</sub>): δ 75.6, 68.5, 65.9, 64.9, 61.3, 26.0, 23.6, 18.4, and -5.2.

IR (neat): 3308, 2956, 2931, 2859, 2228, 1471, 1256, 1108, 839, and 779 cm<sup>-1</sup>.

HRMS (CIMS): Calcd for C<sub>12</sub>H<sub>21</sub>OSi<sup>+</sup> [M+H<sup>+</sup>] requires 209.1356; found 209.1372.

TLC: R<sub>f</sub> 0.6 (9:1 Hex/EtOAc).

### (*Z*)-Methyl 9-((*tert*-Butyldimethylsilyl)oxy)nona-2-en-4,6-diyenoate (**S1**)

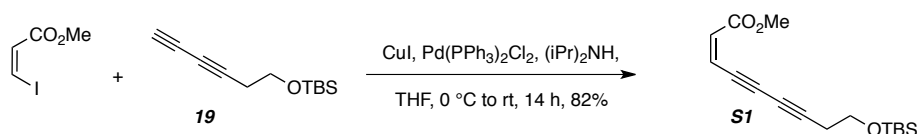

CuI (25 mg, 0.13 mmol) and Pd(PPh<sub>3</sub>)<sub>2</sub>Cl<sub>2</sub> (7 mg, 0.01 mmol) were added to a stirred solution of (*Z*)-methyl 3-iodoacrylate<sup>4</sup> (220 mg, 1.04 mmol), diyne **19** (180 mg, 0.87 mmol), and freshly deaerated diisopropylamine (3.0 mL, 21 mmol) and THF (5 mL) at 0 °C under N<sub>2</sub> atmosphere. After 1 h the ice-bath was removed and the reaction mixture was allowed to warm to rt. After 14 h the reaction mixture was diluted in Et<sub>2</sub>O and washed with satd. aq. NH<sub>4</sub>Cl. The aqueous phase was extracted with Et<sub>2</sub>O and the combined organic extracts were washed with brine, dried (MgSO<sub>4</sub>), and concentrated. Purification by flash chromatography (hexanes:EtOAc 9:1) gave the diyne **S1** (207 mg, 0.71 mmol, 82%) as a pale yellow oil.

**<sup>1</sup>H NMR** (500 MHz, CDCl<sub>3</sub>): δ 6.22 (d, *J* = 11.4 Hz, 1H, *H*<sub>2</sub>), 6.16 (dt, *J* = 11.4, 1.1 Hz, 1H, *H*<sub>3</sub>), 3.78 (s, 3H, OCH<sub>3</sub>), 3.77 (t, *J* = 7.0 Hz, 2H, CH<sub>2</sub>O), 2.58 (dt, *J* = 1.1, 7.0 Hz, 2H, ≡CCH<sub>2</sub>), 0.90 [s, 9H, C(CH<sub>3</sub>)<sub>3</sub>], and 0.08 [s, 6H, Si(CH<sub>3</sub>)<sub>2</sub>].

**<sup>13</sup>C NMR** (125 MHz, CDCl<sub>3</sub>): δ 164.9, 131.1, 122.4, 87.0, 86.4, 71.2, 66.2, 61.3, 51.8, 26.0, 24.4, 18.4, and -5.2.

**IR** (neat): 2931, 2857, 2231, 1727, 1607, 1438, 1256, 1212, 1171, 1105, 909, 839, and 778 cm<sup>-1</sup>.

**HRMS** (ESI-TOF): Calcd for C<sub>16</sub>H<sub>24</sub>NaO<sub>3</sub>Si<sup>+</sup> [M+Na<sup>+</sup>] requires 315.1387; found 315.1388.

**TLC**: R<sub>f</sub> 0.5 (9:1 Hex/EtOAc).

### (*Z*)-9-((*tert*-Butyldimethylsilyl)oxy)nona-2-en-4,6-diyn-1-ol (**S2**)

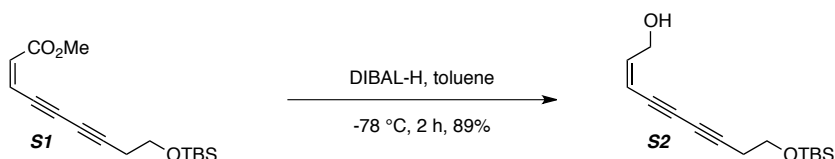

DIBAL-H (1.3 mL, 1.5 M in toluene, 2.0 mmol) was added to a stirred solution of ester **S1** (180 mg, 0.62 mmol) in toluene (3 mL) at -78 °C. After 2 h the reaction mixture was diluted with ether and washed with satd. aq. NH<sub>4</sub>Cl. The aqueous phase was extracted with Et<sub>2</sub>O and the combined organic extracts were washed with brine, dried (MgSO<sub>4</sub>), and concentrated. Purification by flash chromatography (hexanes:EtOAc 3:1) gave the allylic alcohol **S2** (145 mg, 0.55 mmol, 89%) as a pale yellow oil.

**<sup>1</sup>H NMR** (500 MHz, CDCl<sub>3</sub>): δ 6.22 (dt, *J* = 11.0, 6.4 Hz, 1H, *H*<sub>2</sub>), 5.60 (dtt, *J* = 11.0, 1.4, 1.4 Hz, 1H, *H*<sub>3</sub>), 4.42 (br d, *J* = 6.0 Hz, 2H, CH<sub>2</sub>OH), 3.76 (t, *J* = 7.0 Hz, 2H, CH<sub>2</sub>OSi), 2.55 (dt, *J* = 1.2, 7.0 Hz, 2H, ≡CCH<sub>2</sub>), 1.84 (br s, 1H, OH), 0.90 [s, 9H, C(CH<sub>3</sub>)<sub>3</sub>], and 0.08 [s, 6H, Si(CH<sub>3</sub>)<sub>2</sub>].

**<sup>13</sup>C NMR** (125 MHz, CDCl<sub>3</sub>): δ 145.2, 109.7, 83.1, 80.0, 70.8, 66.0, 61.5, 61.2, 26.0, 24.1, 18.4, and -5.2.

**IR** (neat): 3362, 2953, 2930, 2858, 2236, 1470, 1255, 1106, 1028, 909, 839, and 779 cm<sup>-1</sup>.

**HRMS** (ESI-TOF): Calcd for C<sub>15</sub>H<sub>24</sub>NaO<sub>2</sub>Si<sup>+</sup> [M+Na<sup>+</sup>] requires 287.1438; found 287.1463.

**TLC**: R<sub>f</sub> 0.4 (3:1 Hex/EtOAc).

### (*Z*)-9-((*tert*-Butyldimethylsilyl)oxy)nona-2-en-4,6-diynal (**S3**)

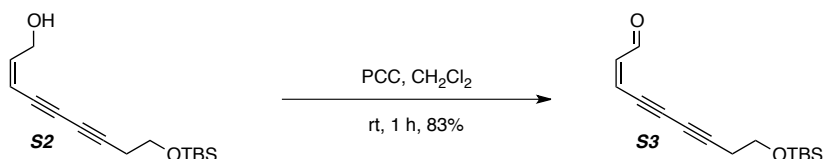

PCC (130 mg, 0.60 mmol) was added to a stirred solution of endiynol **S2** (80 mg, 0.30 mmol) in CH<sub>2</sub>Cl<sub>2</sub> (2 mL) at room temperature. After 1 h the reaction mixture was filtered through a plug of silica gel (CH<sub>2</sub>Cl<sub>2</sub> eluent) and concentrated. Purification by flash chromatography (hexanes:EtOAc 9:1) gave aldehyde **S3** (66 mg, 0.25 mmol, 83%) as a clear yellow oil.

**<sup>1</sup>H NMR** (300 MHz, CDCl<sub>3</sub>): δ 10.1 (d, *J* = 8.2 Hz, 1H, CHO), 6.65 (dt, *J* = 10.8, 1.2 Hz, 1H, *H*<sub>3</sub>), 6.40 (dd, *J* = 8.2, 10.9 Hz, 1H, *H*<sub>2</sub>), 3.79 (t, *J* = 6.8 Hz, 2H, CH<sub>2</sub>O), 2.60 (dt, *J* = 1.2, 6.6 Hz, 2H, ≡CCH<sub>2</sub>), 0.91 [s, 9H, C(CH<sub>3</sub>)<sub>3</sub>], and 0.09 [s, 6H, Si(CH<sub>3</sub>)<sub>2</sub>].

**<sup>13</sup>C NMR** (75 MHz, CDCl<sub>3</sub>): δ 191.5, 140.9, 127.9, 87.6, 69.3, 65.7, 61.2, 60.8, 26.0, 24.3, 18.5, and -5.2.



**IR** (neat): 2953, 2930, 2857, 2360, 2231, 1683, 1469, 1255, 1108, 909, 839, and 779  $\text{cm}^{-1}$ .

**HRMS** (ESI-TOF): Calcd for  $\text{C}_{15}\text{H}_{22}\text{NaO}_2\text{Si}^+$  [ $\text{M}+\text{Na}^+$ ] requires 285.1281; found 285.1297.

**TLC**:  $R_f$  0.5 (9:1 Hex/EtOAc).

**(Z)-2,2,3,3,20,20,21,21-Octamethyl-4,19-dioxa-3,20-disiladocosa-11-en-6,8,13,15-tetrayn-10-ol (13)**

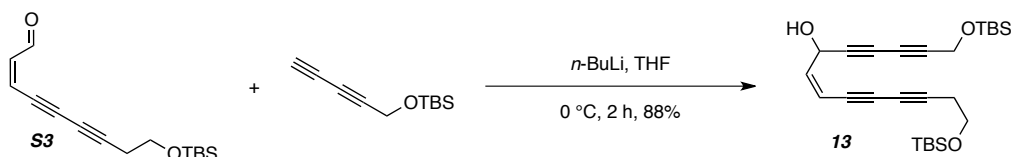

*n*-BuLi (0.24 mL, 2.5 M in hexanes, 0.60 mmol) was added to a stirred solution of *tert*-butyldimethyl(penta-2,4-diyn-1-yloxy)silane<sup>5</sup> (118 mg, 0.61 mmol) in THF (2 mL) under  $\text{N}_2$  and at 0  $^\circ\text{C}$ . After 1 h a solution of aldehyde **3** (78 mg, 0.30 mmol) in THF (3 mL) was added dropwise. After 1 h satd. aq.  $\text{NH}_4\text{Cl}$  was added and the mixture was extracted with  $\text{Et}_2\text{O}$ . The combined organic extracts were washed with brine, dried ( $\text{MgSO}_4$ ), and concentrated. Purification by flash chromatography (hexanes:EtOAc 6:1) gave the propargylic alcohol **13** (120 mg, 0.26 mmol, 88%) as a clear yellow oil.

**$^1\text{H}$  NMR** (300 MHz,  $\text{CDCl}_3$ ):  $\delta$  6.65 (dd,  $J$  = 8.8, 10.6 Hz, 1H, =C(*H*)CHOH), 5.67 (dddd,  $J$  = 1.0, 1.0, 1.0, 10.6 Hz, 1H, =C(*H*)C $\equiv$ ), 5.44 (br dd,  $J$  = 3.3, 8.7 Hz, 1H, CHOH), 4.38 (br s, 2H, =CCH<sub>2</sub>OSi), 3.77 (t,  $J$  = 7.0 Hz, 2H, CH<sub>2</sub>CH<sub>2</sub>OSi), 2.56 (dt,  $J$  = 1.1, 7.0 Hz, 2H, =CCH<sub>2</sub>), 2.13 (br d,  $J$  = 4.5 Hz, OH), 0.90 [s, 18H, C(CH<sub>3</sub>)<sub>3</sub>], 0.12 [s, 6H, Si(CH<sub>3</sub>)<sub>2</sub>], and 0.08 [s, 6H, Si(CH<sub>3</sub>)<sub>2</sub>].

**$^{13}\text{C}$  NMR** (125 MHz,  $\text{CDCl}_3$ ):  $\delta$  142.4, 111.5, 84.0, 81.3, 79.3, 70.3, 69.8, 68.8, 66.0, 65.9, 61.4, 60.8, 52.2, 26.0, 25.9, 24.2, 18.5, 18.4, -5.1, and -5.2.

**IR** (neat): 3402, 2954, 2930, 2857, 2236, 1468, 1364, 1256, 1093, 838, and 780  $\text{cm}^{-1}$ .

**HRMS** (ESI-TOF): Calcd for  $\text{C}_{26}\text{H}_{41}\text{O}_3\text{Si}_2^+$  [ $\text{M}+\text{H}^+$ ] requires 455.2589; found 455.2570.

**TLC**:  $R_f$  0.4 (6:1 Hex/EtOAc).

**8-(*tert*-Butyldimethylsilyl)-4-(3-((*tert*-butyldimethylsilyl)oxy)prop-1-yn-1-yl)-2*H*-indeno[5,6-*b*]furan-5(3*H*)-one (15)**

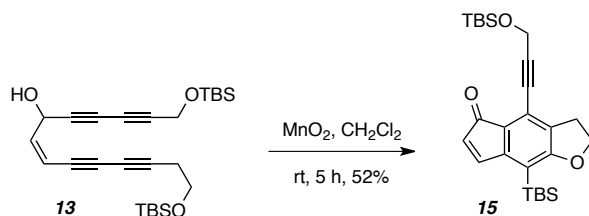

$\text{MnO}_2$  (195 mg, 2.2 mmol) was added to a solution of alcohol **13** (40 mg, 0.088 mmol) in  $\text{CH}_2\text{Cl}_2$  (1 mL) and this black heterogeneous mixture was vigorously stirred at room temperature. After 5 h the reaction mixture was filtered through a plug of silica gel ( $\text{CH}_2\text{Cl}_2$  eluent). Purification by flash chromatography (hexanes:EtOAc 9:1) gave the tricyclic indenone **15** (21 mg, 0.046 mmol, 52%) as a golden yellow oil.

**$^1\text{H}$  NMR** (500 MHz,  $\text{CDCl}_3$ ):  $\delta$  7.49 (d,  $J$  = 6.1 Hz, 1H, *H*3), 5.83 (d,  $J$  = 6.1 Hz, 1H, *H*2), 4.64 (s, 2H, CH<sub>2</sub>OSi), 4.58 (t,  $J$  = 9.0 Hz, 2H, ArOCH<sub>2</sub>), 3.17 (t,  $J$  = 9.0 Hz, 2H, ArCH<sub>2</sub>), 0.94 [s, 9H, C(CH<sub>3</sub>)<sub>3</sub>], 0.90 [s, 9H, C(CH<sub>3</sub>)<sub>3</sub>], 0.36 [s, 6H, C<sub>Ar</sub>Si(CH<sub>3</sub>)<sub>2</sub>], and 0.19 [s, 6H, CH<sub>2</sub>Si(CH<sub>3</sub>)<sub>2</sub>].

**$^{13}\text{C}$  NMR** (125 MHz,  $\text{CDCl}_3$ ):  $\delta$  195.7, 169.5, 154.2, 148.0, 127.5, 122.4, 117.6, 116.4, 97.0, 80.4, 79.5, 71.6, 52.6, 28.7, 26.6, 26.0, 18.5, 17.9, -2.3, and -4.9.

**IR** (neat): 2954, 2927, 2855, 1704, 1595, 1534, 1461, 1384, 1326, 1252, 1121, 1085, 836, and 780  $\text{cm}^{-1}$ .

**HRMS** (ESI-TOF): Calcd for  $\text{C}_{26}\text{H}_{39}\text{O}_3\text{Si}_2^+$  [ $\text{M}+\text{H}^+$ ] requires 455.2432; found 455.2463.

**TLC**:  $R_f$  0.4 (19:1 Hex/EtOAc).

### Synthesis of indenone **22** (Figure 2B of manuscript)

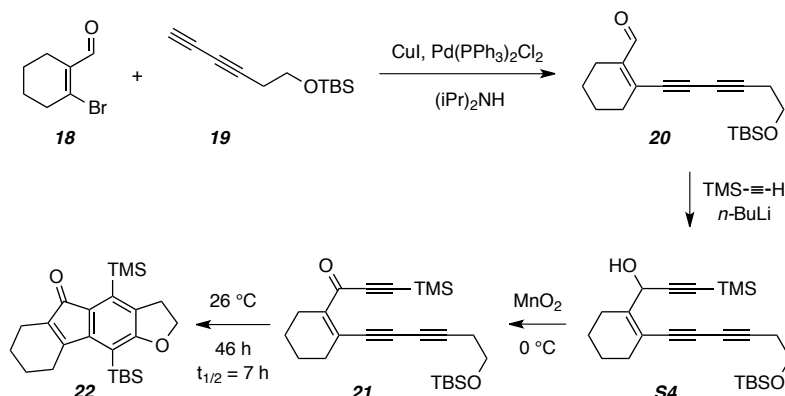

### 2-(6-((*tert*-Butyldimethylsilyl)oxy)hexa-1,3-diyne-1-yl)cyclohex-1-enecarboxaldehyde (**20**)

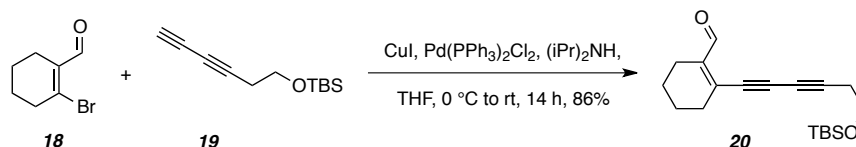

CuI (29 mg, 0.15 mmol) and Pd(PPh<sub>3</sub>)<sub>2</sub>Cl<sub>2</sub> (7 mg, 0.01 mmol) were added to a stirred solution of 2-bromo-1-cyclohexene-1-carboxaldehyde<sup>6</sup> (**18**, 188 mg, 0.99 mmol), diyne **19** (250 mg, 1.20 mmol), and freshly deaerated diisopropylamine (3.0 mL, 21 mmol) in THF (5 mL) at 0 °C and under an atmosphere of N<sub>2</sub>. After 1 h the ice-bath was removed and the reaction mixture was allowed to warm to rt. After 14 h the reaction mixture was diluted in Et<sub>2</sub>O and washed with satd. aq. NH<sub>4</sub>Cl. The aqueous phase was extracted with Et<sub>2</sub>O and the combined organic extracts were washed with brine, dried (MgSO<sub>4</sub>), and concentrated. Purification by MPLC (hexanes:EtOAc 15:1) gave the diyne **20** (269 mg, 0.85 mmol, 86%) as a clear brown oil.

<sup>1</sup>H NMR (500 MHz, CDCl<sub>3</sub>): δ 10.11 (s, 1H, CHO), 3.78 (t, *J* = 6.9 Hz, 2H, OSiCH<sub>2</sub>), 2.58 (t, *J* = 6.9 Hz, 1H, ≡CCH<sub>2</sub>), 2.40 (nfom, 2H, =C-CH<sub>2</sub>), 2.27 (nfom, 2H, =C-CH<sub>2</sub>), 1.65 [nfom, 4H, CH<sub>2</sub>(CH<sub>2</sub>)<sub>2</sub>CH<sub>2</sub>], 0.90 [s, 9H, C(CH<sub>3</sub>)<sub>3</sub>], and 0.08 [s, 6H, Si(CH<sub>3</sub>)<sub>2</sub>].

<sup>13</sup>C NMR (125 MHz, CDCl<sub>3</sub>): δ 192.3, 146.3, 138.8, 85.7, 83.5, 71.7, 65.9, 61.3, 32.2, 26.0, 24.3, 22.4, 21.9, 21.0, 18.5, and -5.2.

IR (neat): 2933, 2858, 2232, 1677, 1255, 1220, 1108, 839, and 779 cm<sup>-1</sup>.

HRMS (ESI-TOF): Calcd for C<sub>19</sub>H<sub>28</sub>NaO<sub>2</sub>Si<sup>+</sup> [M+Na<sup>+</sup>] requires 339.1751; found 339.1774.

TLC: R<sub>f</sub> 0.4 (9:1 Hex/EtOAc).

### 1-(2-(6-((*tert*-Butyldimethylsilyl)oxy)hexa-1,3-diyne-1-yl)cyclohex-1-en-1-yl)-3-(trimethylsilyl)prop-2-yn-1-ol (**S4**)

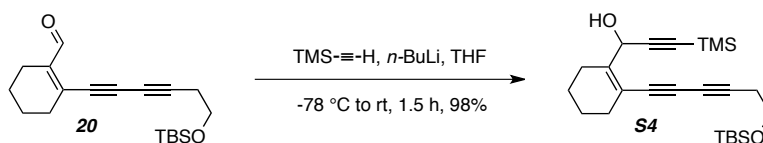

*n*-BuLi (800  $\mu$ L, 2.5 M in hexanes, 2.0 mmol) was added to a stirred solution of ethynyltrimethylsilane (350  $\mu$ L, 2.5 mmol) in THF (2.3 mL) at  $-78$   $^{\circ}$ C. After 1 h a solution of diyne **20** (399 mg, 1.26 mmol) in THF (1.7 mL) was added and the reaction mixture was allowed to warm to rt. After 30 min satd. aq.  $\text{NH}_4\text{Cl}$  was added and the mixture was extracted with EtOAc. The combined organic extracts were washed with brine, dried ( $\text{MgSO}_4$ ), and concentrated. The crude product triynol **S4** (508 mg, 1.23 mmol, 98%) was a clear red oil and used directly in the next reaction.

**$^1\text{H}$  NMR** (500 MHz,  $\text{CDCl}_3$ ):  $\delta$  5.58 (d,  $J = 4.2$  Hz, 1H,  $\text{CHOH}$ ), 3.76 (t,  $J = 7.1$  Hz, 2H,  $\text{SiOCH}_2$ ), 2.55 (t,  $J = 7.1$  Hz, 2H,  $\equiv\text{CCH}_2$ ), 2.33 (nfom, 2H,  $=\text{C}-\text{CH}_2$ ), 2.19 (nfom, 2H,  $=\text{C}-\text{CH}_2$ ), 1.94 (d,  $J = 4.5$  Hz, 1H,  $\text{OH}$ ), 1.64 (nfom, 4H,  $\text{CH}_2(\text{CH}_2)_2\text{CH}_2$ ), 0.90 [s, 9H,  $\text{Si}(\text{CH}_3)_3$ ], 0.18 [s, 9H,  $\text{Si}(\text{CH}_3)_3$ ], and 0.08 [s, 6H,  $\text{Si}(\text{CH}_3)_2\text{C}$ ].

**$^{13}\text{C}$  NMR** (125 MHz,  $\text{CDCl}_3$ ):  $\delta$  146.6, 117.9, 104.1, 90.7, 82.5, 78.3, 73.7, 66.3, 64.7, 61.6, 30.0, 26.0, 24.2, 23.7, 22.2, 21.9, 18.5, 0.0, and  $-5.2$ .

**IR** (neat): 3409, 2933, 2859, 2171, 1251, 1106, 842, and  $778$   $\text{cm}^{-1}$ .

**HRMS** (ESI-TOF): Calcd for  $\text{C}_{24}\text{H}_{38}\text{NaO}_2\text{Si}_2^+$  [ $\text{M}+\text{Na}^+$ ] requires 437.2303; found: 437.2306.

**TLC**:  $R_f$  0.3 (9:1 Hex/EtOAc).

### 1-(2-(6-((*tert*-Butyldimethylsilyloxy)hexa-1,3-diyn-1-yl)cyclohex-1-en-1-yl)-3-(trimethylsilyl)prop-2-yn-1-one (**21**))

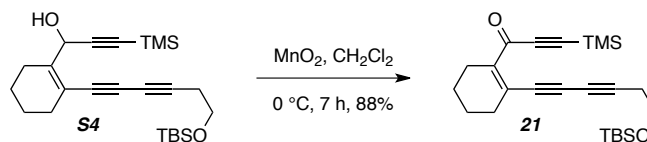

$\text{MnO}_2$  (267 mg, 3.07 mmol) was added in two portions to a stirred solution of alcohol **S4** (41 mg, 0.099 mmol) in  $\text{CH}_2\text{Cl}_2$  (0.5 mL) at  $0$   $^{\circ}$ C. After 7 h the reaction mixture was filtered through Celite<sup>®</sup> ( $\text{Et}_2\text{O}$  eluent) and concentrated at  $0$   $^{\circ}$ C to give ketone **21** (36 mg, 0.087 mmol, 88%) as a clear amber oil. Because of the high reactivity of this ketone (toward conversion to **22**) at ambient temperature this sample was characterized without further purification.

**$^1\text{H}$  NMR** (500 MHz,  $\text{CDCl}_3$ ):  $\delta$  3.75 (t,  $J = 7.2$  Hz, 2H,  $\text{SiOCH}_2$ ), 2.57 (t,  $J = 7.2$  Hz, 2H,  $\equiv\text{CCH}_2$ ), 2.37-2.44 (m, 4H,  $=\text{C}-\text{CH}_2$ ), 1.61-1.66 (m, 4H,  $\text{CH}_2(\text{CH}_2)_2\text{CH}_2$ ), 0.90 [s, 9H,  $\text{Si}(\text{CH}_3)_3$ ], 0.27 [s, 9H,  $\text{Si}(\text{CH}_3)_3$ ], and 0.07 [s, 6H,  $\text{Si}(\text{CH}_3)_2\text{C}$ ].

**$^{13}\text{C}$  NMR** (125 MHz,  $\text{CDCl}_3$ ):  $\delta$  177.4, 144.4, 131.4, 102.4, 101.4, 85.8, 85.3, 74.3, 67.1, 61.5, 33.4, 26.0, 25.6, 24.3, 21.9, 21.6, 18.4,  $-0.4$ , and  $-5.2$ .

**IR** (neat): 2953, 2933, 2859, 2228, 2151, 1612, 1250, 1106, and  $844$   $\text{cm}^{-1}$ .

**HRMS** (ESI-TOF): Calcd for  $\text{C}_{24}\text{H}_{36}\text{NaO}_2\text{Si}_2^+$  [ $\text{M}+\text{Na}^+$ ] requires 435.2146; found 435.2154.

**TLC**:  $R_f$  0.4 (9:1 Hex/EtOAc).

### 10-(*tert*-Butyldimethylsilyl)-4-(trimethylsilyl)-6,7,8,9-tetrahydro-2*H*-fluoreno[3,2-*b*]furan-5(3*H*)-one (**22**)

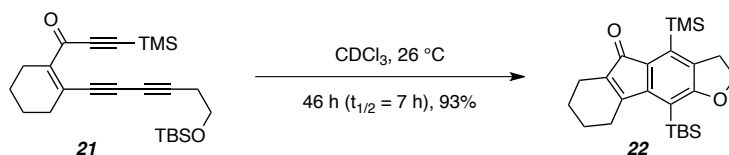

A solution of ketone **21** (29 mg, 0.070 mmol) in CDCl<sub>3</sub> (2 mL) was kept at 26 °C (external bath temperature). After 46 h the reaction mixture was concentrated and purified by flash chromatography (hexanes:EtOAc 15:1) to give the benzenoid **22** (27 mg, 0.066 mmol, 93%) as a clear amber oil. Reaction progress was monitored by <sup>1</sup>H NMR spectroscopy, and the spectral data for a series of time points are presented in Fig. S1 (page 6).

**<sup>1</sup>H NMR** (500 MHz, CDCl<sub>3</sub>): δ 4.42 (t, *J* = 8.9 Hz, 2H, OCH<sub>2</sub>), 3.15 (t, *J* = 8.9 Hz, 2H, OCH<sub>2</sub>CH<sub>2</sub>), 2.49 (nfom, 2H, =C-CH<sub>2</sub>), 2.23 (nfom, 2H, =C-CH<sub>2</sub>), 1.69 (nfom, 4H, CH<sub>2</sub>(CH<sub>2</sub>)<sub>2</sub>CH<sub>2</sub>), 0.98 [s, 9H, Si(CH<sub>3</sub>)<sub>3</sub>], 0.36 [s, 6H, Si(CH<sub>3</sub>)<sub>2</sub>C], and 0.33 [s, 9H, Si(CH<sub>3</sub>)<sub>3</sub>].

**<sup>13</sup>C NMR** (125 MHz, CDCl<sub>3</sub>): δ 198.2, 169.1, 157.6, 154.9, 136.2, 133.9, 130.6, 128.2, 115.7, 70.2, 31.3, 28.1, 27.5, 23.2, 21.5, 20.2, 18.9, 1.6, and 1.5.

**IR** (neat): 2929, 2856, 1737, 1370, 1301, 1255, 1225, 1015, 838, 810, and 760 cm<sup>-1</sup>.

**HRMS** (ESI-TOF): Calcd for C<sub>24</sub>H<sub>36</sub>NaO<sub>2</sub>Si<sub>2</sub><sup>+</sup> [M+Na<sup>+</sup>] requires 435.2146; found 435.2126.

**TLC**: R<sub>f</sub> 0.6 (9:1 Hex/EtOAc).

### Synthesis of indenoacetate **S6** (Fig. 3, entry 1 of manuscript)

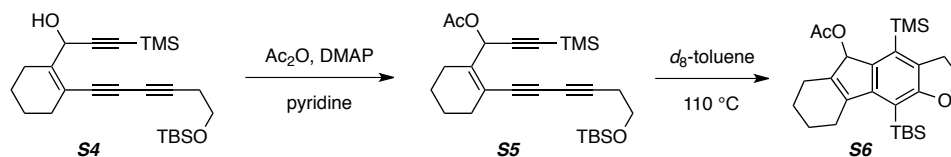

### 1-(2-(6-((*tert*-Butyldimethylsilyl)oxy)hexa-1,3-diyne-1-yl)cyclohex-1-en-1-yl)-3-(trimethylsilyl)prop-2-yn-1-yl acetate (**S5**)

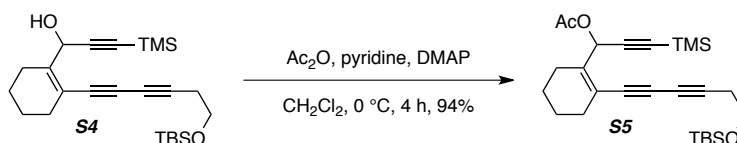

Acetic anhydride (26 mg, 0.25 mmol) was added to a stirred solution of alcohol **S4** (21 mg, 0.051 mmol), pyridine (0.50 mL, 6.2 mmol), and DMAP (1 mg, 0.008 mmol) in  $\text{CH}_2\text{Cl}_2$  (2 mL) at 0 °C. After 4 h the reaction mixture was diluted with water and extracted with  $\text{CH}_2\text{Cl}_2$ . The combined organic extracts were washed with brine, dried ( $\text{MgSO}_4$ ), and concentrated. The crude material was passed through a plug of silica gel with (hexanes:EtOAc 19:1 eluent) to give the acetate **S5** (22 mg, 0.048 mmol, 94%).

$^1\text{H NMR}$  (500 MHz,  $\text{CDCl}_3$ ):  $\delta$  6.46 (s, 1H,  $\text{CHOAc}$ ), 3.76 (t,  $J = 7.2$  Hz, 2H,  $\text{SiOCH}_2$ ), 2.55 (t,  $J = 7.2$  Hz, 2H,  $\equiv\text{CCH}_2$ ), 2.39 [br d,  $J = 19$  Hz, 1H,  $\text{CH}_a\text{H}_b\text{C}(\text{CHOAc})=\text{C}$ ], 2.20 [m, 3H,  $\text{CH}_a\text{H}_b\text{C}(\text{CHOAc})=\text{C}$  and  $\text{CH}_2\text{C}=\text{}$ ], 2.08 [s, 3H,  $\text{C}(=\text{O})\text{CH}_3$ ], 1.63 (nfom, 4H,  $\text{CH}_2(\text{CH}_2)_2\text{CH}_2$ ), 0.90 [s, 9H,  $\text{Si}(\text{CH}_3)_3$ ], 0.17 [s, 9H,  $\text{Si}(\text{CH}_3)_3$ ], and 0.08 [s, 6H,  $\text{Si}(\text{CH}_3)_2\text{C}$ ].

$^{13}\text{C NMR}$  (125 MHz,  $\text{CDCl}_3$ ):  $\delta$  169.4, 142.6, 119.6, 100.9, 91.2, 82.7, 80.4, 78.9, 73.1, 66.2, 61.6, 30.1, 26.0, 24.4, 24.2, 22.0, 21.9, 21.2, 18.5, -0.1, and -5.2.

**IR** (neat): 2933, 2859, 2177, 1750, 1251, 1223, 1108, 1019, 947, 843, and 778  $\text{cm}^{-1}$ .

**HRMS** (ESI-TOF): Calcd for  $\text{C}_{26}\text{H}_{40}\text{NaO}_3\text{Si}_2^+$  [ $\text{M}+\text{Na}^+$ ] requires 479.2408; found 479.2390.

**TLC**:  $R_f$  0.5 (9:1 Hex/EtOAc).

### 10-(*tert*-Butyldimethylsilyl)-4-(trimethylsilyl)-3,5,6,7,8,9-hexahydro-2H-fluoreno[3,2-*b*]furan-5-yl acetate (**S6**, entry 1, Fig. 3 of manuscript)

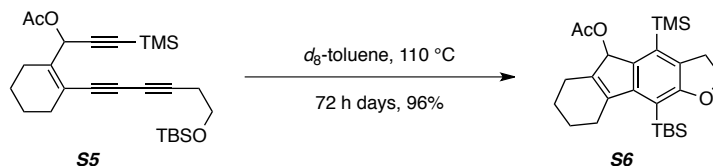

A solution of triyne **S5** (28 mg, 0.061 mmol) in  $d_8$ -toluene (0.6 mL) was heated at 110 °C (external bath temperature) in a sealed tube. After 72 h the solvent was evaporated and the crude residue was purified by flash chromatography (hexanes:EtOAc 49:1) to give the benzenoid **S6** (27 mg, 0.059 mmol, 96%).

$^1\text{H NMR}$  (500 MHz,  $\text{CDCl}_3$ ):  $\delta$  6.08 (d,  $J = 1.4$  Hz, 1H,  $\text{CHOAc}$ ), 4.47 (ddd,  $J = 5.6, 8.4, 10.0$  Hz, 1H,  $\text{OCH}_a\text{H}_b$ ), 4.30 (ddd,  $J = 9.0, 9.0, 9.0$  Hz, 1H,  $\text{OCH}_a\text{H}_b$ ), 3.27 (ddd,  $J = 9.7, 9.7, 15.1$  Hz, 1H,  $\text{ArCH}_a\text{H}_b$ ), 3.05 (ddd,  $J = 5.6, 9.4, 15.1$  Hz, 1H,  $\text{ArCH}_a\text{H}_b$ ), 2.49 [br d,  $J = 16.5$  Hz, 1H,

$CH_aH_bC(CHOAc)=C$ ], 2.36–2.47 [m, 3H,  $CH_aH_bC(CHOAc)=C$  and  $CH_2C=$ ], 2.15 [s, 3H,  $C(=O)CH_3$ ], 1.5–1.8 [m, 4H,  $CH_2(CH_2)_2CH_2$ ], 0.99 [s, 9H,  $SiC(CH_3)_3$ ], 0.344 [s, 6H,  $Si(CH_3)_2$ ], 0.340 [s, 6H,  $Si(CH_3)_2C$ ], and 0.33 [s, 9H,  $Si(CH_3)_3$ ].

$^{13}C$  NMR (125 MHz,  $CDCl_3$ ):  $\delta$  171.7, 166.6, 151.3, 141.6, 141.5, 139.5, 132.8, 127.5, 113.4, 78.6, 69.7, 31.7, 28.4, 26.9, 25.5, 23.2, 22.5, 22.0, 19.1, 1.8, 1.4, and 1.2.

IR (neat): 2929, 2856, 1737, 1370, 1301, 1255, 1225, 1015, 838, and 810  $cm^{-1}$ .

HRMS (ESI-TOF): Calcd for  $C_{26}H_{40}NaO_3Si_2^+$  [ $M+Na^+$ ] requires 479.2408; found 479.2414.

TLC:  $R_f$  0.52 (9:1 Hex/EtOAc).

### Synthesis of benzodifuran **S10** (Fig. 3, entry 2 of manuscript)

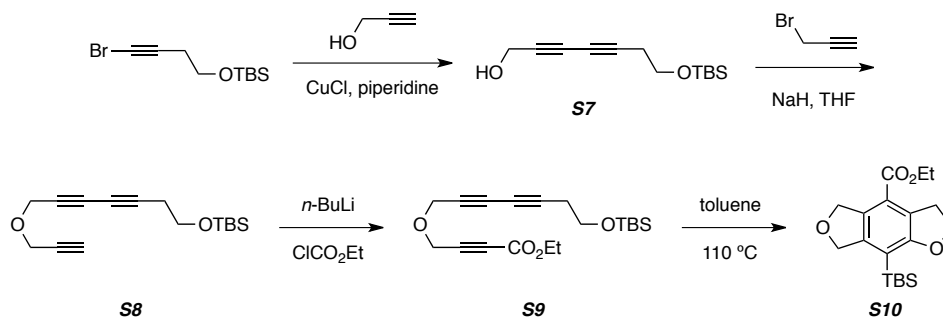

### 7-((*tert*-Butyldimethylsilyloxy)hepta-2,4-diyne-1-ol (**S7**))

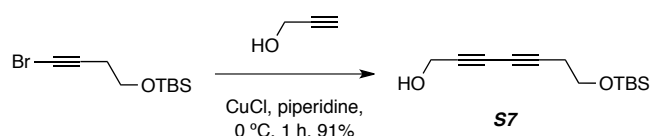

Diyne **S7** was prepared following general procedure B from ((4-bromobut-3-yn-1-yl)oxy)(*tert*-butyl)dimethylsilane<sup>7</sup> (1.00 g, 3.82 mmol), propargyl alcohol (260 mg, 4.6 mmol), CuCl (40 mg, 0.40 mmol), and piperidine (4 mL). Purification by flash chromatography (hexanes:EtOAc 5:1) gave the diyne **S7** (828 mg, 3.48 mmol, 91%) as a pale yellow oil.

<sup>1</sup>H NMR (500 MHz, CDCl<sub>3</sub>): δ 4.32 (dt, *J* = 6.3, 1.1 Hz, 2H, CH<sub>2</sub>OH), 3.74 (t, *J* = 6.9 Hz, 2H, CH<sub>2</sub>OSi), 2.50 (dt, *J* = 6.9, 1.1 Hz, 2H, C≡CCH<sub>2</sub>CH<sub>2</sub>), 1.55 (t, *J* = 6.3 Hz, 1H, CH<sub>2</sub>OH), 0.90 [s, 9H, SiC(CH<sub>3</sub>)<sub>3</sub>], and 0.08 [s, 6H, Si(CH<sub>3</sub>)<sub>2</sub>].

<sup>13</sup>C NMR (500 MHz, CDCl<sub>3</sub>): δ 78.9, 73.9, 70.9, 65.6, 61.4, 51.7, 26.0, 23.9, 18.5, and -5.2.

IR (neat): 3450, 2953, 2930, 2857, 2359, 2258, 1470, 1387, 1255, 1106, 913, 838, 778, and 746 cm<sup>-1</sup>.

HRMS (ESI-TOF): Calcd for C<sub>13</sub>H<sub>22</sub>NaO<sub>2</sub>Si<sup>+</sup> [M+Na<sup>+</sup>] requires 261.1281; found 261.1301.

### *tert*-Butyldimethyl((7-(prop-2-yn-1-yloxy)hepta-3,5-diyne-1-yl)oxy)silane (**S8**)

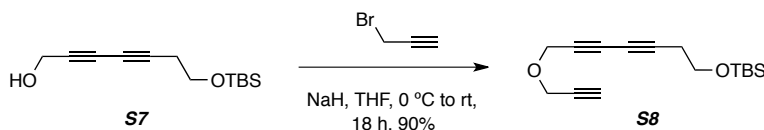

A solution of diyne **S7** (200 mg, 0.84 mmol) in THF (2 mL) was added to a stirred suspension of NaH (67 mg, 60% suspension in mineral oil, 1.68 mmol) in THF (10 mL) at 0 °C. The reaction mixture was allowed to warm to rt over 1 h and propargyl bromide (0.19 mL, 80 wt. % in toluene, 1.71 mmol) was added. After 18 h the mixture was cooled to 0 °C, water was added, and the aqueous layer was extracted with diethyl ether. The combined organic extracts were washed with brine, dried (MgSO<sub>4</sub>), and concentrated. Purification by flash chromatography (hexanes:EtOAc 20:1) gave the triyne **S8** (210 mg, 0.76 mmol, 90%) as a clear yellow oil.

<sup>1</sup>H NMR (500 MHz, CDCl<sub>3</sub>): δ 4.32 (t, *J* = 1.1 Hz, 2H, C≡CC≡CCH<sub>2</sub>O), 4.25 (d, *J* = 2.4 Hz, 2H, OCH<sub>2</sub>C≡CH), 3.74 (t, *J* = 7.0 Hz, 2H, CH<sub>2</sub>OSi), 2.50 (tt, *J* = 1.0, 7.0 Hz, CH<sub>2</sub>CH<sub>2</sub>OSi), 2.46 (t, *J* = 2.4 Hz, 1H, ≡CH), 0.90 [s, 9H, SiC(CH<sub>3</sub>)<sub>3</sub>], and 0.08 [s, 6H, Si(CH<sub>3</sub>)<sub>2</sub>].



$^{13}\text{C}$  NMR (125 MHz,  $\text{CDCl}_3$ ):  $\delta$  78.8, 78.6, 75.3, 72.0, 71.1, 65.6, 61.4, 57.1, 56.6, 26.0, 23.8, 18.4, and -5.2.

IR (neat): 3300, 2953, 2931, 2857, 2258, 1470, 1385, 1346, 1255, 1085, 839, and 779  $\text{cm}^{-1}$ .

HRMS (ESI-TOF): Calcd for  $\text{C}_{16}\text{H}_{24}\text{NaO}_2\text{Si}^+$  [ $\text{M}+\text{Na}^+$ ] requires 299.1438; found 299.1422.

### Ethyl 4-((7-((*tert*-Butyldimethylsilyl)oxy)hepta-2,4-diyne-1-yl)oxy)but-2-ynoate (**S9**)

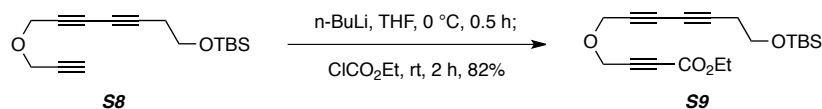

*n*-BuLi (0.25 mL, 2.5 M in hexanes, 0.62 mmol) was added to a stirred solution of triyne **S8** (170 mg, 0.62 mmol) in THF (5 mL) at 0 °C. After 0.5 h ethyl chloroformate (0.24 mL, 2.5 mmol) was added and the resulting solution was allowed to come to room temperature. After 2 h satd. aq.  $\text{NH}_4\text{Cl}$  was added and the mixture was extracted with EtOAc. The combined organic extracts were washed with brine, dried ( $\text{MgSO}_4$ ), and concentrated. Purification by MPLC (hexanes:EtOAc 7:1) gave the triyne **S9** (178 mg, 0.51 mmol, 82%) as a clear amber oil.

$^1\text{H}$  NMR (500 MHz,  $\text{CDCl}_3$ ):  $\delta$  4.39 (s, 2H,  $\text{CH}_2\text{C}=\text{CCO}_2\text{Et}$ ), 4.33 (t,  $J = 1.0$  Hz, 2H,  $\text{C}\equiv\text{CC}\equiv\text{CCH}_2\text{O}$ ), 4.25 (q,  $J = 7.2$  Hz, 2H,  $\text{CH}_2\text{CH}_3$ ), 3.75 (t,  $J = 6.9$  Hz, 2H,  $\text{CH}_2\text{OSi}$ ), 2.50 (tt,  $J = 1.0, 6.9$  Hz,  $\equiv\text{CCH}_2\text{CH}_2$ ), 1.32 (t,  $J = 7.2$  Hz, 3H,  $\text{CH}_2\text{CH}_3$ ), 0.90 [s, 9H,  $\text{Si}(\text{CH}_3)_3$ ], and 0.08 [s, 6H,  $\text{Si}(\text{CH}_3)_2$ ].

$^{13}\text{C}$  NMR (125 MHz,  $\text{CDCl}_3$ ):  $\delta$  153.1, 82.2, 79.0, 78.8, 72.6, 70.4, 65.5, 62.3, 61.4, 57.7, 56.2, 26.0, 23.8, 18.4, 14.1, and -5.2.

IR (neat): 2953, 2931, 2857, 2255, 1716, 1249, 1097, 1059, 839, and 780  $\text{cm}^{-1}$ .

HRMS (ESI-TOF): Calcd for  $\text{C}_{19}\text{H}_{28}\text{NaO}_4\text{Si}^+$  [ $\text{M}+\text{Na}^+$ ] requires 371.1649; found 371.1679.

### Ethyl 8-((*tert*-Butyldimethylsilyl)-2,3,5,7-tetrahydrobenzo[1,2-*b*:4,5-*c'*]difuran-4-carboxylate (**S10**, entry 2, Fig. 3 of manuscript)

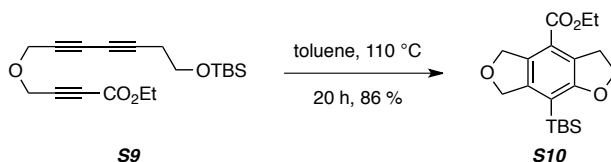

A solution of triyne **S9** (23 mg, 0.066 mmol) in toluene (3 mL) was heated at 110 °C (external bath temperature) in a sealed tube. After 20 h the mixture was concentrated and purified by MPLC (hexanes:EtOAc 7:1) to give the tricyclic ester **S10** (20 mg, 0.057 mmol, 86%) as a clear yellow oil.

$^1\text{H}$  NMR (500 MHz,  $\text{CDCl}_3$ ):  $\delta$  5.27 (br t,  $J = 2.2$  Hz, 2H,  $\text{OCH}_2\text{C}_{\text{Ar}}=\text{C}_{\text{Ar}}\text{CO}$ ), 5.06 (br s, 2H,  $\text{OCH}_2\text{C}_{\text{Ar}}=\text{C}_{\text{Ar}}\text{Si}$ ), 4.53 (t,  $J = 8.8$  Hz, 2H,  $\text{CH}_2\text{CH}_2\text{O}$ ), 4.34 (q,  $J = 7.1$  Hz, 2H,  $\text{CH}_2\text{CH}_3$ ), 3.49 (br t,  $J = 8.8$  Hz, 2H,  $\text{CH}_2\text{CH}_2\text{O}$ ), 1.38 (t,  $J = 7.1$  Hz, 3H,  $\text{CH}_2\text{CH}_3$ ), 0.90 [s, 9H,  $\text{Si}(\text{CH}_3)_3$ ], and 0.31 [s, 6H,  $\text{Si}(\text{CH}_3)_2$ ].

$^{13}\text{C}$  NMR (125 MHz,  $\text{CDCl}_3$ ):  $\delta$  166.9, 166.3, 146.5, 132.0, 127.9, 122.1, 116.2, 74.7, 74.5, 71.2, 61.0, 31.0, 26.8, 18.6, 14.5, and -3.4.

IR (neat): 2953, 2923, 2856, 1715, 1464, 1387, 1256, 1186, and 1038  $\text{cm}^{-1}$ .

HRMS (ESI-TOF): Calcd for  $\text{C}_{19}\text{H}_{28}\text{NaO}_4\text{Si}^+$  [ $\text{M}+\text{Na}^+$ ] requires 371.1649; found 371.1674.

### Synthesis of indoline **S15** (Fig. 3, entry 3 of manuscript)

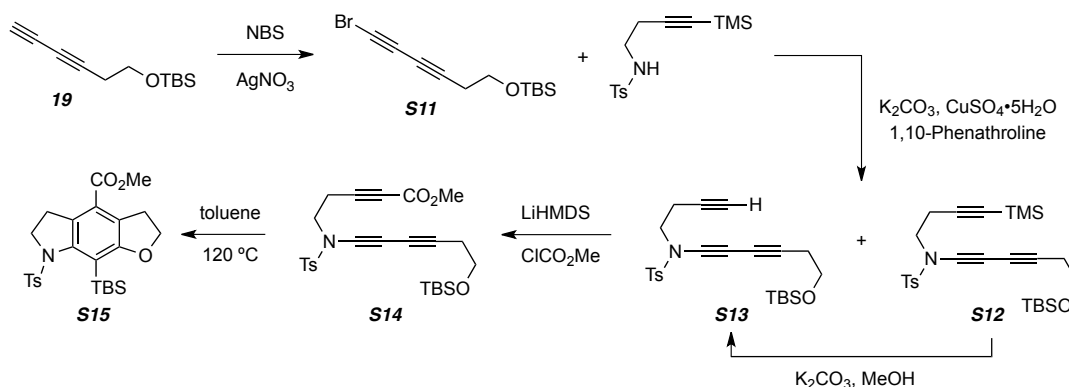

### ((6-Bromo-hexa-3,5-diyn-1-yl)oxy)*tert*-butyldimethylsilane (**S11**)

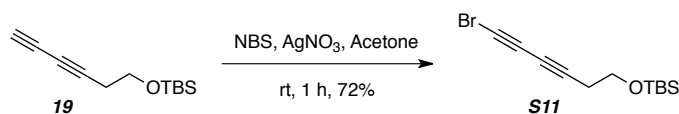

Bromoalkyne **S11** was prepared following general procedure A from diyne **19** (211 mg, 1.01 mmol), *N*-bromosuccinimide (NBS, 196 mg, 1.11 mmol), AgNO<sub>3</sub> (19 mg, 0.11 mmol), and acetone (10 mL). Purification by flash chromatography (hexanes:EtOAc 19:1) gave the bromodiyne **S11** (201 mg, 0.735 mmol, 72%) as a clear yellow oil.

<sup>1</sup>H NMR (500 MHz, CDCl<sub>3</sub>): δ 3.73 (t, *J* = 6.8 Hz, 2H, OCH<sub>2</sub>), 2.46 (t, *J* = 6.9 Hz, 2H, C≡CCH<sub>2</sub>), 0.89 [s, 9H, Si(CH<sub>3</sub>)<sub>3</sub>], and 0.07 [s, 6H, Si(CH<sub>3</sub>)<sub>2</sub>].

<sup>13</sup>C NMR (125 MHz, CDCl<sub>3</sub>): δ 74.5, 66.6, 65.8, 64.9, 61.4, 26.0, 23.7, 18.4, and -5.2.

IR (neat): 2953, 2930, 2857, 2224, 2144, 1469, 1386, 1255, 1107, 908, 836, and 778 cm<sup>-1</sup>.

HRMS (ESI-TOF): Calcd for C<sub>12</sub>H<sub>19</sub>AgBrOSi<sup>+</sup> [M+Ag<sup>+</sup>] requires 392.9434; found 392.9435.

### *N*-(6-((*tert*-Butyldimethylsilyl)oxy)hexa-1,3-diyn-1-yl)-4-methyl-*N*-(4-(trimethylsilyl)but-3-yn-1-yl)benzenesulfonamide (**S12**)

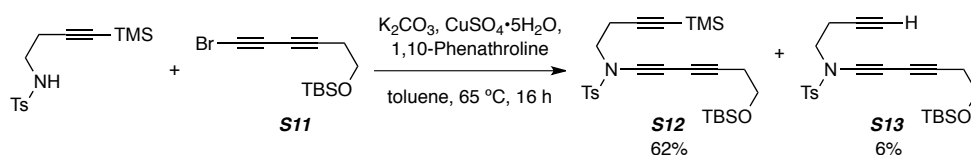

A solution of 4-methyl-*N*-(4-(trimethylsilyl)but-3-yn-1-yl)benzenesulfonamide<sup>8</sup> (200 mg, 0.680 mmol), **S11** (230 mg, 0.8 mmol), K<sub>2</sub>CO<sub>3</sub> (190 mg, 1.4 mmol), CuSO<sub>4</sub>·5H<sub>2</sub>O (17 mg, 0.068 mmol), and 1,10-phenanthroline (22 mg, 0.14 mmol) in anhydrous toluene (1 mL) was heated to 65 °C. After 16 h the reaction mixture was directly subjected to gradient flash chromatography (hexanes:EtOAc 12:1 to 5:1) to yield, in order of elution, the triynes **S12** (210 mg, 0.420 mmol, 62%) and **S13** (19 mg, 6%, 0.0378), each as a pale yellow oil.

<sup>1</sup>H NMR (500 MHz, CDCl<sub>3</sub>): δ 7.79 (d, *J* = 8.2 Hz, 2H, SO<sub>2</sub>ArH<sub>o</sub>), 7.36 (d, *J* = 8.2 Hz, 2H, SO<sub>2</sub>ArH<sub>m</sub>), 3.74 (t, *J* = 7.1 Hz, 2H, OCH<sub>2</sub>), 3.49 (d, *J* = 7.7 Hz, 2H, NCH<sub>2</sub>), 2.54 (t, *J* = 7.9 Hz, 2H, NCH<sub>2</sub>CH<sub>2</sub>),

2.52 (t,  $J = 7.1$  Hz, 2H,  $\text{OCH}_2\text{CH}_2$ ), 2.46 (s, 3H,  $\text{ArCH}_3$ ), 0.90 [s, 9H,  $\text{SiC}(\text{CH}_3)_3$ ], 0.13 [s, 9H,  $\text{Si}(\text{CH}_3)_3$ ], and 0.08 [s, 6H,  $\text{Si}(\text{CH}_3)_2\text{C}$ ].

$^{13}\text{C}$  NMR (125 MHz,  $\text{CDCl}_3$ ):  $\delta$  145.2, 134.8, 130.1, 127.7, 101.7, 87.6, 81.4, 67.2, 65.6, 61.6, 59.0, 50.4, 26.0, 24.1, 21.8, 20.0, 18.5, 0.1, and -5.2.

IR (neat): 2955, 2930, 2857, 2253, 2228, 2179, 1598, 1469, 1376, 1252, 1172, 1105, and 842  $\text{cm}^{-1}$ .

HRMS (ESI-TOF): Calcd for  $\text{C}_{26}\text{H}_{39}\text{NNaO}_3\text{SSi}_2^+$  [ $\text{M}+\text{Na}^+$ ] requires 524.2081; found 524.2088.

### *N*-(But-3-yn-1-yl)-*N*-(6-((*tert*-butyldimethylsilyl)oxy)hexa-1,3-diyn-1-yl)-4-methylbenzenesulfonamide (**S13**)

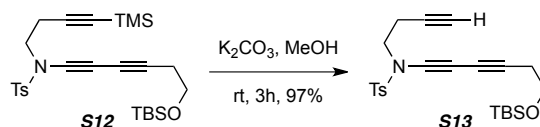

$\text{K}_2\text{CO}_3$  (62 mg, 0.44 mmol) was added to a stirred solution of **S12** (112 mg, 0.22 mmol) in MeOH (8 mL) at room temperature. After 3 h the reaction mixture was concentrated and purified by flash chromatography (hexanes:EtOAc 5:1) to yield **S13** (90 mg, 97%) as pale yellow oil.

$^1\text{H}$  NMR (500 MHz,  $\text{CDCl}_3$ ):  $\delta$  7.79 (d,  $J = 8.3$  Hz, 2H,  $\text{SO}_2\text{ArH}_o$ ), 7.36 (d,  $J = 8.1$  Hz, 2H,  $\text{SO}_2\text{ArH}_m$ ), 3.74 (t,  $J = 7.1$  Hz, 2H,  $\text{OCH}_2$ ), 3.50 (t,  $J = 7.5$  Hz, 2H,  $\text{NCH}_2$ ), 2.52 (t,  $J = 7.0$  Hz, 2H,  $\text{OCH}_2\text{CH}_2$ ), 2.51 (td,  $J = 7.4, 2.7$  Hz, 2H,  $\text{NCH}_2\text{CH}_2$ ), 2.46 (s, 3H,  $\text{ArCH}_3$ ), 1.97 (t,  $J = 2.6$  Hz, 1H,  $\text{C}\equiv\text{CH}$ ), 0.90 [s, 9H,  $\text{SiC}(\text{CH}_3)_3$ ], and 0.08 [s, 6H,  $\text{Si}(\text{CH}_3)_2$ ].

$^{13}\text{C}$  NMR (125 MHz,  $\text{CDCl}_3$ ):  $\delta$  145.3, 134.6, 130.1, 127.8, 81.5, 79.5, 70.9, 66.9, 65.5, 61.6, 59.2, 50.2, 26.0, 24.1, 21.8, 18.54, 18.47, and -5.1.

IR (neat): 3297, 2953, 2930, 2857, 2360, 2340, 2254, 2166, 1597, 1468, 1373, 1255, 1171, 1092, 903, and 839  $\text{cm}^{-1}$ .

HRMS (ESI-TOF): Calcd for  $\text{C}_{23}\text{H}_{31}\text{NNaO}_3\text{SSi}^+$  [ $\text{M}+\text{Na}^+$ ] requires 452.1686; found 452.1687.

### Methyl 5-(*N*-(6-((*tert*-Butyldimethylsilyl)oxy)hexa-1,3-diyn-1-yl)-4-methylphenylsulfonamido)pent-2-ynoate (**S14**)

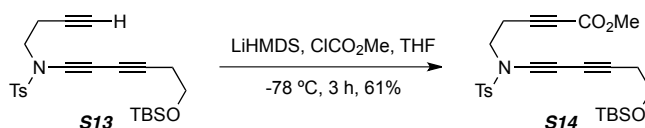

LiHMDS [0.15 mL, ca. 1.0 M in THF, 0.15 mmol, prepared by addition of *n*-BuLi (2.0 mL, 2.5 M in hexanes, 5.0 mmol) to a stirred solution of HMDS (1.0 mL, 4.8 mmol) in THF (2 mL) at  $-78$  °C] was added to a stirred solution of **S13** (43 mg, 0.10 mmol) in THF (1 mL) at  $-78$  °C. After 1 h methyl chloroformate was added at the same temperature. After an additional 2 h the reaction mixture was quenched with satd. aq.  $\text{NH}_4\text{Cl}$ , diluted with  $\text{H}_2\text{O}$ , and washed with EtOAc. The combined organic extracts were washed with brine, dried ( $\text{Na}_2\text{SO}_4$ ), and concentrated. Purification by flash chromatography (hexanes:EtOAc 5:1) gave the ynoate **S14** (30 mg, 61%) as a pale yellow oil and recovered starting material **S13** (11 mg, 26%).

$^1\text{H}$  NMR (500 MHz,  $\text{CDCl}_3$ ):  $\delta$  7.79 (d,  $J = 8.3$  Hz, 2H,  $\text{SO}_2\text{ArH}_o$ ), 7.37 (d,  $J = 8.1$  Hz, 2H,  $\text{SO}_2\text{ArH}_m$ ), 3.76 (s, 3H,  $\text{CO}_2\text{Me}$ ), 3.74 (t,  $J = 7.1$  Hz, 2H,  $\text{OCH}_2$ ), 3.55 (t,  $J = 7.5$  Hz, 2H,  $\text{NCH}_2$ ), 2.67 (t,  $J = 7.9$  Hz, 2H,  $\text{NCH}_2\text{CH}_2$ ), 2.53 (t,  $J = 7.0$  Hz, 2H,  $\text{OCH}_2\text{CH}_2$ ), 2.46 (s, 3H,  $\text{ArCH}_3$ ), 0.90 [s, 9H,  $\text{SiC}(\text{CH}_3)_3$ ], and 0.08 [s, 6H,  $\text{Si}(\text{CH}_3)_2$ ].

$^{13}\text{C}$  NMR (125 MHz,  $\text{CDCl}_3$ ):  $\delta$  153.8, 145.5, 134.4, 130.2, 127.8, 84.1, 81.8, 74.7, 66.5, 65.4, 61.6, 59.6, 52.9, 49.2, 26.0, 24.1, 21.9, 18.8, 18.5, and -5.1.

IR (neat): 2953, 2930, 2857, 2247, 2166, 1717, 1597, 1463, 1435, 1373, 1256, 1171, 1090, and 839  $\text{cm}^{-1}$ .

HRMS (ESI-TOF): Calcd for  $\text{C}_{25}\text{H}_{33}\text{NNaO}_5\text{SSi}^+$  [ $\text{M}+\text{Na}^+$ ] requires 510.1741; found 510.1779.

**Methyl 8-(*tert*-Butyldimethylsilyl)-7-toluenesulfonyl-3,5,6,7-tetrahydro-2*H*-furo[3,2-*f*]indole-4-carboxylate (S15, entry 3, Fig. 3 of manuscript)**

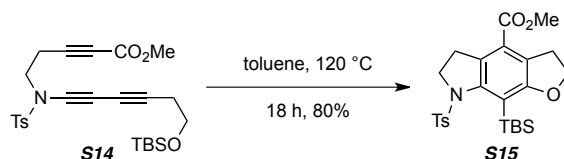

A solution of **S14** (15 mg, 0.031 mmol) in toluene (3 mL) in a sealed vial was heated to 120 °C (external bath temperature) in a sealed tube. After 18 h the reaction mixture was cooled and concentrated. Purification by flash chromatography (hexanes:EtOAc 5:1) gave the tricycle **S15** (12 mg, 0.025, 80%) as a pale yellow solid.

$^1\text{H}$  NMR (500 MHz,  $\text{CDCl}_3$ ):  $\delta$  7.22 (d,  $J = 8.3$  Hz, 2H,  $\text{SO}_2\text{Ar}H_o$ ), 7.12 (d,  $J = 8.6$  Hz, 2H,  $\text{SO}_2\text{Ar}H_m$ ), 4.64 (ddd,  $J = 8.9, 8.9, 7.9$  Hz, 1H,  $\text{OCH}_aH_b$ ), 4.53 (ddd,  $J = 9.7, 8.7, 8.7$  Hz, 1H,  $\text{OCH}_aH_b$ ), 4.02 (ddd,  $J = 13.1, 8.0, 1.1$  Hz, 1H,  $\text{NCH}_aH_b$ ), 3.77 (s, 3H,  $\text{CO}_2\text{Me}$ ), 3.71 (ddd,  $J = 13.2, 11.8, 8.5$  Hz, 1H,  $\text{NCH}_aH_b$ ), 3.46 (br t,  $J = 9$  Hz, 2H,  $\text{OCH}_2\text{CH}_2$ ), 2.60 (ddd,  $J = 16.9, 8.5, 1.0$  Hz, 1H,  $\text{NCH}_2\text{CH}_aH_b$ ), 2.37 (s, 3H,  $\text{ArMe}$ ), 1.74 (ddd,  $J = 16.9, 11.8, 8.0$  Hz, 1H,  $\text{NCH}_2\text{CH}_aH_b$ ), 0.95 [s, 9H,  $\text{SiC}(\text{CH}_3)_3$ ], 0.54 (s, 3H,  $\text{SiCH}_3$ ), and 0.41 (s, 3H,  $\text{SiCH}_3$ ).

$^{13}\text{C}$  NMR (125 MHz,  $\text{CDCl}_3$ ):  $\delta$  166.7, 166.1, 148.8, 144.1, 134.1, 131.0, 129.4, 128.2, 126.5, 123.0, 120.5, 70.9, 51.8, 51.7, 31.3, 29.1, 28.6, 21.7, 18.1, -0.9, and -1.9.

IR (neat): 2952, 2928, 2896, 2854, 1718, 1597, 1564, 1456, 1385, 1252, 1163, 1089, 1065, 1049, 1011, and 739  $\text{cm}^{-1}$ .

HRMS (ESI-TOF): Calcd for  $\text{C}_{25}\text{H}_{33}\text{NO}_5\text{SSi}^+$  [ $\text{M}+\text{H}^+$ ] requires 488.1921; found 488.1953.

mp: 144-147 °C.

### Synthesis of isoindoline **S17** (Fig. 3, entry 4 of manuscript)

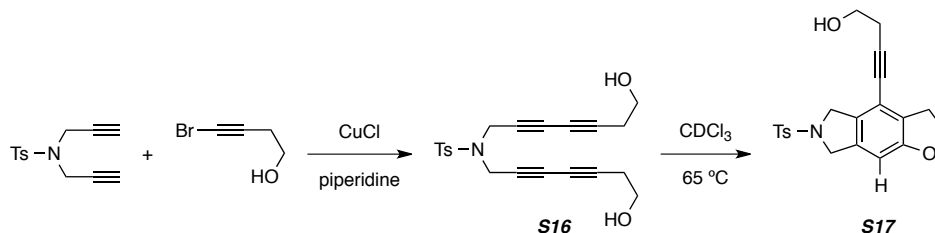

### *N,N*-Bis(7-hydroxyhepta-2,4-diyn-1-yl)-4-methylbenzenesulfonamide (**S16**)

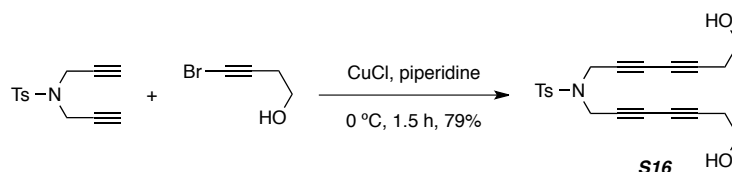

Tetrayne **S16** was prepared following **GP-2** from 4-methyl-*N,N*-di(prop-2-yn-1-yl)benzenesulfonamide<sup>9</sup> (247 mg, 1.0 mmol), 4-bromo-3-butyn-1-ol<sup>10</sup> (326 mg, 2.19 mmol), CuCl (20 mg, 0.20 mmol), and piperidine (2 mL). Purification by flash chromatography (EtOAc 100%) gave the tetrayne **S16** (302 mg, 0.79 mmol, 79%) as a pale yellow oil.

<sup>1</sup>H NMR (500 MHz, CDCl<sub>3</sub>): δ 7.70 (d, *J* = 8.3 Hz, 2H, SO<sub>2</sub>Ar*H<sub>o</sub>*), 7.34 (dd, *J* = 0.7, 8.6 Hz, 2H, SO<sub>2</sub>Ar*H<sub>m</sub>*), 4.18 (d, *J* = 0.6 Hz, 4H, NCH<sub>2</sub>), 3.73 (t, *J* = 6.2 Hz, 4H, CH<sub>2</sub>OH), 2.52 (t, *J* = 6.2 Hz, 4H, CH<sub>2</sub>CH<sub>2</sub>OH), 2.44 (s, 3H, CH<sub>3</sub>), and 1.99 (br s, 2H, OH).

<sup>13</sup>C NMR (75 MHz, CDCl<sub>3</sub>): δ 144.4, 134.6, 129.8, 127.9, 77.7, 70.8, 68.7, 65.9, 60.6, 37.4, 23.6, and 21.7.

IR (neat): 3349, 2943, 2888, 2258, 1597, 1420, 1348, 1160, 1045, and 750 cm<sup>-1</sup>.

HRMS (ESI-TOF): Calcd for C<sub>21</sub>H<sub>21</sub>NNaO<sub>4</sub>S<sup>+</sup> [M+Na<sup>+</sup>] requires 406.1083; found 406.1072

TLC: R<sub>f</sub> 0.4 (1:2 Hex/EtOAc).

### 4-(6-Toluenesulfonyl-3,5,6,7-tetrahydro-2*H*-furo[2,3-*f*]isoindol-4-yl)but-3-yn-1-ol (**S17**, entry 4, Fig. 3 of manuscript)

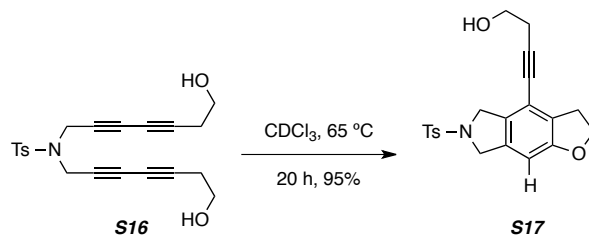

A solution of tetrayne **S16** (20 mg, 0.052 mmol) in CDCl<sub>3</sub> (0.6 mL) was heated at 65 °C. After 20 h the reaction mixture was concentrated and the residue purified by flash chromatography (hexanes:EtOAc 1:1) to give the isoindole **S17** (19 mg, 0.050 mmol, 95%).

<sup>1</sup>H NMR (500 MHz, CDCl<sub>3</sub>): δ 7.77 (d, *J* = 8.3 Hz, 2H, SO<sub>2</sub>Ar*H<sub>o</sub>*), 7.32 (d, *J* = 8.2 Hz, 2H, SO<sub>2</sub>Ar*H<sub>m</sub>*), 6.48 (s, 1H, Ar*H*), 4.57 (t, *J* = 8.7 Hz, 2H, CH<sub>2</sub>OAr), 4.55 (s, 2H, NCH<sub>2</sub>), 4.53 (s, 2H, NCH<sub>2</sub>), 3.82

(br dt,  $J = 5, 5$  Hz, 2H,  $\text{CH}_2\text{OH}$ ), 3.17 (t,  $J = 8.7$  Hz, 2H,  $\text{CH}_2\text{CH}_2\text{OAr}$ ), 2.73 (t,  $J = 6.4$  Hz, 2H,  $\text{CH}_2\text{CH}_2\text{OH}$ ), 2.41 (s, 3H,  $\text{CH}_3$ ), and 1.80 (br s, 1H,  $\text{OH}$ ).

$^{13}\text{C}$  NMR (125 MHz,  $\text{CDCl}_3$ ):  $\delta$  160.1, 143.8, 136.0, 134.0, 130.00, 129.98, 129.6, 127.7, 115.2, 103.6, 94.0, (77.0, a singlet with this chemical shift is observed in the spectrum in acetone), 71.9, 61.3, 54.3, 53.4, 29.5, 24.1, and 21.7.

$^{13}\text{C}$  NMR [125 MHz,  $(\text{CD}_3)_2\text{CO}$ ]: 161.2, 144.6, 137.0, 134.9, 130.7, 130.5, 130.3, 128.5, 116.3, 104.1, 96.2, 77.0, 72.4, 61.5, 55.0, 54.0, (29.5, a singlet with this chemical shift is observed in the spectrum in chloroform), 24.5, and 21.4.

IR (neat): 3389, 2939, 2886, 2259, 1598, 1449, 1342, 1160, 1094, 1051, and  $816\text{ cm}^{-1}$ .

HRMS (ESI-TOF): Calcd for  $\text{C}_{21}\text{H}_{21}\text{NNaO}_4\text{S}^+$  [ $\text{M}+\text{Na}^+$ ] requires 406.1083; found 406.1059.

TLC:  $R_f$  0.5 (1:1 Hex/EtOAc).

### Synthesis of isoindolinone **S20** (Fig. 3, entry 5 of manuscript)

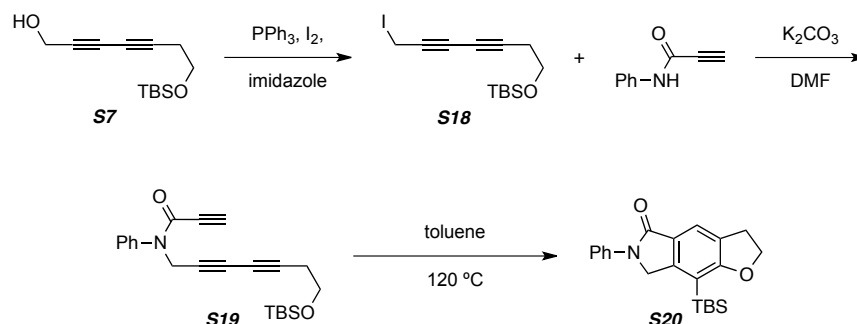

### *N*-Phenylpropiolamide

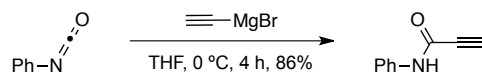

Ethynylmagnesium bromide (16 mL, 0.5 M in THF, 8 mmol) was added to a stirred solution of phenyl isocyanate (480 mg, 4 mmol) in anhydrous THF (3 mL) under a N<sub>2</sub> atmosphere and at 0 °C. After 4 h the reaction mixture was diluted with satd. aq. NH<sub>4</sub>Cl and extracted with ether. The organic extracts were washed with brine, dried (Na<sub>2</sub>SO<sub>4</sub>), and concentrated. Purification by flash chromatography (hexanes:EtOAc 7:3) gave *N*-phenylpropiolamide (508 mg, 3.44 mmol, 86%). The spectral data were consistent with reported values.<sup>11</sup>

### *tert*-Butyl((7-iodohepta-3,5-diyne-1-yl)oxy)dimethylsilane (**S18**)

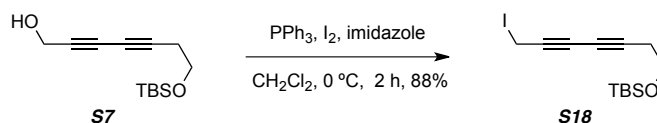

PPh<sub>3</sub> (120 mg, 0.46 mmol), I<sub>2</sub> (127 mg, 0.50 mmol), and imidazole (57 mg, 0.84 mmol) were sequentially added to a stirred solution of alcohol **S7** (100 mg, 0.42 mmol) in CH<sub>2</sub>Cl<sub>2</sub> (2 mL) at 0 °C. After 2 h the reaction mixture was diluted with CH<sub>2</sub>Cl<sub>2</sub> and washed with satd. aq. Na<sub>2</sub>S<sub>2</sub>O<sub>3</sub>. The organic extract was washed with brine, dried (Na<sub>2</sub>SO<sub>4</sub>), and concentrated. Purification by flash chromatography (hexanes:EtOAc 12:1) gave the iodide **S18** (128 mg, 0.37 mmol, 88%) as a pale yellow oil.

<sup>1</sup>H NMR (500 MHz, CDCl<sub>3</sub>): δ 3.739 (t, *J* = 1.2 Hz, 2H, ICH<sub>2</sub>), 3.737 (t, *J* = 7.0 Hz, 2H, SiOCH<sub>2</sub>), 2.49 (tt, *J* = 7.0, 1.3 Hz, 2H, SiCH<sub>2</sub>CH<sub>2</sub>), 0.89 [s, 9H, SiC(CH<sub>3</sub>)<sub>3</sub>], and 0.07 [s, 6H, Si(CH<sub>3</sub>)<sub>2</sub>].

<sup>13</sup>C NMR (125 MHz, C<sub>6</sub>D<sub>6</sub>): δ 80.9, 73.8, 71.4, 67.3, 61.9, 26.6, 24.5, 19.0, 4.7, and -18.5.

IR (neat): 2953, 2929, 2856, 2251, 1687, 1469, 1410, 1386, 1361, 1254, 1143, 1104, 1055, 1006, 909, and 838 cm<sup>-1</sup>.

HRMS (CIMS): Calcd for C<sub>13</sub>H<sub>15</sub>INOSi<sup>+</sup> [M+NH<sub>4</sub><sup>+</sup>] requires 366.0745; found 366.0773.

### *N*-(7-((*tert*-Butyldimethylsilyl)oxy)hepta-2,4-diyne-1-yl)-*N*-phenylpropiolamide (**S19**)

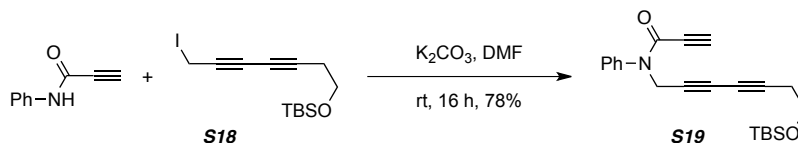

$K_2CO_3$  (40 mg, 0.29 mmol) was added to a stirred solution of *N*-phenylpropiolamide (23 mg, 0.16 mmol) and iodide **S18** (50 mg, 0.14 mmol) in DMF (1.4 mL) at rt. After 16 h the reaction mixture was concentrated and the residue was purified by flash chromatography (hexanes:EtOAc 5:1) to give the amide **S19** (41 mg, 0.11 mmol, 78%) as a pale yellow oil.

$^1H$  NMR (500 MHz,  $CDCl_3$ , as an 8:1 mixture of rotamers): major rotamer:  $\delta$  7.47-7.39 (m, 3H,  $ArH_mH_p$ ), 7.35 (dd,  $J = 7.9, 1.7$  Hz, 2H,  $ArH_o$ ), 4.58 (t,  $J = 1.1$  Hz, 2H,  $ArNCH_2$ ), 3.72 (t,  $J = 6.9$  Hz, 2H,  $SiOCH_2$ ), 2.83 (s, 1H,  $C\equiv CH$ ), 2.46 (tt,  $J = 6.9, 1.2$  Hz, 2H,  $SiOCH_2CH_2$ ), 0.89 [s, 9H,  $Si(CH_3)_3$ ], and 0.06 [s, 6H,  $Si(CH_3)_2$ ]. Minor rotamer:  $\delta$  4.75 (t,  $J = 1.1$  Hz,  $ArNCH_2$ ), 3.74 (br t,  $J = 7.0$  Hz,  $SiOCH_2$ ), 2.49 (br t,  $J = 7.0$  Hz,  $SiOCH_2CH_2$ ), and 0.07 [s, 6H,  $Si(CH_3)_2$ ].

$^{13}C$  NMR (125 MHz,  $CDCl_3$ ):  $\delta$  152.7, 140.5, 129.5, 129.0, 128.5, 80.5, 77.7, 75.8, 70.1, 69.6, 65.8, 61.4, 38.8, 26.0, 23.8, 18.4, and -5.2.

IR (neat): 3284, 2953, 2929, 2856, 2259, 2110, 1717, 1646, 1594, 1494, 1469, 1384, 1275, 1255, 1220, 1105, and 839.

HRMS (ESI-TOF): Calcd for  $C_{22}H_{27}NNaO_2Si^+$  [ $M+Na^+$ ] requires 388.1703; found 388.1736.

### 8-(*tert*-Butyldimethylsilyl)-6-phenyl-6,7-dihydro-2*H*-furo[2,3-*f*]isoindol-5(3*H*)-one (**S20**, entry 5, Fig. 3 of manuscript)

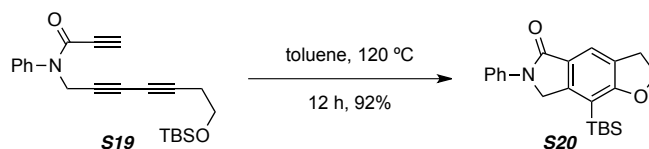

A solution of amide **S19** (25 mg, 0.068 mmol) in toluene (2 mL) in a sealed vial was heated to 120 °C (external bath temperature) in a sealed tube. After 12 h the reaction mixture was concentrated and the residue was purified by flash chromatography (hexanes:EtOAc 4:1) to give the amide **S20** as an (23 mg, 0.063 mmol, 92%) off-white solid.

$^1H$  NMR (500 MHz,  $CDCl_3$ ):  $\delta$  7.84 (dd,  $J = 8.8, 1.2$  Hz, 2H,  $PhH_o$ ), 7.71 (t,  $J = 1.3$  Hz, 1H,  $ArH$ ), 7.42 (dd,  $J = 8.7, 7.4$  Hz, 2H,  $PhH_m$ ), 7.15 (tt,  $J = 7.4, 1.2$  Hz, 1H,  $ArH$ ), 4.76 (s, 2H,  $ArCH_2N$ ), 4.60 (t,  $J = 8.7, 2H, OCH_2$ ), 3.25 (br t,  $J = 8.6$  Hz, 2H,  $ArCH_2CH_2O$ ), 0.92 [s, 9H,  $Si(CH_3)_3$ ], and 0.42 [s, 6H,  $Si(CH_3)_2$ ].

$^{13}C$  NMR (125 MHz,  $CDCl_3$ ):  $\delta$  169.9, 167.7, 147.9, 140.0, 129.3, 127.5, 125.8, 124.0, 121.9, 119.2, 111.7, 71.4, 52.7, 29.0, 26.8, 18.7, and -3.3.

IR (neat): 2953, 2922, 2891, 2854, 1691, 1595, 1499, 1461, 1440, 1400, 1379, 1335, 1248, 1176, 1156, 1113, 889, and 838  $cm^{-1}$ .

HRMS (ESI-TOF): Calcd for  $C_{26}H_{27}O_2Si^+$  [ $M+H^+$ ] requires 366.1884; found 366.1904.

mp: >225 °C.



### Synthesis of benzodifuranone **S22** (Fig. 3, entry 6 of manuscript)

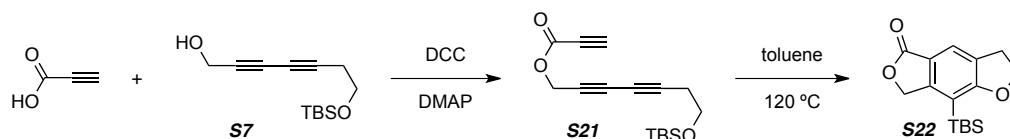

### 7-((*tert*-Butyldimethylsilyloxy)hepta-2,4-diyne-1-yl) Propiolate (**S21**)

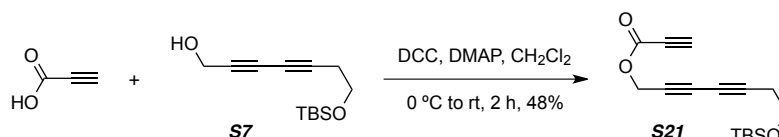

DCC (110 mg, 0.55 mmol) was added to a stirred solution of propiolic acid (39 mg, 0.55 mmol), alcohol **S7** (119 mg, 0.50 mmol), and DMAP (6 mg, 0.05 mmol) in  $\text{CH}_2\text{Cl}_2$  (3 mL) at 0 °C. After 2 h the mixture was passed through a plug of Celite<sup>®</sup> (EtOAc eluent) and concentrated. Purification by flash chromatography (hexanes:EtOAc 12:1) gave the ester **S21** (71 mg, 0.24 mmol, 48%) as a pale yellow oil.

<sup>1</sup>H NMR (500 MHz,  $\text{CDCl}_3$ ):  $\delta$  4.83 (t,  $J = 1.1$  Hz, 2H,  $\text{CO}_2\text{CH}_2$ ), 3.74 (t,  $J = 6.9$  Hz, 2H,  $\text{OCH}_2$ ), 2.94 (s, 1H,  $\text{C}\equiv\text{CH}$ ), 2.50 (tt,  $J = 1.1, 6.9$  Hz, 2H,  $\text{OCH}_2\text{CH}_2$ ), 0.90 [s, 9H,  $\text{SiC}(\text{CH}_3)_3$ ] and 0.07 [s, 6H,  $\text{Si}(\text{CH}_3)_2$ ].

<sup>13</sup>C NMR (125 MHz,  $\text{CDCl}_3$ ):  $\delta$  151.9, 79.9, 76.1, 74.0, 72.7, 68.1, 65.3, 61.3, 54.2, 26.0, 23.9, 18.4, and -5.2.

IR (neat): 3289, 2953, 2931, 2836, 2857, 2262, 2123, 1724, 1470, 1367, 1257, 1206, 1105, and  $839\text{cm}^{-1}$ .

HRMS (CIMS): Calcd for  $\text{C}_{16}\text{H}_{22}\text{NaO}_3\text{Si}^+$  [ $\text{M}+\text{Na}^+$ ] requires 313.1230; found 313.1252.

### 8-((*tert*-Butyldimethylsilyl)-2,3-dihydrobenzo[1,2-*b*:4,5-*c'*]difuran-5(7*H*)-one (**S22**, entry 6, Fig. 3 of manuscript)

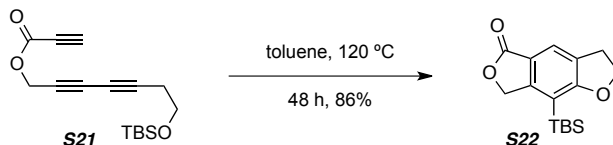

A solution of triyne **S21** (29 mg, 0.10 mmol) in toluene (4 mL) was heated to 120 °C (external bath temperature) in a sealed tube. After 48 h the reaction mixture was concentrated and purified by flash chromatography (hexanes:EtOAc 4:1) gave the tricycle **S22** (25 mg, 0.086, 86%) as a white solid.

<sup>1</sup>H NMR (500 MHz,  $\text{CDCl}_3$ ):  $\delta$  7.67 (t,  $J = 1.4$  Hz, 1H, ArH), 5.20 (s, 2H,  $\text{ArCH}_2\text{O}$ ), 4.64 (t,  $J = 8.7$  Hz, 2H,  $\text{ArCH}_2\text{CH}_2$ ), 3.25 (dt,  $J = 8.7, 1.2$  Hz, 2H,  $\text{ArCH}_2\text{CH}_2$ ), 0.89 [s, 9H,  $\text{SiC}(\text{CH}_3)_3$ ], and 0.33 [s, 6H,  $\text{Si}(\text{CH}_3)_2$ ].

<sup>13</sup>C NMR (125 MHz,  $\text{CDCl}_3$ ):  $\delta$  171.5, 171.4, 155.3, 128.7, 123.2, 117.9, 111.4, 71.9, 71.2, 28.7, 26.7, 18.6, and 3.8.

IR (neat): 2949, 2927, 2902, 2855, 1747, 1589, 1459, 1400, 1360, 1325, 1259, 1099, 1023, 1013, 881, and  $839\text{cm}^{-1}$ .

HRMS (CIMS): Calcd for  $\text{C}_{16}\text{H}_{22}\text{NaO}_3\text{Si}^+$  [ $\text{M}+\text{Na}^+$ ] requires 313.1230; found 313.1237.

mp: 167–169 °C.

### Synthesis of indane diester S24 (Fig. 3, entry 7 of manuscript)

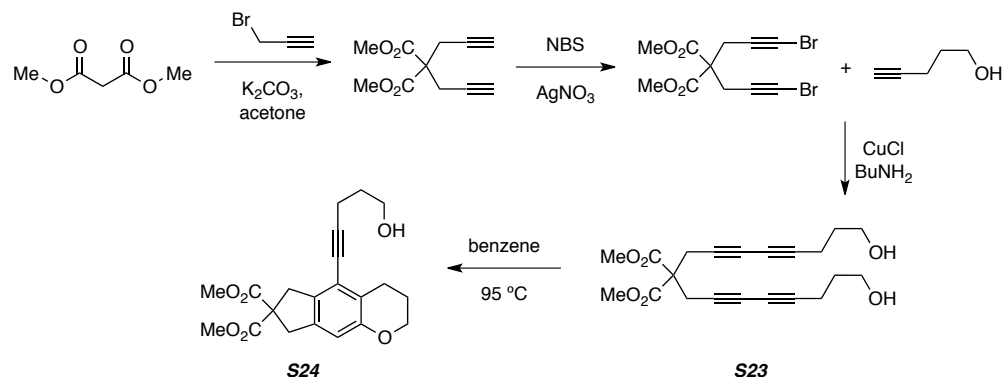

### Dimethyl 2,2-Di(prop-2-yn-1-yl)malonate

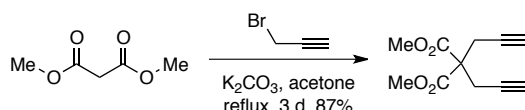

Propargyl bromide (7.8 mL, 80 wt. % in toluene, 70 mmol) was added to a stirred suspension of dimethyl malonate (2.00 mL, 17.5 mmol) and  $K_2CO_3$  (5.32 g, 38.5 mmol) in acetone (30 mL) under a  $N_2$  atmosphere and the mixture was brought to reflux (ca. 60 °C). After 3 d the reaction mixture was diluted with water and extracted with  $CH_2Cl_2$ . The combined organic layers were washed with brine, dried ( $MgSO_4$ ), and concentrated. Purification by flash chromatography (hexanes:EtOAc 3:1) gave the dimethyl 2,2-di(prop-2-yn-1-yl)malonate (3.15 g, 15.2 mmol, 87%) as a colorless oil which solidified upon standing. The spectral data were consistent with reported values.<sup>12</sup>

### Dimethyl 2,2-Bis(3-bromoprop-2-yn-1-yl)malonate

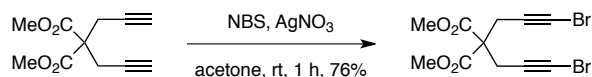

Dimethyl 2,2-bis(3-bromoprop-2-yn-1-yl)malonate was prepared following general procedure A from dimethyl 2,2-di(prop-2-yn-1-yl)malonate (1.2 g, 5.8 mmol), *N*-bromosuccinimide (2.26 g, 12.7 mmol),  $AgNO_3$  (97 mg, 0.57 mmol), and acetone (40 mL). Purification by flash chromatography (hexanes:EtOAc 8:1) gave the known dibromodiyne<sup>13</sup> as a clear colorless oil (2.56 g, 12.6 mmol, 76%). The spectral data were consistent with reported values.

### Dimethyl 2,2-Bis(8-hydroxyocta-2,4-diyn-1-yl)malonate (S23)

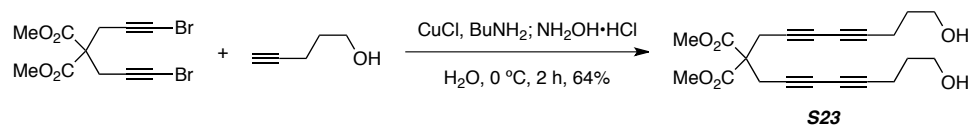

$CuCl$  (40 mg, 0.4 mmol) was added to a 30% aqueous solution of butylamine (15 mL) at 0 °C with stirring. Hydroxylamine hydrochloride was added until the solution was colorless (~10 mg) followed by a solution of pent-4-yn-1-ol (0.2 mL, 2.2 mmol) in dichloromethane (3 mL). A solution of dimethyl 2,2-bis(3-bromoprop-2-yn-1-yl)malonate (320 mg, 0.88 mmol; 5 mL  $CH_2Cl_2$ ) was added dropwise to the

yellow solution, and the resulting mixture allowed to come to rt. After 2 h water (10 mL) was added, the aqueous phase was extracted with CH<sub>2</sub>Cl<sub>2</sub>, and the combined organics were washed with satd. aq. NH<sub>4</sub>Cl solution and brine, dried (MgSO<sub>4</sub>), and concentrated. Purification by flash chromatography (hexanes:EtOAc 1:1) gave tetrayne **S23** (210 mg, 0.56 mmol, 64%) as a clear yellow oil.

<sup>1</sup>H NMR (500 MHz, CDCl<sub>3</sub>): δ 3.77 (s, 6H, CO<sub>2</sub>CH<sub>3</sub>), 3.73 (t, *J* = 6.1 Hz, 4H, CH<sub>2</sub>OH), 3.06 [s, 4H, C(CO<sub>2</sub>Me)<sub>2</sub>CH<sub>2</sub>C≡C], 2.38 (t, *J* = 7.0 Hz, 4H, C≡CCH<sub>2</sub>CH<sub>2</sub>), 1.77 (tt, *J* = 7.0, 6.1 Hz, 4H, CH<sub>2</sub>CH<sub>2</sub>CH<sub>2</sub>), and 1.37 (br s, 2H, CH<sub>2</sub>OH).

<sup>13</sup>C NMR (125 MHz, CDCl<sub>3</sub>): δ 168.9, 78.1, 70.9, 68.7, 65.4, 61.4, 56.7, 53.4, 30.9, 23.9, and 15.8.

IR (neat): 3355, 2953, 2258, 1739, 1435, 1318, 1294, 1209, and 1055 cm<sup>-1</sup>.

HRMS (ESI-TOF): Calcd for C<sub>21</sub>H<sub>24</sub>NaO<sub>6</sub><sup>+</sup> [M+Na<sup>+</sup>] requires 395.1465; found 395.1461.

TLC: R<sub>f</sub> 0.3 (1:2 Hex/EtOAc).

### Dimethyl 5-(5-Hydroxypent-1-yn-1-yl)-3,4,6,8-tetrahydrocyclopenta[g]chromene-7,7(2H)-dicarboxylate (**S23**, entry 7, Fig. 3 of manuscript)

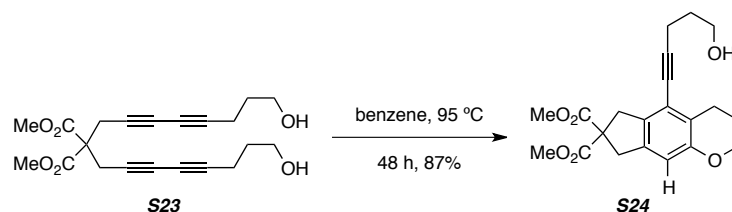

A solution of tetrayne **S23** (23 mg, 0.062 mmol) in benzene (1 mL) was heated at 95 °C (external bath temperature) in a sealed tube. After 48 h the mixture was concentrated and the crude material was purified by MPLC (hexanes:EtOAc 1:2) to give the tricyclic **S24** (20 mg, 0.054 mmol, 87%) as an amber oil.

<sup>1</sup>H NMR (500 MHz, CDCl<sub>3</sub>): δ 6.59 (s, 1H, ArH), 4.10 (br t, *J* = 5.1 Hz, 2H, CH<sub>2</sub>OC), 3.84 (t, *J* = 6.2 Hz, 2H, CH<sub>2</sub>OH), 3.75 (s, 6H, CO<sub>2</sub>CH<sub>3</sub>), 3.56 [s, 2H, C(CO<sub>2</sub>Me)<sub>2</sub>CH<sub>2</sub>C<sub>Ar</sub>=C<sub>Ar</sub>C≡C], 3.52 [br s, 2H, C(CO<sub>2</sub>Me)<sub>2</sub>CH<sub>2</sub>C<sub>Ar</sub>=C<sub>Ar</sub>H], 2.79 (br t, *J* = 6.6 Hz, 2H, CCH<sub>2</sub>CH<sub>2</sub>CH<sub>2</sub>OC), 2.61 (t, *J* = 6.9 Hz, 2H, CH<sub>2</sub>CH<sub>2</sub>CH<sub>2</sub>OH), 1.97 (br pent, *J* = 6.5 Hz, 2H, CCH<sub>2</sub>CH<sub>2</sub>CH<sub>2</sub>OC), and 1.88 (tt, *J* = 6.9, 6.2 Hz, 2H, CH<sub>2</sub>CH<sub>2</sub>CH<sub>2</sub>OH).

<sup>13</sup>C NMR (500 MHz, CDCl<sub>3</sub>): δ 172.3, 154.4, 138.3, 134.4, 122.6, 119.9, 112.4, 97.7, 77.5, 66.2, 61.9, 60.0, 53.1, 40.9, 40.2, 31.8, 24.0, 22.3, and 16.4.

IR (neat): 3458, 2951, 2876, 2229, 1734, 1604, 1587, 1436, 1341, 1253, 1199, 1174, 1160, 1132, 1104, and 1060 cm<sup>-1</sup>.

HRMS (ESI-TOF): Calcd for C<sub>21</sub>H<sub>24</sub>O<sub>6</sub> [M+Na<sup>+</sup>] requires 395.1465; found 395.1495.

TLC: R<sub>f</sub> 0.3 (1:1 Hex/EtOAc).

### Synthesis of dibenzoxepinone **S28** (Fig. 3, entry 8 of manuscript)

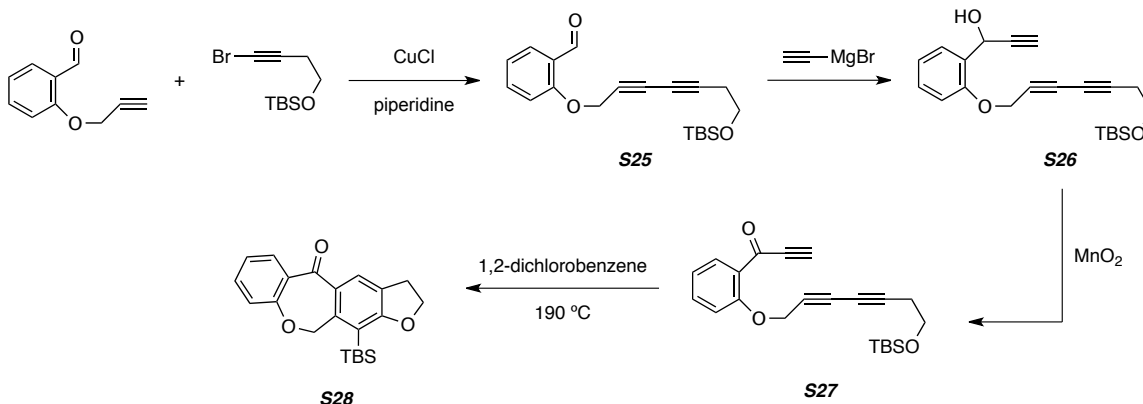

### 2-((7-((*tert*-Butyldimethylsilyl)oxy)hepta-2,4-diyn-1-yl)oxy)benzaldehyde (**S25**)

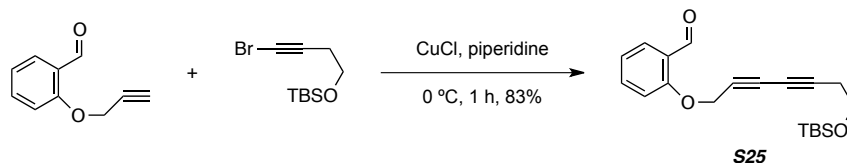

CuCl (20 mg, 0.2 mmol) was added to a solution of 2-(prop-2-yn-1-yloxy)benzaldehyde<sup>14</sup> (320 mg, 2.0 mmol) and 4-*t*-butyldimethylsilyloxy-1-butyne bromide<sup>7</sup> (576 mg, 2.2 mmol) in freshly deaerated piperidine (4 mL) at 0 °C. After 1 h the reaction mixture was partitioned between EtOAc and satd. aq. NH<sub>4</sub>Cl. The aqueous phase was extracted twice with EtOAc and the combined organic extracts were washed with brine, dried (MgSO<sub>4</sub>), and concentrated. Purification by flash chromatography (hexanes:EtOAc 9:1) gave the diynal **S25** (569 mg, 1.66 mmol, 83%) as a pale red oil.

<sup>1</sup>H NMR (500 MHz, CDCl<sub>3</sub>): δ 10.47 (d, *J* = 0.7 Hz, 1H, CHO), 7.86 (dd, *J* = 1.8, 7.9 Hz, 1H, *H*<sub>6</sub>), 7.57 (ddd, *J* = 1.9, 7.4, 8.4 Hz, 1H, *H*<sub>4</sub>), 7.10 (br d, *J* = 7 Hz, 1H, *H*<sub>3</sub>), 7.09 (dddd, *J* = 0.9, 0.9, 7, 7 Hz, 1H, *H*<sub>5</sub>), 4.88 (t, *J* = 1.1 Hz, 2H, C<sub>Ar</sub>OCH<sub>2</sub>), 3.73 (t, *J* = 6.9 Hz, 2H, CH<sub>2</sub>OSi), 2.49 (tt, *J* = 1.1, 7.0 Hz, 2H, ≡CCH<sub>2</sub>CH<sub>2</sub>), 0.88 [s, 9H, Si(CH<sub>3</sub>)<sub>3</sub>], and 0.06 [s, 6H, Si(CH<sub>3</sub>)<sub>2</sub>].

<sup>13</sup>C NMR (125 MHz, CDCl<sub>3</sub>): δ 189.6, 159.9, 135.9, 128.8, 125.6, 121.8, 113.3, 79.9, 73.2, 69.5, 65.3, 61.3, 57.1, 26.0, 23.8, 18.4, and -5.2.

IR (neat): 2953, 2930, 2857, 2259, 1691, 1599, 1480, 1460, 1288, 1255, 1217, 1105, 1012, 838, 778, and 759 cm<sup>-1</sup>.

HRMS (ESI-TOF): Calcd for C<sub>20</sub>H<sub>26</sub>NaO<sub>3</sub>Si<sup>+</sup> [M+Na<sup>+</sup>] requires 365.1543; found 365.1548.

TLC: R<sub>f</sub> 0.4 (9:1 Hex/EtOAc).

### 1-(2-((7-((*tert*-Butyldimethylsilyl)oxy)hepta-2,4-diyn-1-yl)oxy)phenyl)prop-2-yn-1-ol (**S26**)

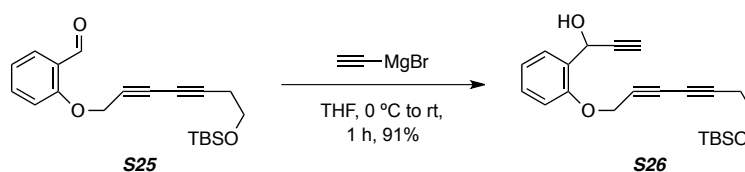

Ethynylmagnesium bromide (2 mL, 0.5 M in THF, 1 mmol) was added to a stirred solution of aldehyde **S25** (180 mg, 0.53 mmol) in anhydrous THF (3 mL) at 0 °C and under an atmosphere of N<sub>2</sub>. After 1 hour the reaction mixture was diluted with satd. aq. NH<sub>4</sub>Cl and extracted with Et<sub>2</sub>O. The combined organic extracts were washed with brine, dried (MgSO<sub>4</sub>), and concentrated. Purification by flash chromatography (hexanes:EtOAc 6:1) gave the triynol **S26** (176 mg, 0.48 mmol, 91%) as a clear colorless oil.

<sup>1</sup>H NMR (500 MHz, CDCl<sub>3</sub>): δ 7.62 (dd, *J* = 1.7, 7.6 Hz, 1H, *H6*), 7.33 (ddd, *J* = 1.8, 7.5, 8.3 Hz, 1H, *H4*), 7.04 (ddd, *J* = 1.1, 7.5, 7.5 Hz, 1H, *H5*), 7.01 (dd, *J* = 1.1, 8.3 Hz, 1H, *H3*), 5.73 (dd, *J* = 2.3, 6.3 Hz, 1H, *CHOH*), 4.83 (t, *J* = 1.1 Hz, 2H, C<sub>Ar</sub>OCH<sub>2</sub>), 3.73 (t, *J* = 6.9 Hz, 2H, CH<sub>2</sub>OSi), 2.83 (d, *J* = 6.3 Hz, 1H, *OH*), 2.62 (d, *J* = 2.3 Hz, 1H, ≡CH), 2.49 (tt, *J* = 1.0, 6.9 Hz, 2H, CH<sub>2</sub>CH<sub>2</sub>OSi), 0.89 [s, 9H, SiC(CH<sub>3</sub>)<sub>3</sub>], and 0.06 [s, 6H, Si(CH<sub>3</sub>)<sub>2</sub>].

<sup>13</sup>C NMR (125 MHz, CDCl<sub>3</sub>): δ 154.9, 129.9, 129.1, 128.2, 122.1, 112.6, 83.1, 79.6, 74.4, 72.7, 70.1, 65.5, 61.3, 60.8, 57.1, 26.0, 23.8, 18.4, and -5.2.

IR (neat): 3433, 3294, 2953, 2930, 2857, 2259, 2221, 1601, 1489, 1458, 1253, 1220, 1106, 1019, 943, 838, 780, and 754 cm<sup>-1</sup>.

HRMS (ESI-TOF): Calcd for C<sub>22</sub>H<sub>28</sub>NaO<sub>3</sub>Si<sup>+</sup> [M+Na<sup>+</sup>] requires 391.1700; found 391.1691.

TLC: R<sub>f</sub> 0.4 (4:1 Hex/EtOAc).

### 1-(2-((7-((*tert*-Butyldimethylsilyl)oxy)hepta-2,4-diyn-1-yl)oxy)phenyl)prop-2-yn-1-one (**S27**)

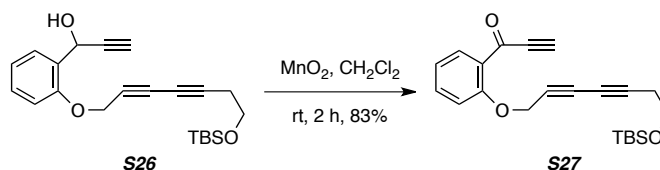

MnO<sub>2</sub> (532 mg, 6.1 mmol) was added to a solution of alcohol **S26** (90 mg, 0.24 mmol) in CH<sub>2</sub>Cl<sub>2</sub> (2 mL) and the black heterogeneous mixture was vigorously stirred at rt. After 2 h the reaction mixture was filtered through a plug of silica gel (CH<sub>2</sub>Cl<sub>2</sub> eluent) and concentrated. Purification by flash chromatography (hexanes:EtOAc 9:1) gave the triynone **S27** (74 mg, 0.20 mmol, 83%) as a clear yellow oil.

<sup>1</sup>H NMR (500 MHz, CDCl<sub>3</sub>): δ 8.04 (dd, *J* = 1.8, 7.8 Hz, 1H, *H6*), 7.56 (ddd, *J* = 1.8, 7.3, 8.4 Hz, 1H, *H4*), 7.12 (br d, *J* = 8.5 Hz, 1H, *H3*), 7.09 (br dd, *J* = 7.5, 7.5 Hz, 1H, *H5*), 4.88 (t, *J* = 1.0 Hz, 2H, C<sub>Ar</sub>OCH<sub>2</sub>), 3.73 (t, *J* = 7.9 Hz, 2H, CH<sub>2</sub>OSi), 3.40 (s, 1H, ≡CH), 2.48 (tt, *J* = 1.0, 6.0 Hz, 2H, CH<sub>2</sub>CH<sub>2</sub>OSi), 0.88 [s, 9H, SiC(CH<sub>3</sub>)<sub>3</sub>], and 0.06 [s, 6H, Si(CH<sub>3</sub>)<sub>2</sub>].

<sup>13</sup>C NMR (125 MHz, CDCl<sub>3</sub>): δ 175.9, 157.9, 135.3, 133.0, 126.8, 121.6, 114.4, 82.4, 79.8, 79.6, 73.1, 69.8, 65.5, 61.3, 57.3, 26.0, 23.8, 18.4, and -5.2.

IR (neat): 2953, 2929, 2856, 2258, 2093, 1654, 1597, 1483, 1453, 1292, 1256, 1220, 1105, 1009, 990, 839, 779, and 755 cm<sup>-1</sup>.

HRMS (ESI-TOF): Calcd for C<sub>22</sub>H<sub>26</sub>NaO<sub>3</sub>Si<sup>+</sup> [M+Na<sup>+</sup>] requires 389.1543; found 389.1553.

TLC: R<sub>f</sub> 0.4 (9:1 Hex/EtOAc).

### 12-(*tert*-Butyldimethylsilyl)-2,3-dihydrobenzo[6,7]oxepino[4,3-*f*]benzofuran-5(11*H*)-one (**S28**, entry 8, Fig. 3 of manuscript)

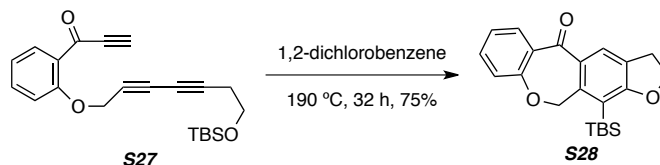

A solution of triynone **S27** (20 mg, 0.055 mmol) in 1,2-dichlorobenzene (3 mL) was heated to 195 °C (external bath temperature) in a sealed tube. After 32 h the reaction mixture was directly subjected (or subjected directly) to flash chromatography (hexanes:EtOAc 9:1) to give the tetracycle **S28** (15 mg, 0.041 mmol, 75%) as a clear yellow oil.

**<sup>1</sup>H NMR** (500 MHz, CDCl<sub>3</sub>): δ 8.16 (dd, *J* = 1.8, 8.1 Hz, 1H, *H6*), 7.66 (t, *J* = 1.3, Hz, 1H, *H4*), 7.44 (ddd, *J* = 1.8, 6.9, 8.5 Hz, 1H, *H8*), 7.06 (ddd, *J* = 1.3, 6.9, 8.2 Hz, 1H, *H7*), 7.02 (dd, *J* = 1.3, 8.3 Hz, 1H, *H9*), 5.20 (s, 2H, OCH<sub>2</sub>C<sub>Ar</sub>), 4.54 (t, *J* = 8.8 Hz, 2H, CH<sub>2</sub>CH<sub>2</sub>O), 3.18 (t, *J* = 1.4, 8.8 Hz, 2H, CH<sub>2</sub>CH<sub>2</sub>O), 0.95 [s, 9H, SiC(CH<sub>3</sub>)<sub>3</sub>], and 0.48 [s, 6H, Si(CH<sub>3</sub>)<sub>2</sub>].

**<sup>13</sup>C NMR** (125 MHz, CDCl<sub>3</sub>): δ 192.1, 170.0, 161.6, 141.8, 136.4, 135.0, 131.7, 127.3, 127.2, 125.6, 121.5, 120.2, 116.3, 72.3, 71.0, 29.0, 26.9, 18.2, and -1.1.

**IR** (neat): 2953, 2928, 2856, 1641, 1600, 1474, 1448, 1409, 1294, 1250, 1108, 1033, 1008, and 880 cm<sup>-1</sup>.

**HRMS** (ESI-TOF): Calcd for C<sub>22</sub>H<sub>27</sub>O<sub>3</sub>Si<sup>+</sup> [M+H<sup>+</sup>] requires 367.1724; found 367.1723.

**TLC**: R<sub>f</sub> 0.5 (9:1 Hex/EtOAc).

### Synthesis of fluorenone **S32** (Fig. 3, entry 9 of manuscript)

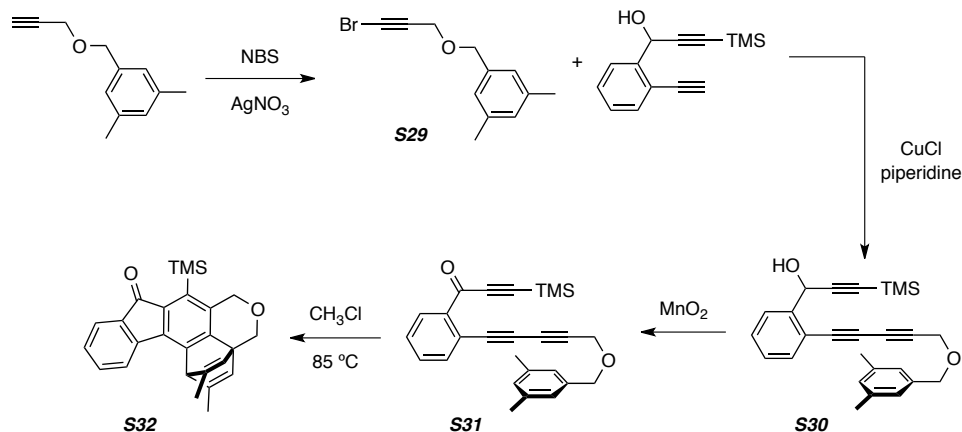

### 1-(((3-Bromoprop-2-yn-1-yl)oxy)methyl)-3,5-dimethylbenzene (**S29**)

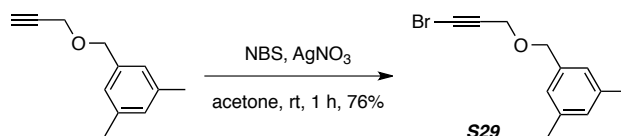

Bromoalkyne **S29** was prepared following general procedure A from 1,3-dimethyl-5-((prop-2-yn-1-yloxy)methyl)benzene (150 mg, 0.86 mmol), *N*-bromosuccinimide (NBS, 170 mg, 0.96 mmol), AgNO<sub>3</sub> (17 mg, 0.10 mmol), and acetone (10 mL). Purification by flash chromatography (hexanes:EtOAc 12:1) gave bromoalkyne **S29** (166 mg, 0.66 mmol, 76%) as a pale yellow oil.

<sup>1</sup>H NMR (500 MHz, CDCl<sub>3</sub>): δ 6.96 (br s, 2H, ArH<sub>2</sub>,H<sub>6</sub>), 6.94 (br s, 1H, ArH<sub>4</sub>), 4.52 (s, 2H, OCH<sub>2</sub>C≡C), 4.19 (t, *J* = 0.8 Hz, 2H, ArCH<sub>2</sub>), and 2.31 [br s, 6H, Ar(CH<sub>3</sub>)<sub>2</sub>].

<sup>13</sup>C NMR (125 MHz, CDCl<sub>3</sub>): δ 138.2, 137.2, 129.7, 126.1, 76.5, 72.0, 58.2, 46.1, and 21.4.

IR (neat): 3015, 2918, 2854, 2213, 1608, 1463, 1380, 1351, 1160, 1088, 1036, and 844 cm<sup>-1</sup>.

HRMS (ESI-TOF): Calcd for C<sub>12</sub>H<sub>13</sub>NaOBr<sup>+</sup> [M+Na<sup>+</sup>] requires 275.0042; found 275.0066.

### 1-(2-(5-((3,5-Dimethylbenzyl)oxy)penta-1,3-diyn-1-yl)phenyl)-3-(trimethylsilyl)prop-2-yn-1-ol (**S30**)

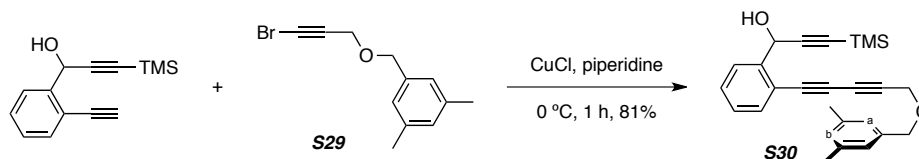

Triyne **S30** was prepared following general procedure B from 1-(2-ethynylphenyl)-3-(trimethylsilyl)prop-2-yn-1-ol<sup>15</sup> (82 mg, 0.36 mmol), bromoalkyne **S29** (95 mg, 0.38 mmol), CuCl (4 mg, 0.04 mmol), and piperidine (1 mL). Purification by gradient flash chromatography (hexanes:EtOAc 12:1 to 8:1) gave the triyne **S30** (117 mg, 0.29 mmol, 81%) as a clear yellow oil.

<sup>1</sup>H NMR (500 MHz, CDCl<sub>3</sub>): δ 7.72 (dd, *J* = 7.8, 1.5 Hz, 1H, H<sub>3</sub>), 7.53 (dd, *J* = 7.7, 1.5 Hz, 1H, H<sub>6</sub>), 7.42 (ddd, *J* = 7.6, 7.6, 1.4 Hz, 1H, H<sub>5</sub>), 7.30 (ddd, *J* = 7.6, 7.6, 1.3 Hz, 1H, H<sub>4</sub>), 6.99 (br s, 2H,

ArH<sub>a</sub>), 6.95 (br s, 1H, ArH<sub>b</sub>), 5.83 (d, *J* = 5.7 Hz, 1H, ArCH), 4.57 (br s, 2H, OCH<sub>2</sub>C≡C), 4.33 (br s, 2H, ArCH<sub>2</sub>), 2.42 (d, *J* = 5.7 Hz, 1H, OH), 2.33 [br s, 6H, Ar(CH<sub>3</sub>)<sub>2</sub>], and 0.20 (s, 9H, SiCH<sub>3</sub>).

<sup>13</sup>C NMR (125 MHz, CDCl<sub>3</sub>): δ 143.7, 138.2, 137.1, 133.9, 130.0, 129.8, 128.5, 127.1, 126.2, 120.2, 104.1, 92.1, 80.6, 78.7, 75.3, 72.1, 71.0, 63.5, 57.9, 21.4, and 0.04.

IR (neat): 3417, 3017, 2957, 2920, 2856, 2237, 2173, 1607, 1450, 1351, 1250, 1085, 1056, 1040, 984, and 845 cm<sup>-1</sup>.

HRMS (ESI-TOF): Calcd for C<sub>26</sub>H<sub>28</sub>NaO<sub>2</sub>Si<sup>+</sup> [M+Na<sup>+</sup>] requires 423.1751; found 423.1744.

### 1-(2-(5-((3,5-Dimethylbenzyl)oxy)penta-1,3-diyne-1-yl)phenyl)-3-(trimethylsilyl)prop-2-yn-1-one (S31)

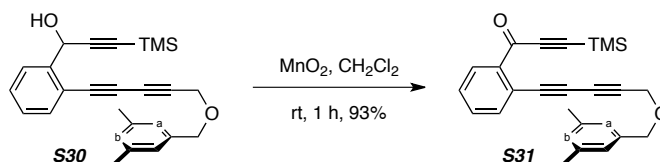

MnO<sub>2</sub> (380 mg, 4.37 mmol) was added to a stirred solution of alcohol **S30** (117 mg, 0.29 mmol) in CH<sub>2</sub>Cl<sub>2</sub> (3 mL) at room temperature. After 1 h the reaction mixture was filtered through a plug of Celite<sup>®</sup> (CH<sub>2</sub>Cl<sub>2</sub>) and concentrated to give the triyne **S31** (108 mg, 0.27 mmol, 93%) as a pale yellow oil.

<sup>1</sup>H NMR (500 MHz, CDCl<sub>3</sub>): δ 8.12 (dd, *J* = 7.6, 1.7 Hz, 1H, H<sub>6</sub>), 7.64 (dd, *J* = 7.7, 1.4 Hz, 1H, H<sub>3</sub>), 7.52 (ddd, *J* = 7.5, 7.5, 1.5 Hz, 1H, H<sub>4</sub>), 7.48 (ddd, *J* = 7.6, 7.6, 1.4 Hz, 1H, H<sub>5</sub>), 6.99 (br s, 2H, ArH<sub>a</sub>), 6.94 (br s, 1H, ArH<sub>b</sub>), 4.56 (br s, 2H, OCH<sub>2</sub>C≡C), 4.33 (br s, 2H, ArCH<sub>2</sub>O), 2.32 [br s, 6H, Ar(CH<sub>3</sub>)<sub>2</sub>], and 0.31 (s, 9H, SiCH<sub>3</sub>).

<sup>13</sup>C NMR (125 MHz, CDCl<sub>3</sub>): δ 176.5, 139.2, 138.2, 137.1, 135.9, 132.7, 132.1, 129.8, 129.0, 126.2, 121.5, 101.6, 101.4, 81.2, 79.4, 76.2, 72.1, 71.5, 57.9, 21.4, and 0.6.

IR (neat): 2959, 2918, 2852, 2238, 2152, 1706, 1647, 1607, 1590, 1561, 1480, 1467, 1351, 1236, 1096, 1076, 1014, and 848 cm<sup>-1</sup>.

HRMS (ESI-TOF): Calcd for C<sub>26</sub>H<sub>26</sub>NaO<sub>2</sub>Si<sup>+</sup> [M+Na<sup>+</sup>] requires 421.1594; found 421.1599.

### (1*r*,3*ar*)-2,14-Dimethyl-7-(trimethylsilyl)-4,6-dihydro-1,3*a*-ethenobenzo[*de*]indeno[1,2-*g*]isochromen-8(1*H*)-one (S32, entry 9, Fig. 3 of manuscript)

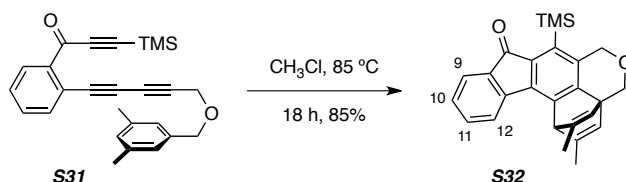

A solution of ketone **S31** (20 mg, 0.050 mmol) in CHCl<sub>3</sub> (4 mL) was heated to 85 °C (external bath temperature) in a sealed tube. After 16 h the reaction mixture was concentrated and purified by flash chromatography (hexanes:EtOAc 12:1) to give the polycyclic ketone **S32** (17 mg, 0.043, 85%) as a bright yellow oil.

<sup>1</sup>H NMR (500 MHz, CDCl<sub>3</sub>): δ 7.90 (d, *J* = 7.5 Hz, 1H, H<sub>12</sub>), 7.63 (d, *J* = 7.0 Hz, 1H, H<sub>9</sub>), 7.51 (dd, *J* = 7.5, 7.5 Hz, 1H, H<sub>11</sub>), 7.28 (dd, *J* = 7.5, 7.5 Hz, 1H, H<sub>10</sub>), 6.16 (br s, 2H, MeC=CH), 4.96 (s, 1H, HCR<sub>3</sub>), 4.79 (br s, 2H, OCH<sub>2</sub>C<sub>Ar</sub>), 4.39 (br s, 2H, OCH<sub>2</sub>CR<sub>3</sub>), 1.99 (br s, 6H, CCH<sub>3</sub>), and 0.36 (s, 9H, SiCH<sub>3</sub>).



**$^{13}\text{C}$  NMR** (125 MHz,  $\text{CDCl}_3$ ):  $\delta$  194.3, 149.8, 148.8, 144.6, 142.4, 136.3, 136.0, 135.5, 135.1, 135.0, 134.4, 133.7, 128.3, 124.2, 121.8, 71.2, 70.4, 56.2, 51.2, 20.0, and 2.3.

**IR** (neat): 2950, 2903, 2849, 1705, 1606, 1560, 1466, 1375, 1353, 1205, 1189, 1174, 1122, 1097, 995, and  $942\text{ cm}^{-1}$ .

**HRMS** (ESI-TOF): Calcd for  $\text{C}_{26}\text{H}_{26}\text{NaO}_2\text{Si}^+$  [ $\text{M}+\text{Na}^+$ ] requires 421.1594; found 421.1559.

### Synthesis of fluorenone **S36** (Fig. 3, entry 10 of manuscript)

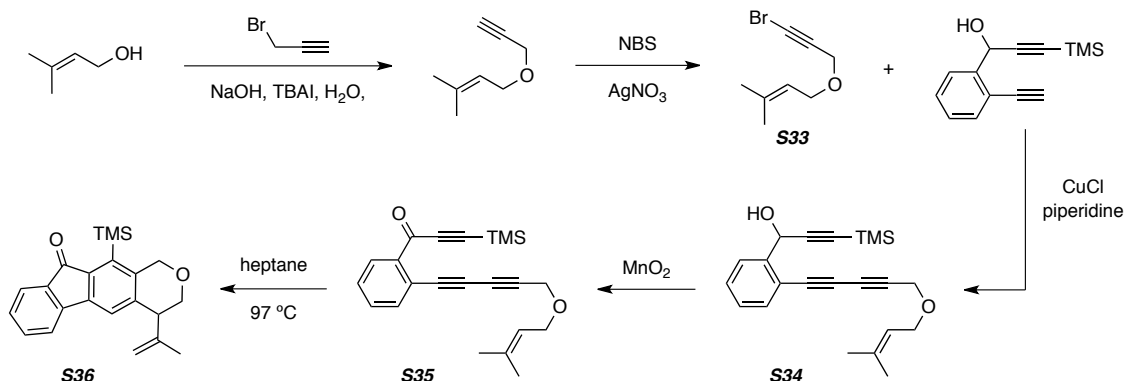

### 3-Methyl-1-(prop-2-yn-1-yloxy)but-2-ene

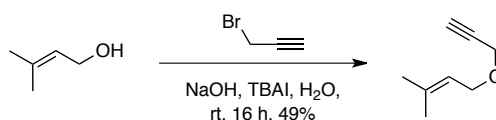

Propargyl bromide (3.00 mL, 26.9 mmol, 80 wt. % in toluene) was added dropwise to an aqueous (7.2 mL) solution of 3-methylbut-2-en-1-ol (2.95 mL, 34.2 mmol), tetra-*n*-butylammonium iodide (126 mg, 341 mmol), and sodium hydroxide (4.1 g, 103 mmol) at room temperature with stirring. After 16 h the reaction mixture was extracted with Et<sub>2</sub>O. The combined organic layers were washed with brine, dried (MgSO<sub>4</sub>), and concentrated. Purification by vacuum distillation gave the product ether as a clear colorless oil (2.07 g, 16.7 mmol, 49%). The spectra data were entirely consistent with literature values.<sup>16</sup>

### 1-((3-Bromoprop-2-yn-1-yl)oxy)-3-methylbut-2-ene (**S33**)

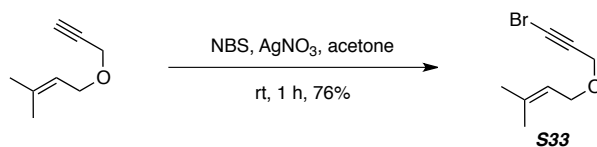

Bromoalkyne **S33** was prepared following general procedure A from 3-methyl-1-(prop-2-yn-1-yloxy)but-2-ene (2.07 g, 16.7 mmol), *N*-bromosuccinimide (NBS, 3.35 g, 18.8 mmol), AgNO<sub>3</sub> (312 mg, 1.84 mmol), and acetone (40 mL). Purification by flash chromatography (hexanes:EtOAc 9:1) gave the bromoalkyne **S33** (2.56 g, 12.6 mmol, 76%) as a clear colorless oil.

<sup>1</sup>H NMR (500 MHz, CDCl<sub>3</sub>): δ 5.33 (tq, *J* = 7.1, 1.4, 1.4 Hz, 1H, =CH), 4.15 (s, 2H, OCH<sub>2</sub>C≡), 4.05 (dq, *J* = 7.1, 0.8, 0.8 Hz, 2H, OCH<sub>2</sub>CH=), 1.76 (dt, *J* = 1.2, 1.2 Hz, 3H, CH<sub>3</sub>), and 1.71 (br d, *J* = 1.5 Hz, 3H, CH<sub>3</sub>).

<sup>13</sup>C NMR (125 MHz, CDCl<sub>3</sub>): δ 138.7, 120.2, 76.7, 66.2, 57.9, 45.7, 25.9, and 18.2.

IR (neat): 2974, 2933, 2913, 2853, 2212, 1673, 1630, 1443, 1378, 1352, 1077, 1027, 1002, 925, and 897 cm<sup>-1</sup>.

HRMS (CIMS): Calcd for C<sub>8</sub>H<sub>15</sub>BrNO<sup>+</sup> [M+NH<sub>4</sub><sup>+</sup>] requires 220.0332; found 220.0348.

TLC: R<sub>f</sub> 0.4 (19:1 Hex/EtOAc).

### 1-(2-(5-((3-Methylbut-2-en-1-yl)oxy)penta-1,3-diyn-1-yl)phenyl)-3-(trimethylsilyl)prop-2-yn-1-ol (S34)

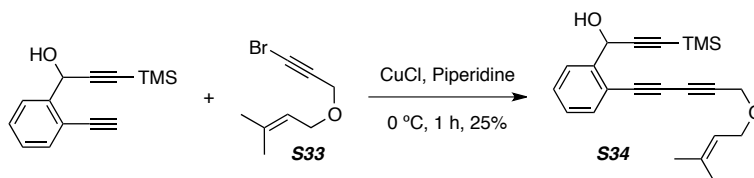

Triyne **S34** was prepared following general procedure B from 1-(2-ethynylphenyl)-3-(trimethylsilyl)prop-2-yn-1-ol<sup>15</sup> (108 mg, 0.474 mmol), bromoalkyne **S33** (123 mg, 0.606 mmol), CuCl (3 mg, 0.03 mmol), and piperidine (1.0 mL). Purification by MPLC (hexanes:EtOAc 4:1) gave the triyne **S34** (42 mg, 0.12 mmol, 25%) as a clear yellow oil.

<sup>1</sup>H NMR (500 MHz, CDCl<sub>3</sub>): δ 7.71 (dd, *J* = 1.3, 7.8 Hz, 1H, *H3*), 7.52 (dd, *J* = 1.5, 7.7 Hz, 1H, *H6*), 7.42 (ddd, *J* = 1.5, 7.7, 7.7 Hz, 1H, *H4or5*), 7.30 (ddd, *J* = 1.4, 7.6, 7.6 Hz, 1H, *H4or5*), 5.82 [d, *J* = 4.9 Hz, 1H, CH(OH)], 5.35 [tq, *J* = 7.1, 1.4, 1.4 Hz, 1H, (CH<sub>3</sub>)<sub>2</sub>C=CH], 4.29 (s, 2H, OCH<sub>2</sub>C≡), 4.09 (dq, *J* = 7.1, 0.8, 0.8 Hz, 2H, OCH<sub>2</sub>CH=), 2.48 (d, *J* = 5.2 Hz, 1H, OH), 1.78 (dt, *J* = 1.2, 1.2 Hz, 3H, CCH<sub>3</sub>), 1.73 (br d, *J* = 1.6 Hz, 3H, CCH<sub>3</sub>), and 0.20 (s, 9H, SiCH<sub>3</sub>).

<sup>13</sup>C NMR (125 MHz, CDCl<sub>3</sub>): δ 143.6, 138.9, 133.8, 129.9, 128.5, 127.1, 120.2, 120.1, 104.1, 92.0, 80.9, 78.7, 75.1, 70.6, 66.4, 63.4, 57.6, 26.0, 18.3, and -0.1.

IR (neat): 3437, 2960, 2238, 2172, 1250, 1059, 845, and 760 cm<sup>-1</sup>.

HRMS (ESI-TOF): Calcd for C<sub>22</sub>H<sub>26</sub>NaO<sub>2</sub>Si<sup>+</sup> [M+Na<sup>+</sup>] requires 373.1594; found 373.1604.

TLC: R<sub>f</sub> 0.4 (4:1 Hex/EtOAc).

### 1-(2-(5-((3-Methylbut-2-en-1-yl)oxy)penta-1,3-diyn-1-yl)phenyl)-3-(trimethylsilyl)prop-2-yn-1-one (S35)

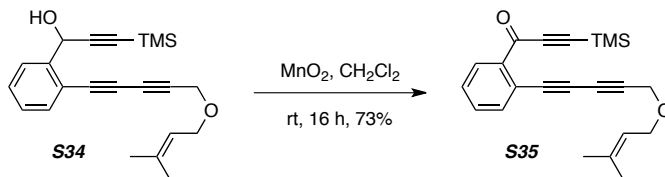

MnO<sub>2</sub> (230 mg, 2.64 mmol) was added to a solution of alcohol **S34** (37 mg, 0.11 mmol) in CH<sub>2</sub>Cl<sub>2</sub> (0.25 mL). After 16 h the reaction mixture was filtered through a plug of Celite<sup>®</sup> (EtOAc eluent) and concentrated to give the ketone **S35** (28 mg, 0.080 mmol, 73%) as a clear amber oil.

<sup>1</sup>H NMR (500 MHz, CDCl<sub>3</sub>): δ 8.11 (dd, *J* = 1.6, 7.7 Hz, 1H, *H6*), 7.63 (dd, *J* = 1.6, 7.6 Hz, 1H, *H3*), 7.52 (ddd, *J* = 1.6, 7.5, 7.5 Hz, 1H, *H4*), 7.48 (ddd, *J* = 1.5, 7.6, 7.6 Hz, 1H, *H5*), 5.34 (tq, *J* = 7.1, 1.5, 1.5 Hz, 1H, (CH<sub>3</sub>)<sub>2</sub>C=CH), 4.29 (s, 2H, OCH<sub>2</sub>C≡), 4.09 (br d, *J* = 7.1 Hz, 2H, OCH<sub>2</sub>CH=), 1.77 (dt, *J* = 1.2, 1.2 Hz, 3H, CCH<sub>3</sub>), 1.73 (d, *J* = 1.4 Hz, 3H, CCH<sub>3</sub>), and 0.31 (s, 9H, SiCH<sub>3</sub>).

<sup>13</sup>C NMR (125 MHz, CDCl<sub>3</sub>): δ 176.4, 139.1, 138.8, 135.9, 132.7, 132.1, 128.9, 121.5, 120.2, 101.6, 101.4, 81.6, 79.5, 76.0, 71.1, 66.4, 57.7, 26.0, 18.3, and -0.6.

IR (neat): 2965, 2931, 2872, 2152, 1649, 1236, 1067, 1015, 850, and 757 cm<sup>-1</sup>.

HRMS (ESI-TOF): Calcd for C<sub>22</sub>H<sub>24</sub>NaO<sub>2</sub>Si<sup>+</sup> [M+Na<sup>+</sup>] requires 371.1438; found 371.1436.

TLC: R<sub>f</sub> 0.4 (9:1 Hex/EtOAc).

**4-(Propen-2-yl)-11-(trimethylsilyl)-3,4-dihydroindeno[1,2-g]isochromen-10(1H)-one (S36, entry 10, Fig. 3 of manuscript)**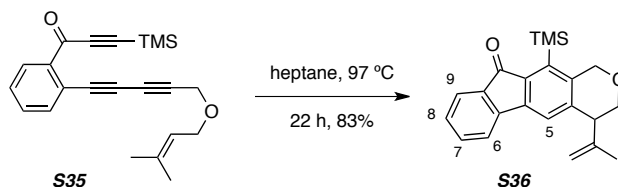

A solution of triynone **S35** (53 mg, 0.15 mmol) in heptane (4 mL) was heated at 97 °C. After 16 h the mixture was concentrated and the crude material was purified by flash chromatography (hexanes:EtOAc 15:1) to give the fluorenone **S36** (44 mg, 0.13 mmol, 83%) as a golden yellow oil.

**<sup>1</sup>H NMR** (500 MHz, CDCl<sub>3</sub>): δ 7.59 (ddd, *J* = 1.0, 1.0, 7.3 Hz, 1H, *H*<sub>9</sub>), 7.48 (ddd, *J* = 0.8, 1.5, 7.4 Hz, 1H, *H*<sub>6</sub>), 7.45 (ddd, *J* = 1.1, 7.2, 7.2 Hz, 1H, *H*<sub>7</sub>), 7.33 (d, *J* = 0.8 Hz, 1H, *H*<sub>5</sub>), 7.26 (ddd, *J* = 1.5, 7.2, 7.2 Hz, 1H, *H*<sub>8</sub>), 5.03 (br dq, *J* = 0.8, 1.5 Hz, 1H, =CH<sub>a</sub>H<sub>b</sub>), 4.91 (ddq, *J* = 0.8, 2.1, 0.8 Hz, 1H, =CH<sub>a</sub>H<sub>b</sub>), 4.90 (dd, *J* = 1.2, 15.2 Hz, C<sub>Ar</sub>CH<sub>a</sub>H<sub>b</sub>O), 4.85 (dd, *J* = 1.2, 15.2 Hz, C<sub>Ar</sub>CH<sub>a</sub>H<sub>b</sub>O), 3.97 (dd, *J* = 5.5, 11.3 Hz, OCH<sub>a</sub>H<sub>b</sub>CH), 3.84 (dd, *J* = 6.0, 11.3 Hz, OCH<sub>a</sub>H<sub>b</sub>CH), 3.63 (dddq, *J* = 0.8, 5.5, 6.0, 0.8 Hz, 1H, CHCH<sub>2</sub>O), 1.73 (dd, *J* = 0.8, 1.5 Hz, 3H, CCH<sub>3</sub>), and 0.43 (s, 9H, SiCH<sub>3</sub>).

**<sup>13</sup>C NMR** (125 MHz, CDCl<sub>3</sub>): δ 195.1, 145.9, 144.0, 143.1, 142.2, 140.5, 139.0, 138.4, 134.6, 134.2, 128.9, 124.0, 122.1, 119.8, 115.5, 71.2, 68.3, 47.8, 20.3, and 2.7.

**IR** (neat): 2974, 2933, 2913, 2853, 2212, 1673, 1630, 1443, 1378, 1352, 1077, 1027, 1002, 925, and 897 cm<sup>-1</sup>.

**HRMS** (CIMS): Calcd for C<sub>22</sub>H<sub>25</sub>O<sub>2</sub>Si<sup>+</sup> [M+H<sup>+</sup>] requires 349.1618; found 349.1629.

**TLC**: R<sub>f</sub> 0.4 (9:1 Hex/EtOAc).

### Synthesis of triyne **23** (Figure 4A of manuscript)

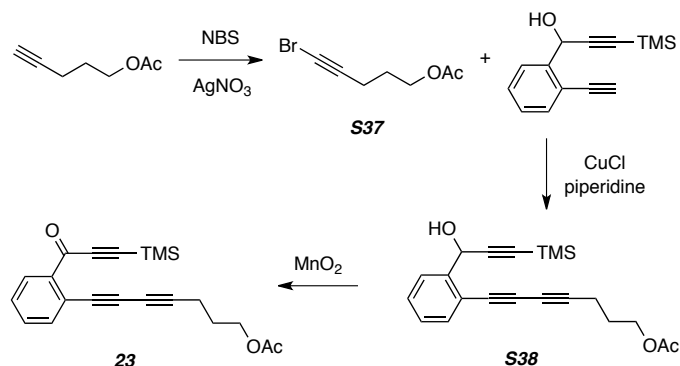

### 5-Bromopent-4-yn-1-yl Acetate (**S37**)

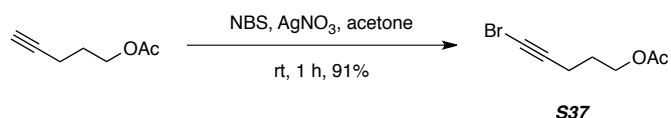

5-Bromopent-4-yn-1-yl acetate was prepared following general procedure A from pent-4-yn-1-yl acetate<sup>17</sup> (780 mg, 6.19 mmol), *N*-bromosuccinimide (NBS, 1.24 g, 6.97 mmol), AgNO<sub>3</sub> (108 mg, 0.64 mmol), and acetone (40 mL). Purification by flash chromatography (hexanes:EtOAc 12:1) gave the bromoalkyne (1.30 g, 6.34 mmol, 91%) **S37** as a pale yellow oil.

<sup>1</sup>H NMR (500 MHz, CDCl<sub>3</sub>): δ 4.15 (t, *J* = 6.3 Hz, 2H, AcOCH<sub>2</sub>), 2.32 (t, *J* = 7.0 Hz, 2H, C≡CCH<sub>2</sub>), 2.06 (s, 3H, CH<sub>3</sub>CO), and 1.85 (tt, *J* = 7.0, 6.3 Hz, 2H, CH<sub>2</sub>CH<sub>2</sub>O).

<sup>13</sup>C NMR (125 MHz, CDCl<sub>3</sub>): δ 171.1, 79.0, 63.1, 38.8, 27.5, 21.0, and 16.7.

IR (neat): 2961, 2340, 1738, 1434, 1367, 1240, and 1044 cm<sup>-1</sup>.

HRMS (ESI-TOF): Calcd for C<sub>7</sub>H<sub>9</sub>AgBrO<sub>2</sub><sup>+</sup> [M+Ag<sup>+</sup>] requires 310.8831; found 310.8811.

### 7-(2-(1-Hydroxy-3-(trimethylsilyl)prop-2-yn-1-yl)phenyl)hepta-4,6-diyn-1-yl Acetate (**S38**)

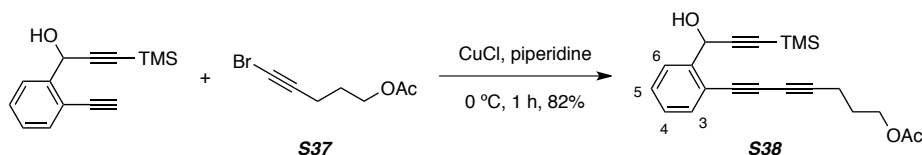

Triyne **S38** was prepared following general procedure B from 1-(2-ethynylphenyl)-3-(trimethylsilyl)prop-2-yn-1-ol<sup>15</sup> (200 mg, 0.88 mmol), bromoalkyne **S37** (200 mg, 0.98 mmol), CuCl (8 mg, 0.08 mmol), and piperidine (2.5 mL). Purification by flash chromatography (hexanes:EtOAc 5:1) gave the triyne **S38** (255 mg, 0.72 mmol, 82%) as a pale yellow oil. This compound is contaminated with ca. 15% bromoalkyne **S37** (<sup>1</sup>H NMR), which can be removed chromatographically in the subsequent step.

<sup>1</sup>H NMR (500 MHz, CDCl<sub>3</sub>): δ 7.70 (dd, *J* = 7.8, 1.4 Hz, 1H, ArH6), 7.50 (dd, *J* = 7.7, 1.0 Hz, 1H, ArH3), 7.40 (ddd, *J* = 7.7, 7.7, 1.3 Hz, 1H, ArH4/H5), 7.29 (ddd, *J* = 7.6, 7.6, 1.3 Hz, 1H, ArH4/H5), 5.82 (d, *J* = 5.7 Hz, 1H, ArCH), 4.19 (t, *J* = 6.2 Hz, 2H, AcOCH<sub>2</sub>), 2.51 (d, *J* = 5.8 Hz, 1H, OH), 2.49 (t, *J* = 7.3 Hz, 2H, C≡CCH<sub>2</sub>), 2.08 (s, 3H, CH<sub>3</sub>CO), 1.92 (tt, *J* = 7.0, 6.2 Hz, 2H, AcOCH<sub>2</sub>CH<sub>2</sub>), and 0.20 [s, 9H, Si(CH<sub>3</sub>)<sub>3</sub>].

$^{13}\text{C}$  NMR (125 MHz,  $\text{CDCl}_3$ ):  $\delta$  171.2, 143.5, 133.7, 129.6, 128.5, 127.1, 120.7, 104.2, 91.9, 84.6, 79.4, 72.3, 65.8, 63.5, 63.0, 27.4, 21.0, 16.7, and 0.05.

IR (neat): 3450, 2960, 2899, 2362, 2239, 2172, 1738, 1480, 1448, 1425, 1390, 1367, 1247, 1041, 984, 955, and  $848\text{ cm}^{-1}$ .

HRMS (ESI-TOF): Calcd for  $\text{C}_{21}\text{H}_{24}\text{NaO}_3\text{Si}^+$  [ $\text{M}+\text{Na}^+$ ] requires 375.1392; found 375.1389.

### 7-(2-(3-(Trimethylsilyl)propioloyl)phenyl)hepta-4,6-diyne-1-yl Acetate (**23**, Fig. 4A)

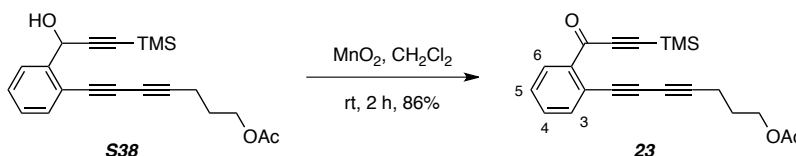

$\text{MnO}_2$  (400 mg, 4.60 mmol) was added to a stirred solution of triyne **S38** (105 mg, 0.298 mmol) in  $\text{CH}_2\text{Cl}_2$  (3 mL) at room temperature. After 2 h the reaction mixture was filtered through a plug of Celite<sup>®</sup> ( $\text{CH}_2\text{Cl}_2$  eluent) and concentrated. Purification by flash chromatography (hexanes:EtOAc 12:1) gave the ketone **23** (90 mg, 0.26 mmol, 86%) as a clear amber oil.

$^1\text{H}$  NMR (500 MHz,  $\text{CDCl}_3$ ):  $\delta$  8.09 (d,  $J = 7.7$  Hz, 1H,  $H_6$ ), 7.60 (d,  $J = 7.6$  Hz, 1H,  $H_3$ ), 7.50 (dd,  $J = 7.5, 7.5$  Hz,  $H_4$ ), 7.44 (dd,  $J = 7.6, 7.6$  Hz, 1H,  $H_5$ ), 4.18 (t,  $J = 6.2$  Hz, 2H,  $\text{AcOCH}_2$ ), 2.49 (t,  $J = 7.0$  Hz, 2H,  $\text{ArCH}_2$ ), 2.07 (s, 3H,  $\text{CH}_3\text{CO}$ ), 1.91 (tt,  $J = 6.6, 6.6$  Hz, 2H,  $\text{ArCH}_2\text{CH}_2$ ), and 0.30 (s, 9H,  $\text{SiCH}_3$ ).

$^{13}\text{C}$  NMR (125 MHz,  $\text{CDCl}_3$ ):  $\delta$  176.6, 171.1, 139.1, 135.8, 132.6, 132.0, 128.6, 122.0, 101.5, 101.4, 85.4, 80.4, 73.3, 66.4, 63.1, 27.5, 21.1, 16.8, and 0.6.

IR (neat): 2961, 2900, 2240, 2152, 1739, 1648, 1589, 1560, 1479, 1366, 1235, 1044, 1015, 955, and  $850\text{ cm}^{-1}$ .

HRMS (ESI-TOF): Calcd for  $\text{C}_{21}\text{H}_{22}\text{NaO}_3\text{Si}^+$  [ $\text{M}+\text{Na}^+$ ] requires 373.1230; found 373.1206.

### 3-(7-Oxo-6-(trimethylsilyl)-4,7-dihydro-1H-1,4-ethenobenzo[*c*]fluoren-5-yl)propyl Acetate (**25a**, Fig. 4A of manuscript)

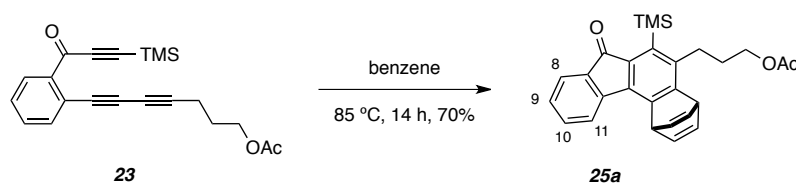

A solution of triyne **23** (20 mg, 0.057 mmol) in benzene (5.5 mL) was heated at  $85\text{ }^\circ\text{C}$  (external bath temperature) in a sealed tube. After 14 h the reaction mixture was concentrated and purified by flash chromatography (12:1) to give fluorenone **25a** (17 mg, 0.040 mmol, 70%) as a bright yellow oil.

$^1\text{H}$  NMR (500 MHz,  $\text{CDCl}_3$ ):  $\delta$  7.93 (ddd,  $J = 7.7, 0.9, 0.9$  Hz, 1H,  $H_{11}$ ), 7.60 (ddd,  $J = 7.3, 1.3, 0.7$  Hz, 1H,  $H_8$ ), 7.49 (ddd,  $J = 7.6, 7.6, 1.3$  Hz, 1H,  $H_{10}$ ), 7.25 (ddd,  $J = 7.4, 7.4, 0.9$  Hz, 1H,  $H_9$ ), 6.94 (ddd,  $J = 6.5, 6.5, 1.6$  Hz, 2H,  $\text{CH}_a=\text{CH}_b$ ), 6.88 (ddd,  $J = 6.0, 6.0, 1.6$  Hz, 2H,  $\text{CH}_a=\text{CH}_b$ ), 5.71 (dddd,  $J = 5.9, 5.9, 1.7, 1.7$  Hz, 1H,  $\text{C}^{\text{sp}^3}\text{HCH}=\text{CHC}^{\text{sp}^3}\text{H}$ ), 5.24 (dddd,  $J = 5.9, 5.9, 1.6, 1.6$  Hz, 1H,  $\text{C}^{\text{sp}^3}\text{HCH}=\text{CHC}^{\text{sp}^3}\text{H}$ ), 4.16 (t,  $J = 6.5$  Hz, 2H,  $\text{AcOCH}_2$ ), 3.05-3.01 (br t,  $J = 8.2$  Hz, 2H,  $\text{ArCH}_2$ ), 2.12 (s, 3H,  $\text{CH}_3\text{CO}$ ), 1.83-1.76 (br tt,  $\Sigma J_s = 29$  Hz, 2H,  $\text{ArCH}_2\text{CH}_2$ ), and 0.41 (s, 9H,  $\text{SiCH}_3$ ).

$^{13}\text{C}$  NMR (125 MHz,  $\text{CDCl}_3$ ):  $\delta$  194.5, 171.3, 152.1, 144.3, 143.0, 140.7, 139.1, 138.9, 138.4, 136.8, 135.3, 135.1, 134.2, 128.2, 124.1, 122.3, 64.0, 46.0, 45.2, 32.0, 28.4, 21.2, and 3.2.

**IR** (neat): 3065, 2951, 2897, 1738, 1705, 1607, 1586, 1550, 1467, 1387, 1365, 1326, 1301, 1244, 1043, and 857  $\text{cm}^{-1}$ .

**HRMS** (ESI-TOF): Calcd for  $\text{C}_{27}\text{H}_{28}\text{NaO}_3\text{Si}^+$  [ $\text{M}+\text{Na}^+$ ] requires 451.1700; found 451.1724.

**3-((1*R*\*,4*S*\*,4*aR*\*,11*dS*\*)-7-Oxo-6-(trimethylsilyl)-2,3,4,4*a*,7,11*d*-hexahydro-1*H*-1,4-methanobenzo[3,4]cyclobuta[1,2-*c*]fluoren-5-yl)propyl Acetate (**25b**, Fig. 4A of manuscript)**

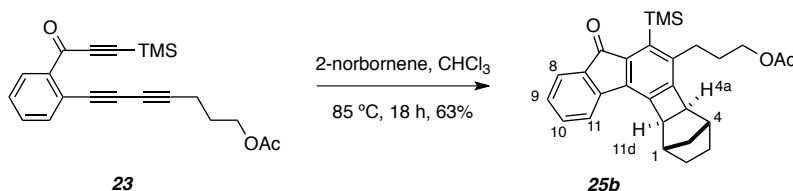

A solution of triyne **23** (20 mg, 0.057 mmol) and 2-norbornene (83 mg, 0.88 mmol) in ethanol-free  $\text{CHCl}_3$  (5 mL) was heated at 85 °C (external bath temperature) in a sealed tube. After 18 h the reaction mixture was concentrated and purified by flash chromatography (12:1) to give fluorenone **25b** (16 mg, 0.036 mmol, 63%) as a bright yellow oil, which is assigned as the endo adduct on the basis of comparative spectral data for the known exo and endo adducts of *o*-benzyne and norbornene.<sup>18</sup> No evidence was seen for the formation of a second diastereomer.

**<sup>1</sup>H NMR** (500 MHz,  $\text{CDCl}_3$ ):  $\delta$  7.56 (ddd,  $J = 7.3, 1.0, 1.0$  Hz, 1H, *H*8), 7.41 (ddd,  $J = 7.4, 7.4, 1.1$  Hz, 1H, *H*10), 7.32 (ddd,  $J = 7.4, 1.0, 1.0$  Hz, 1H, *H*11), 7.22 (ddd,  $J = 7.4, 7.4, 1.0$  Hz, 1H, *H*9), 4.122 (dt,  $J = 11.0, 6.5$  Hz, 1H,  $\text{CH}_a\text{H}_b\text{OAc}$ ), 4.116 (dt,  $J = 11.0, 6.6$  Hz, 1H,  $\text{CH}_a\text{H}_b\text{OAc}$ ), 3.31 [dd,  $J = 4.0, 1.0$  Hz, 1H, *H*4*a* (or *H*11*d*)], 3.29 [dd,  $J = 4.0, 1.0$  Hz, 1H, *H*11*d* (or *H*4*a*)], 2.71 (br t,  $J = 8.0$  Hz, 2H,  $\text{ArCH}_2$ ), 2.47 (br s, 1H, *H*1), 2.37 (br s, 1H, *H*4), 2.08 (s, 3H,  $\text{CCH}_3$ ), 1.88-1.72 (m, 2H,  $\text{AcOCH}_2\text{CH}_2$ ), 1.72-1.62 (m, 2H), 1.31-1.22 (m, 2H), 1.10 (br s, 2H), and 0.42 (s, 9H,  $\text{SiCH}_3$ ).

**<sup>13</sup>C NMR** (125 MHz,  $\text{CDCl}_3$ ):  $\delta$  195.4, 171.2, 152.4, 143.1, 142.0, 140.7, 140.4, 140.3, 137.5, 134.6, 134.3, 128.6, 124.0, 121.5, 64.2, 52.1, 48.6, 36.5, 35.9, 32.7, 32.0, 28.0, 27.8, 27.7, 21.1, and 2.7.

**IR** (neat): 2948, 2872, 1740, 1708, 1605, 1571, 1464, 1386, 1364, 1293, 1237, 1182, 1173, 1079, 1042, 997, 998, 950, and 917  $\text{cm}^{-1}$ .

**HRMS** (ESI-TOF): Calcd for  $\text{C}_{28}\text{H}_{32}\text{NaO}_3\text{Si}^+$  [ $\text{M}+\text{Na}^+$ ] requires 467.2013; found 467.2027.

**3-(9-Oxo-3-(*N*-phenylacetamido)-1-(trimethylsilyl)-9*H*-fluoren-2-yl)propyl Acetate (**25c**, Fig. 4A of manuscript)**

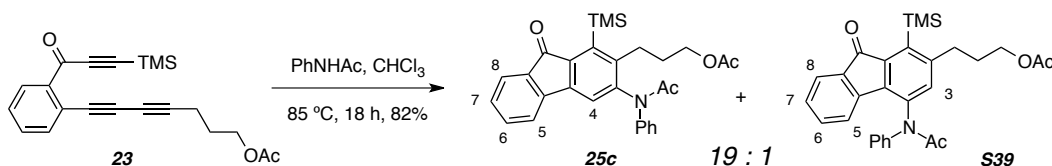

A solution of triyne **23** (20 mg, 0.057 mmol) and *N*-phenylacetamide (72 mg, 0.53 mmol) in  $\text{CHCl}_3$  (5 mL) was heated at 85 °C (external bath temperature) in a sealed tube. After 18 h the reaction mixture was concentrated and purified by flash chromatography (hexanes:EtOAc 5:1) to give the fluorenone **25c** (23 mg, 0.047 mmol, 82%) as a bright yellow oil. This sample contains ca. 5% of a second component to which we have tentatively assigned as the regioisomer having structure **S39** based on resonances in the <sup>1</sup>H NMR spectrum of the sample. The regioselectivity was substantiated by nOe analysis of the purified product mixture.

**<sup>1</sup>H NMR for 25c** (500 MHz, CDCl<sub>3</sub>): δ 7.56 (ddd, *J* = 7.3, 1.2, 1.2 Hz, 1H, *H*8), 7.47–7.41 (m, 2H, *H*5 and *H*6), 7.35 (s, 1H, *H*4), 7.31–7.21 (m, 3H, *PhH<sub>m</sub>* and *H*7), 7.05 (tt, *J* = 7.5, 1.3 Hz, 1H, *PhH<sub>p</sub>*), 6.75 (dd, *J* = 8.4, 1.3 Hz, 2H, *PhH<sub>o</sub>*), 4.17 (t, *J* = 6.4 Hz, 2H, OCH<sub>2</sub>C), 2.86 (br t, *J* = 8.2 Hz, 2H, ArCH<sub>2</sub>CH<sub>2</sub>), 2.13 (s, 3H, CH<sub>3</sub>CON), 2.08 (s, 3H, CH<sub>3</sub>CO<sub>2</sub>), 1.96–1.85 (m, Σ*J*<sub>s</sub> = 29.2 Hz, 2H, ArCH<sub>2</sub>CH<sub>2</sub>), and 0.46 (s, 9H, SiCH<sub>3</sub>).

**<sup>1</sup>H NMR for S39** (500 MHz, CDCl<sub>3</sub>): δ 7.13 (s, 1H, *H*3), 6.75 (br d, *J* = 8.1 Hz, 2H, *PhH<sub>o</sub>*), 4.13 (t, *J* = 6.4 Hz, 2H, OCH<sub>2</sub>C), 2.20 (s, 3H, CH<sub>3</sub>CON), 2.07 (s, 3H, CH<sub>3</sub>CO<sub>2</sub>), and 0.43 (s, 9H, SiCH<sub>3</sub>).

**<sup>13</sup>C NMR for 25c** (125 MHz, CDCl<sub>3</sub>): δ 194.4, 171.2, 161.1, 155.5, 148.1, 145.0, 144.1, 143.4, 140.4, 137.3, 134.5, 134.3, 129.2, 129.1, 123.9, 123.7, 120.8, 119.8, 116.6, 64.5, 31.1, 26.5, 21.2, 16.1, and 2.8.

**IR** (neat): 2950, 1738, 1711, 1685, 1591, 1487, 1467, 1368, 1295, 1224, 1164, 1120, 1039, and 858 cm<sup>-1</sup>.

**HRMS** (ESI-TOF): Calcd for C<sub>29</sub>H<sub>31</sub>NNaO<sub>4</sub>Si<sup>+</sup> [M+Na<sup>+</sup>] requires 508.1915; found 508.1882.

### 3-(3-Acetoxy-9-oxo-1-(trimethylsilyl)-9H-fluoren-2-yl)propyl Acetate (25d, Fig. 4A of manuscript)

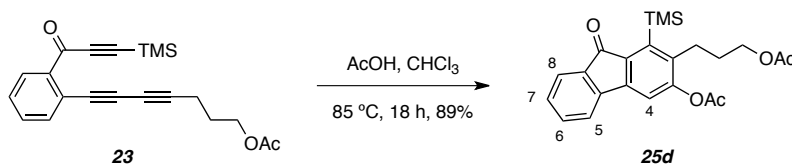

A solution of triyne **23** (22 mg, 0.062 mmol) and acetic acid (0.2 mL, 3.5 mmol) in CHCl<sub>3</sub> (5 mL) was heated at 85 °C (external bath temperature) in a sealed tube. After 18 h the reaction mixture was concentrated and purified by flash chromatography (hexanes:EtOAc 5:1) to give fluorenone **25d** (23 mg, 0.056 mmol 89%) as a bright yellow oil. The regioselectivity was substantiated by nOe analysis of the purified product mixture.

**<sup>1</sup>H NMR** (500 MHz, CDCl<sub>3</sub>): δ 7.58 (ddd, *J* = 7.2, 1.0, 1.0 Hz, 1H, *H*8), 7.46 (ddd, *J* = 7.4, 7.4, 1.2 Hz, 1H, *H*6), 7.41 (ddd, *J* = 7.4, 1.0, 1.0 Hz, 1H, *H*5), 7.28 (ddd, *J* = 7.4, 7.4, 1.1 Hz, 1H, *H*7), 7.22 (s, 1H, *H*4), 4.11 (t, *J* = 6.4 Hz, 2H), 2.78 (m, 2H, ArCH<sub>2</sub>), 2.39 (s, 3H, CH<sub>3</sub>CO<sub>2</sub>Ar), 2.08 (s, 3H, CH<sub>3</sub>CO<sub>2</sub>CH<sub>2</sub>), 1.82–1.75 (br tt, Σ*J*<sub>s</sub> = 29 Hz, 2H, ArCH<sub>2</sub>CH<sub>2</sub>), and 0.46 (s, 9H, SiCH<sub>3</sub>).

**<sup>13</sup>C NMR** (125 MHz, CDCl<sub>3</sub>): δ 194.3, 171.2, 169.4, 153.2, 145.2, 142.4, 143.1, 140.0, 137.8, 134.7, 134.1, 129.3, 124.1, 119.9, 115.9, 64.2, 31.0, 26.3, 21.18, 21.12, and 2.7.

**IR** (neat): 2949, 1759, 1739, 1713, 1605, 1591, 1467, 1387, 1366, 1295, 1243, 1201, 1159, 1118, 1039, 995, and 854 cm<sup>-1</sup>.

**HRMS** (ESI-TOF): Calcd for C<sub>23</sub>H<sub>26</sub>NaO<sub>5</sub>Si<sup>+</sup> [M+Na<sup>+</sup>] requires 433.1441; found 433.1436.

### 3-(3-(2-Hydroxyphenyl)-9-oxo-1-(trimethylsilyl)-9H-fluoren-2-yl)propyl Acetate (25e, Fig. 4A of manuscript)

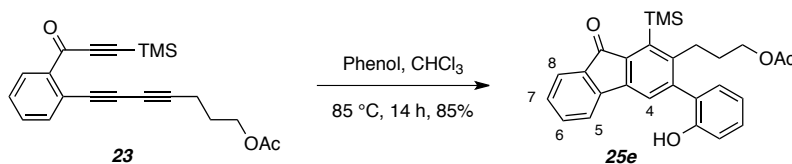

A solution of triyne **23** (21 mg, 0.06 mmol) and phenol (70 mg, 0.74 mmol) in CHCl<sub>3</sub> (5 mL) was heated at 85 °C (external bath temperature) in a sealed tube. After 14 h the reaction mixture was



concentrated and purified by flash chromatography (hexanes:EtOAc 5:1) to give fluorenone **25e** (23 mg, 0.052, 86%) as a bright yellow oil. The regioselectivity was substantiated by nOe analysis of the purified product mixture.

**<sup>1</sup>H NMR** (500 MHz, CDCl<sub>3</sub>): δ 7.61 (ddd, *J* = 7.4, 1.0, 1.0 Hz, 1H, *H8*), 7.46 (ddd, *J* = 7.4, 7.4, 1.0 Hz, 1H, *H6*), 7.41 (ddd, *J* = 7.5, 1.0, 1.0 Hz, 1H, *H5*), 7.40 (s, 1H, *H4*), 7.32 (ddd, *J* = 8.0, 7.3, 1.7 Hz, 1H, *H4'*), 7.28 (ddd, *J* = 7.3, 7.3, 1.2 Hz, 1H, *H7*), 7.15 (dd, 7.5, 1.7 Hz, 1H, *H6'*), 7.03 (ddd, *J* = 7.4, 7.4, 1.3 Hz, 1H, *H5'*), 7.01 (dd, *J* = 7.0, 1.3 Hz, 1H, *H3'*), 4.84 (s, 1H, *OH*), 3.83 (dt, *J* = 6.1, 11.0 Hz, 1H, AcOCH<sub>a</sub>Hb), 3.82 (dt, *J* = 6.0, 10.9 Hz, 1H, AcOCH<sub>b</sub>Hb), 2.87 (ddd, *J* = 13.7, 11.1, 5.4 Hz, 1H, ArCH<sub>a</sub>Hb), 2.65 (ddd, *J* = 13.7, 11.0, 5.5 Hz, 1H, ArCH<sub>b</sub>Hb), 1.87 (s, 3H, CH<sub>3</sub>CO<sub>2</sub>), 1.70-1.54 (m, 2H, ArCH<sub>2</sub>CH<sub>2</sub>), and 0.49 (s, 9H, SiCH<sub>3</sub>).

**<sup>13</sup>C NMR** (125 MHz, CDCl<sub>3</sub>): δ 195.1, 171.1, 152.2, 148.5, 143.60, 143.59, 143.4, 142.0, 140.7, 134.8, 134.0, 130.2, 129.7, 129.2, 128.4, 124.2, 123.9, 121.0, 119.8, 115.9, 63.8, 32.1, 29.4, 21.0, and 2.9.

**IR** (neat): 3440, 2951, 1736, 1710, 1606, 1590, 1541, 1464, 1448, 1386, 1363, 1247, 1185, 1040, and 979 cm<sup>-1</sup>.

**HRMS** (ESI-TOF): Calcd for C<sub>27</sub>H<sub>28</sub>NaO<sub>4</sub>Si<sup>+</sup> [*M*+Na<sup>+</sup>] requires 467.1649; found 467.1647.

**3-(3-Bromo-9-oxo-1-(trimethylsilyl)-9H-fluoren-2-yl)propyl acetate (25f, Fig. 4A of manuscript) and 3-(4-Bromo-9-oxo-1-(trimethylsilyl)-9H-fluoren-2-yl)propyl acetate (S40)**

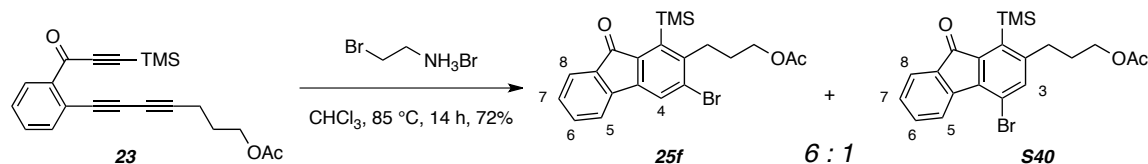

A solution of triyne **23** (18 mg, 0.051 mmol) and 2-bromoethylamine hydrobromide (the HBr source, 110 mg, 0.537 mmol) in THF:H<sub>2</sub>O (5 mL, 19:1) was heated at 85 °C (external bath temperature) in a sealed vial. After 18 h the reaction mixture was diluted with H<sub>2</sub>O and extracted with EtOAc. The combined organic extracts were concentrated and purified by flash chromatography (hexanes: EtOAc 12:1) to give a mixture (6:1) of coeluting, regioisomeric fluorenones **25f** and **S40** (16 mg, 0.037 mmol, 72%) as a bright yellow oil. These were spectroscopically characterized as a mixture.

**<sup>1</sup>H NMR of 25f** (500 MHz, CDCl<sub>3</sub>): δ 7.76 (s, 1H, *H4*), 7.60 (ddd, *J* = 7.4, 1.0, 1.0 Hz, 1H, *H8*), 7.48 (dd, *J* = 7.4, 7.4, 1.1 Hz, 1H, *H6*), 7.44 (d, *J* = 7.3, 1.0, 1.0 Hz, 1H, *H5*), 7.30 (ddd, *J* = 7.3, 7.3, 7.3, 1.1 Hz, *H7*), 4.17 (t, *J* = 6.5 Hz, 2H, AcOCH<sub>2</sub>), 3.09 (br t, *J* = 8.3 Hz, 2H, ArCH<sub>2</sub>), 2.08 (s, 3H, CH<sub>3</sub>CO<sub>2</sub>), 1.90-1.80 (m, 2H, ArCH<sub>2</sub>CH<sub>2</sub>), and 0.46 (s, 9H, SiCH<sub>3</sub>).

**<sup>13</sup>C NMR of 25f** (125 MHz, CDCl<sub>3</sub>): δ 194.4, 171.19, 147.0, 144.6, 144.2, 142.8, 139.5, 134.8, 134.0, 132.6, 129.5, 126.3, 124.3, 119.9, 64.1, 32.6, 30.6, 21.11, and 3.0

**<sup>1</sup>H NMR of S40** (500 MHz, CDCl<sub>3</sub>): δ 8.32 (ddd, *J* = 7.7, 0.9, 0.9 Hz, 1H, *H5*), 7.63 (d, *J* = 7.3, 1.2, 0.8 Hz, 1H, *H8*), 7.51 (ddd, *J* = 7.6, 7.6, 1.2 Hz, 1H, *H6*), 7.39 (s, 1H, *H3*), 7.32 (ddd, *J* = 7.5, 7.5, 0.8 Hz, 1H, *H7*), 4.12 (t, *J* = 6.4 Hz, 2H, AcOCH<sub>2</sub>), 2.83 (br t, *J* = 8.2 Hz, 2H, ArCH<sub>2</sub>), 2.08 (s, 3H, CH<sub>3</sub>CO<sub>2</sub>), 1.90-1.80 (m, 2H, ArCH<sub>2</sub>CH<sub>2</sub>), and 0.43 (s, 9H, SiCH<sub>3</sub>).

**<sup>13</sup>C NMR of S40** (125 MHz, CDCl<sub>3</sub>): δ 194.2, 171.15, 150.5, 143.4, 143.3, 141.4, 140.3, 134.7, 133.9, 129.2, 124.2, 123.2, 118.8, 63.7, 32.9, 32.1, 21.08, and 2.7 (one aromatic resonance is not detectable).

**IR** (neat): 2951, 1739, 1715, 1606, 1575, 1466, 1386, 1365, 1235, 1187, 1043, 974, 850, and 745 cm<sup>-1</sup>.

**HRMS** (ESI-TOF): Calcd for C<sub>21</sub>H<sub>23</sub>BrNaO<sub>3</sub>Si<sup>+</sup> [*M*+Na<sup>+</sup>] requires 453.0492; found 453.0512.

### Synthesis of phthalide **28** (Fig. 4B of manuscript)

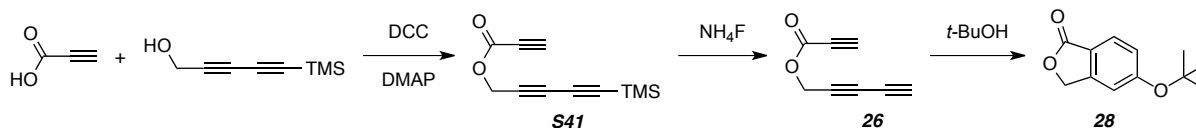

### 5-(Trimethylsilyl)penta-2,4-diyne-1-yl Propiolate (**S41**)

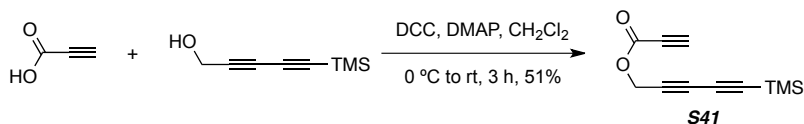

The following agents were added in sequence to  $\text{CH}_2\text{Cl}_2$  (1.5 mL) at 0 °C: 5-trimethylsilyl-2,4-pentadiyn-1-ol<sup>19</sup> (750 mg, 4.92 mmol), propiolic acid (420 mg, 6.00 mmol), DCC (1.2 g, 5.8 mmol), and DMAP (60 mg, 0.49 mmol). The resulting homogeneous solution quickly became cloudy. After 3 h the resulting slurry was passed through a pad of Celite<sup>®</sup> ( $\text{CH}_2\text{Cl}_2$ ) and concentrated. Purification by flash chromatography (hexanes:EtOAc 12:1) gave the ester **S41** (513 mg, 2.51 mmol, 51%) as a pale yellow oil.

<sup>1</sup>H NMR (500 MHz,  $\text{CDCl}_3$ ):  $\delta$  4.84 (s, 2H,  $\text{CH}_2\text{O}$ ), 2.95 (s, 1H,  $\text{HC}\equiv\text{C}$ ), and 0.20 (s, 9H,  $\text{CH}_3\text{Si}$ ).

<sup>13</sup>C NMR (125 MHz,  $\text{CDCl}_3$ ):  $\delta$  151.8, 89.2, 86.8, 76.2, 73.9, 72.6, 70.0, 54.0, and -0.4.

IR (neat): 3289, 2961, 2902, 2122, 1723, 1430, 1364, 1252, 1208, 966, 859, and 847  $\text{cm}^{-1}$ .

HRMS (CIMS): Calcd for  $\text{C}_{11}\text{H}_{16}\text{NO}_2\text{Si}^+$  [ $\text{M}+\text{NH}_4^+$ ] requires 222.0945; found 222.0968.

### Penta-2,4-diyne-1-yl Propiolate (**26**)

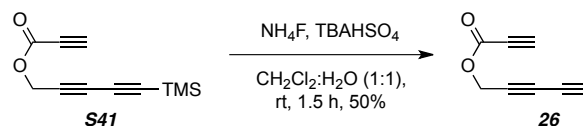

Tetra-*n*-butylammonium bisulfate (TBAHSO<sub>4</sub>, 10 mg, 0.03 mmol) was added to a vigorously stirring solution of silyl alkyne **S41** (220 mg, 1.08 mmol) and  $\text{NH}_4\text{F}$  (2.5 mL, 45 wt. % in water, 30 mmol) in  $\text{CH}_2\text{Cl}_2$  (5 mL) at room temperature. After 1.5 h the organic phase was separated from the biphasic reaction mixture and concentrated. Purification by flash chromatography (hexanes:EtOAc 12:1) gave the ester **26** (72 mg, 0.55 mmol, 50%) as a pale yellow oil.

<sup>1</sup>H NMR (500 MHz,  $\text{CDCl}_3$ ):  $\delta$  4.84 (d,  $J = 1.0$  Hz, 2H,  $\text{CH}_2\text{O}$ ), 2.97 (s, 1H,  $\text{HC}\equiv\text{CC}=\text{O}$ ), and 2.24 (t,  $J = 1.0$  Hz, 1H,  $\text{HC}\equiv\text{CC}\equiv\text{C}$ ).

<sup>13</sup>C NMR (125 MHz,  $\text{CDCl}_3$ ):  $\delta$  151.7, 76.4, 73.8, 71.9, 69.5, 68.8, 67.1, and 53.7.

IR (neat): 3289, 2123, 1720, 1432, 1367, 1209, and 966  $\text{cm}^{-1}$ .

HRMS (CIMS): Calcd for  $\text{C}_8\text{H}_8\text{NO}_2^+$  [ $\text{M}+\text{NH}_4^+$ ] requires 150.0550; found 150.0564.

### 5-(*tert*-Butoxy)isobenzofuran-1(3*H*)-one (**28**, Fig. 4B)

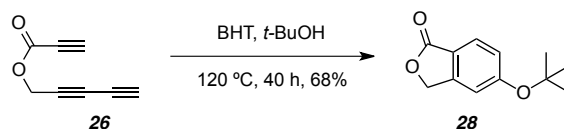

A solution of ester **26** (15 mg, 0.11 mmol) and 2,6-di-*tert*-butyl-4-methylphenol (butylated hydroxytoluene, BHT, 2 mg, 0.009 mmol) in *t*-BuOH (9 mL) was heated to 120 °C (external bath temperature) in a sealed tube. After 40 h the resulting solution was concentrated and purified by gradient flash chromatography (hexanes:EtOAc 12:1 to 5:1) to give the ester **28** (16 mg, 0.078 mmol, 68%) as a clear colorless oil.

**<sup>1</sup>H NMR** (500 MHz, CDCl<sub>3</sub>): δ 7.81 (dd, *J* = 0.4, 8.4 Hz, 1H, *H7*), 7.11 (ddt, *J* = 8.4, 2.0, 0.9 Hz, 1H, *H6*), 7.04 (ddt, *J* = 2.0, 0.9, 0.9 Hz, 2H, *H4*), 5.26 (dd, *J* = 0.8, 0.8 Hz, 2H, CH<sub>2</sub>O), and 1.45 [s, 9H, C(CH<sub>3</sub>)<sub>3</sub>].

**<sup>13</sup>C NMR** (125 MHz, CDCl<sub>3</sub>): δ 170.9, 161.7, 148.6, 126.8, 124.1, 120.0, 115.2, 80.4, 69.2, and 29.0.

**IR** (neat): 2977, 2937, 2877, 1759, 1612, 1484, 1454, 1369, 1354, 1264, 1168, 1141, 1099, 1045, 1006, and 948 cm<sup>-1</sup>.

**HRMS** (ESI-TOF): Calcd for C<sub>12</sub>H<sub>14</sub>NaO<sub>3</sub> [M+Na<sup>+</sup>] requires 229.0835; found 229.0859.

#### IV. Computational details for fluorenynyne 24 (R = CH<sub>3</sub>)

Calculations were carried out in Gaussian 09<sup>20</sup> using M06-2X/6-31+G(d,p)<sup>21</sup> for geometry optimizations and frequency calculations. The optimized geometry was found to have no imaginary frequencies.

#### Optimized geometry of fluorenynyne 24 (R = CH<sub>3</sub>)

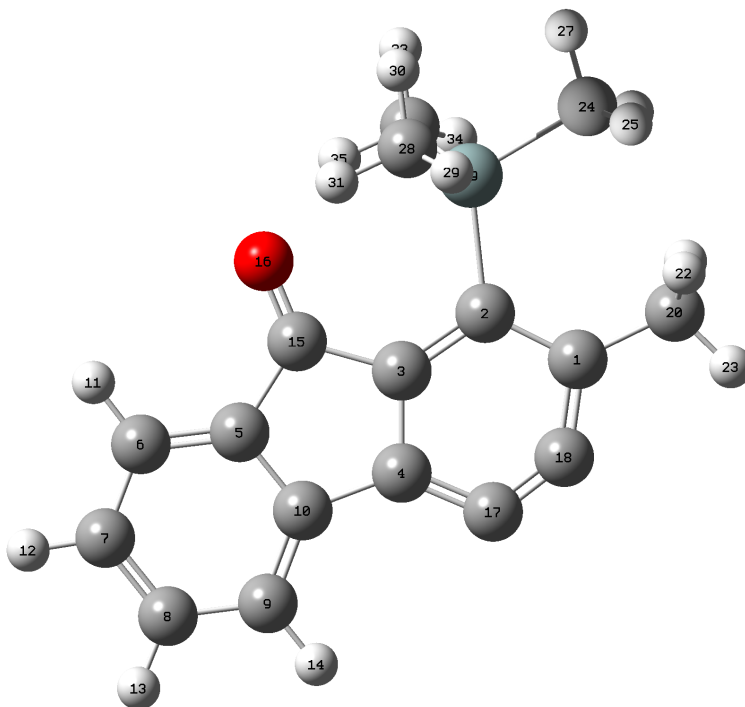

Total Electronic Energy: SCF Done: E(RM062X) = -1021.76985895 A.U.<sup>a</sup>

<sup>a</sup> Atomic Units = Hartrees

Coordinates for optimized geometry of **24** (R = CH<sub>3</sub>)

| Atom # | Atom Type | Cartesian Coordinates (x,y,z) |           |           |
|--------|-----------|-------------------------------|-----------|-----------|
| 1      | C         | 1.690386                      | 1.977336  | -0.000258 |
| 2      | C         | 1.2624                        | 0.602774  | -0.000158 |
| 3      | C         | -0.12186                      | 0.326038  | -0.000031 |
| 4      | C         | -1.14924                      | 1.315436  | 0.000142  |
| 5      | C         | -2.305505                     | -0.700459 | -0.000143 |
| 6      | C         | -3.378661                     | -1.573123 | -0.000251 |
| 7      | C         | -4.666616                     | -1.023565 | -0.000102 |
| 8      | C         | -4.847252                     | 0.360586  | 0.000151  |
| 9      | C         | -3.754875                     | 1.237481  | 0.00026   |
| 10     | C         | -2.483313                     | 0.687547  | 0.000105  |
| 11     | H         | -3.215238                     | -2.646641 | -0.000449 |
| 12     | H         | -5.53335                      | -1.67636  | -0.000181 |
| 13     | H         | -5.854817                     | 0.765051  | 0.000267  |
| 14     | H         | -3.899142                     | 2.313585  | 0.000461  |
| 15     | C         | -0.83808                      | -1.0052   | -0.000257 |
| 16     | O         | -0.351486                     | -2.115683 | -0.000537 |
| 17     | C         | -0.659874                     | 2.605768  | 0.00018   |
| 18     | C         | 0.577294                      | 2.788264  | 0.000042  |
| 19     | Si        | 2.505546                      | -0.877904 | 0.00014   |
| 20     | C         | 3.104711                      | 2.489669  | -0.000678 |
| 21     | H         | 3.653017                      | 2.156017  | 0.88277   |
| 22     | H         | 3.652975                      | 2.15463   | -0.883621 |
| 23     | H         | 3.094569                      | 3.580144  | -0.001529 |
| 24     | C         | 4.329368                      | -0.374376 | 0.000597  |
| 25     | H         | 4.639615                      | 0.179389  | -0.888841 |
| 26     | H         | 4.638956                      | 0.180411  | 0.889618  |
| 27     | H         | 4.886913                      | -1.319362 | 0.001349  |
| 28     | C         | 2.29172                       | -1.863141 | -1.586687 |
| 29     | H         | 2.547082                      | -1.238863 | -2.449627 |
| 30     | H         | 2.985008                      | -2.711905 | -1.575418 |
| 31     | H         | 1.281059                      | -2.250974 | -1.714636 |
| 32     | C         | 2.290749                      | -1.862575 | 1.587209  |
| 33     | H         | 2.982544                      | -2.712552 | 1.575919  |
| 34     | H         | 2.547457                      | -1.238535 | 2.449917  |
| 35     | H         | 1.279482                      | -2.248681 | 1.715612  |

## V. Computational details for aryne 27-comp generation and trapping

To identify starting geometries for the DFT calculations, Monte Carlo conformational searches were carried out in MacroModel version 9.9<sup>22</sup>. DFT calculations were carried out in Gaussian 09<sup>20</sup> using M06-2X/6-31+G(d,p)<sup>21</sup> for geometry optimizations and frequency calculations. The optimized geometries were found to have no imaginary frequencies. The energy values corresponding to the “Sum of electronic and thermal Free Energies=” were used for the Boltzmann analysis of each family of conformers and as the  $\Delta G_{\text{M06-2X}}$  values.

A total of six stable conformers (including two enantiomeric pairs) of the substrate triyne **26** were found (cf. **26-comp-a-d**). Only a single geometry was identified for aryne **27**. Four stable conformers (including one enantiomeric pair) of the product phthalide **28** were found (cf. **28-comp-a-c**). Full Boltzmann analysis was conducted with each of the six conformers of **26** and the aryne **27** to determine the equilibrium ratio of the two states (i.e., starting material and product). The Boltzmann analysis was carried out at 298 K by the following equation,

$$\begin{array}{l} \text{percentage} \\ \text{(mole fraction)} \\ \text{of the } i\text{th component} \\ \text{of } n \text{ species} \\ \text{in equilibrium} \end{array} = \frac{e^{(-\Delta E_i^* / RT)}}{\sum_{i=1}^n e^{(-\Delta E_i^* / RT)}}$$

where  $\Delta E_i$  is the difference in free energy between the  $i^{\text{th}}$  component and the lowest energy component. Boltzmann analysis was also conducted on the aryne **27** (plus *tert*-butanol) and each of the four conformers of **28**.

### Boltzmann Analysis to Determine $\Delta G_{\text{M06-2X}}$ for 26 to 27

| Structure of each component <i>i</i> | Free Energy (rel to 27-comp) (kcal•mol <sup>-1</sup> ) | mol fraction of each of the <i>i</i> components |
|--------------------------------------|--------------------------------------------------------|-------------------------------------------------|
| <b>27-comp</b>                       | 0.0                                                    | 1.0                                             |
| <b>26-comp-a</b>                     | 56.8                                                   | 2.2x10 <sup>-42</sup>                           |
| <b>26-comp-b</b>                     | 55.8                                                   | 1.1x10 <sup>-41</sup>                           |
| <b>ent-26-comp-b</b>                 | 55.8                                                   | 1.1x10 <sup>-41</sup>                           |
| <b>26-comp-c</b>                     | 51.2                                                   | 3.0x10 <sup>-38</sup>                           |
| <b>26-comp-d</b>                     | 51.4                                                   | 1.9x10 <sup>-38</sup>                           |
| <b>ent-26-comp-d</b>                 | 51.4                                                   | 1.9x10 <sup>-38</sup>                           |

Equilibrium ratio of **27/26**:

$$[\%27\text{-comp}/\Sigma(\%26\text{-comp-a-d})] = 1.5 \times 10^{37},$$

which corresponds to a  $\Delta G_{\text{M06-2X}} = -50.6 \text{ kcal}\cdot\text{mol}^{-1}$ .

**Boltzmann Analysis to Determine  $\Delta G_{M06-2X}$  for 27 to 28**

| <b>Structure<br/>of each<br/>component <i>i</i></b> | <b>Free Energy<br/>(rel to 28-comp-c)<br/>(kcal•mol<sup>-1</sup>)</b> | <b>mol fraction<br/>of each of the<br/><i>i</i> components</b> |
|-----------------------------------------------------|-----------------------------------------------------------------------|----------------------------------------------------------------|
| <b>27-comp + <i>tert</i>-butanol</b>                | 72.0                                                                  | 5.6 x10 <sup>-54</sup>                                         |
| <b>28-comp-a</b>                                    | 0.760                                                                 | 0.11                                                           |
| <b>28-comp-b</b>                                    | 0.834                                                                 | 0.097                                                          |
| <b>28-comp-c</b>                                    | 0.0                                                                   | 0.40                                                           |
| <b><i>ent</i>-28-comp-c</b>                         | 0.0                                                                   | 0.40                                                           |

Equilibrium ratio of **28/27**:

$$[\Sigma(\%28\text{-comp-a-c})/\%(27\text{-comp} + \textit{tert}\text{-butanol})] = 1.8 \times 10^{53},$$

which corresponds to a  $\Delta G_{M06-2X} = -72.6 \text{ kcal}\cdot\text{mol}^{-1}$ .

Computed energies and geometry of conformer **26-comp-a**.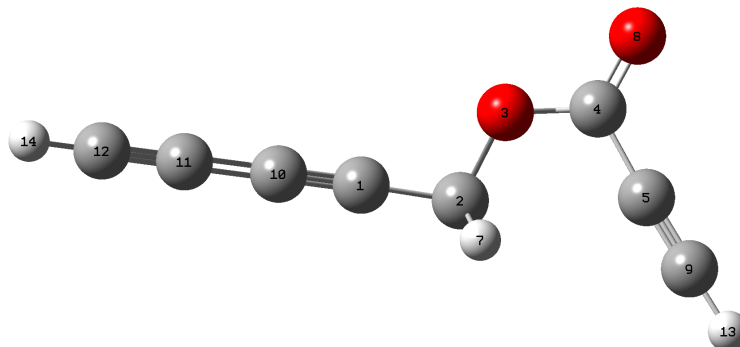

SCF Done: E(RM062X)<sup>a</sup> = -457.32014637 A.U. (Atomic Units = Hartrees)  
Sum of electronic and thermal Free Energies = -457.263860 A.U.<sup>b</sup>

| Atom # | Atom Type | Cartesian Coordinates (x,y,z) |           |           |
|--------|-----------|-------------------------------|-----------|-----------|
| 1      | C         | -1.330378                     | -0.374165 | 0.000053  |
| 2      | C         | 0.110681                      | -0.599505 | 0.000086  |
| 3      | O         | 0.764303                      | 0.676623  | 0.000069  |
| 4      | C         | 2.110197                      | 0.728397  | 0.000006  |
| 5      | C         | 2.815417                      | -0.554070 | -0.000038 |
| 6      | H         | 0.401232                      | -1.169518 | -0.888790 |
| 7      | H         | 0.401214                      | -1.169478 | 0.888994  |
| 8      | O         | 2.685186                      | 1.780395  | -0.000044 |
| 9      | C         | 3.440973                      | -1.584801 | -0.000068 |
| 10     | C         | -2.529314                     | -0.215092 | 0.000013  |
| 11     | C         | -3.897267                     | -0.036261 | -0.000011 |
| 12     | C         | -5.095672                     | 0.120837  | -0.000070 |
| 13     | H         | 4.007666                      | -2.490939 | -0.000075 |
| 14     | H         | -6.153839                     | 0.261757  | -0.000143 |

<sup>a</sup> Total electronic energy.

<sup>b</sup> Used for the  $\Delta G_{M06-2X}$  calculation.



Computed energies and geometry of conformer **26-comp-b**.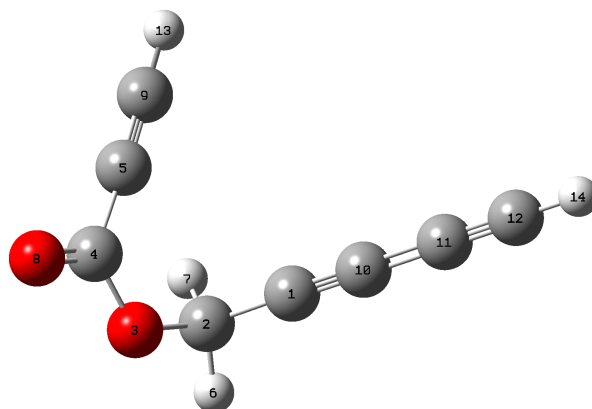

SCF Done: E(RM062X)<sup>a</sup> = -457.32215905 A.U. (Atomic Units = Hartrees)  
 Sum of electronic and thermal Free Energies = -457.265396 A.U.<sup>b,c</sup>

| Atom # | Atom Type | Cartesian Coordinates (x,y,z) |           |           |
|--------|-----------|-------------------------------|-----------|-----------|
| 1      | C         | 0.876586                      | -0.715053 | -0.545004 |
| 2      | C         | -0.425875                     | -1.187842 | -1.018120 |
| 3      | O         | -1.404360                     | -1.226789 | 0.024046  |
| 4      | C         | -1.965133                     | -0.082842 | 0.471172  |
| 5      | C         | -1.588454                     | 1.150189  | -0.217937 |
| 6      | H         | -0.348207                     | -2.221057 | -1.360837 |
| 7      | H         | -0.774811                     | -0.566964 | -1.849505 |
| 8      | O         | -2.745879                     | -0.103576 | 1.380360  |
| 9      | C         | -1.312505                     | 2.196055  | -0.750090 |
| 10     | C         | 1.962854                      | -0.340698 | -0.164597 |
| 11     | C         | 3.198022                      | 0.092227  | 0.271051  |
| 12     | C         | 4.280463                      | 0.471266  | 0.652834  |
| 13     | H         | -1.066966                     | 3.127098  | -1.213503 |
| 14     | H         | 5.236146                      | 0.804038  | 0.992748  |

<sup>a</sup> Total electronic energy.

<sup>b</sup> Used for the  $\Delta G_{M06-2X}$  calculation.

<sup>c</sup> This conformer is chiral and so its energy has been used twice in the Boltzmann analysis to account for its enantiomeric partner.

Computed energies and geometry of conformer **26-comp-c**.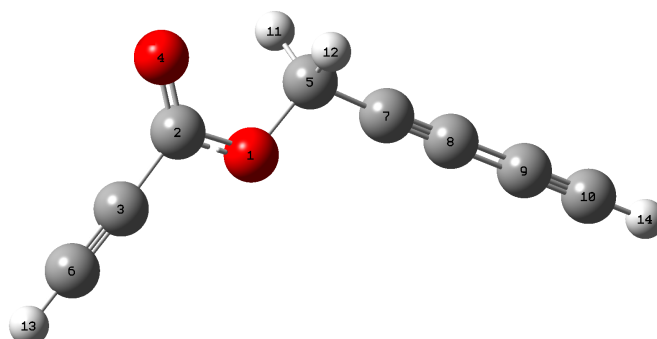

SCF Done:  $E(\text{RM062X})^a = -457.32971192$  A.U. (Atomic Units = Hartrees)  
Sum of electronic and thermal Free Energies =  $-457.272831$  A.U.<sup>b</sup>

| Atom # | Atom Type | Cartesian Coordinates (x,y,z) |           |           |
|--------|-----------|-------------------------------|-----------|-----------|
| 1      | O         | -0.826589                     | 0.052971  | 0.000301  |
| 2      | C         | -2.115081                     | -0.320336 | -0.000053 |
| 3      | C         | -2.996797                     | 0.836372  | -0.000026 |
| 4      | O         | -2.490236                     | -1.465777 | -0.00036  |
| 5      | C         | 0.099709                      | -1.044971 | 0.000240  |
| 6      | C         | -3.761608                     | 1.766584  | -0.000019 |
| 7      | C         | 1.453599                      | -0.503563 | 0.000117  |
| 8      | C         | 2.590968                      | -0.091598 | 0.000028  |
| 9      | C         | 3.887812                      | 0.379312  | -0.000080 |
| 10     | C         | 5.023940                      | 0.792052  | -0.000174 |
| 11     | H         | -0.074330                     | -1.665062 | 0.885082  |
| 12     | H         | -0.074491                     | -1.665115 | -0.884529 |
| 13     | H         | -4.438960                     | 2.592683  | -0.000030 |
| 14     | H         | 6.027130                      | 1.156823  | -0.000246 |

<sup>a</sup> Total electronic energy.

<sup>b</sup> Used for the  $\Delta G_{\text{M06-2X}}$  calculation.

Computed energies and geometry of conformer **26-comp-d**.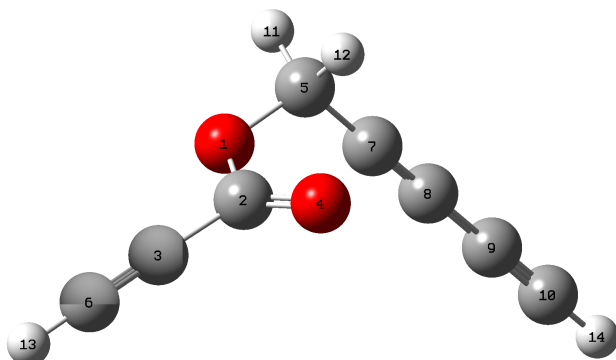

SCF Done: E(RM062X)<sup>a</sup> = -457.32970621 A.U. (Atomic Units = Hartrees)  
 Sum of electronic and thermal Free Energies = -457.272414 A.U.<sup>b,c</sup>

| Atom # | Atom Type | Cartesian Coordinates (x,y,z) |           |           |
|--------|-----------|-------------------------------|-----------|-----------|
| 1      | O         | -1.144225                     | 0.823289  | -0.614533 |
| 2      | C         | -1.666743                     | 0.042466  | 0.348947  |
| 3      | C         | -2.785924                     | -0.733671 | -0.162130 |
| 4      | O         | -1.267807                     | -0.000602 | 1.483270  |
| 5      | C         | -0.015751                     | 1.611665  | -0.210366 |
| 6      | C         | -3.718358                     | -1.393078 | -0.544482 |
| 7      | C         | 1.212162                      | 0.818059  | -0.155572 |
| 8      | C         | 2.238817                      | 0.178423  | -0.123093 |
| 9      | C         | 3.409028                      | -0.551075 | -0.082029 |
| 10     | C         | 4.434776                      | -1.189656 | -0.046039 |
| 11     | H         | 0.067276                      | 2.389830  | -0.970350 |
| 12     | H         | -0.214302                     | 2.064278  | 0.764941  |
| 13     | H         | -4.544399                     | -1.979557 | -0.883419 |
| 14     | H         | 5.339647                      | -1.754841 | -0.012489 |

<sup>a</sup> Total electronic energy.

<sup>b</sup> Used for the  $\Delta G_{M06-2X}$  calculation.

<sup>c</sup> This conformer is chiral and so its energy has been used twice in the Boltzmann analysis to account for its enantiomeric partner.

Computed energies and geometry of phthalidyne **27-comp**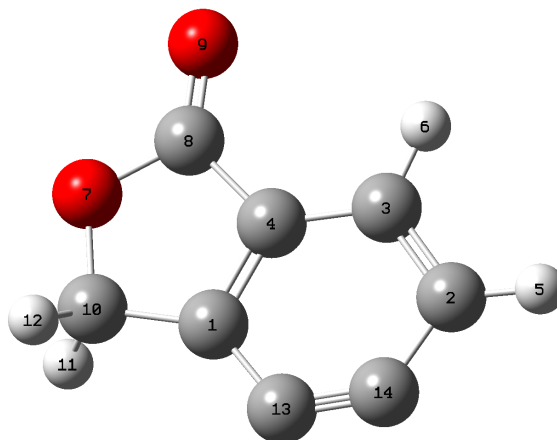

SCF Done:  $E(\text{RM062X})^a = -457.421000427$  A.U. (Atomic Units = Hartrees)  
Sum of electronic and thermal Free Energies =  $-457.354360$  A.U.<sup>b</sup>

| Atom # | Atom Type | Cartesian Coordinates (x,y,z) |           |           |
|--------|-----------|-------------------------------|-----------|-----------|
| 1      | C         | -0.203499                     | 1.006256  | -0.000567 |
| 2      | C         | -2.429086                     | -0.846300 | 0.000362  |
| 3      | C         | -1.096583                     | -1.299162 | 0.000158  |
| 4      | C         | -0.036961                     | -0.382278 | -0.000389 |
| 5      | H         | -3.275962                     | -1.519894 | 0.001131  |
| 6      | H         | -0.882676                     | -2.363861 | -0.000202 |
| 7      | O         | 2.065715                      | 0.558787  | 0.000610  |
| 8      | C         | 1.424726                      | -0.648470 | -0.000102 |
| 9      | O         | 2.011276                      | -1.693712 | -0.000320 |
| 10     | C         | 1.147816                      | 1.656842  | 0.000295  |
| 11     | H         | 1.326688                      | 2.263633  | -0.891703 |
| 12     | H         | 1.325278                      | 2.263227  | 0.892881  |
| 13     | C         | -1.535693                     | 1.380622  | -0.000842 |
| 14     | C         | -2.455595                     | 0.538540  | 0.000347  |

<sup>a</sup> Total electronic energy.

<sup>b</sup> Used for the  $\Delta G_{\text{M06-2X}}$  calculation.

Computed energies and geometry of phthalide **28-comp-a**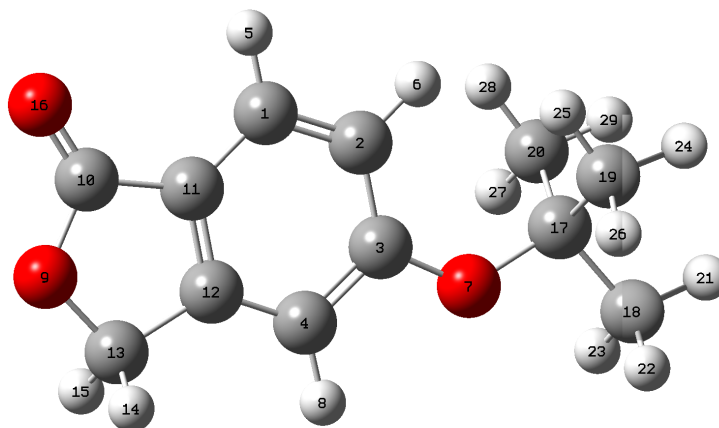

SCF Done:  $E(\text{RM062X})^a = -691.13488438$  A.U. (Atomic Units = Hartrees)  
 Sum of electronic and thermal Free Energies =  $-690.935672$  A.U.<sup>b</sup>

| Atom # | Atom Type | Cartesian Coordinates (x,y,z) |           |           |
|--------|-----------|-------------------------------|-----------|-----------|
| 1      | C         | 1.024545                      | -1.448621 | -0.000301 |
| 2      | C         | -0.318542                     | -1.083017 | -0.000799 |
| 3      | C         | -0.686907                     | 0.277141  | -0.001109 |
| 4      | C         | 0.301189                      | 1.278111  | -0.000985 |
| 5      | H         | 1.316982                      | -2.494005 | -0.000053 |
| 6      | H         | -1.067972                     | -1.859557 | -0.000992 |
| 7      | O         | -1.948166                     | 0.765055  | -0.001854 |
| 8      | H         | -0.014742                     | 2.316201  | -0.001254 |
| 9      | O         | 3.951681                      | 0.733714  | 0.000186  |
| 10     | C         | 3.459485                      | -0.544078 | 0.000302  |
| 11     | C         | 1.985864                      | -0.448717 | -0.000178 |
| 12     | C         | 1.627625                      | 0.892356  | -0.000547 |
| 13     | C         | 2.897752                      | 1.701803  | -0.000320 |
| 14     | H         | 3.000937                      | 2.327188  | 0.891223  |
| 15     | H         | 3.001467                      | 2.326835  | -0.892050 |
| 16     | O         | 4.171571                      | -1.510638 | 0.000680  |
| 17     | C         | -3.163856                     | -0.019075 | 0.000419  |
| 18     | C         | -4.243096                     | 1.062526  | 0.000860  |
| 19     | C         | -3.283441                     | -0.849464 | 1.279382  |
| 20     | C         | -3.286711                     | -0.851600 | -1.276856 |
| 21     | H         | -5.236351                     | 0.605929  | 0.002209  |
| 22     | H         | -4.142691                     | 1.693652  | 0.887701  |

|    |   |           |           |           |
|----|---|-----------|-----------|-----------|
| 23 | H | -4.144567 | 1.692457  | -0.887040 |
| 24 | H | -4.291310 | -1.270457 | 1.339527  |
| 25 | H | -2.574798 | -1.676730 | 1.330752  |
| 26 | H | -3.126345 | -0.207738 | 2.150842  |
| 27 | H | -3.132229 | -0.211245 | -2.149785 |
| 28 | H | -2.577922 | -1.678702 | -1.328845 |
| 29 | H | -4.294589 | -1.273057 | -1.333544 |

<sup>a</sup> Total electronic energy.

<sup>b</sup> Used for the  $\Delta G_{M06-2X}$  calculation.

Computed energies and geometry of phthalide **28-comp-b**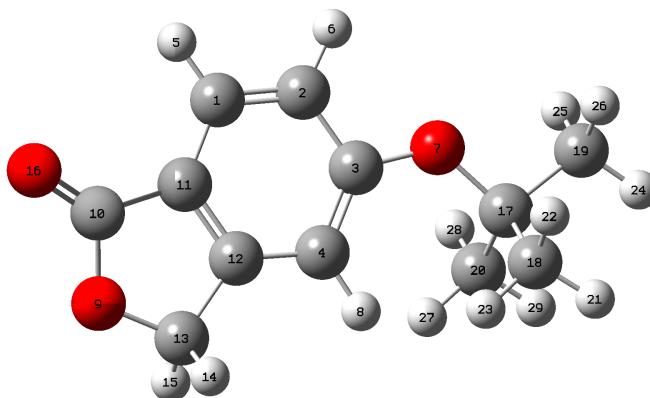

SCF Done:  $E(\text{RM062X})^a = -691.13501812$  A.U. (Atomic Units = Hartrees)  
 Sum of electronic and thermal Free Energies =  $-690.935554$  A.U.<sup>b</sup>

| Atom # | Atom Type | Cartesian Coordinates (x,y,z) |           |           |
|--------|-----------|-------------------------------|-----------|-----------|
| 1      | C         | -1.453737                     | 1.760783  | 0.000050  |
| 2      | C         | -0.072685                     | 1.803325  | 0.000042  |
| 3      | C         | 0.701120                      | 0.618552  | 0.000076  |
| 4      | C         | 0.073884                      | -0.634602 | 0.000078  |
| 5      | H         | -2.049658                     | 2.667791  | 0.000084  |
| 6      | H         | 0.464679                      | 2.745188  | 0.000034  |
| 7      | O         | 2.032180                      | 0.853496  | 0.000043  |
| 8      | H         | 0.632888                      | -1.559126 | 0.000019  |
| 9      | O         | -3.575047                     | -1.222151 | -0.000204 |
| 10     | C         | -3.497772                     | 0.146055  | 0.000381  |
| 11     | C         | -2.066169                     | 0.507151  | 0.000138  |
| 12     | C         | -1.317321                     | -0.653326 | 0.000084  |
| 13     | C         | -2.274957                     | -1.815967 | -0.000134 |
| 14     | H         | -2.179493                     | -2.443107 | 0.891504  |
| 15     | H         | -2.179291                     | -2.442867 | -0.891920 |
| 16     | O         | -4.472110                     | 0.847034  | -0.000389 |
| 17     | C         | 3.069382                      | -0.153854 | 0.000026  |
| 18     | C         | 3.023230                      | -0.993372 | 1.277860  |
| 19     | C         | 4.341102                      | 0.692878  | -0.000177 |
| 20     | C         | 3.022974                      | -0.993597 | -1.277651 |
| 21     | H         | 3.928220                      | -1.604909 | 1.337490  |

|    |   |          |           |           |
|----|---|----------|-----------|-----------|
| 22 | H | 2.994868 | -0.334720 | 2.150323  |
| 23 | H | 2.165353 | -1.664938 | 1.327384  |
| 24 | H | 5.224664 | 0.049178  | -0.000165 |
| 25 | H | 4.367832 | 1.330759  | -0.887426 |
| 26 | H | 4.367967 | 1.330977  | 0.886912  |
| 27 | H | 2.165173 | -1.665287 | -1.326821 |
| 28 | H | 2.994285 | -0.335097 | -2.150218 |
| 29 | H | 3.928027 | -1.605026 | -1.337430 |

<sup>a</sup> Total electronic energy.

<sup>b</sup> Used for the  $\Delta G_{M06-2X}$  calculation.



Computed energies and geometry of phthalide **28-comp-c**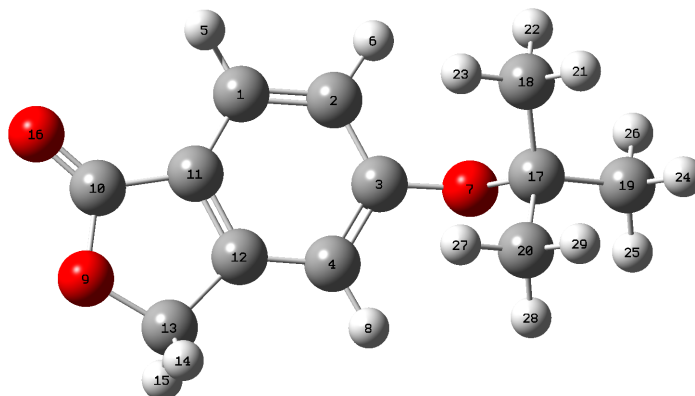

SCF Done:  $E(\text{RM062X})^a = -691.13668992$  A.U. (Atomic Units = Hartrees)  
 Sum of electronic and thermal Free Energies =  $-690.936883$  A.U.<sup>b,c</sup>

| Atom # | Atom Type | Cartesian Coordinates (x,y,z) |           |           |
|--------|-----------|-------------------------------|-----------|-----------|
| 1      | C         | 1.168789                      | -1.627371 | -0.190269 |
| 2      | C         | -0.185308                     | -1.457945 | -0.450028 |
| 3      | C         | -0.734000                     | -0.169632 | -0.579236 |
| 4      | C         | 0.067955                      | 0.971351  | -0.476475 |
| 5      | H         | 1.613210                      | -2.612392 | -0.089554 |
| 6      | H         | -0.844515                     | -2.310433 | -0.572786 |
| 7      | O         | -2.056531                     | -0.035361 | -0.899535 |
| 8      | H         | -0.377423                     | 1.951605  | -0.613776 |
| 9      | O         | 3.703071                      | 0.977825  | 0.197715  |
| 10     | C         | 3.403066                      | -0.356537 | 0.191203  |
| 11     | C         | 1.951650                      | -0.483259 | -0.071915 |
| 12     | C         | 1.419619                      | 0.787787  | -0.216463 |
| 13     | C         | 2.542892                      | 1.777074  | -0.051096 |
| 14     | H         | 2.396262                      | 2.448551  | 0.800035  |
| 15     | H         | 2.718122                      | 2.372326  | -0.952120 |
| 16     | O         | 4.227743                      | -1.207841 | 0.377637  |
| 17     | C         | -3.035267                     | 0.075111  | 0.172185  |
| 18     | C         | -3.015284                     | -1.176323 | 1.046087  |
| 19     | C         | -4.356872                     | 0.193476  | -0.574552 |
| 20     | C         | -2.769706                     | 1.325353  | 1.007137  |
| 21     | H         | -3.813132                     | -1.115101 | 1.792005  |
| 22     | H         | -3.180672                     | -2.070300 | 0.437431  |

|    |   |           |           |           |
|----|---|-----------|-----------|-----------|
| 23 | H | -2.064617 | -1.280872 | 1.577144  |
| 24 | H | -5.185461 | 0.284940  | 0.133194  |
| 25 | H | -4.346006 | 1.074215  | -1.222096 |
| 26 | H | -4.518397 | -0.691439 | -1.195701 |
| 27 | H | -1.817109 | 1.256599  | 1.540673  |
| 28 | H | -2.756270 | 2.214487  | 0.369455  |
| 29 | H | -3.563463 | 1.446329  | 1.750097  |

<sup>a</sup> Total electronic energy.

<sup>b</sup> Used for the  $\Delta G_{M06-2X}$  calculation.

<sup>c</sup> This conformer is chiral and so its energy has been used twice in the Boltzmann analysis to account for its enantiomeric partner.

Computed energies and geometry of *tert*-butanol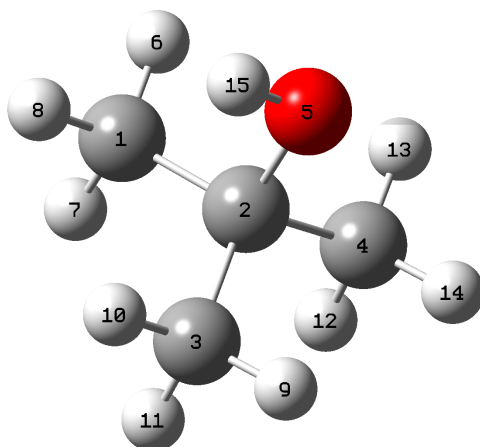

SCF Done:  $E(\text{RM062X})^a = -233.57558379$  A.U. (Atomic Units = Hartrees)  
 Sum of electronic and thermal Free Energies =  $-233.467756$  A.U.<sup>b</sup>

| Atom # | Atom Type | Cartesian Coordinates (x,y,z) |           |           |
|--------|-----------|-------------------------------|-----------|-----------|
| 1      | C         | -0.682587                     | 1.258466  | -0.514106 |
| 2      | C         | 0.005339                      | 0.000000  | 0.015784  |
| 3      | C         | -0.682587                     | -1.258466 | -0.514106 |
| 4      | C         | 1.485602                      | 0.000000  | -0.344669 |
| 5      | O         | -0.027574                     | 0.000000  | 1.445529  |
| 6      | H         | -0.202302                     | 2.149750  | -0.100742 |
| 7      | H         | -0.630700                     | 1.304455  | -1.606526 |
| 8      | H         | -1.740783                     | 1.270730  | -0.227281 |
| 9      | H         | -0.202301                     | -2.149750 | -0.100743 |
| 10     | H         | -1.740782                     | -1.270731 | -0.227281 |
| 11     | H         | -0.630700                     | -1.304455 | -1.606526 |
| 12     | H         | 1.618390                      | 0.000000  | -1.430583 |
| 13     | H         | 1.971526                      | 0.886897  | 0.071317  |
| 14     | H         | 1.971527                      | -0.886896 | 0.071318  |
| 15     | H         | -0.947879                     | 0.000000  | 1.735396  |

<sup>a</sup> Total electronic energy.

<sup>b</sup> Used for the  $\Delta G_{\text{M06-2X}}$  calculation.

**VI. Copies of  $^1\text{H}$  and  $^{13}\text{C}$  NMR spectra for each isolated compound**

500 MHz, CDCl<sub>3</sub>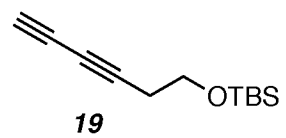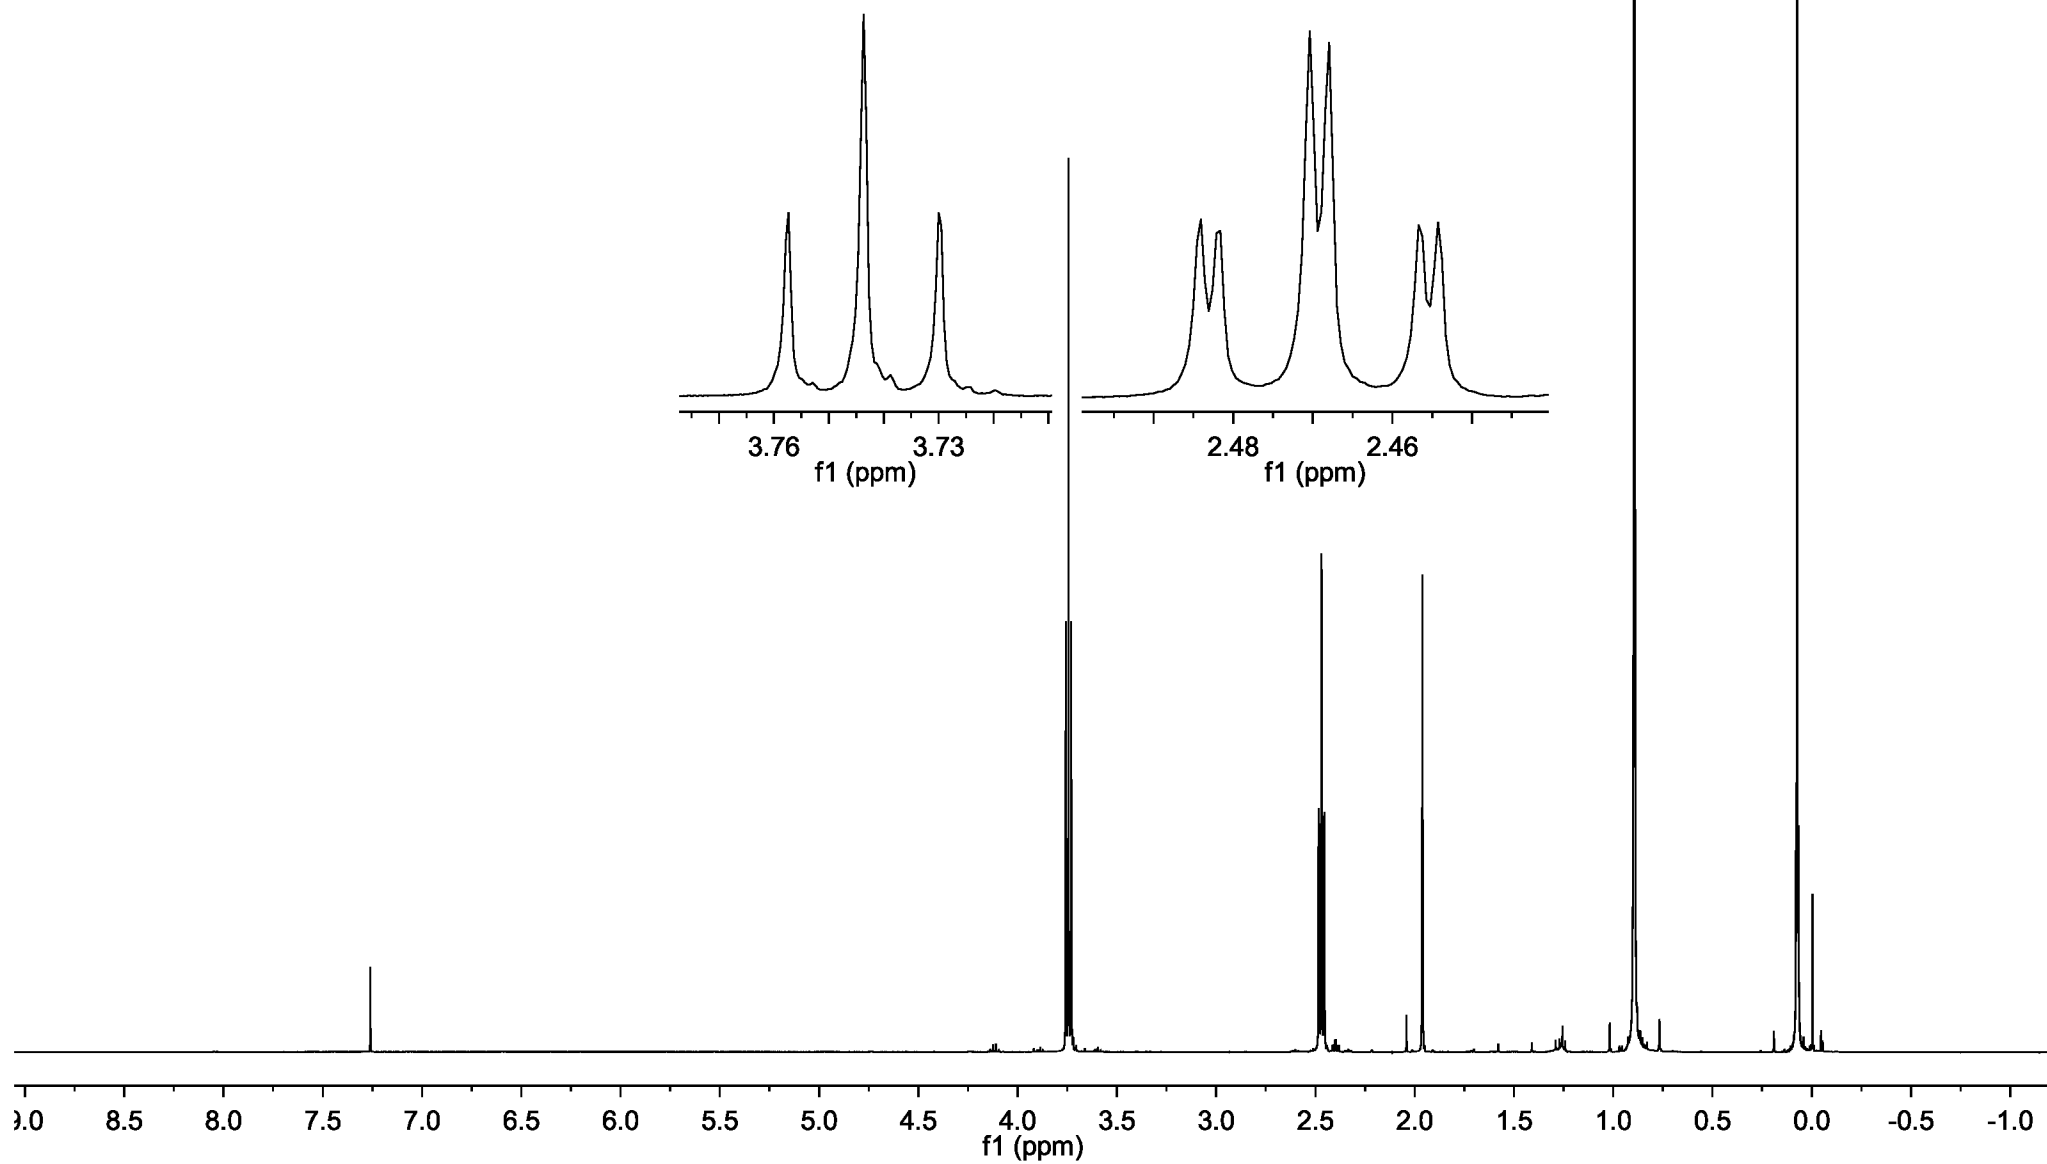

125 MHz, CDCl<sub>3</sub>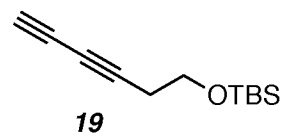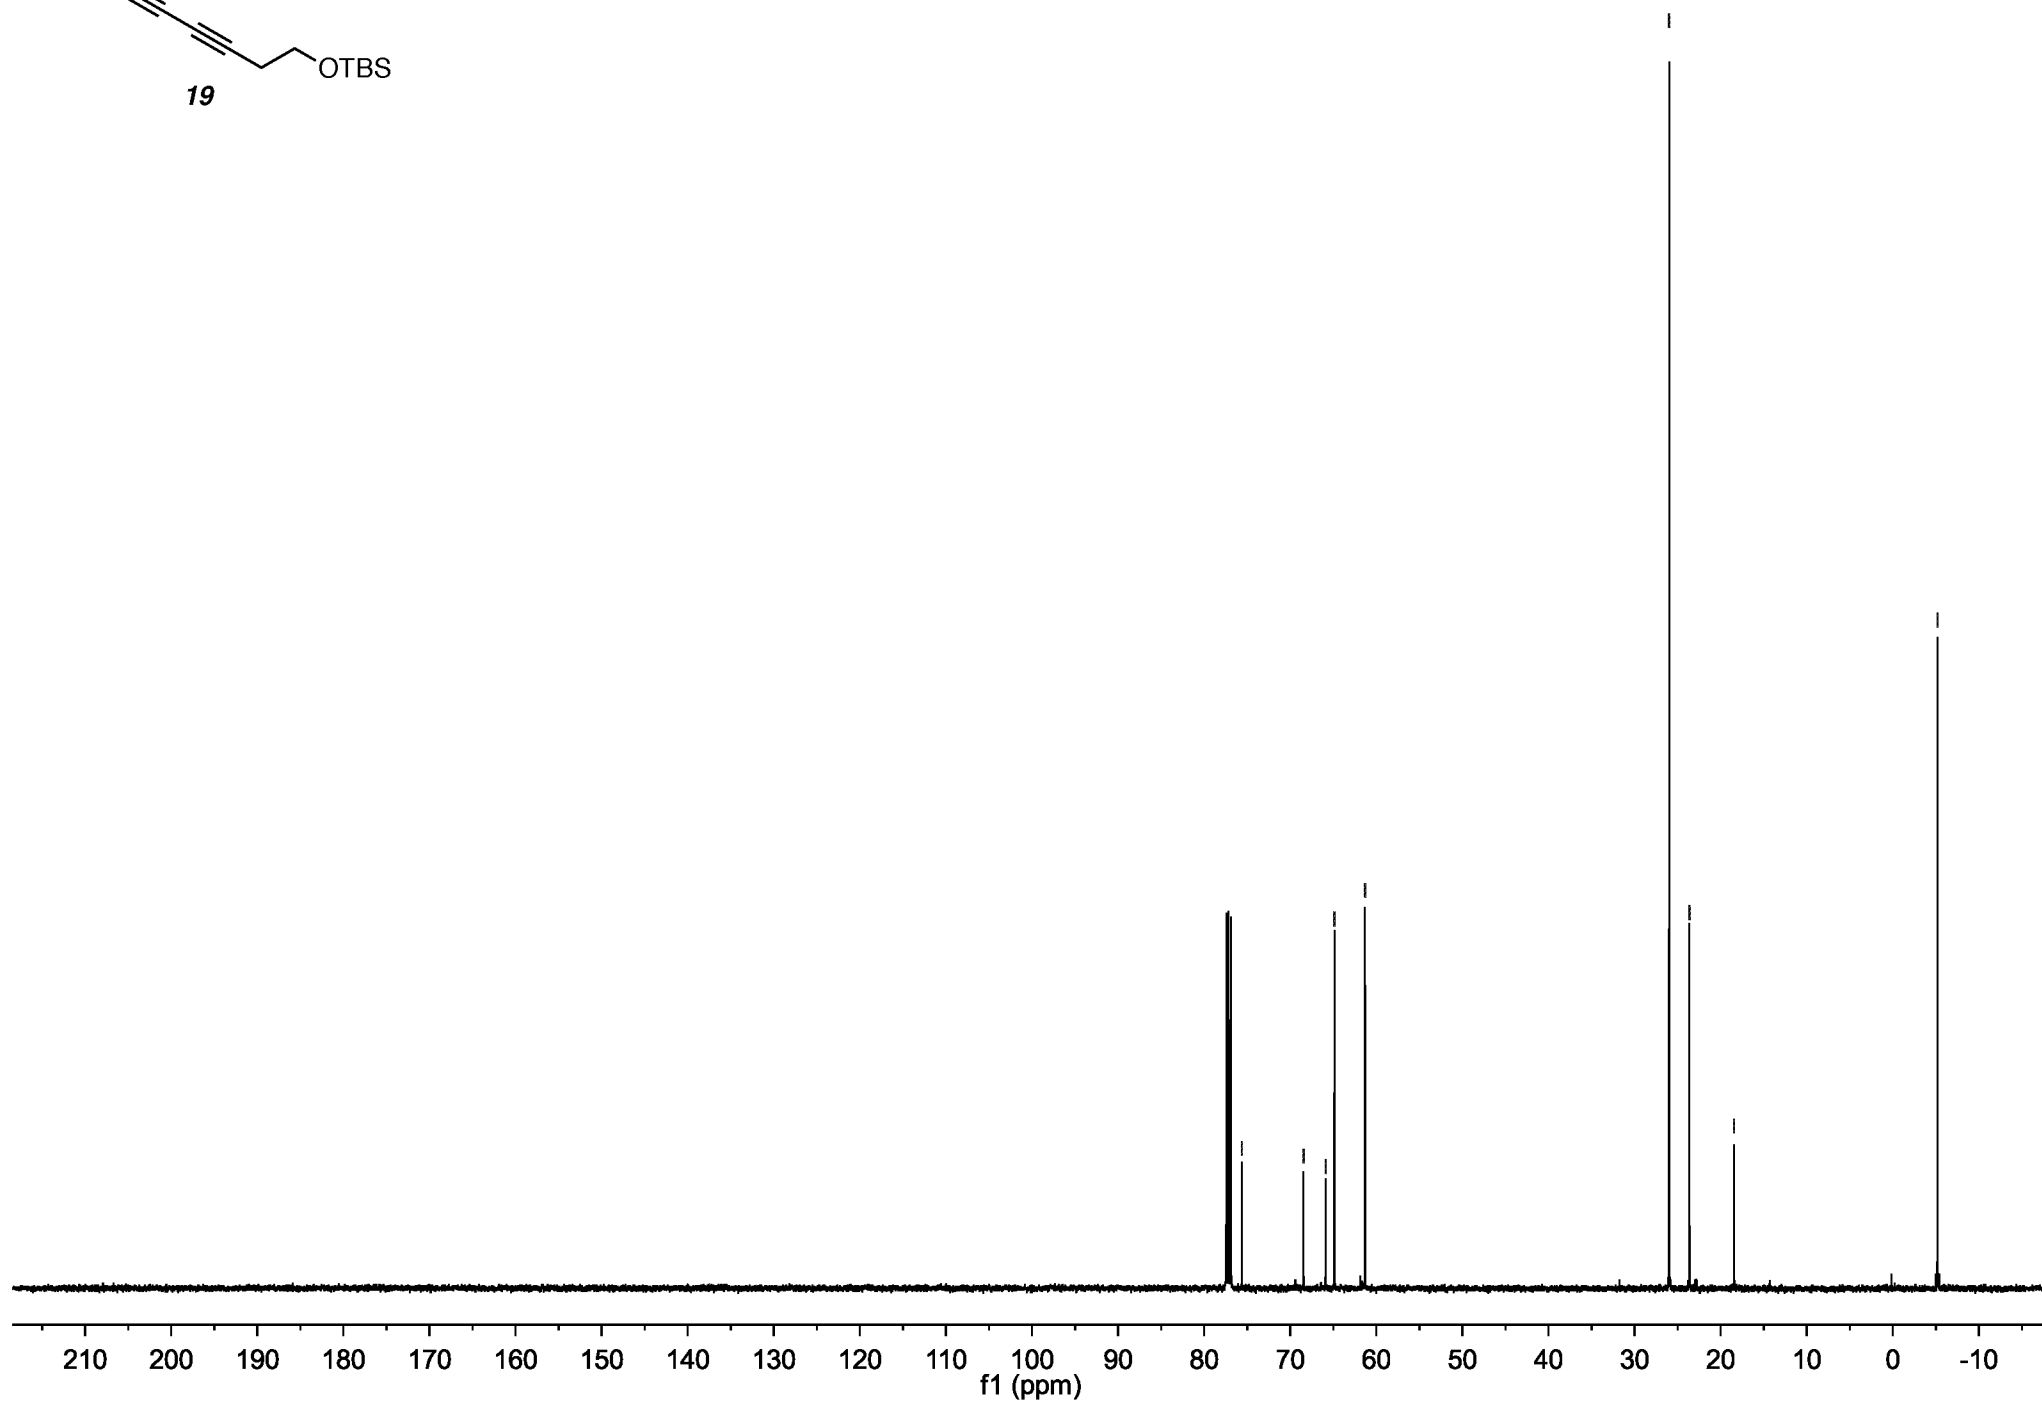

500 MHz, CDCl<sub>3</sub>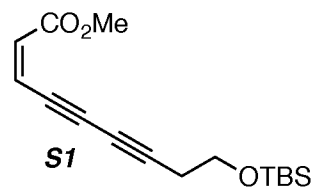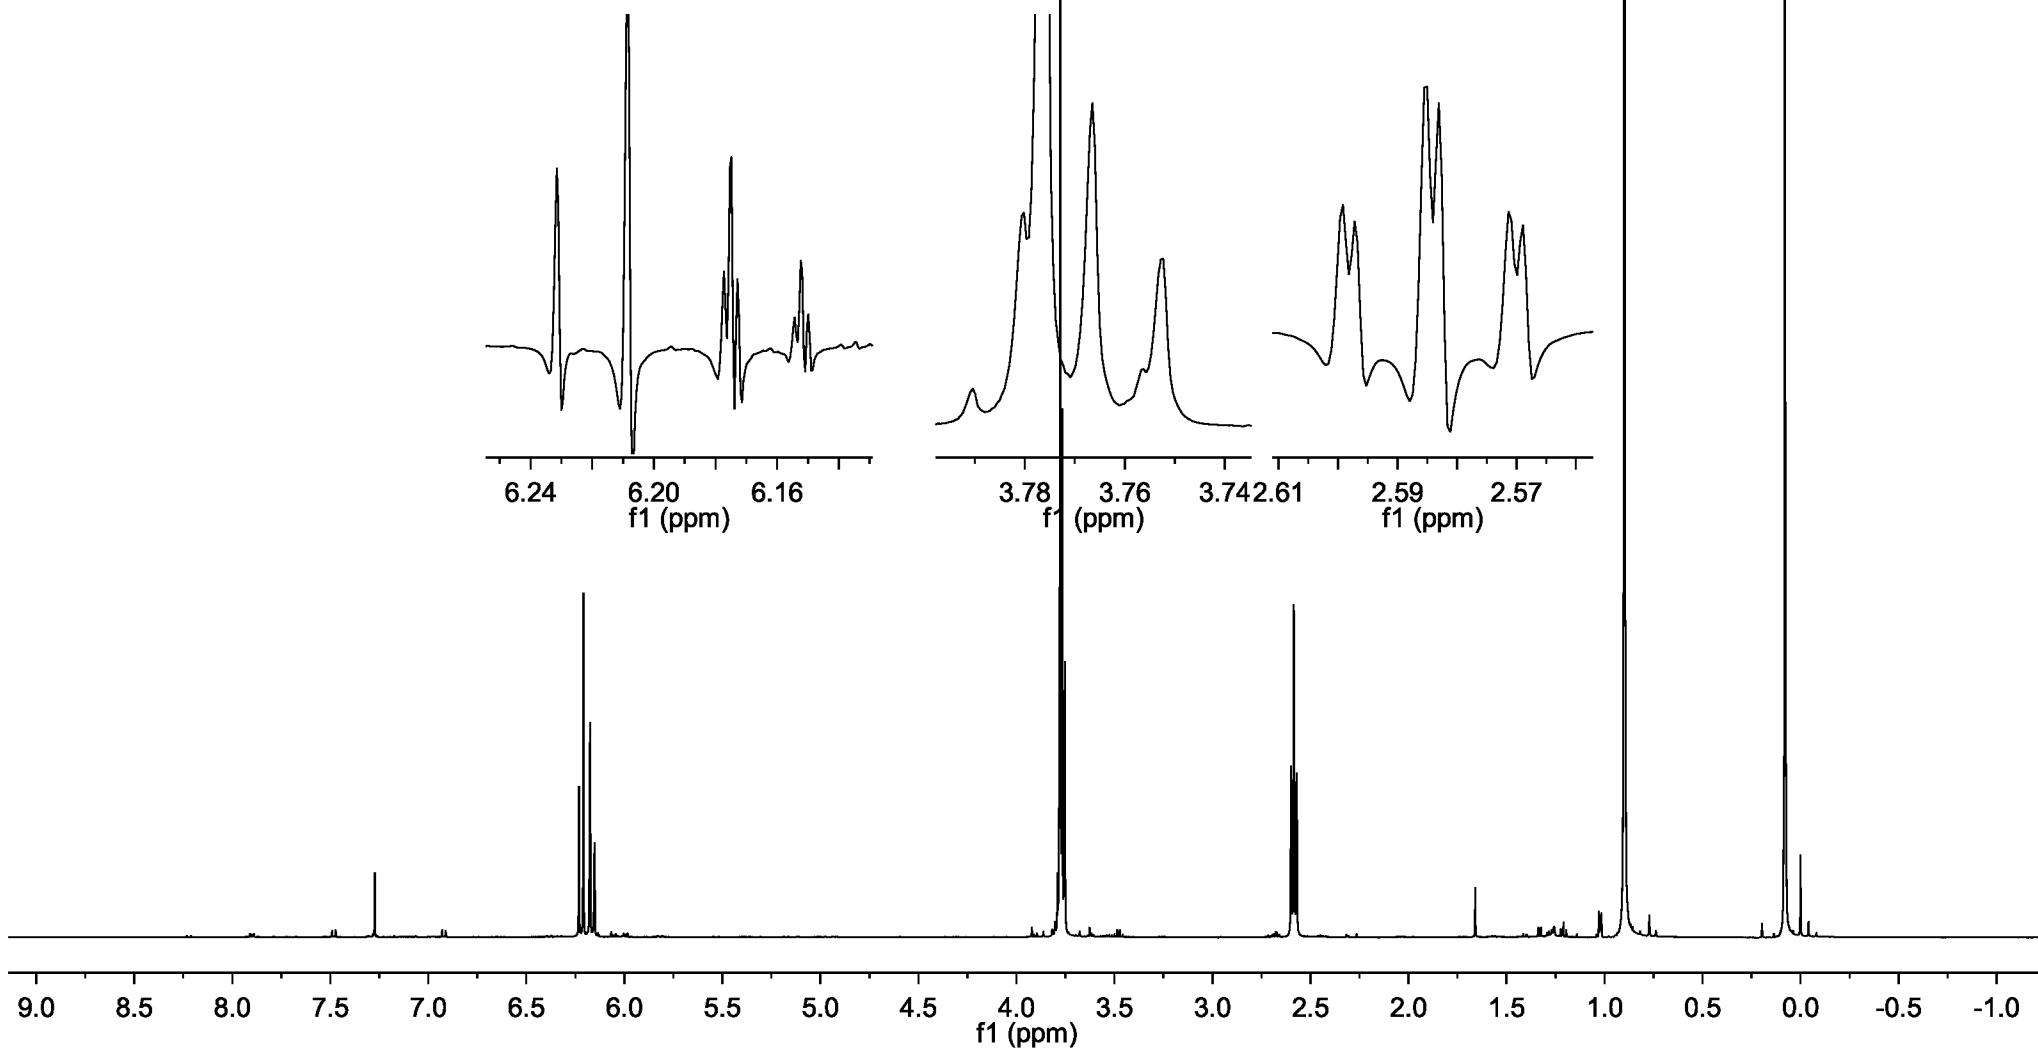

125 MHz, CDCl<sub>3</sub>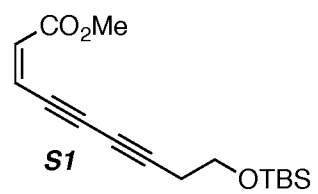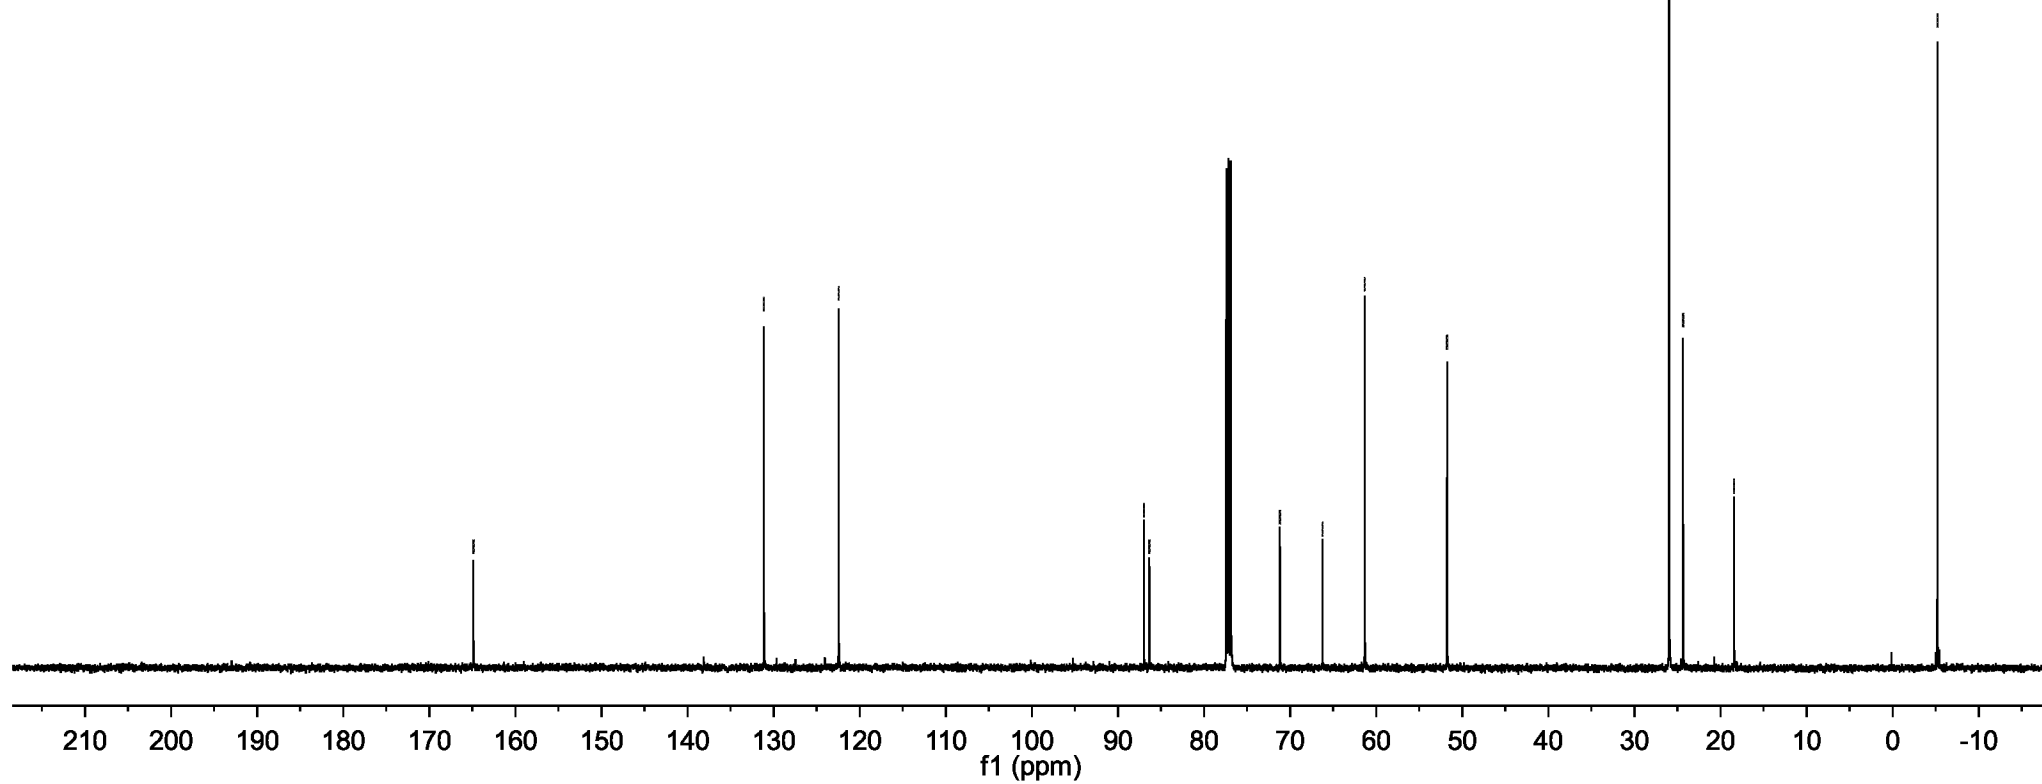



500 MHz, CDCl<sub>3</sub>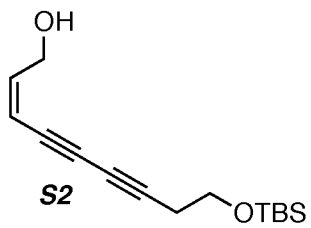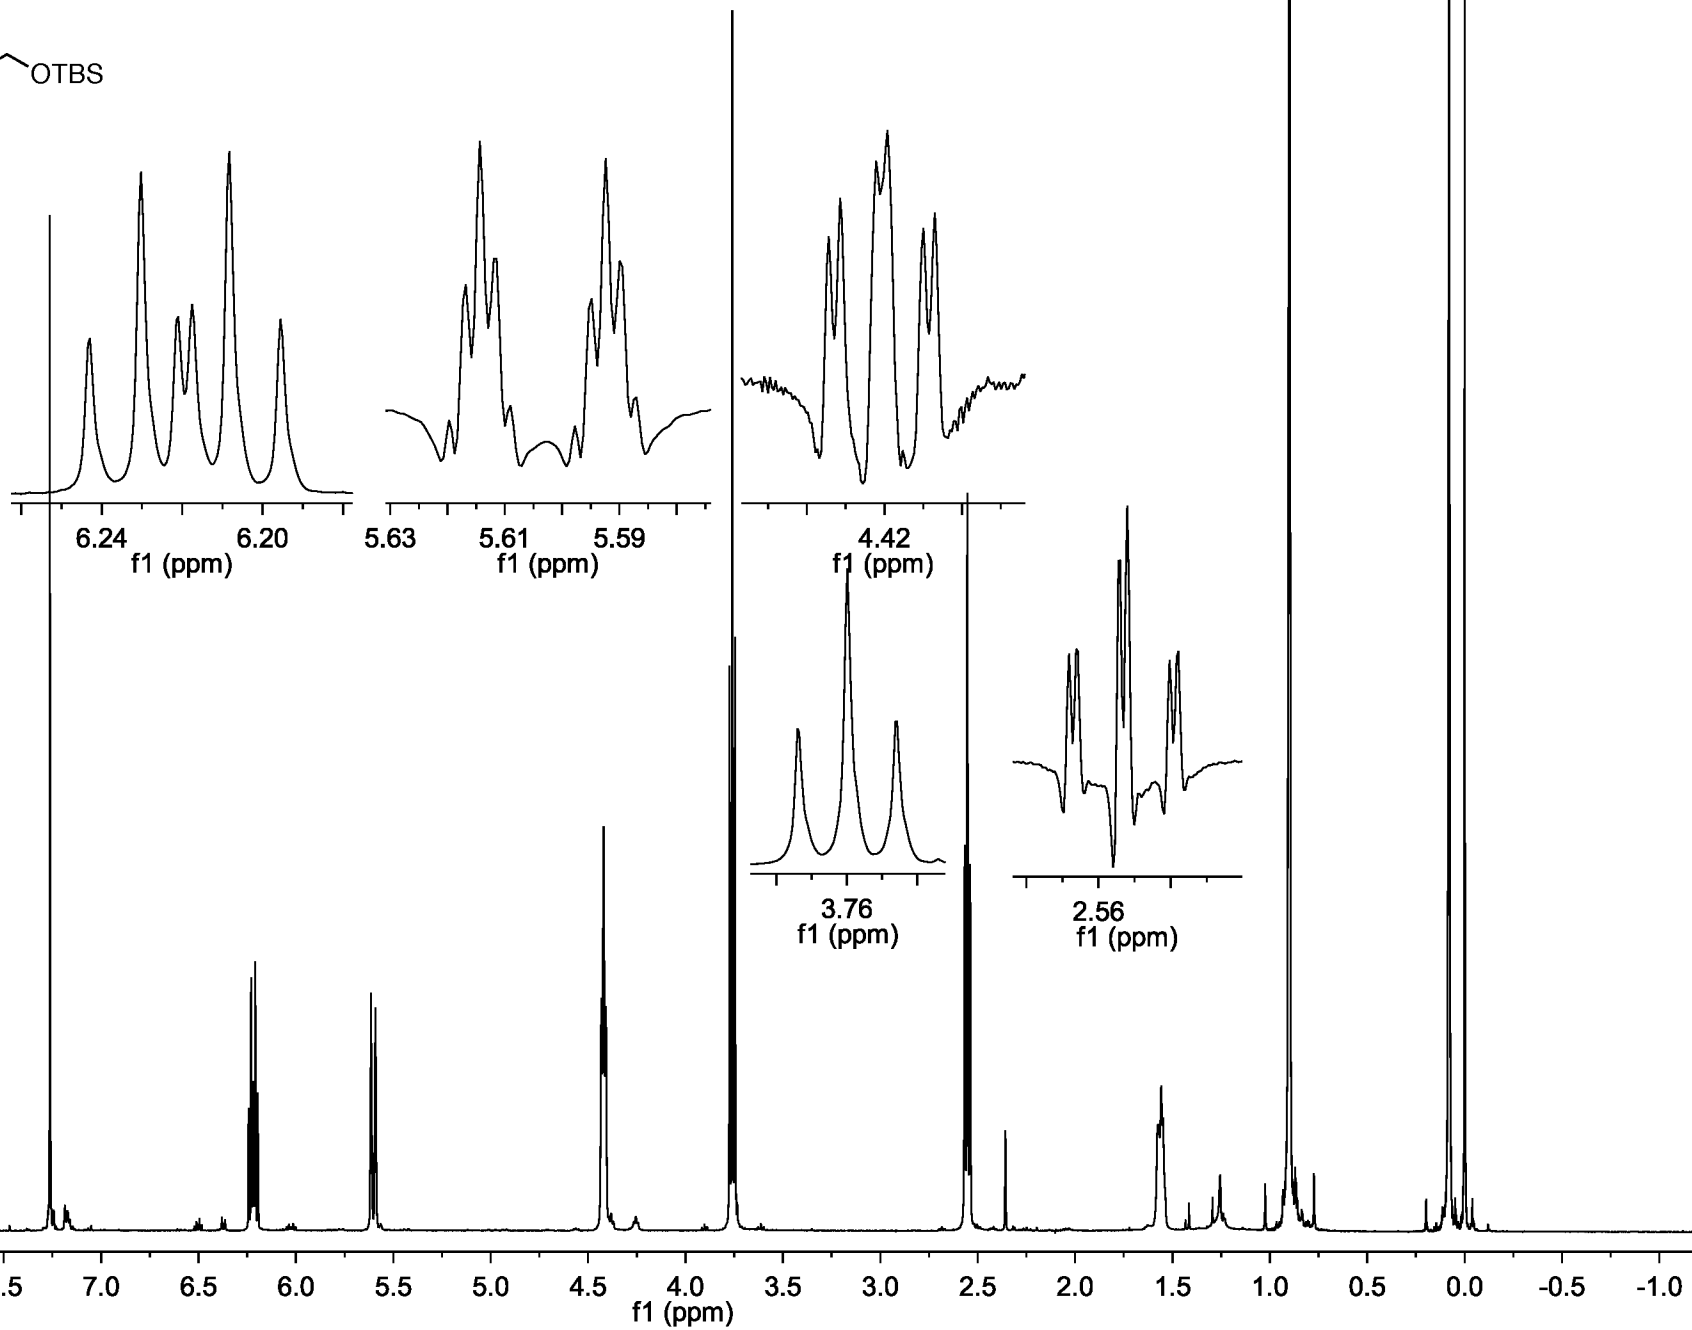

125 MHz, CDCl<sub>3</sub>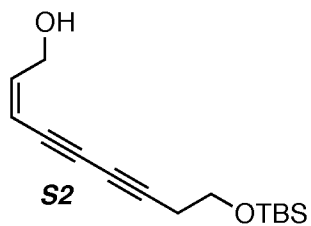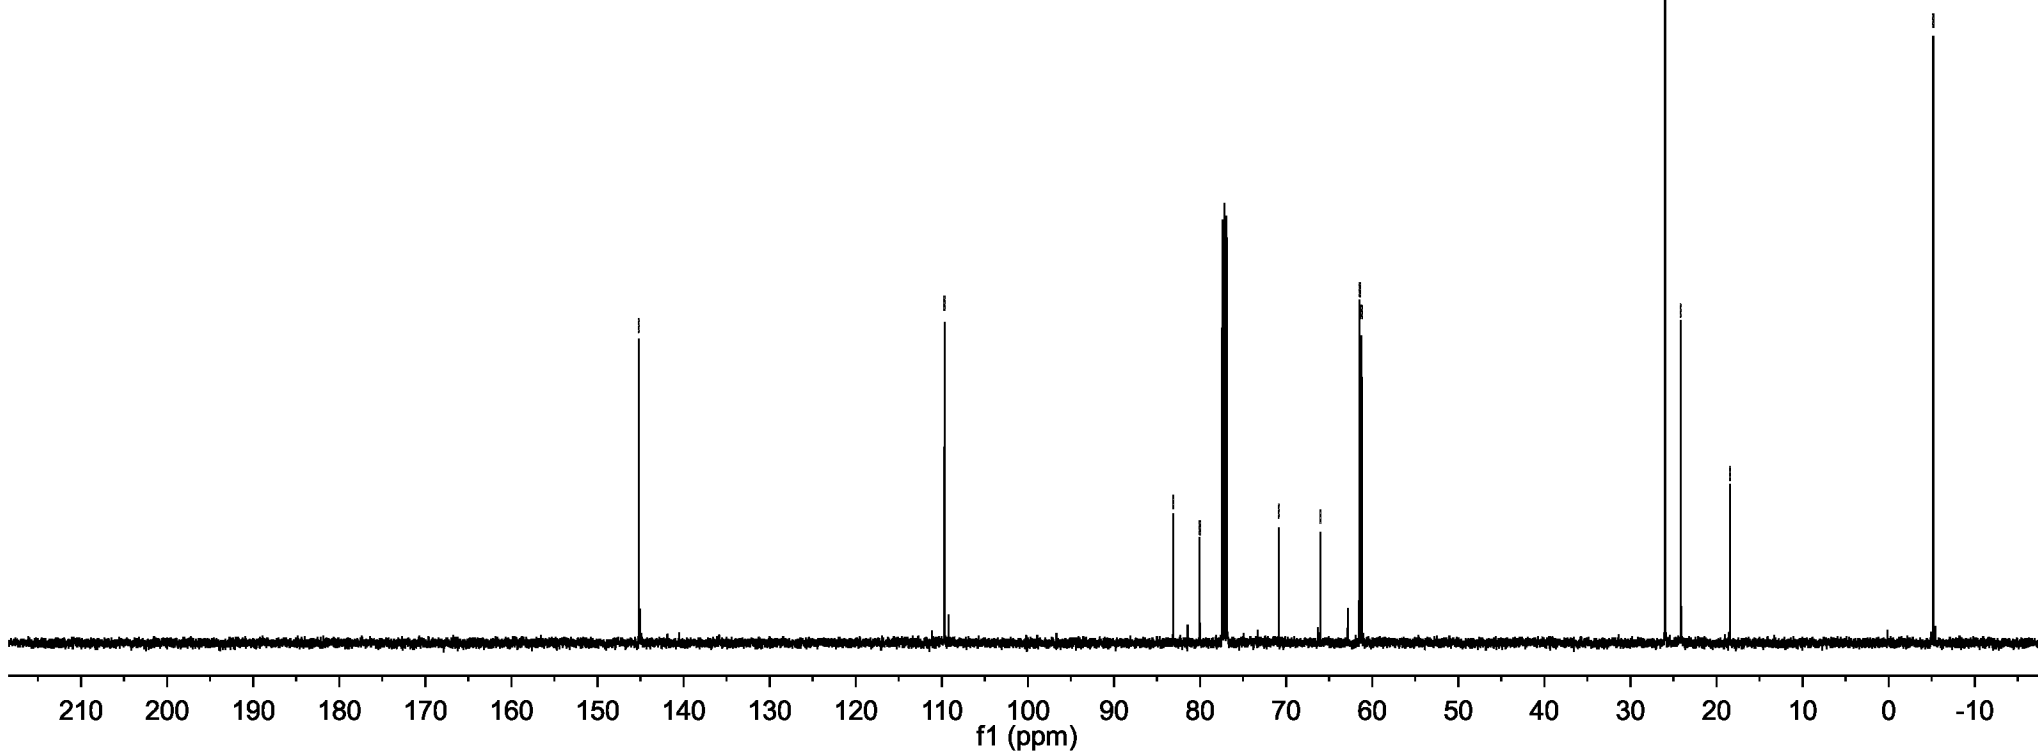

300 MHz, CDCl<sub>3</sub>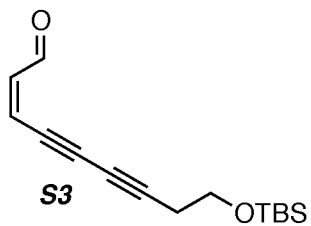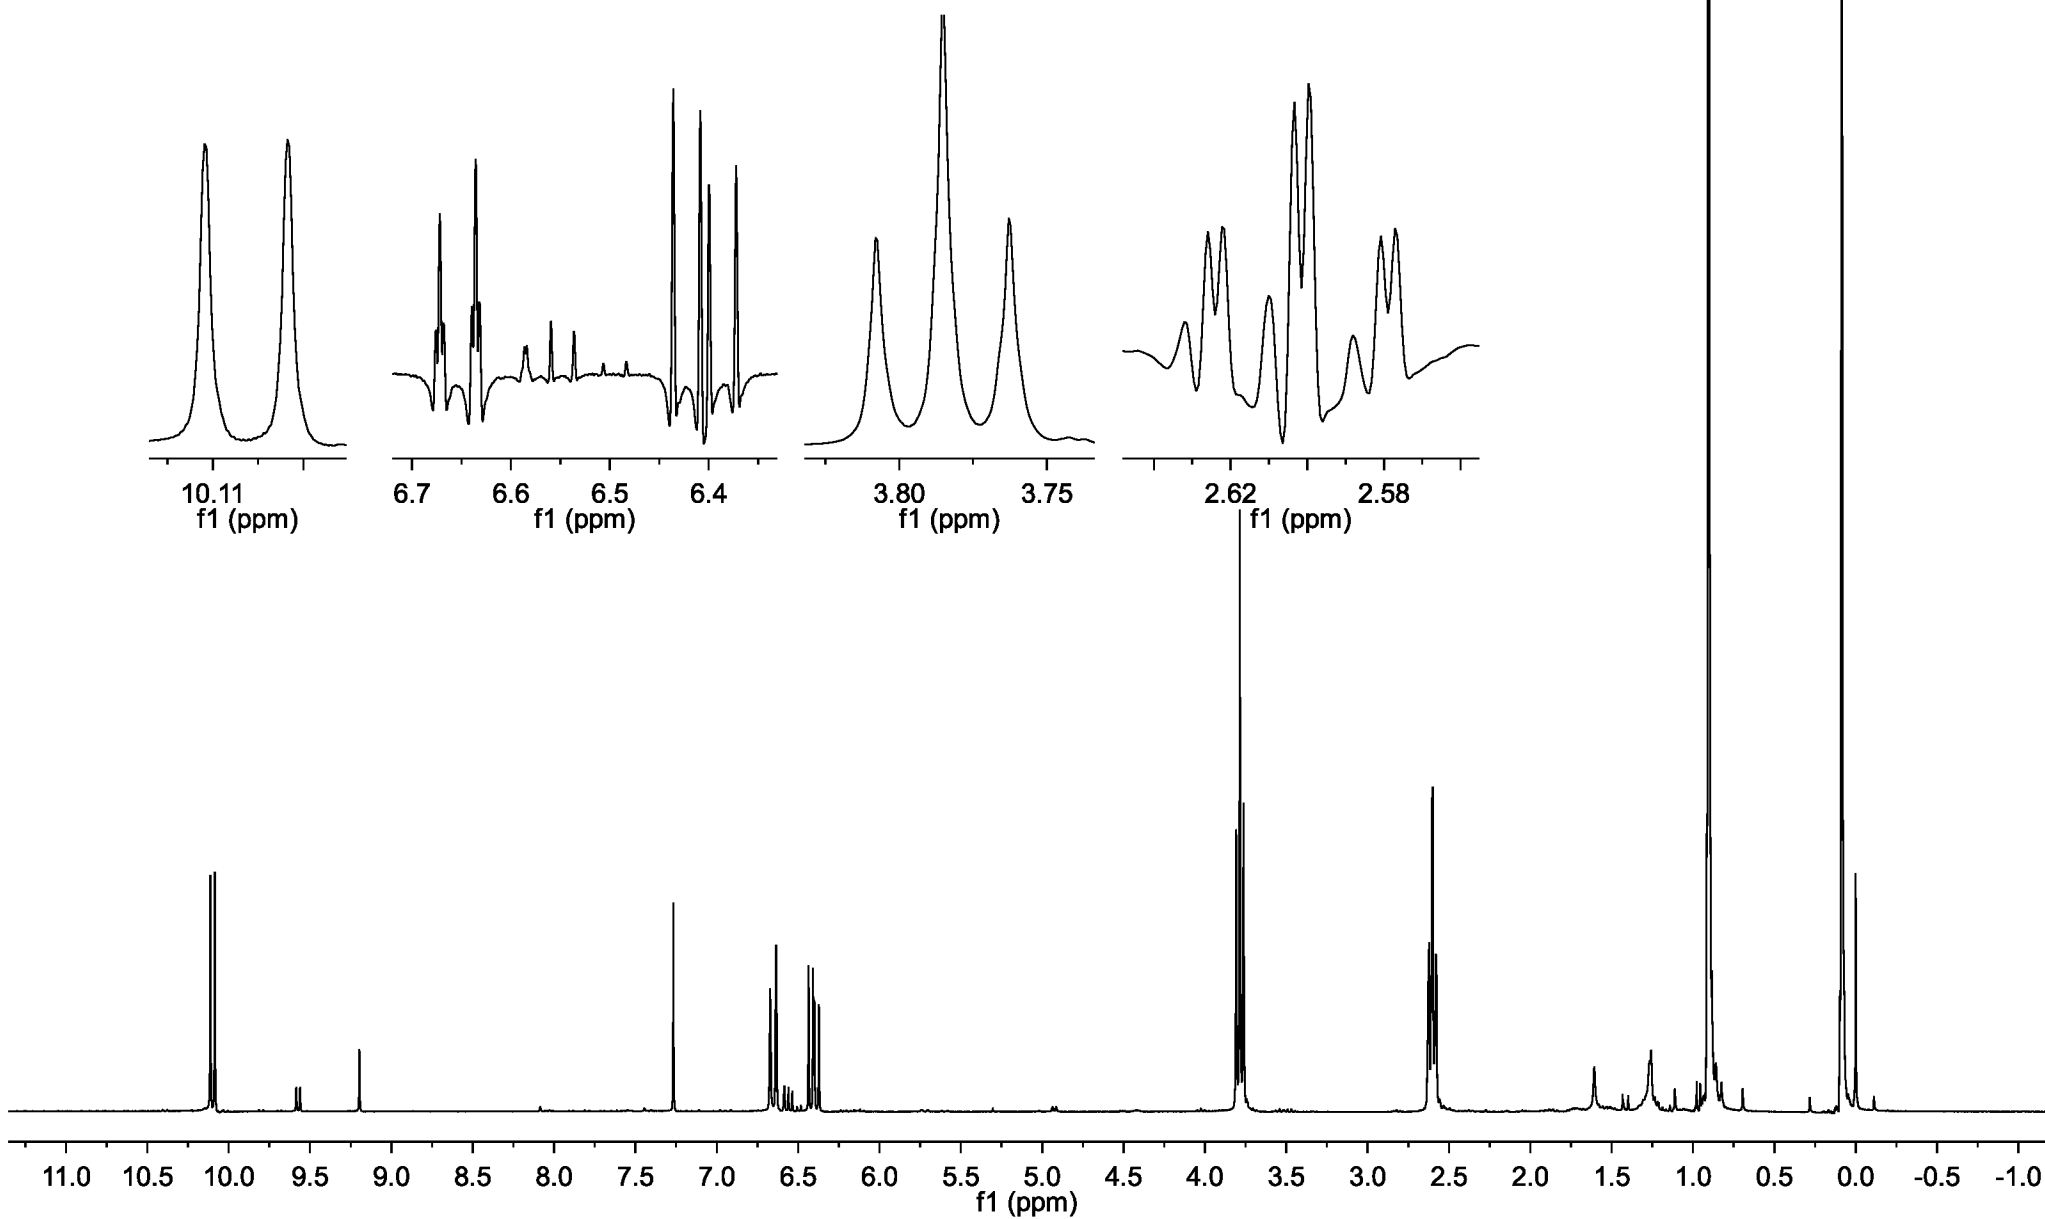

75 MHz, CDCl<sub>3</sub>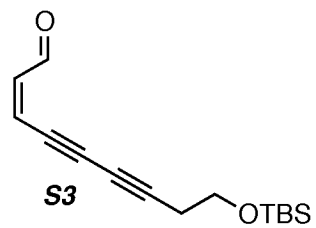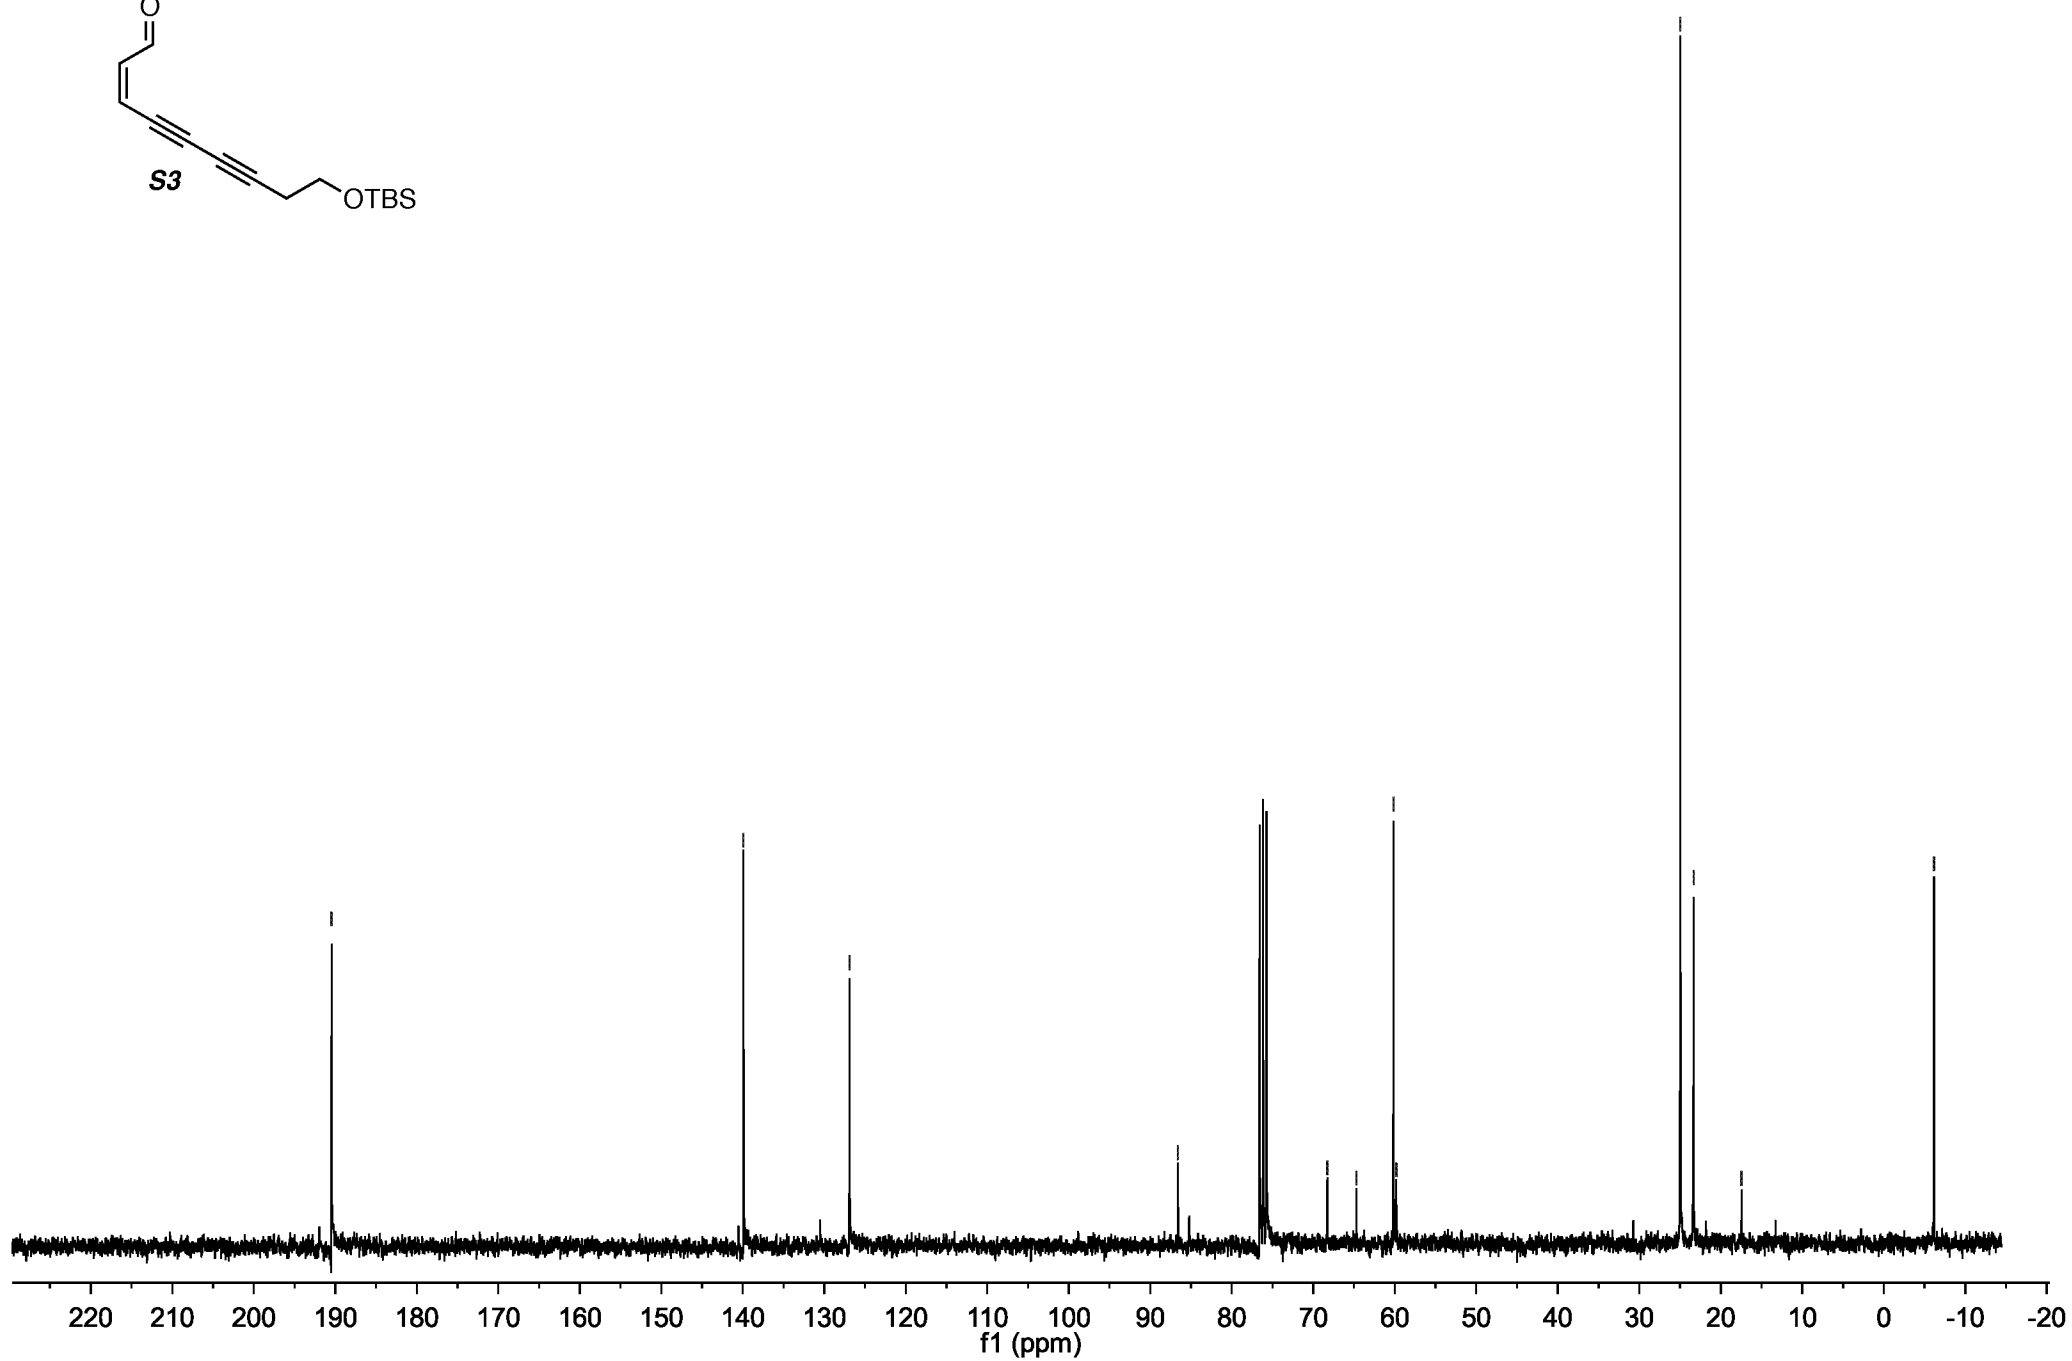

300 MHz, CDCl<sub>3</sub>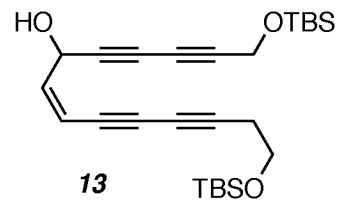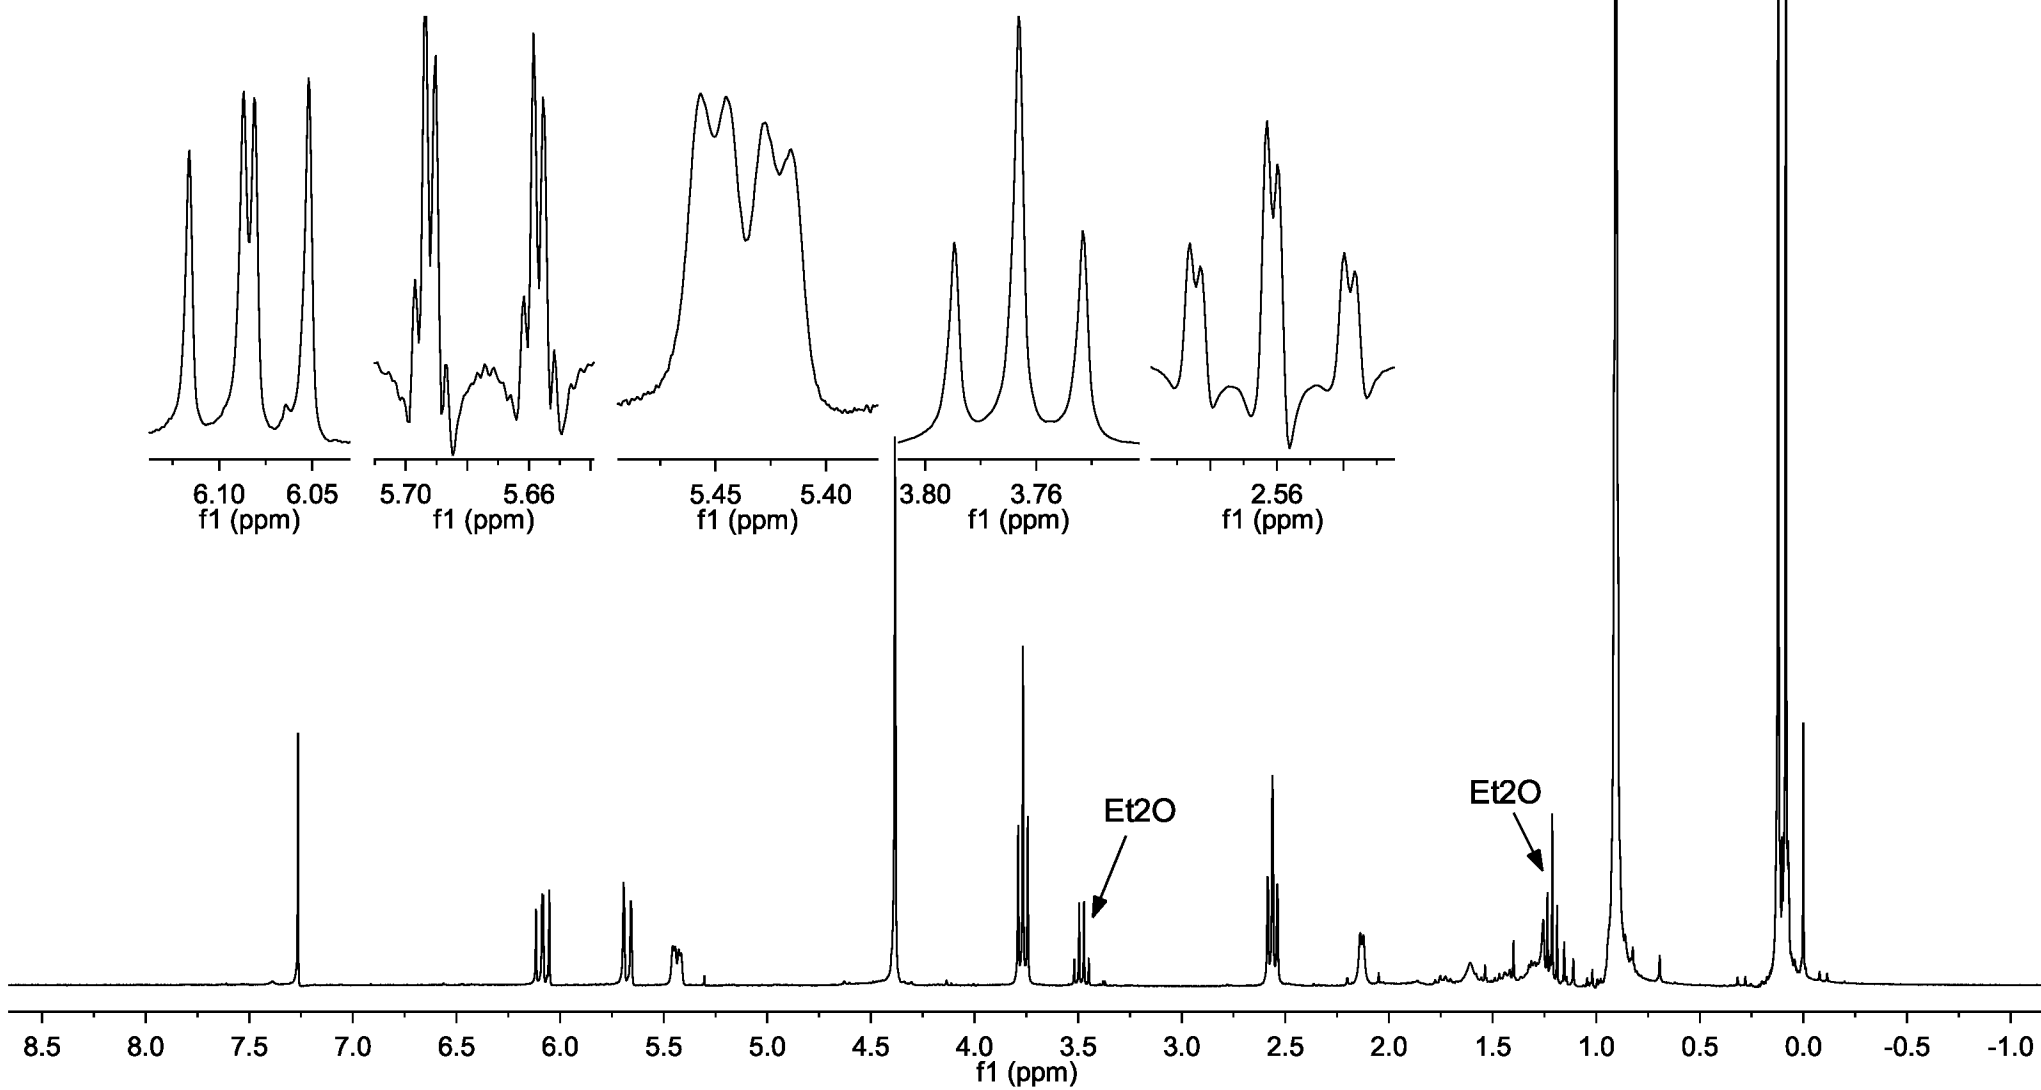

125 MHz, CDCl<sub>3</sub>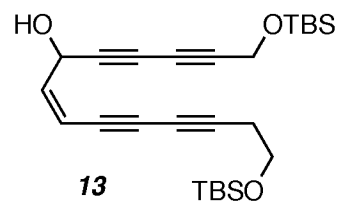**13**

TBSO

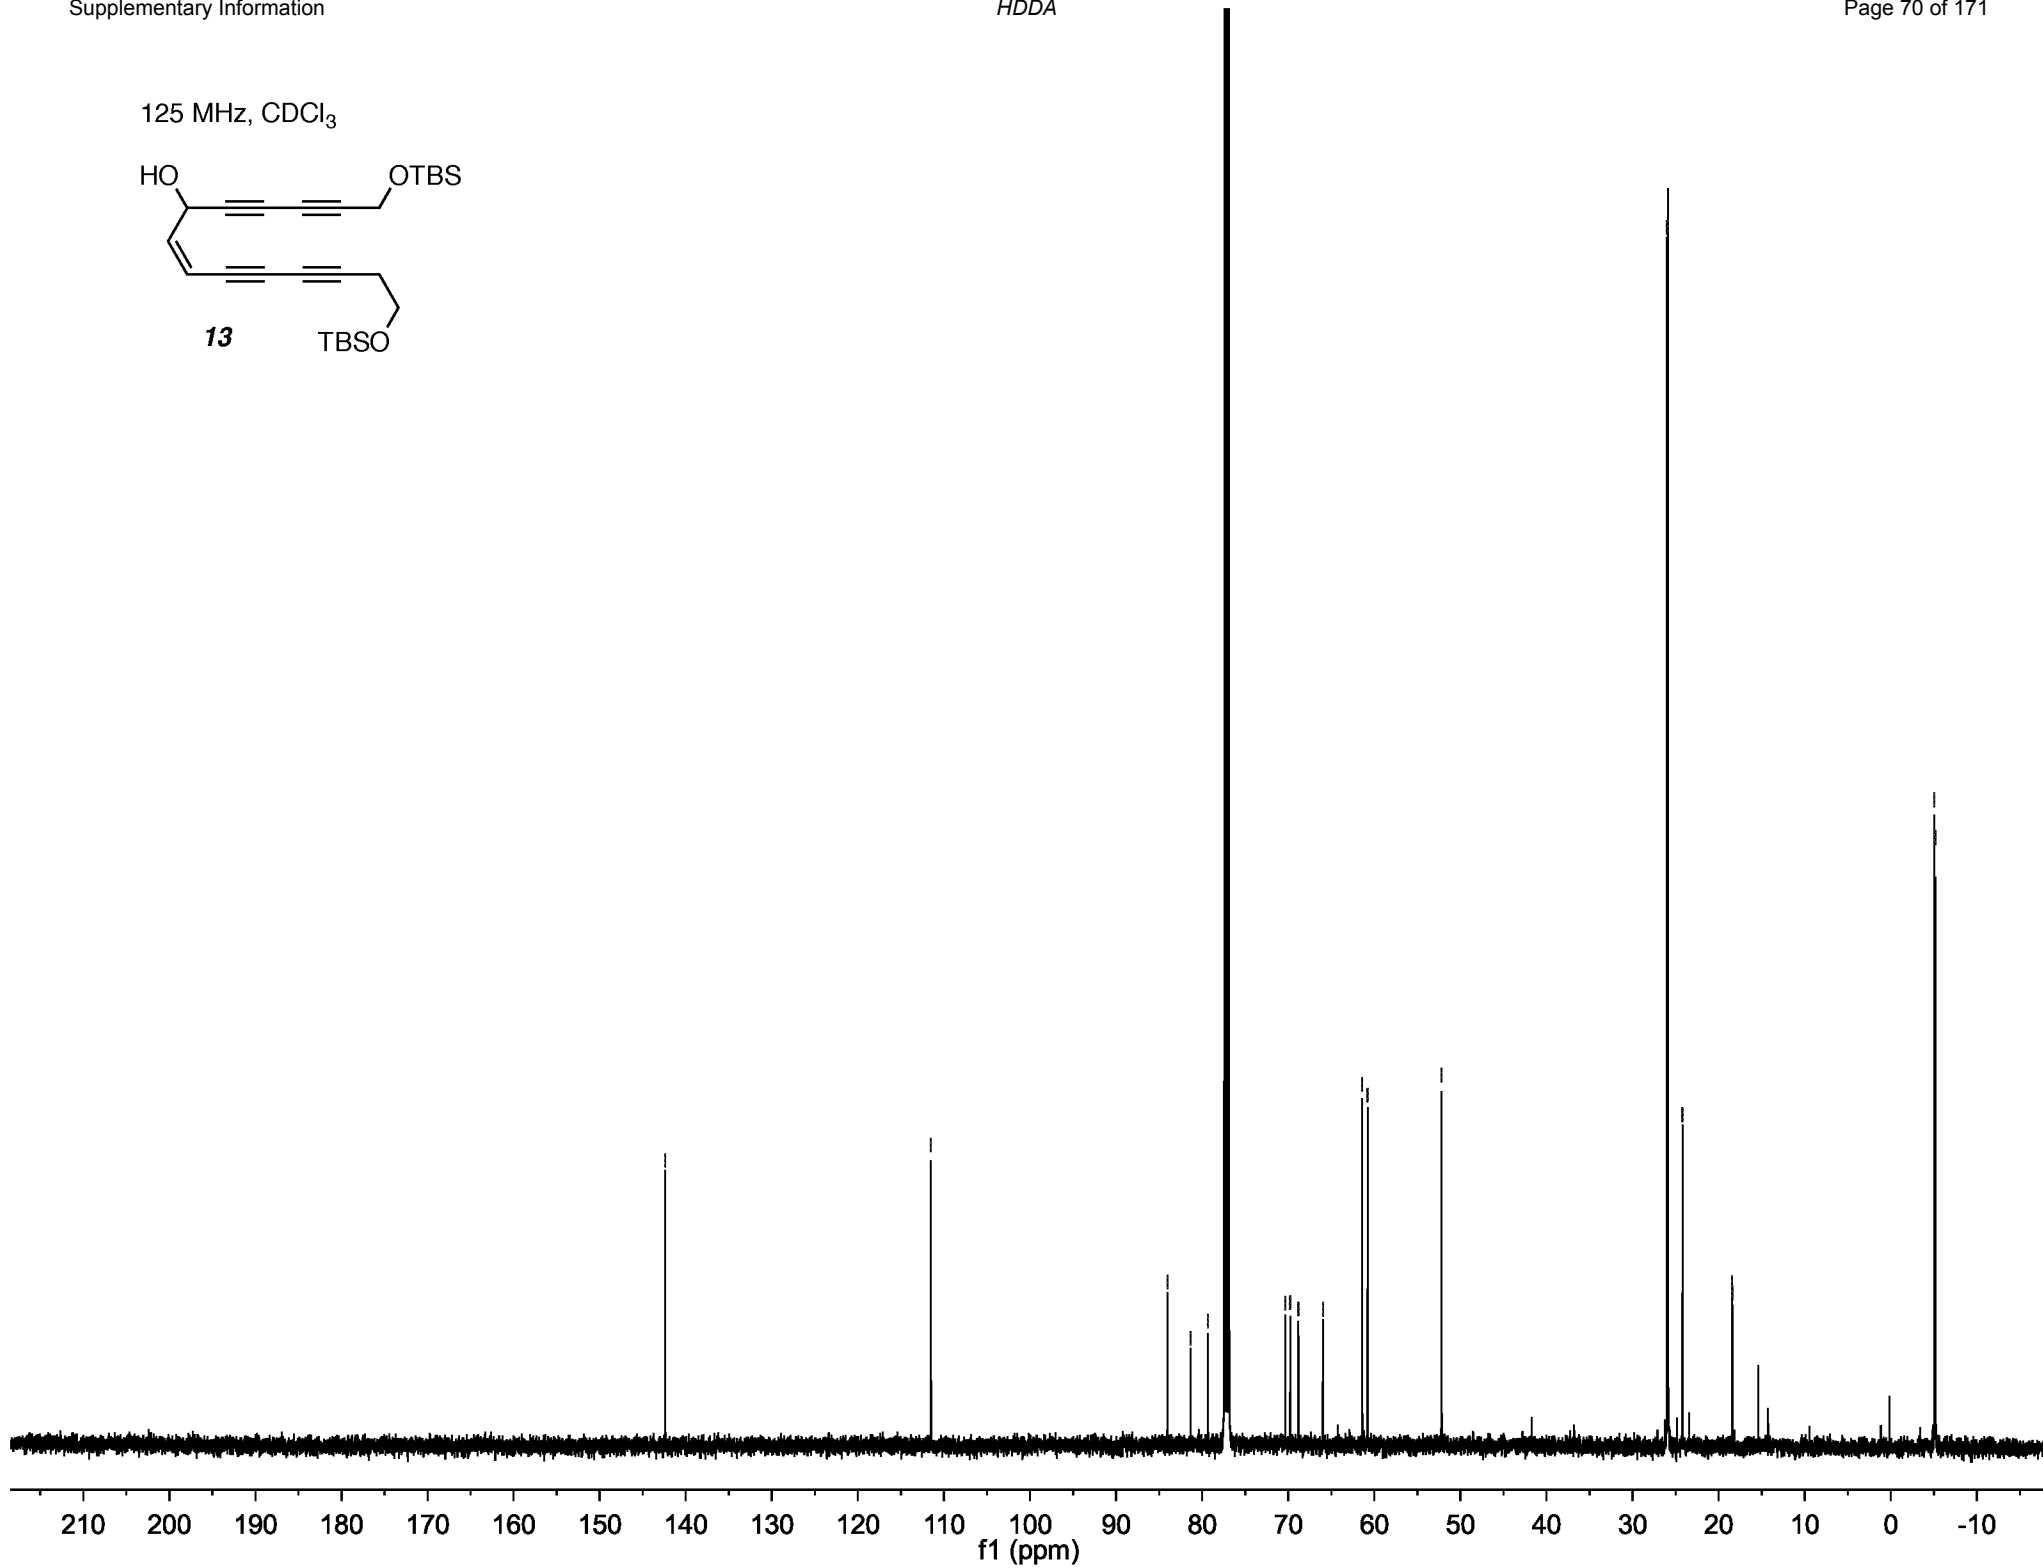

500 MHz, CDCl<sub>3</sub>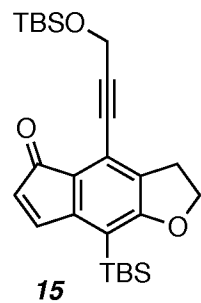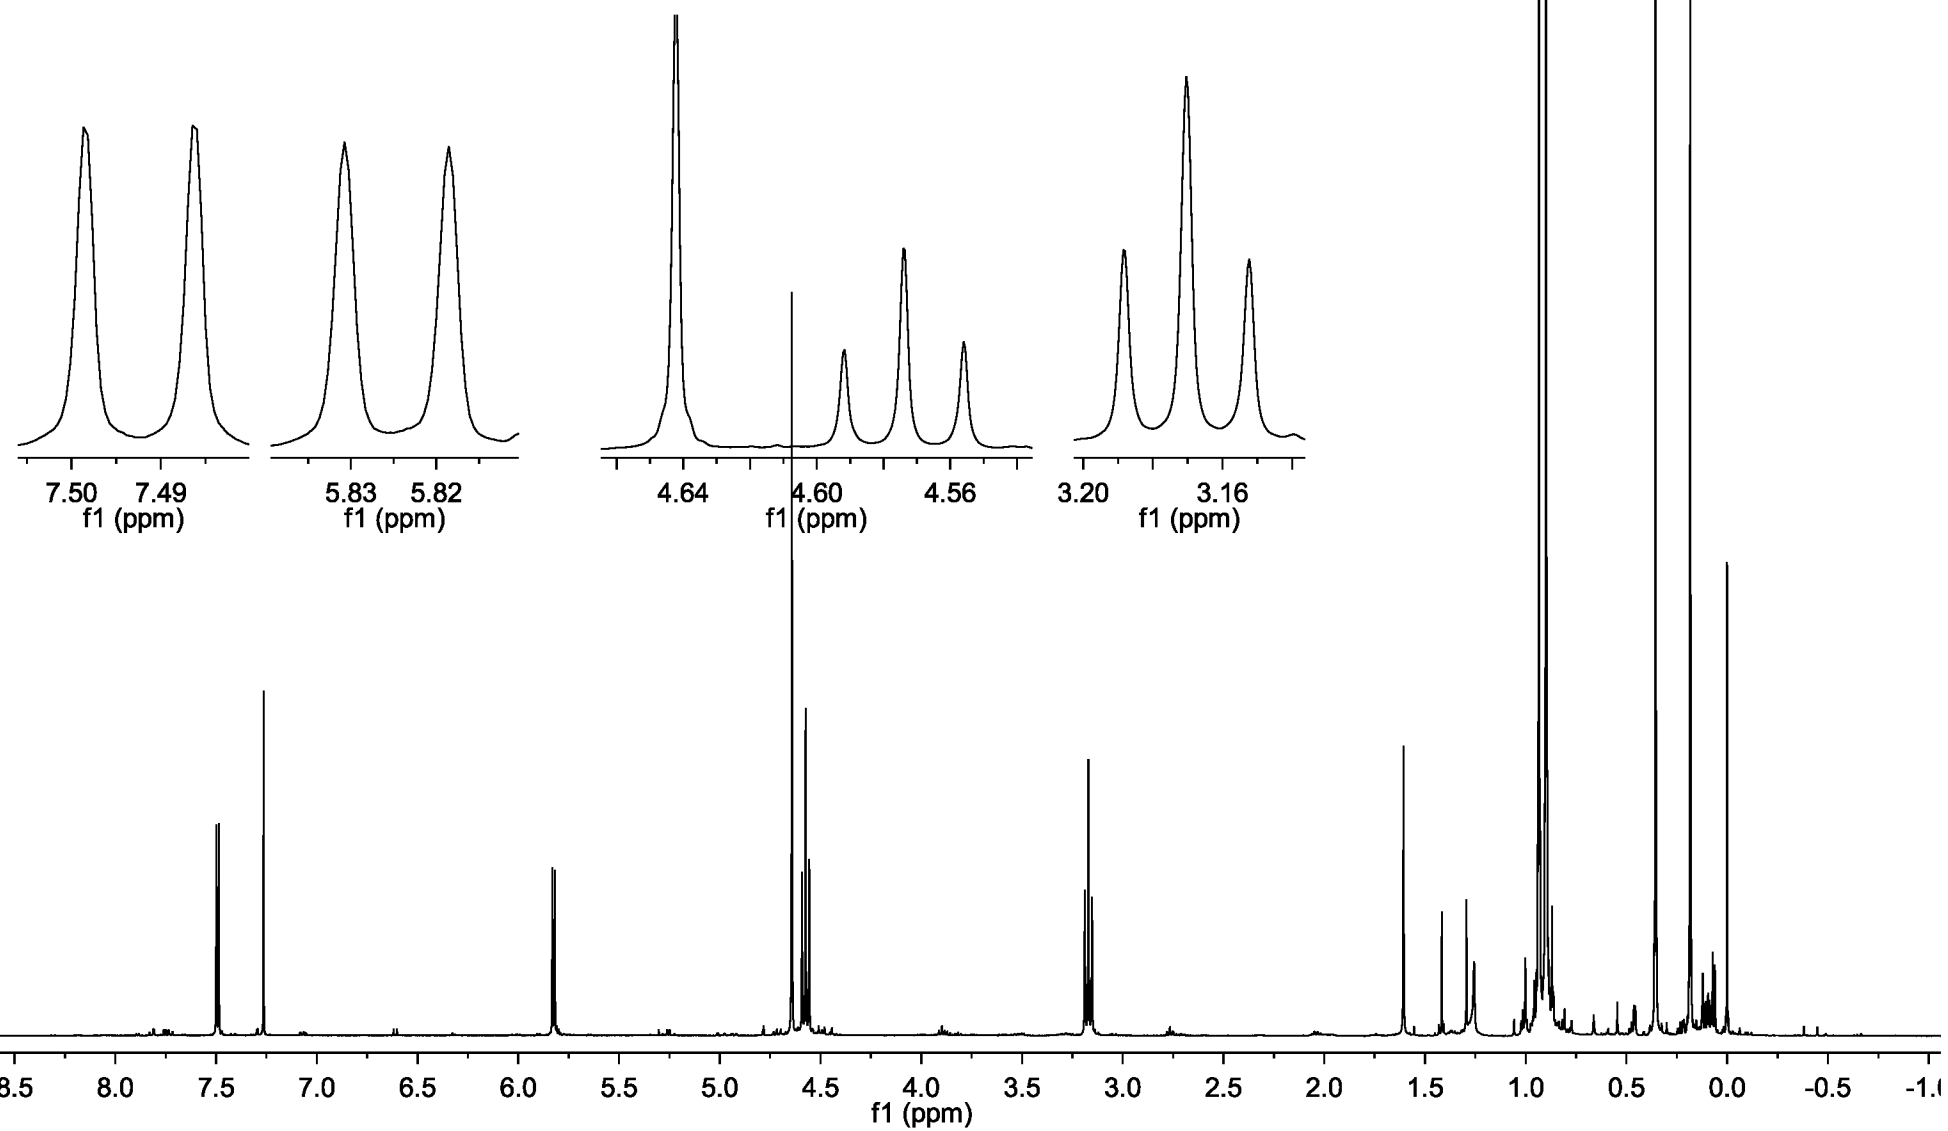

125 MHz, CDCl<sub>3</sub>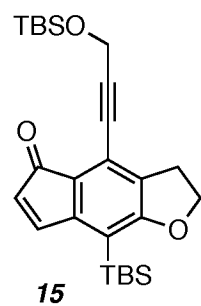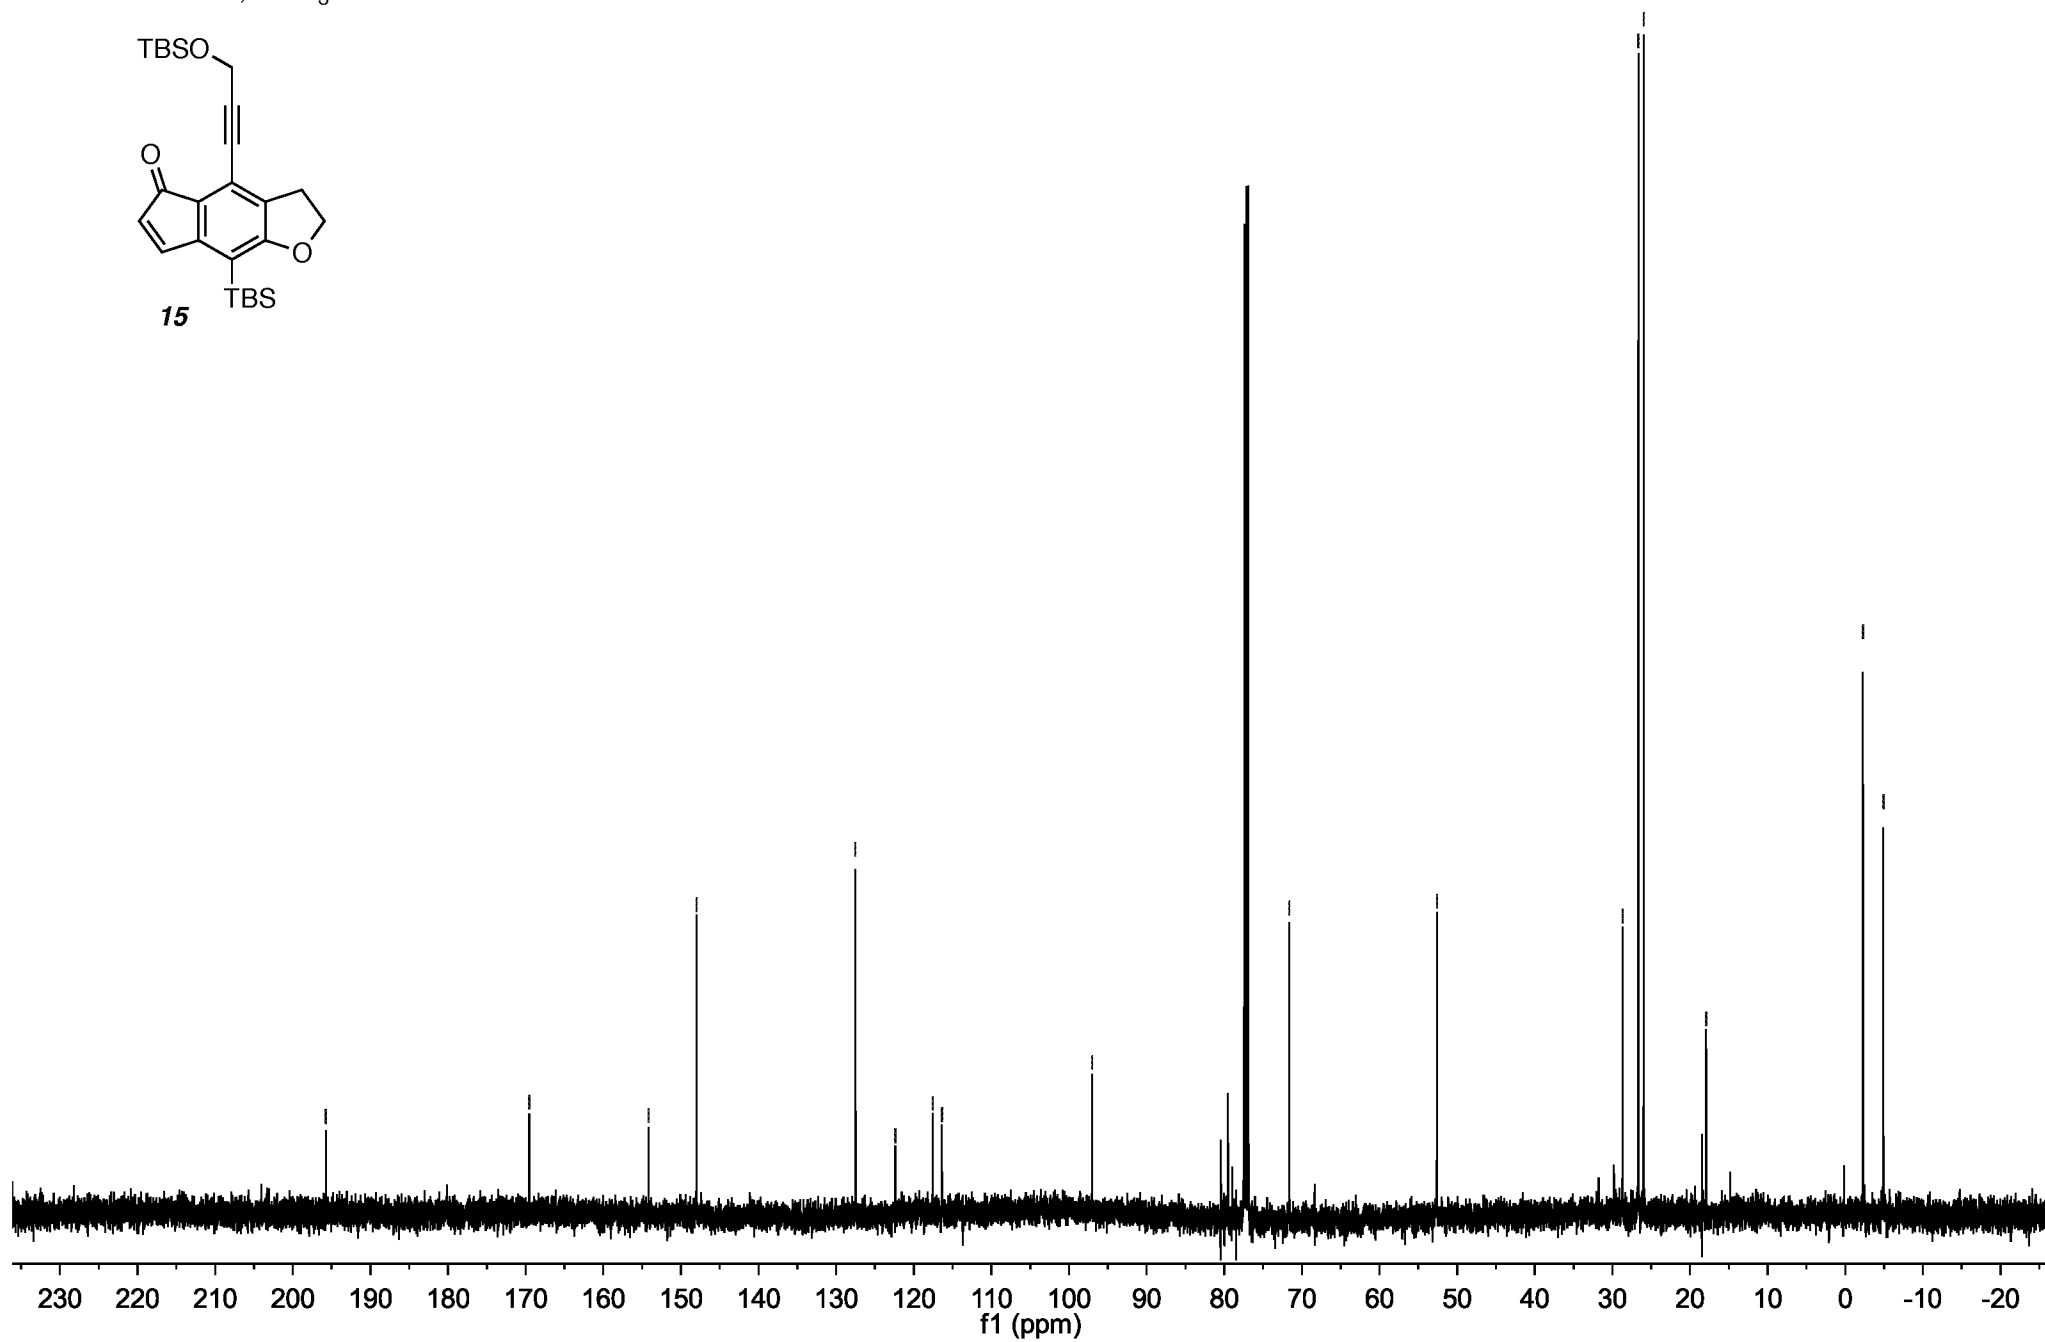



500 MHz, CDCl<sub>3</sub>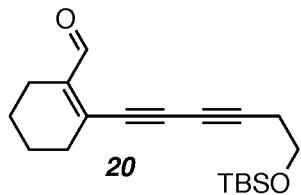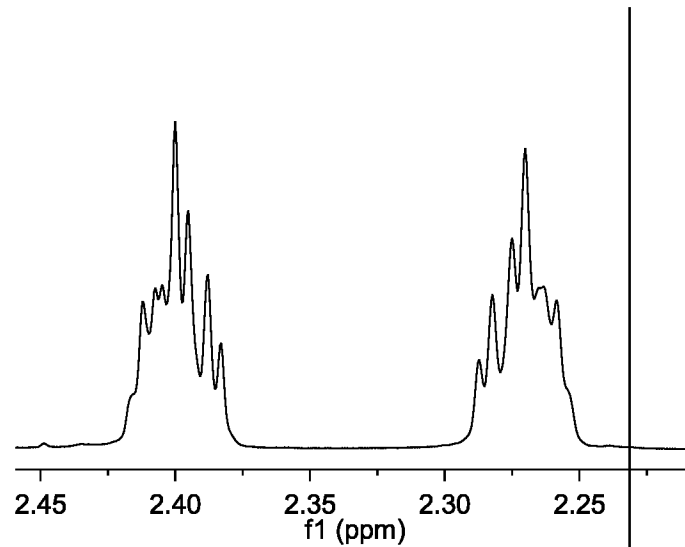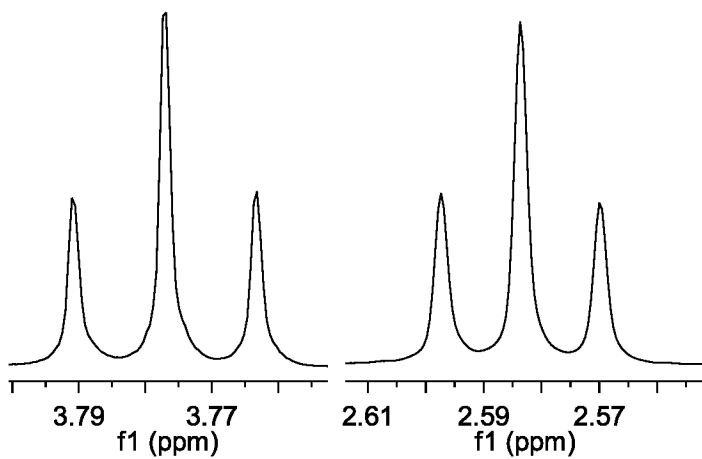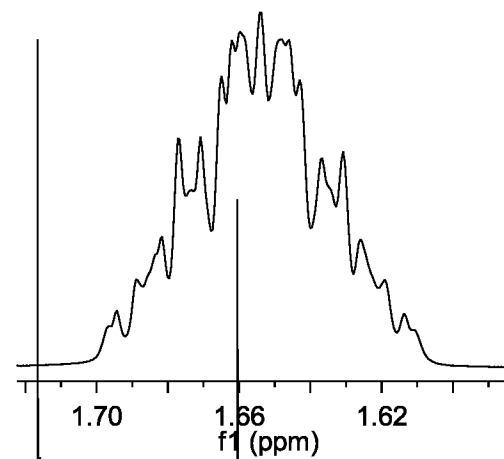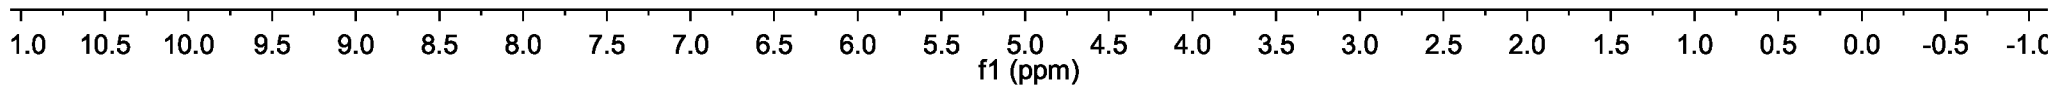

125 MHz, CDCl<sub>3</sub>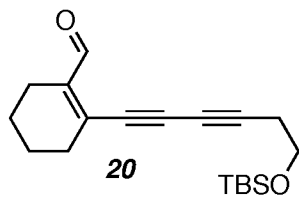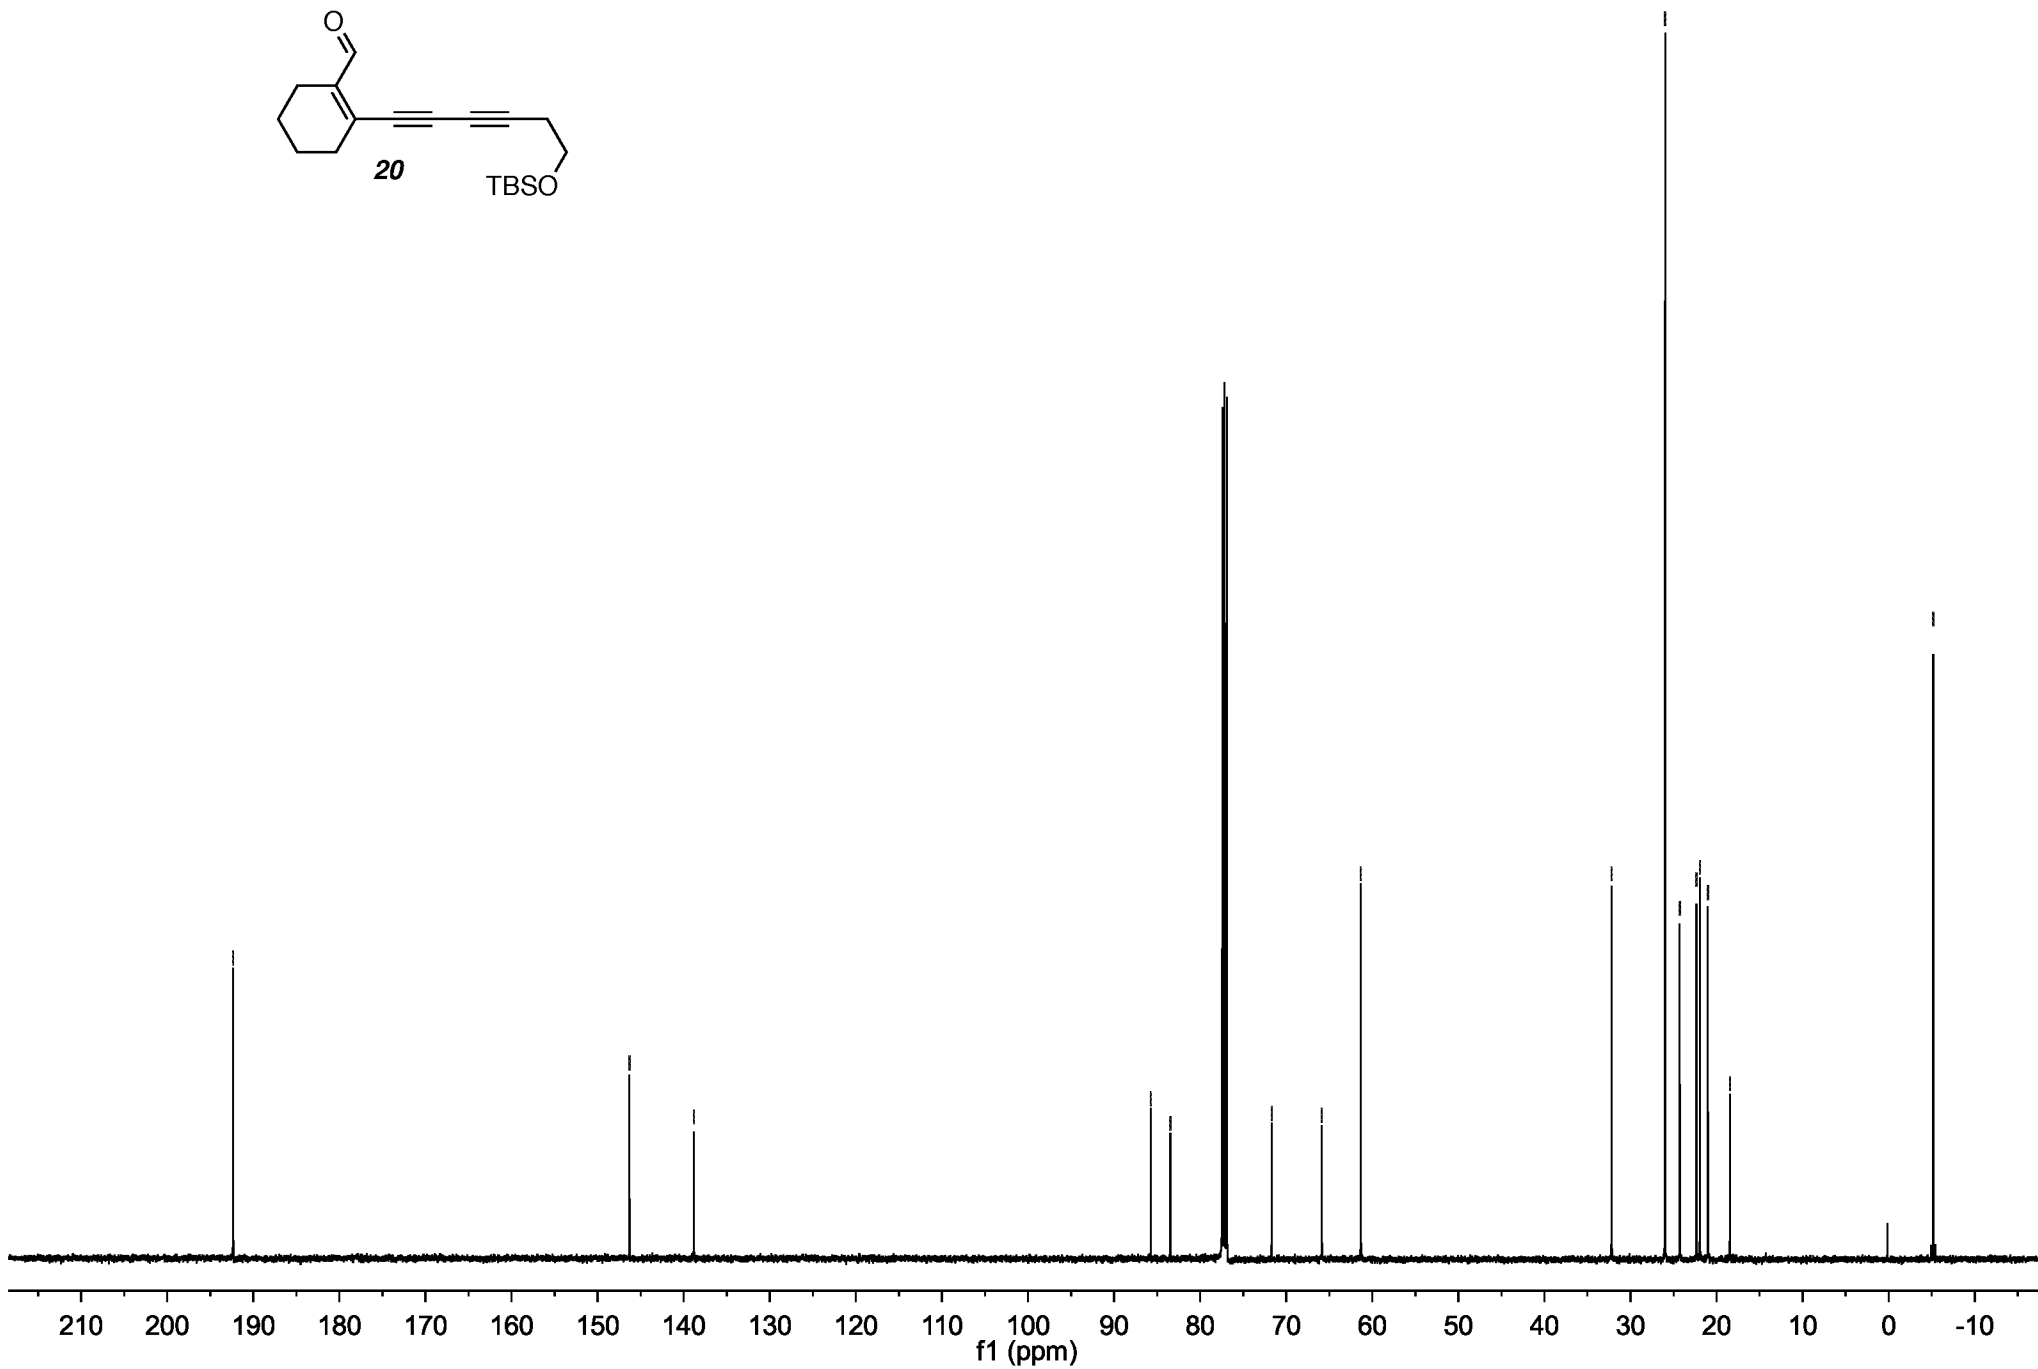

500 MHz, CDCl<sub>3</sub>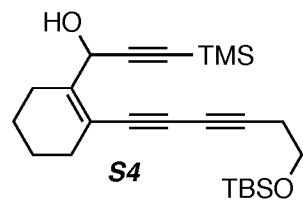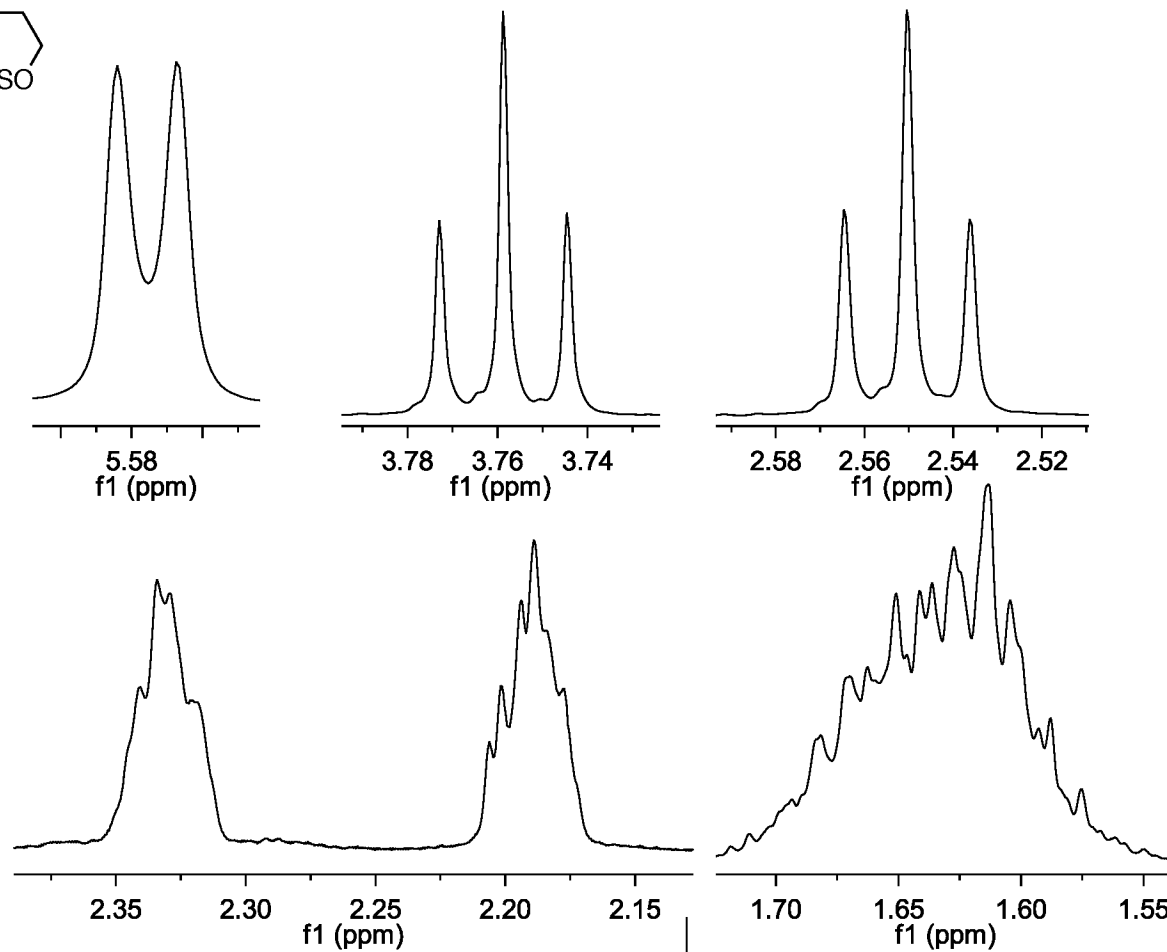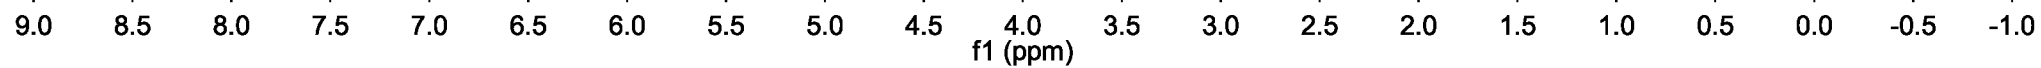

125 MHz, CDCl<sub>3</sub>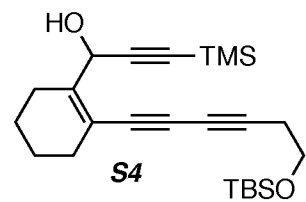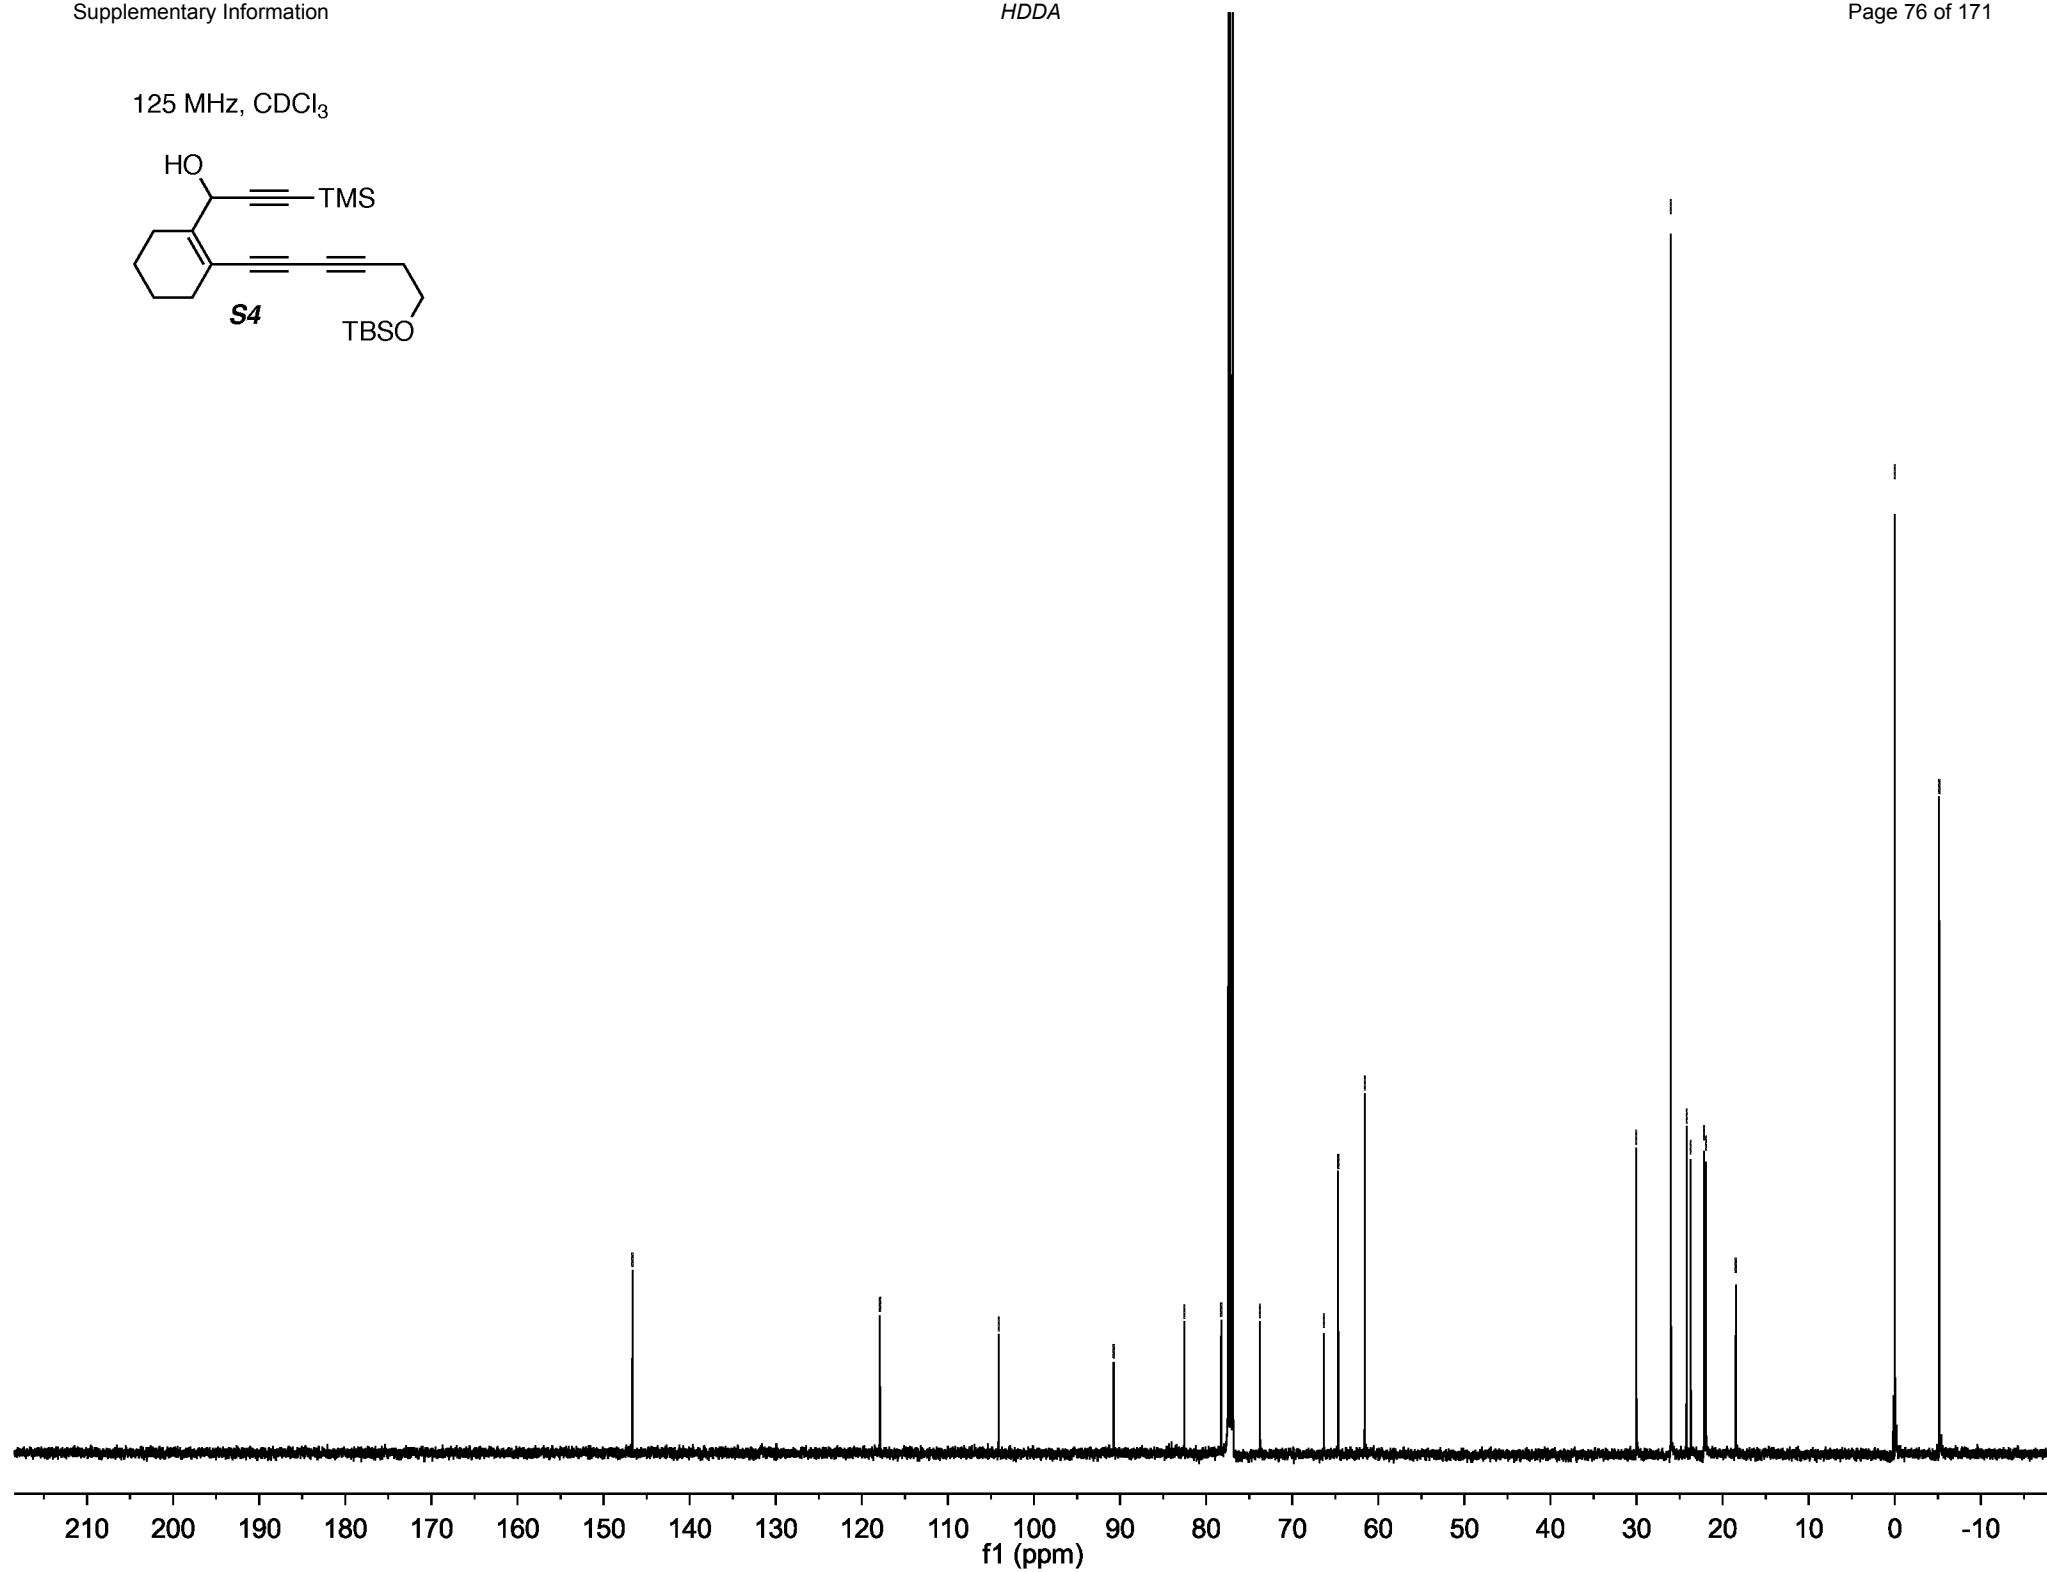

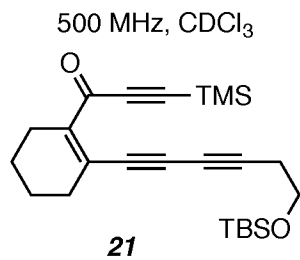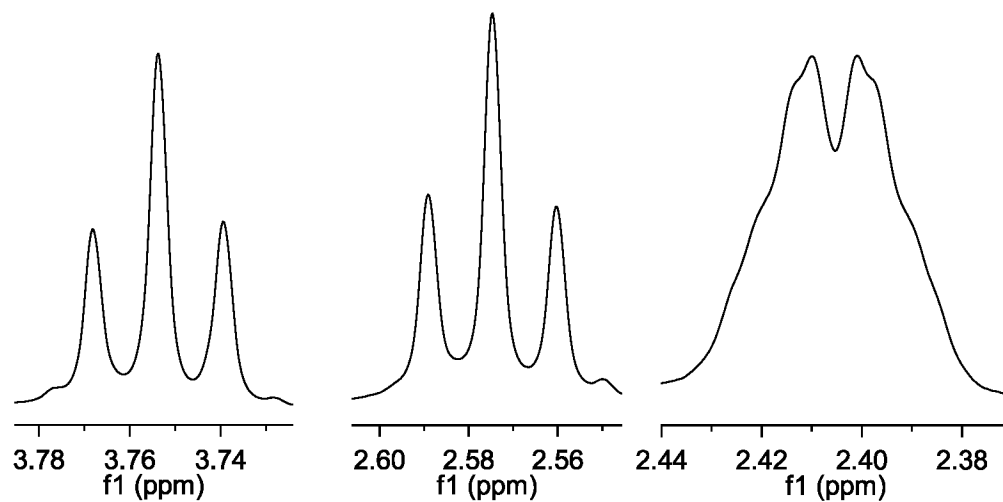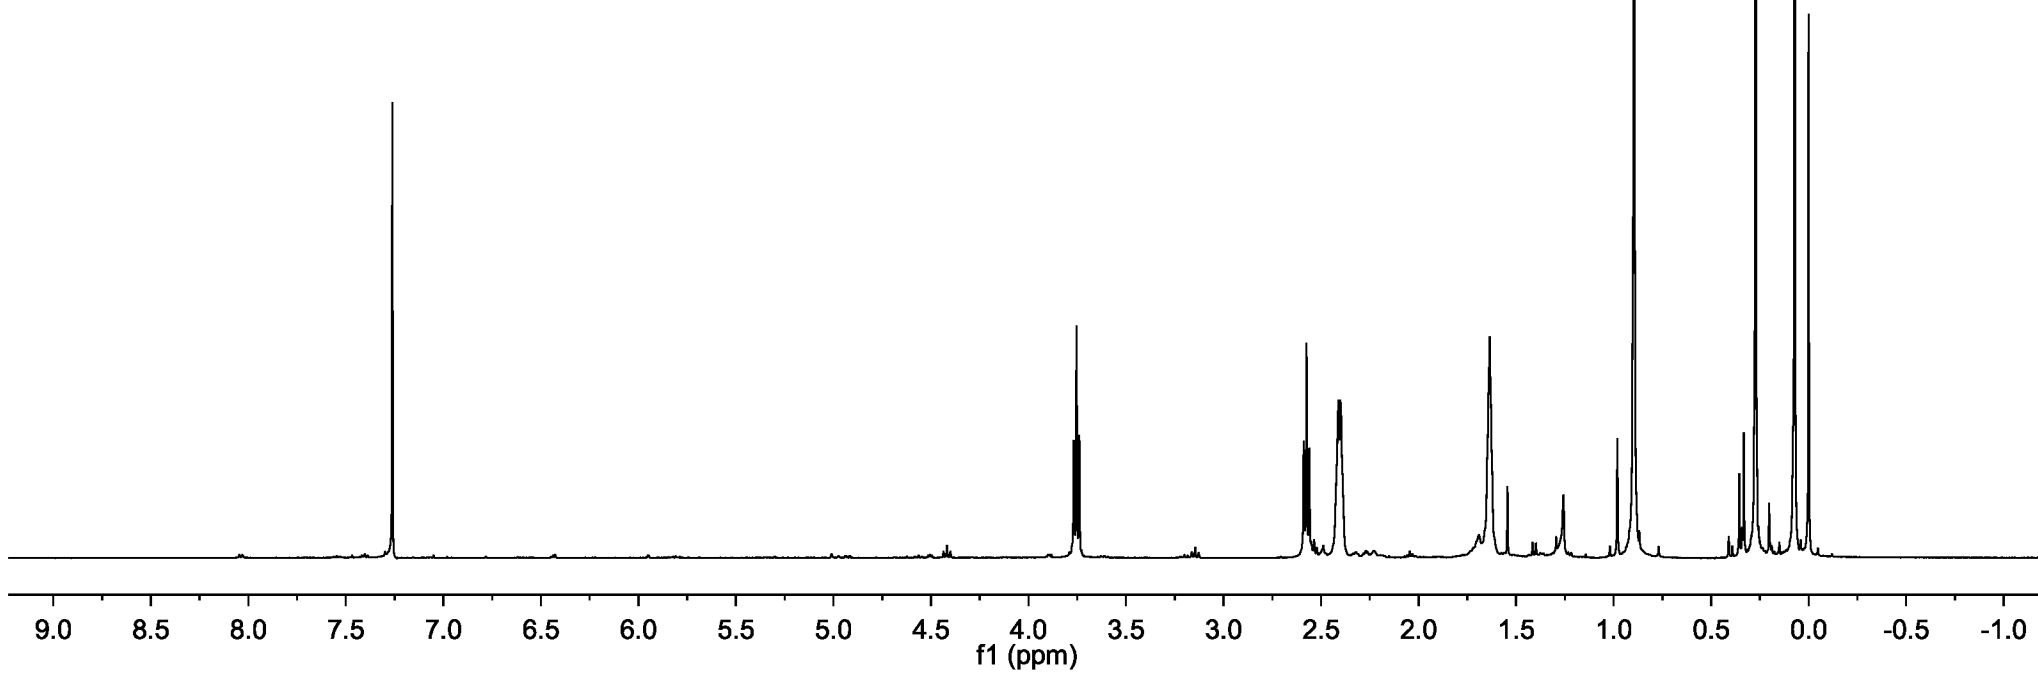

500 MHz, CDCl<sub>3</sub>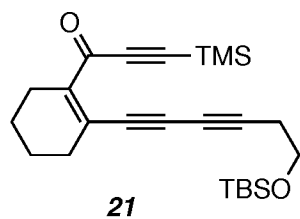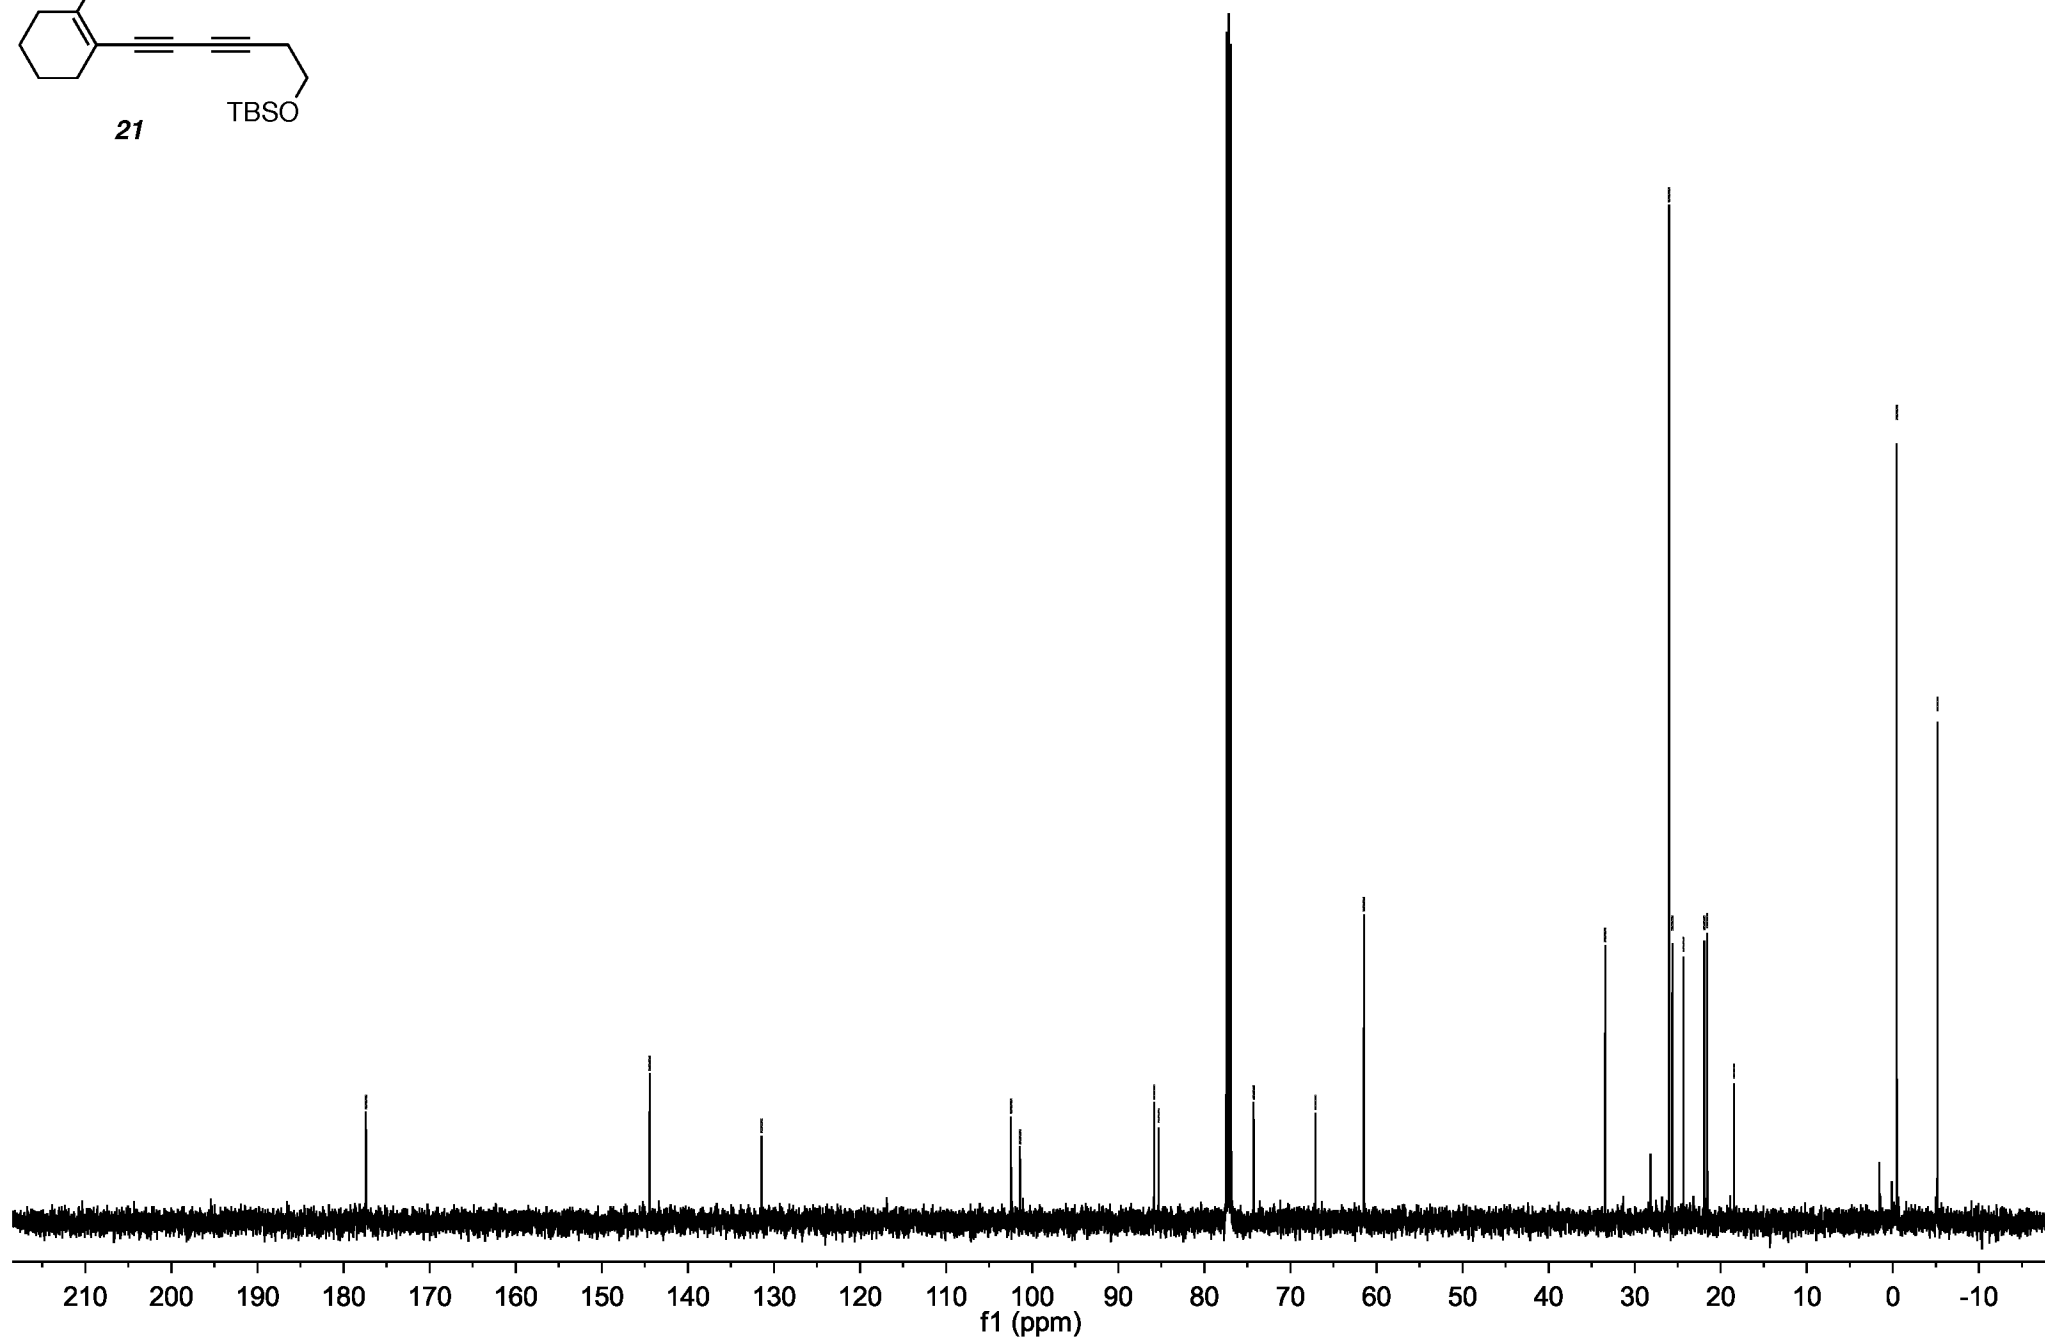

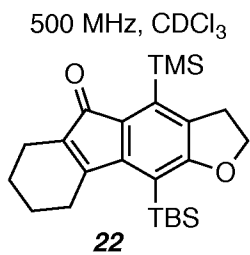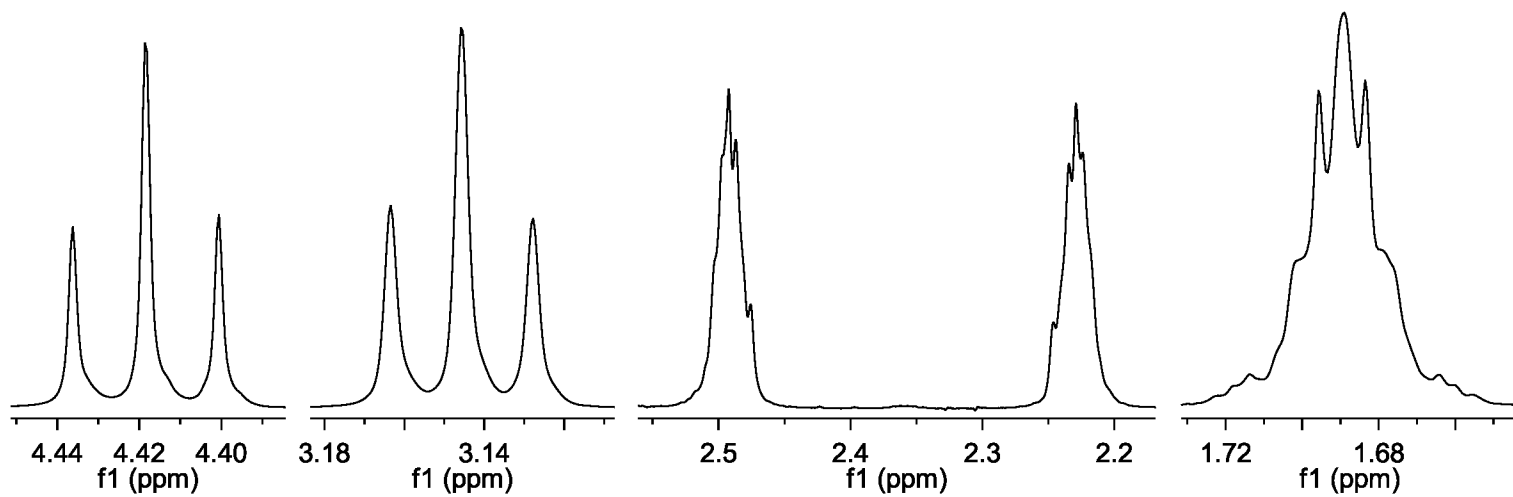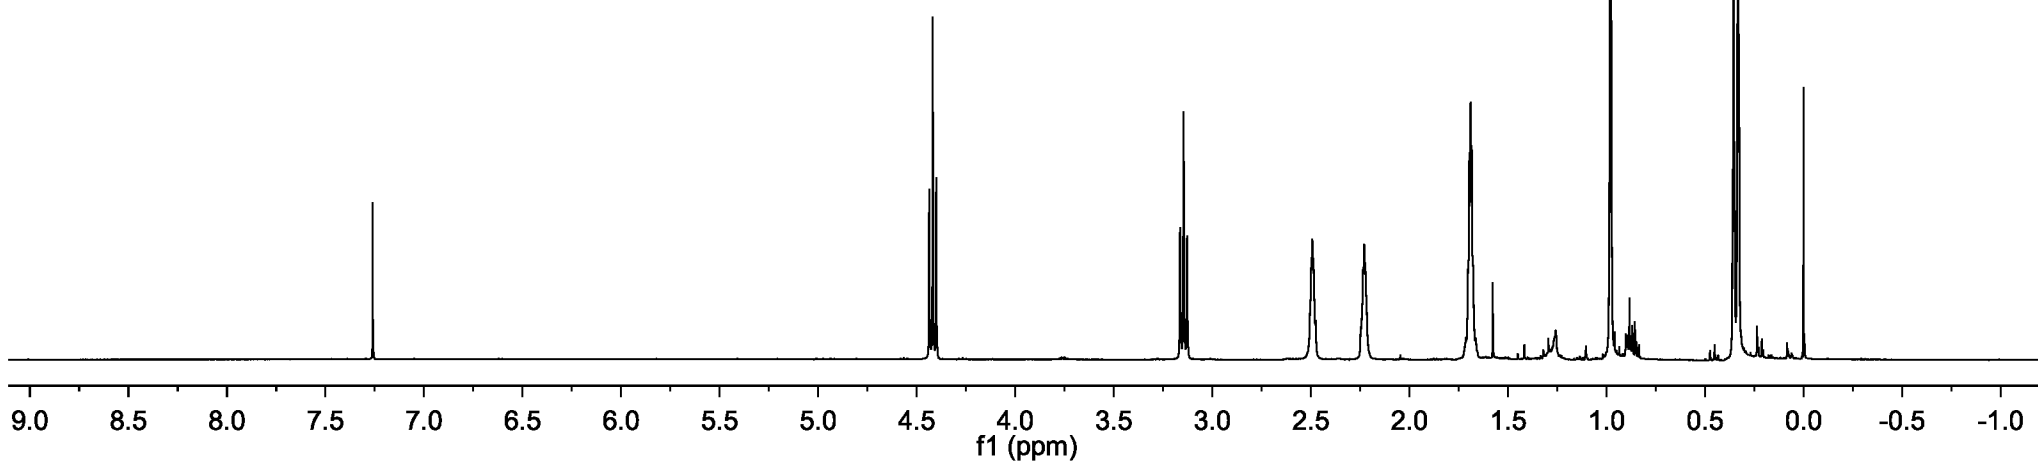

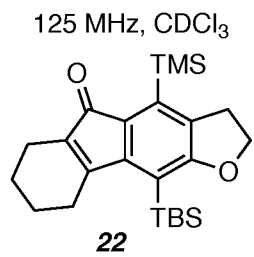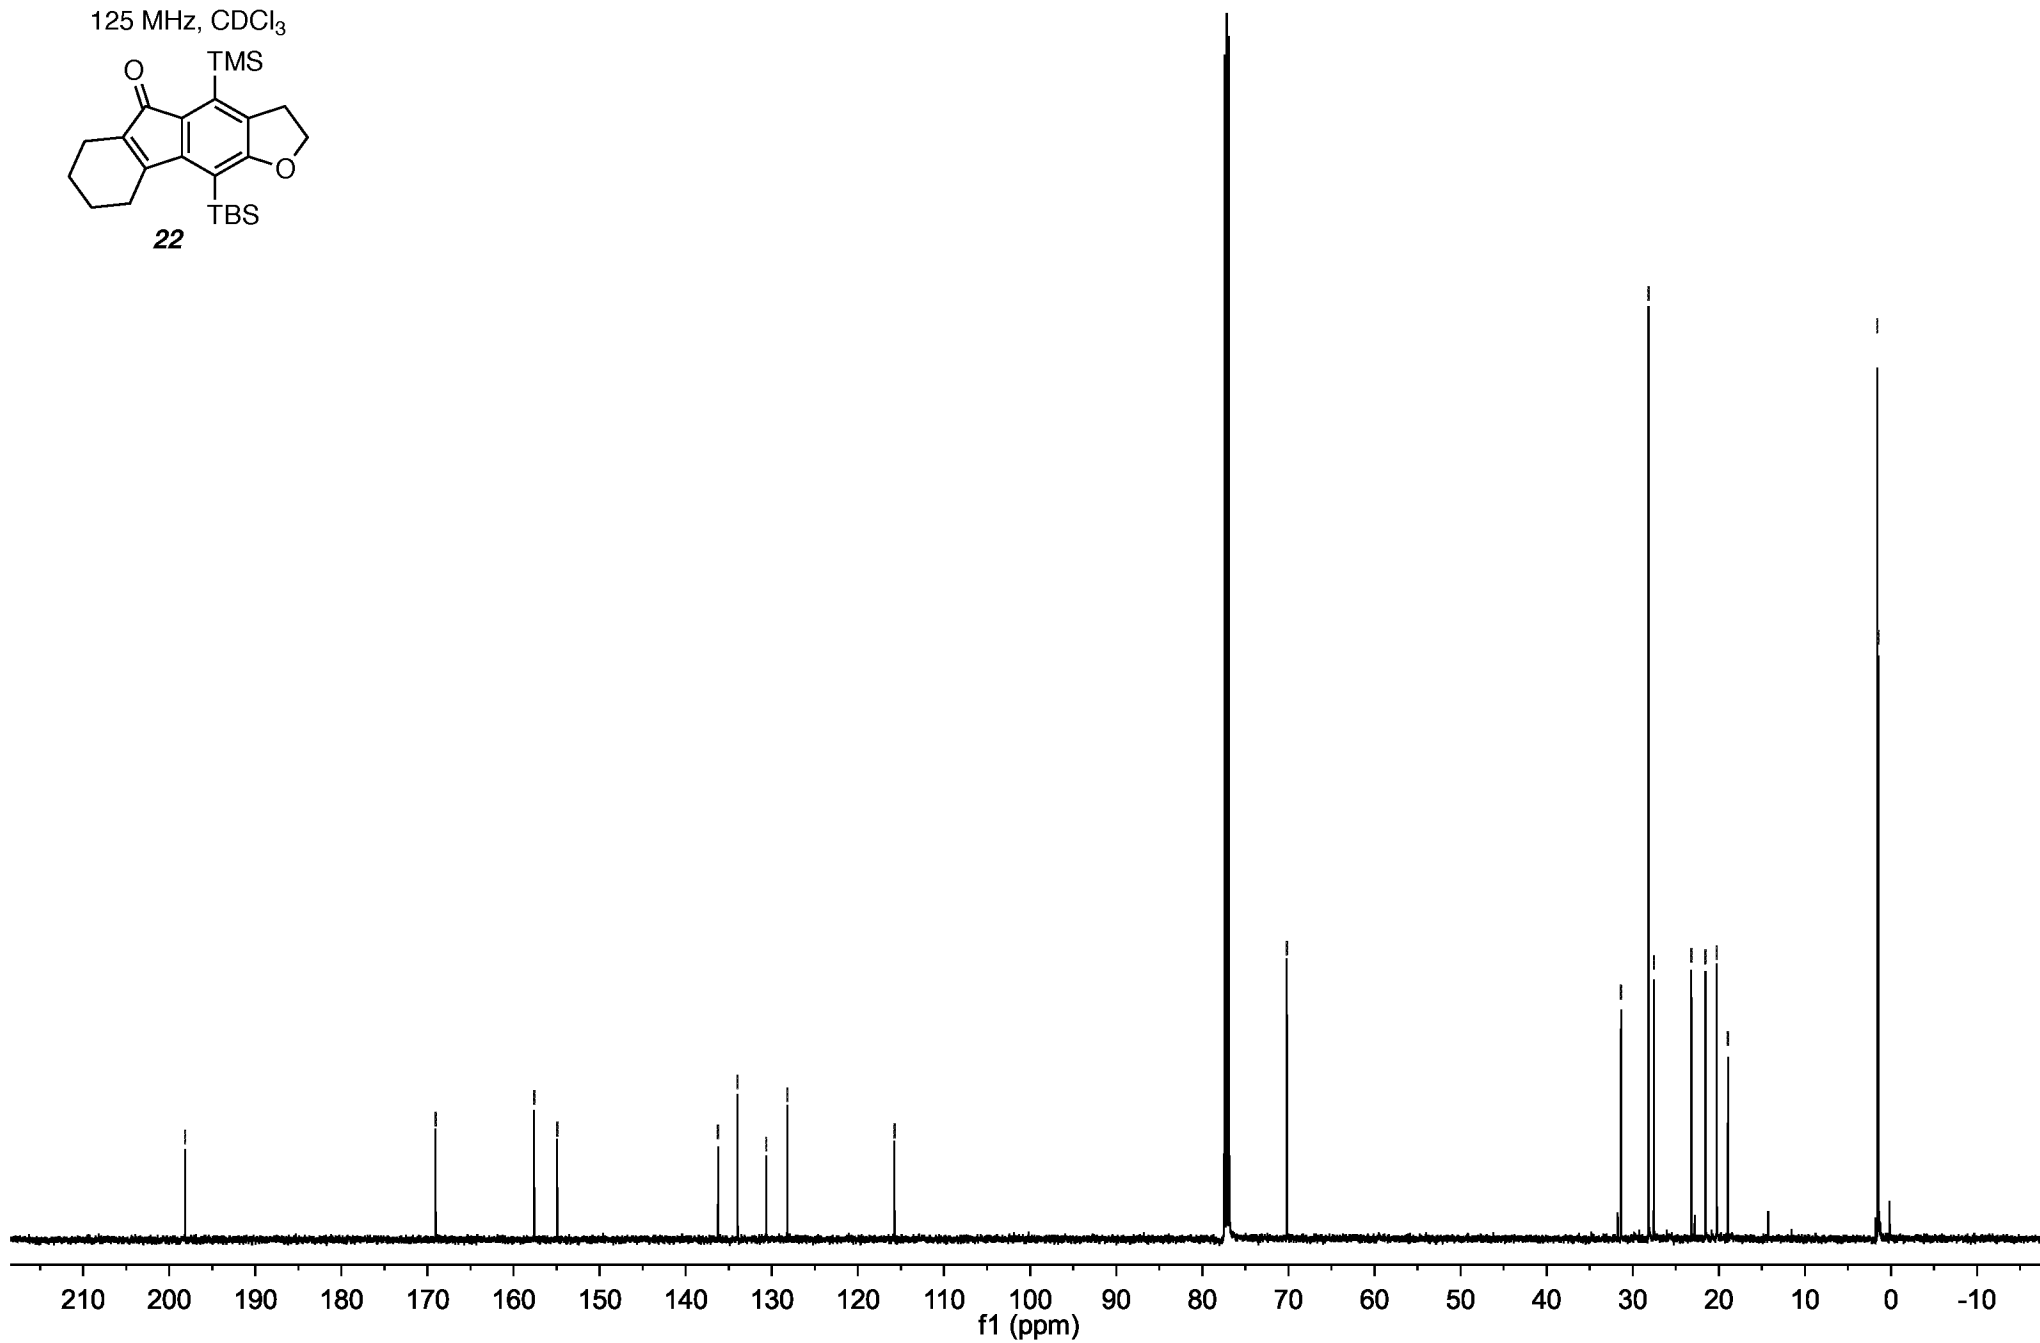



500 MHz, CDCl<sub>3</sub>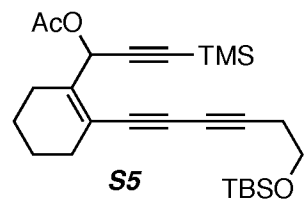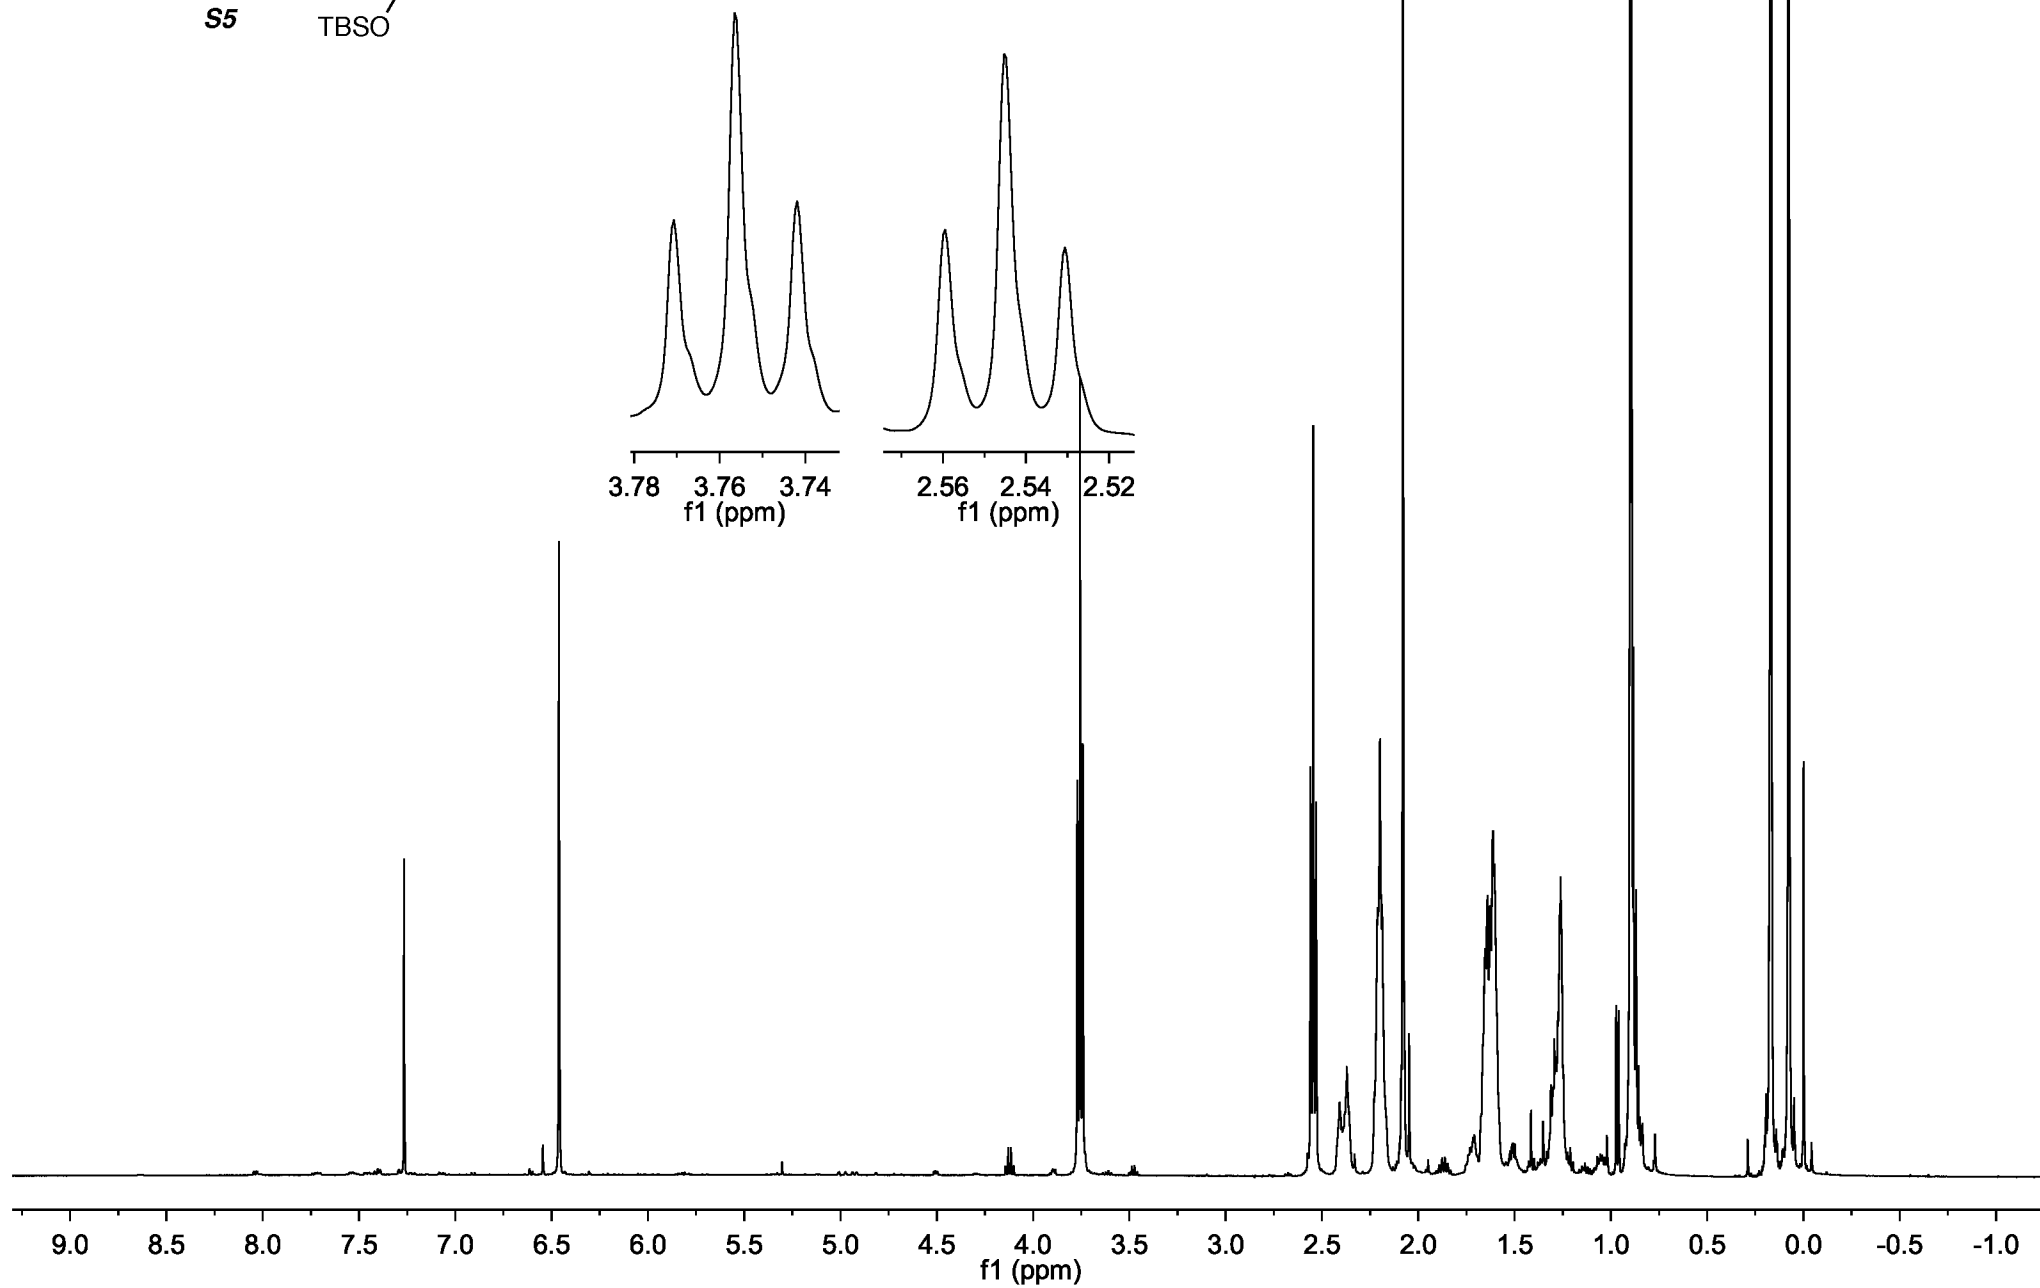

125 MHz, CDCl<sub>3</sub>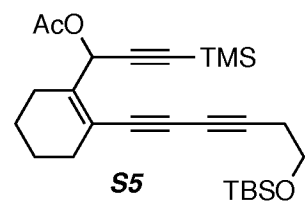**S5**

TBSO

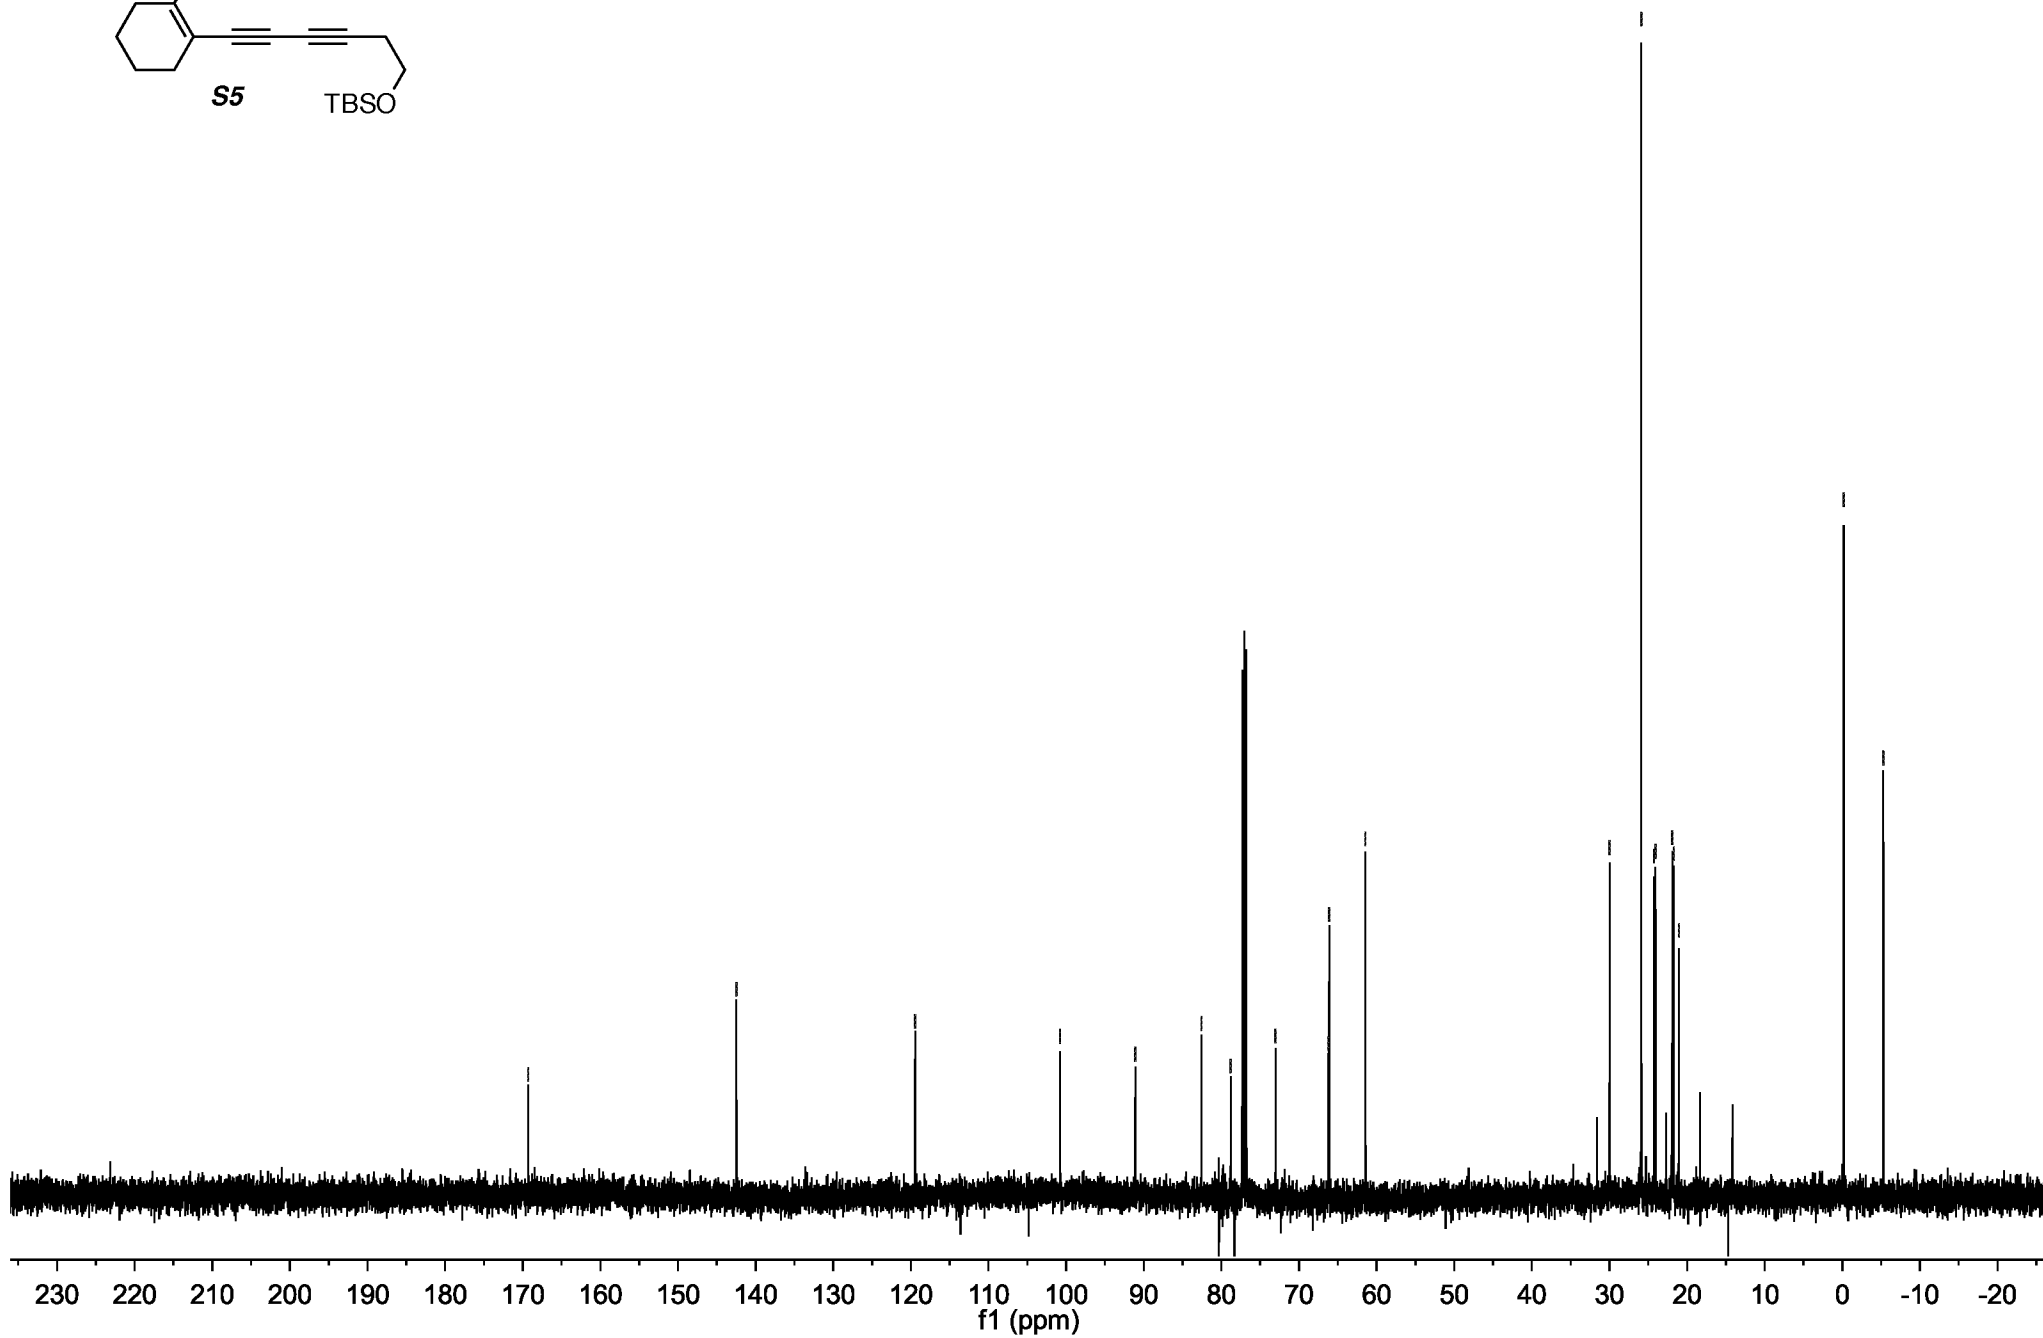

500 MHz, CDCl<sub>3</sub>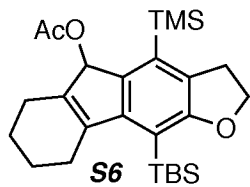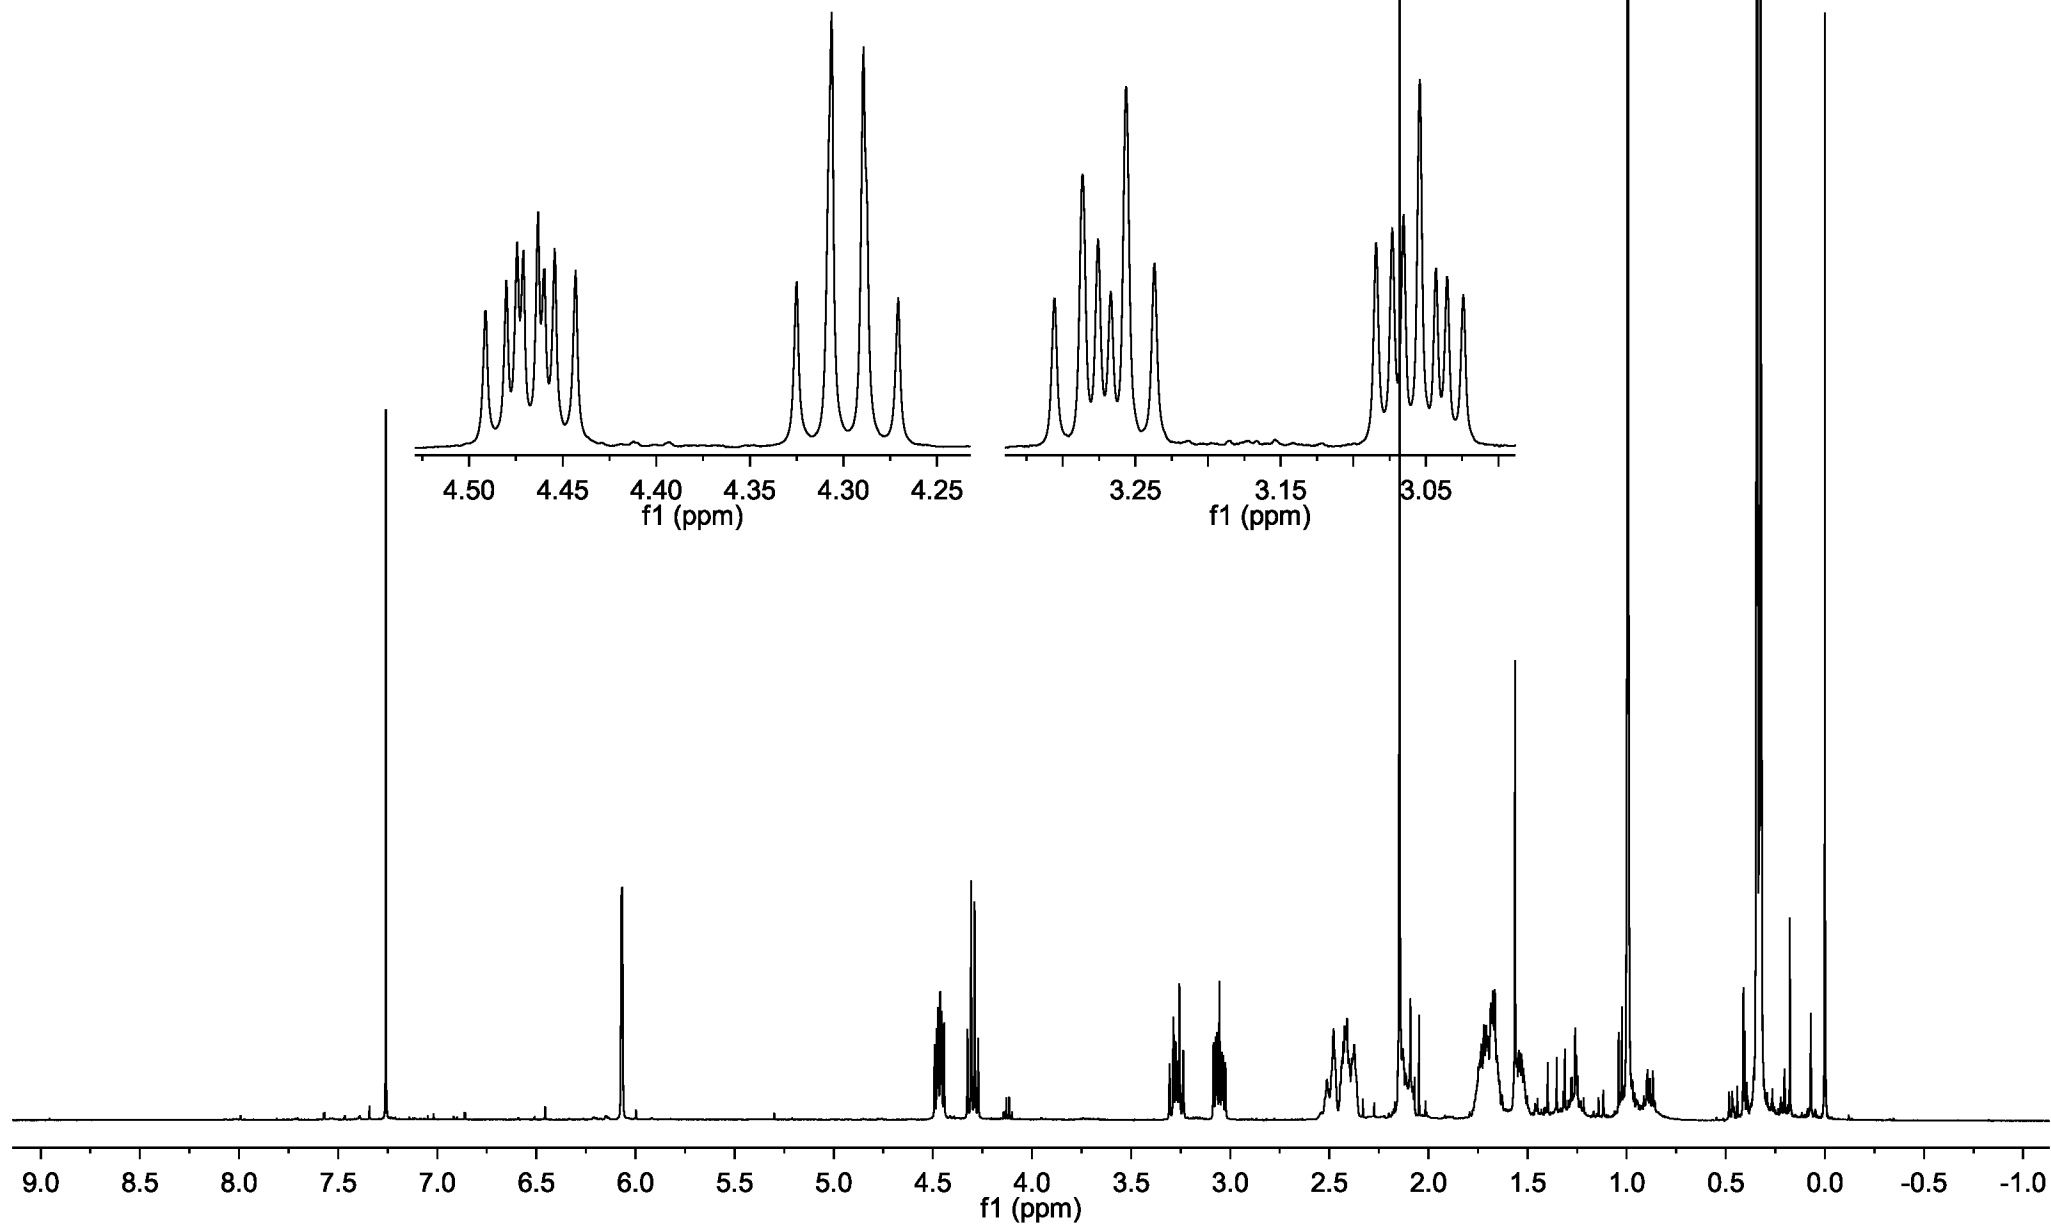

125 MHz, CDCl<sub>3</sub>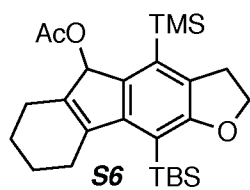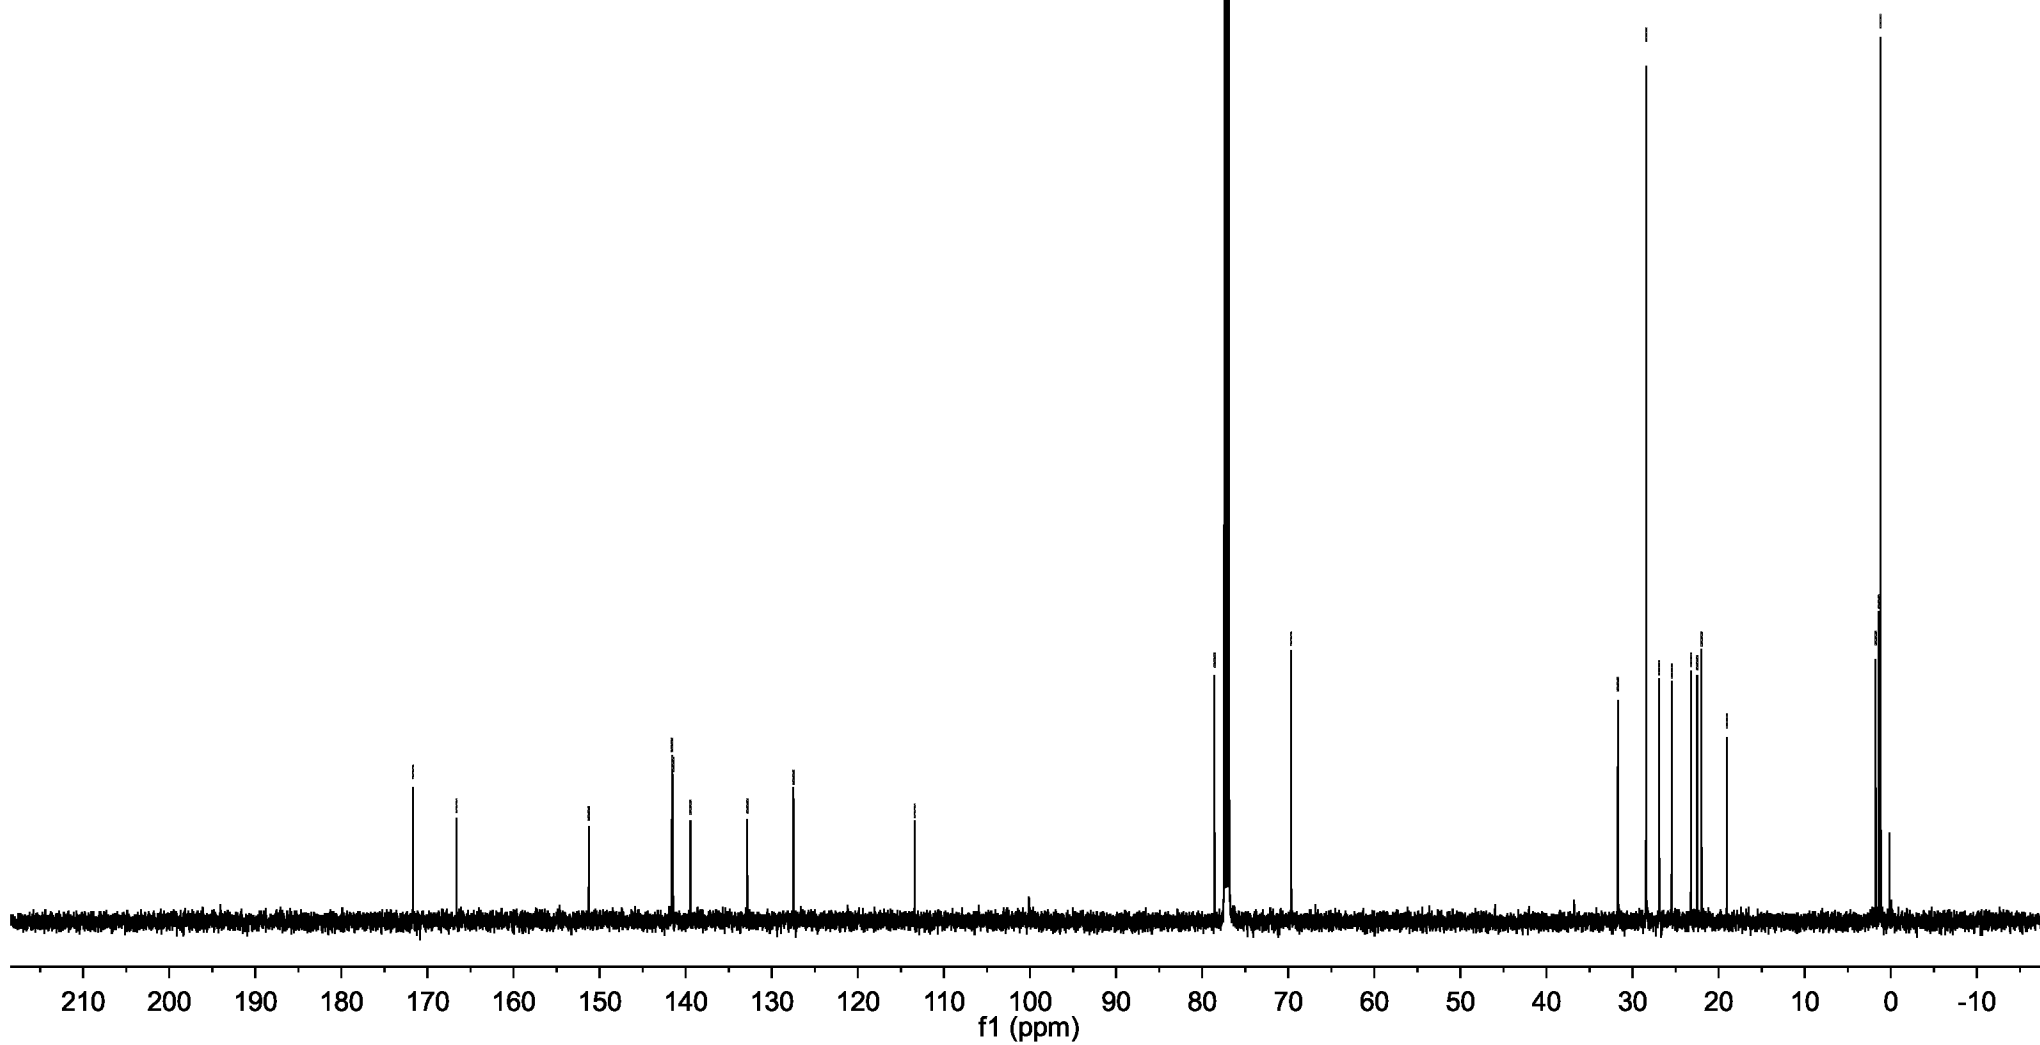

500 MHz, CDCl<sub>3</sub>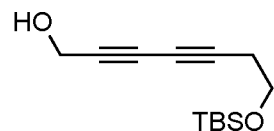**S7**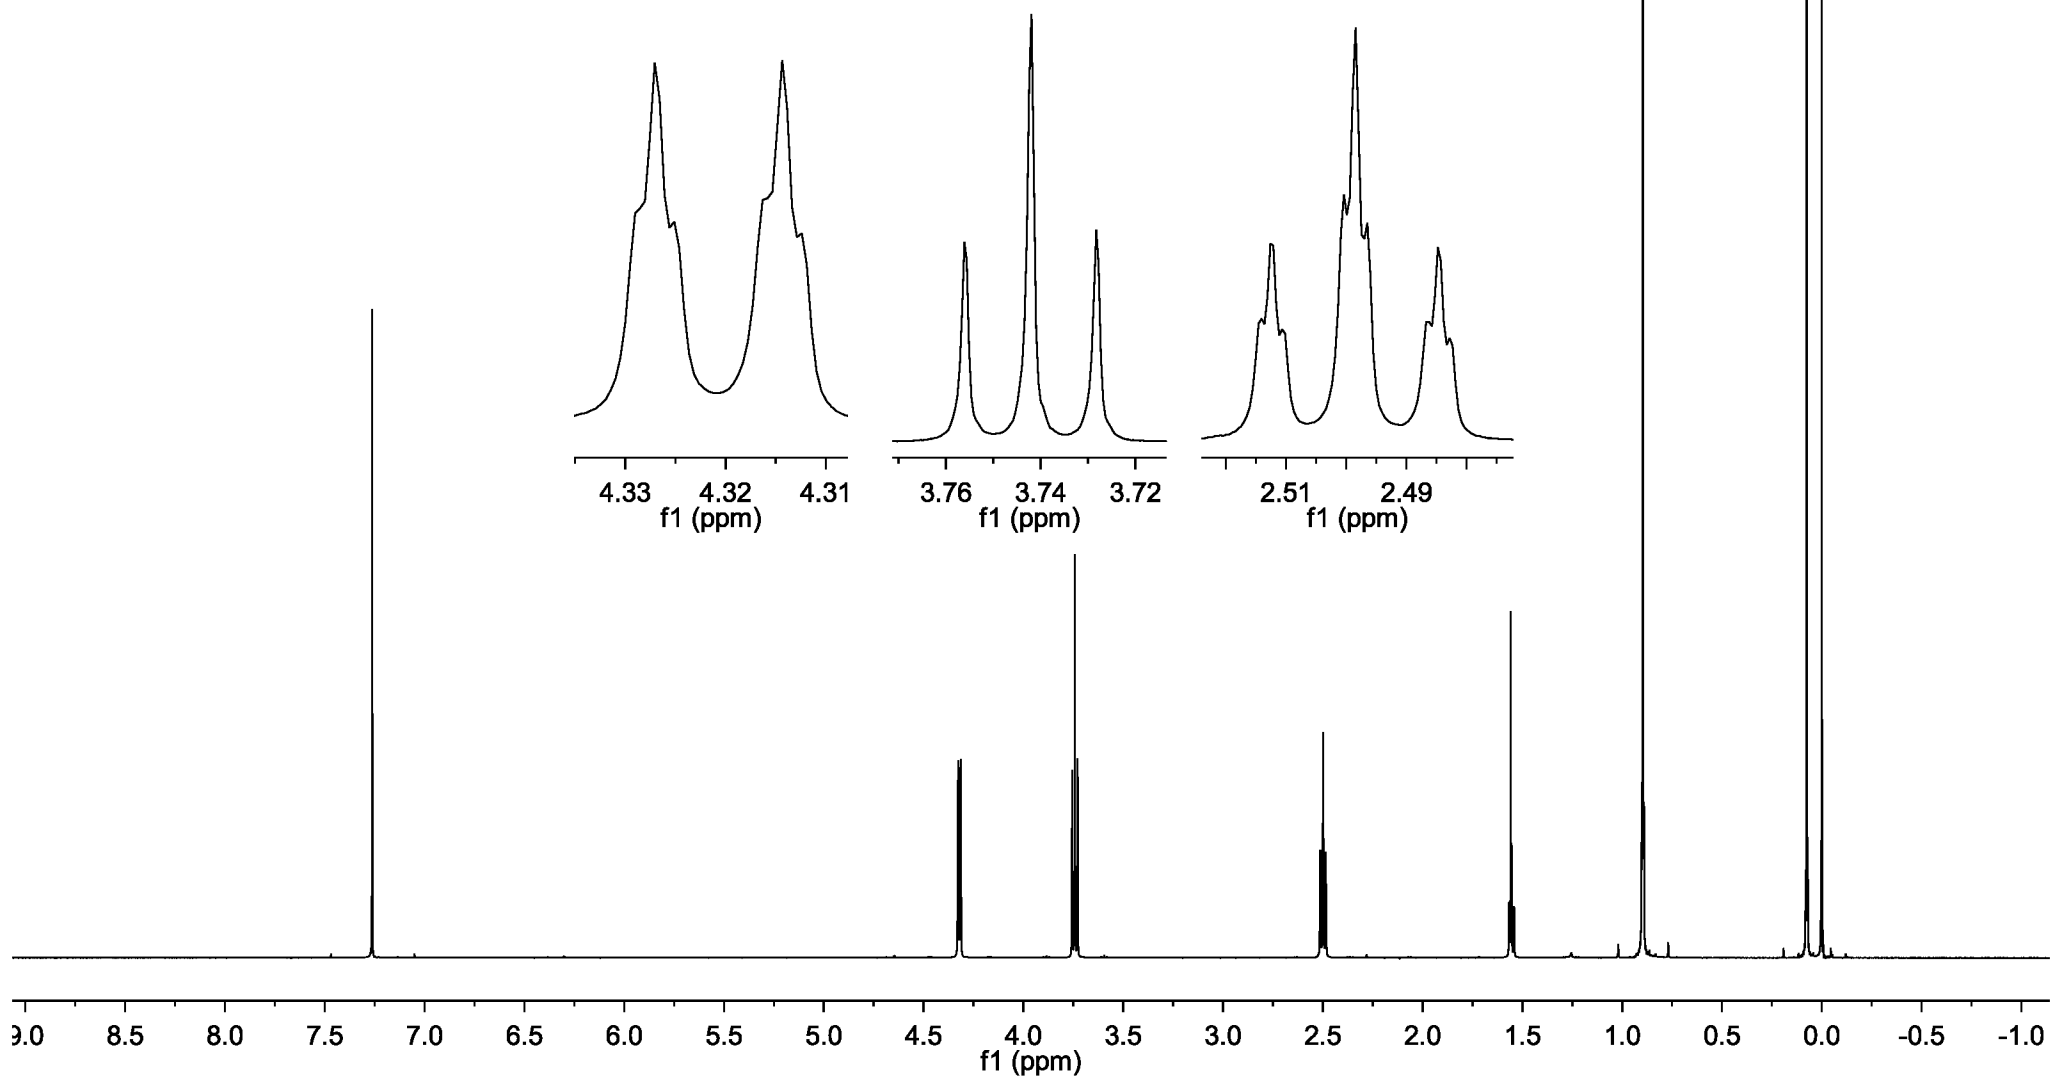

125 MHz, CDCl<sub>3</sub>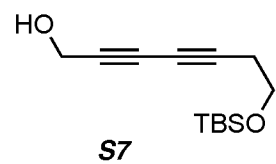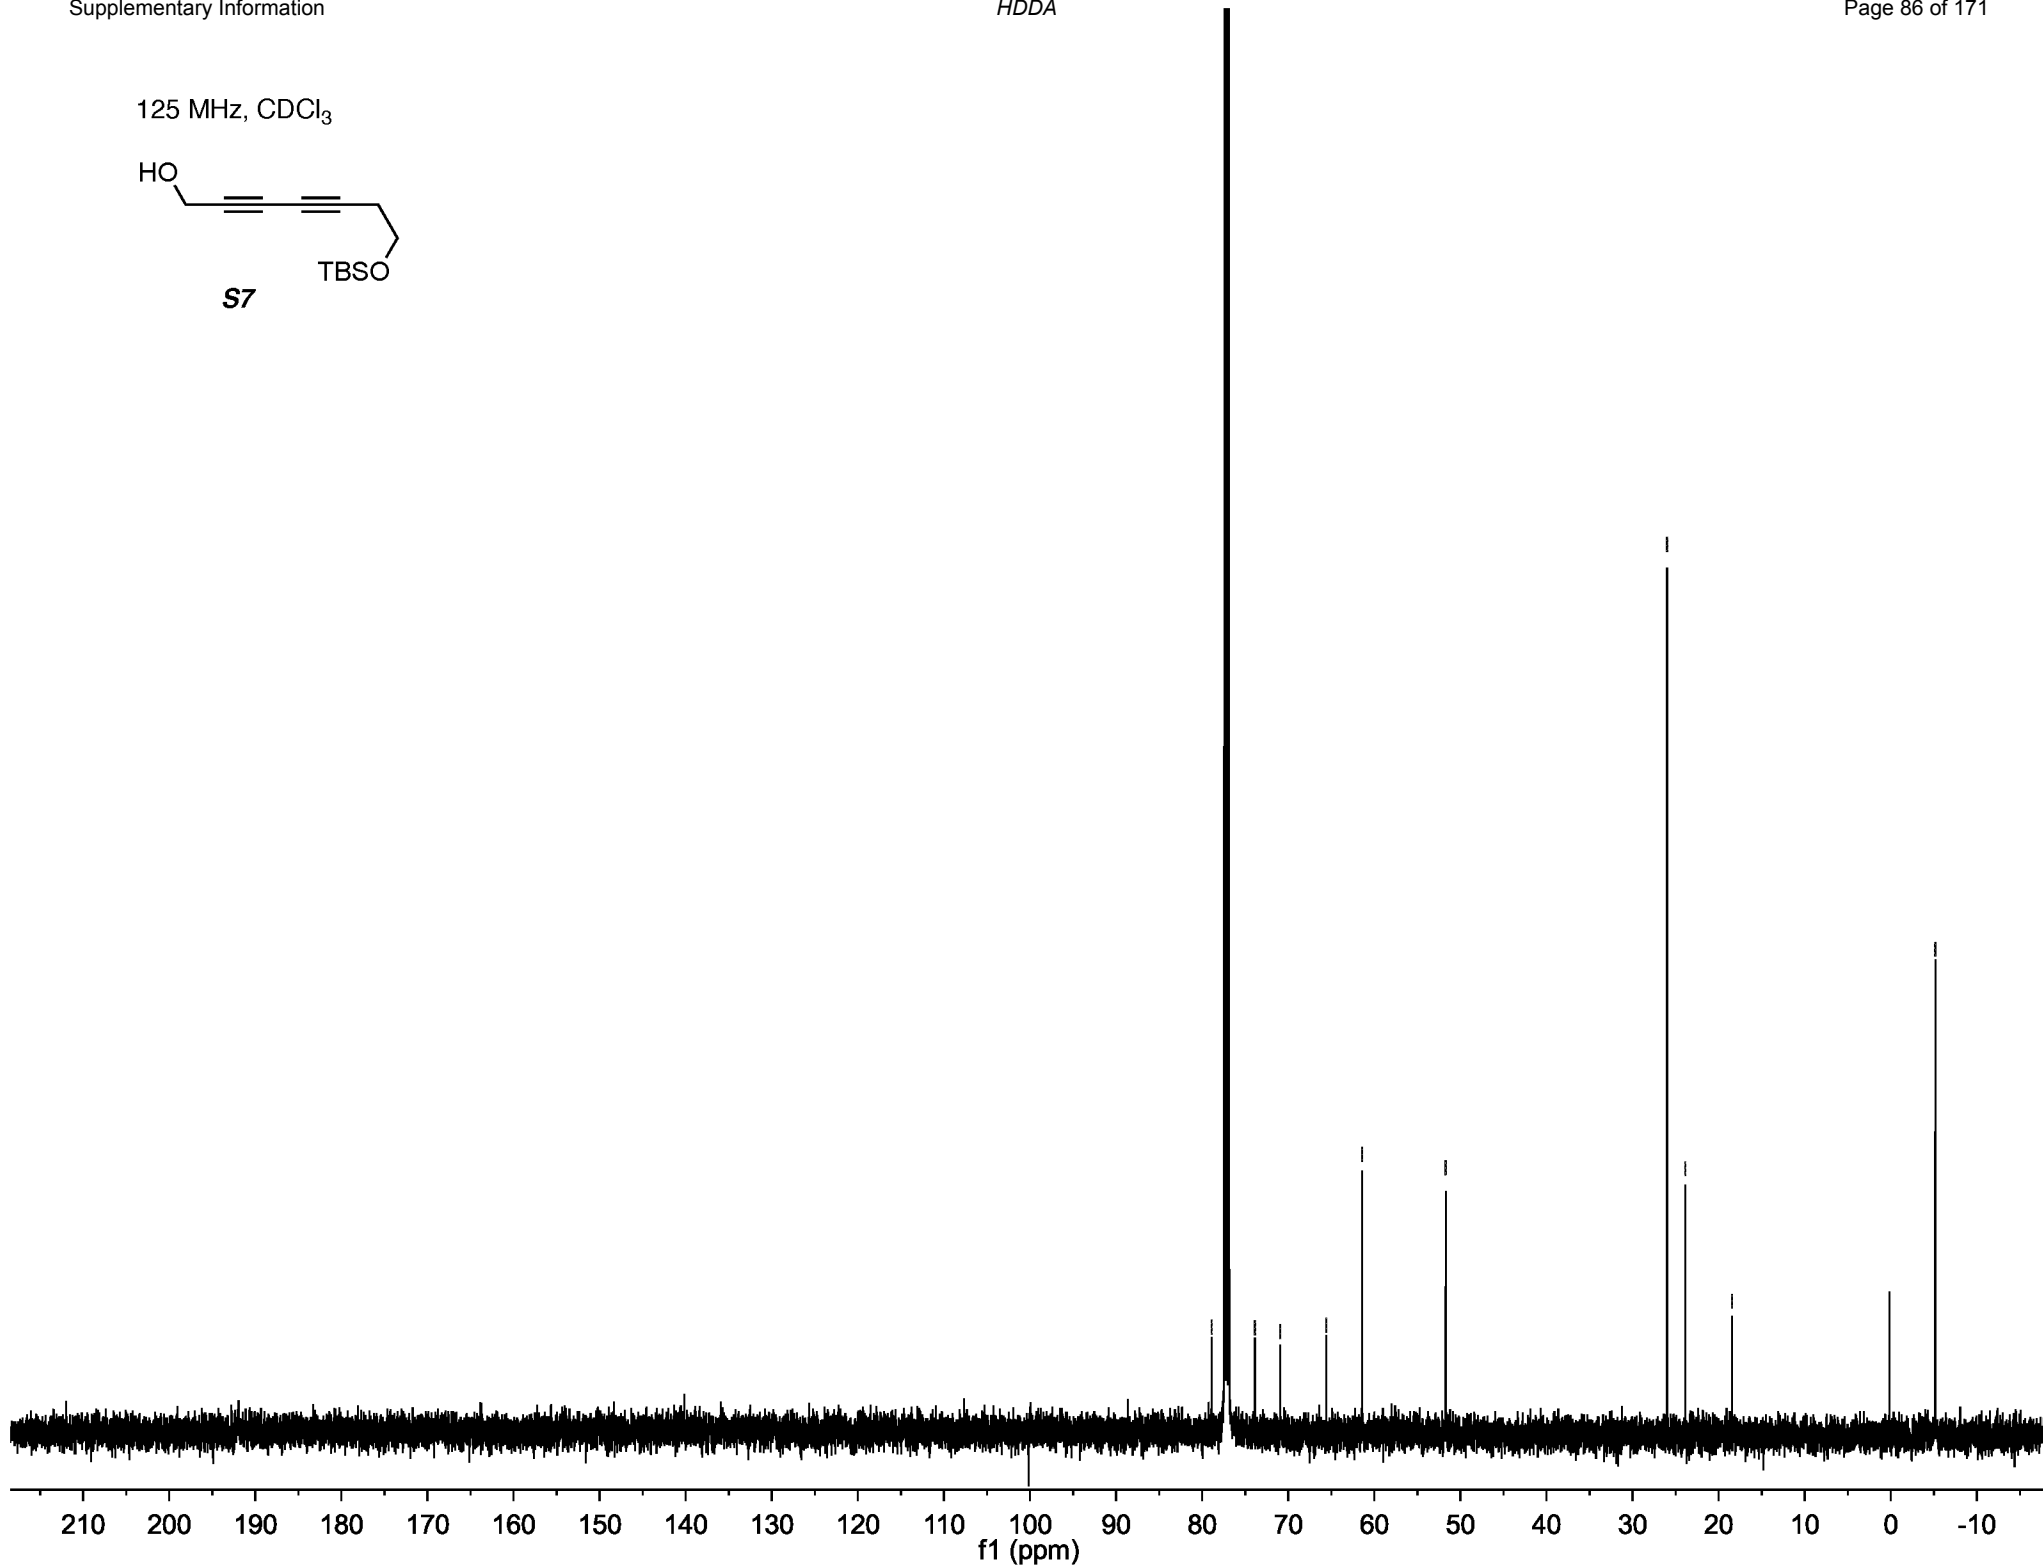



125 MHz, CDCl<sub>3</sub>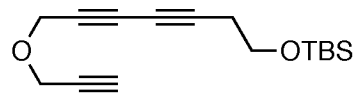**S8**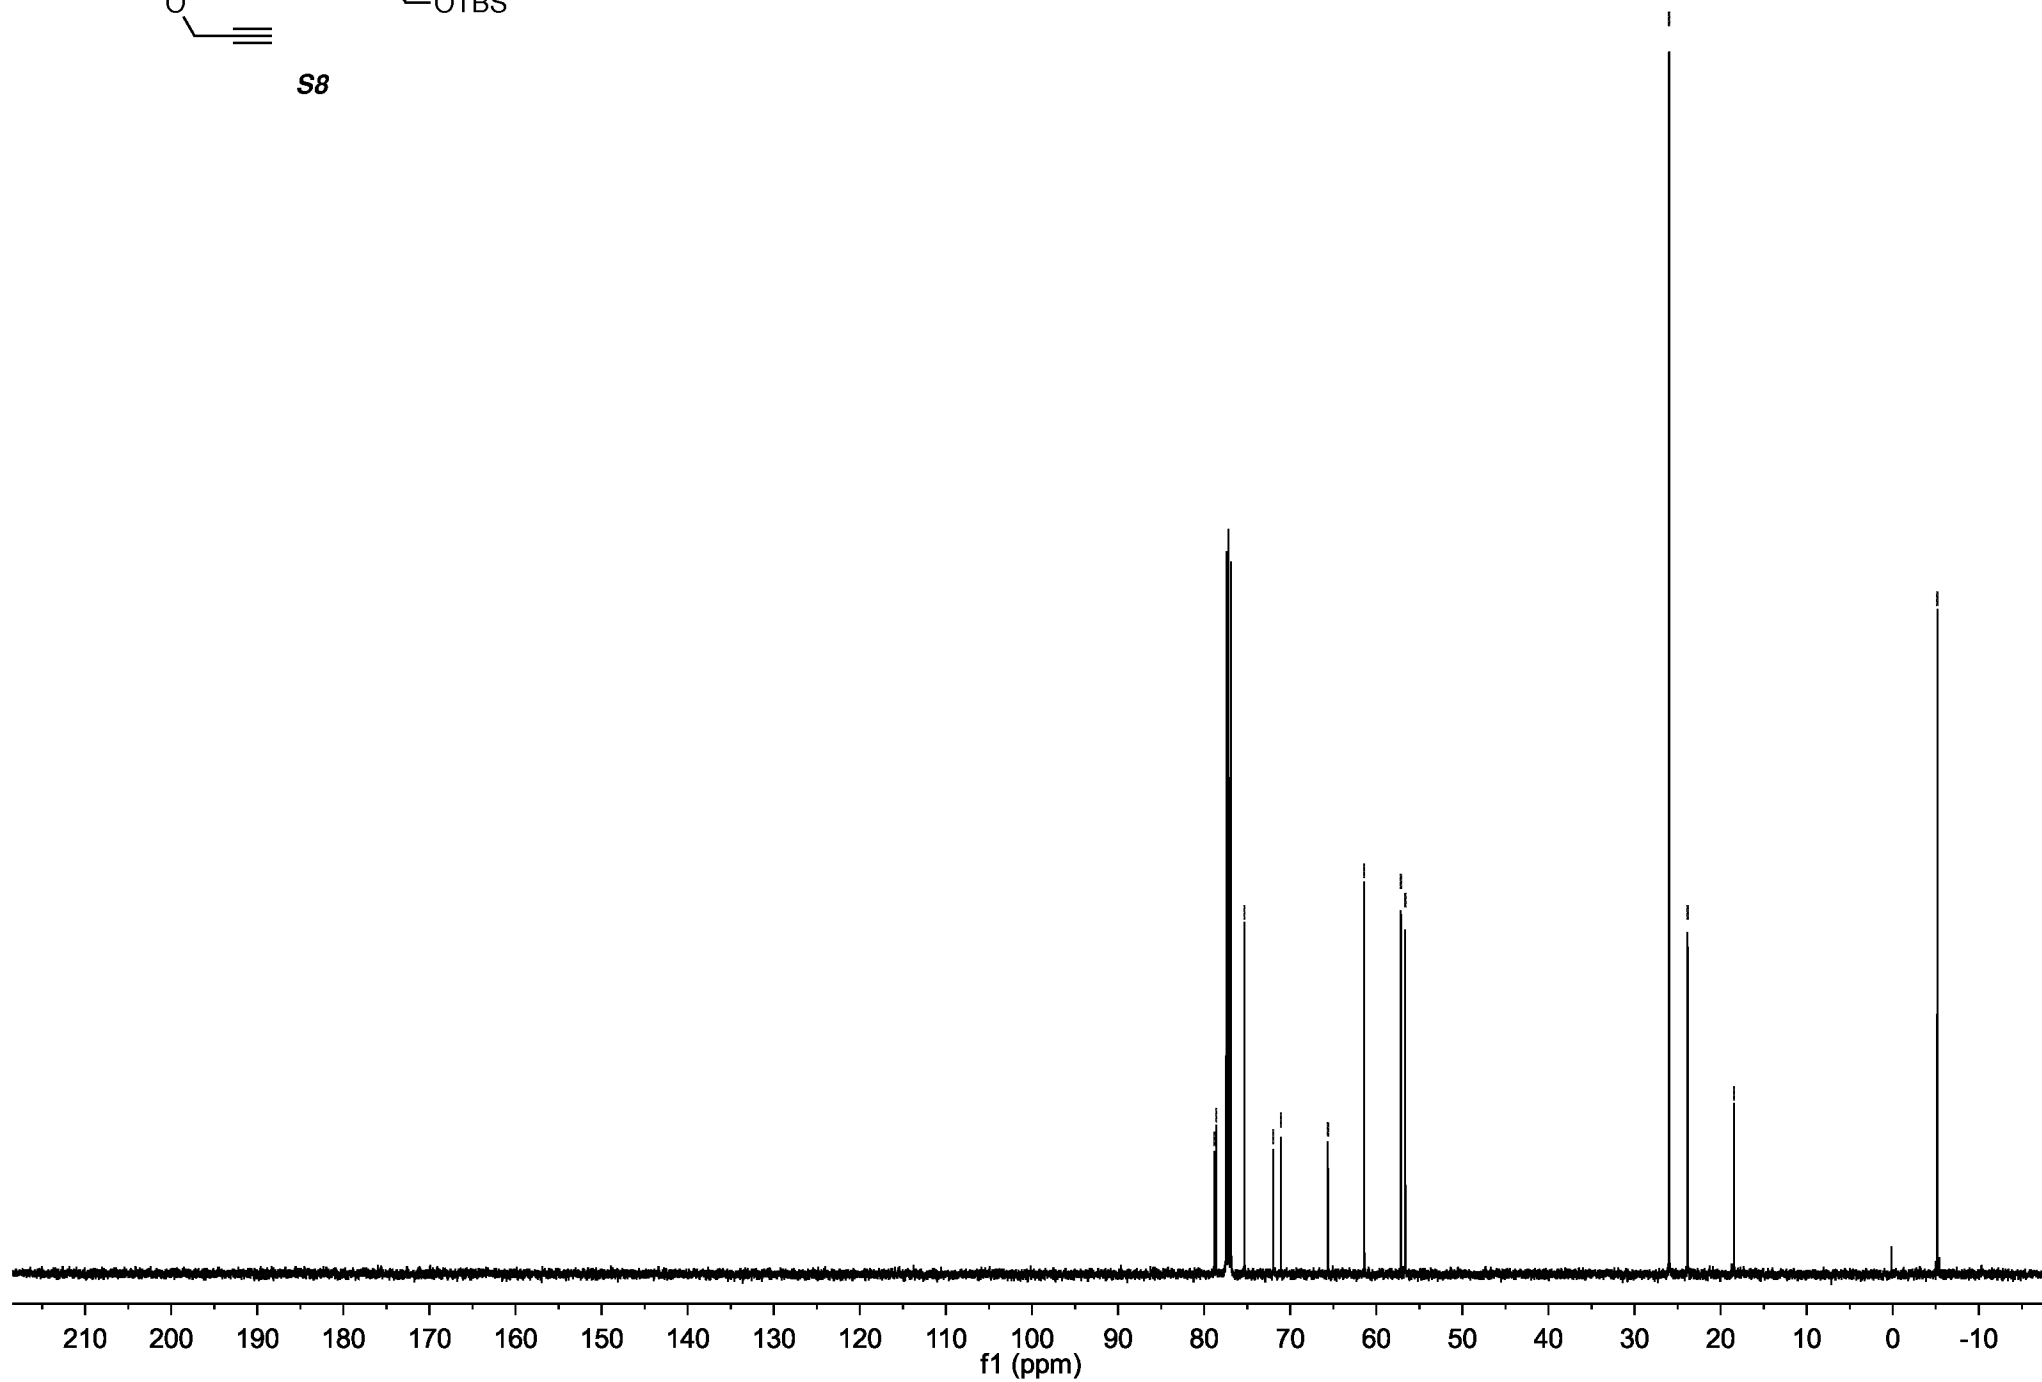



500 MHz, CDCl<sub>3</sub>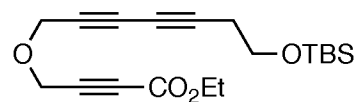**S9**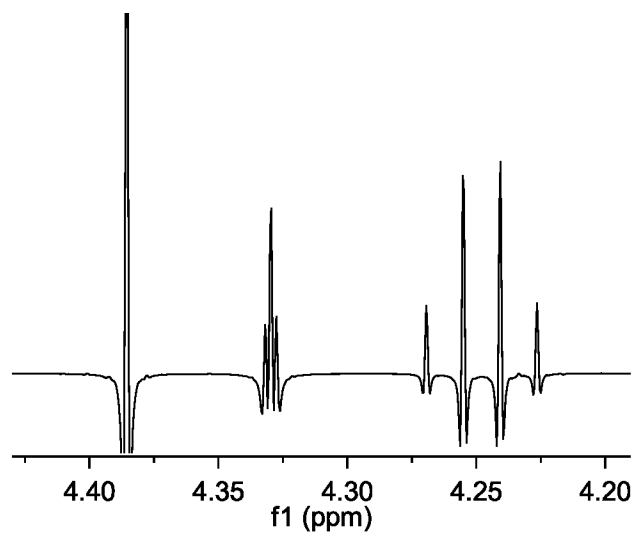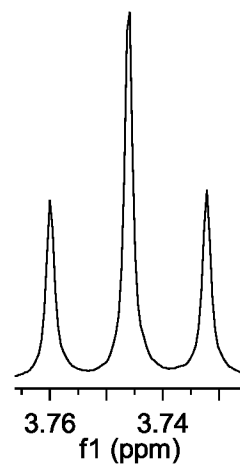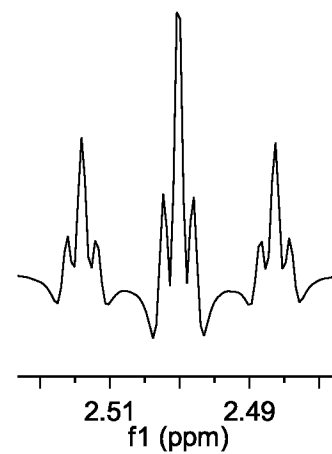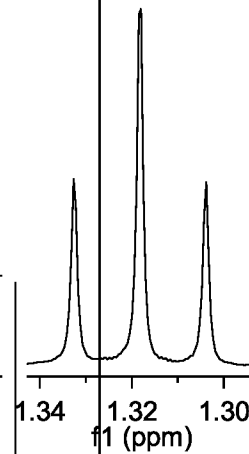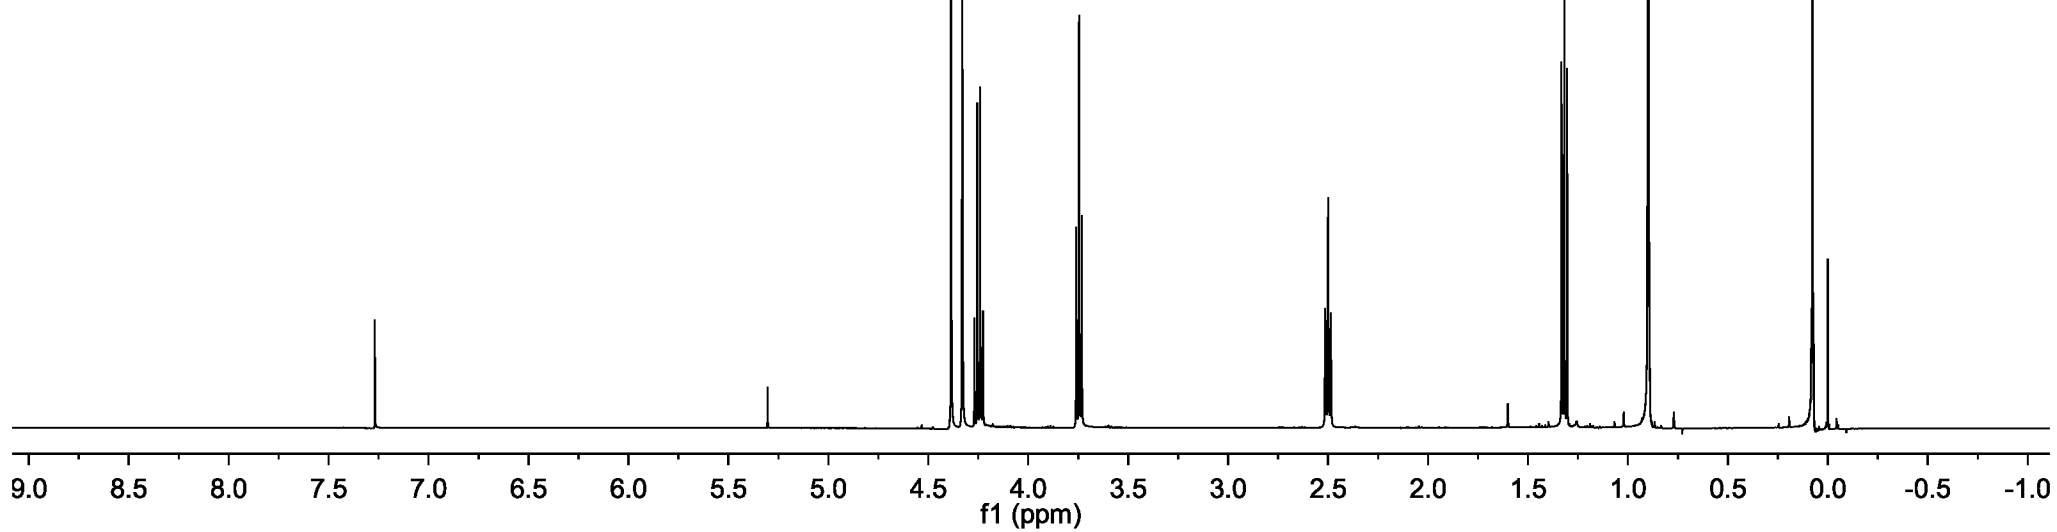

125 MHz, CDCl<sub>3</sub>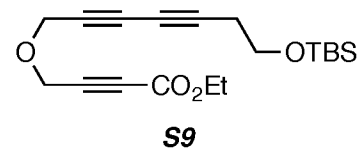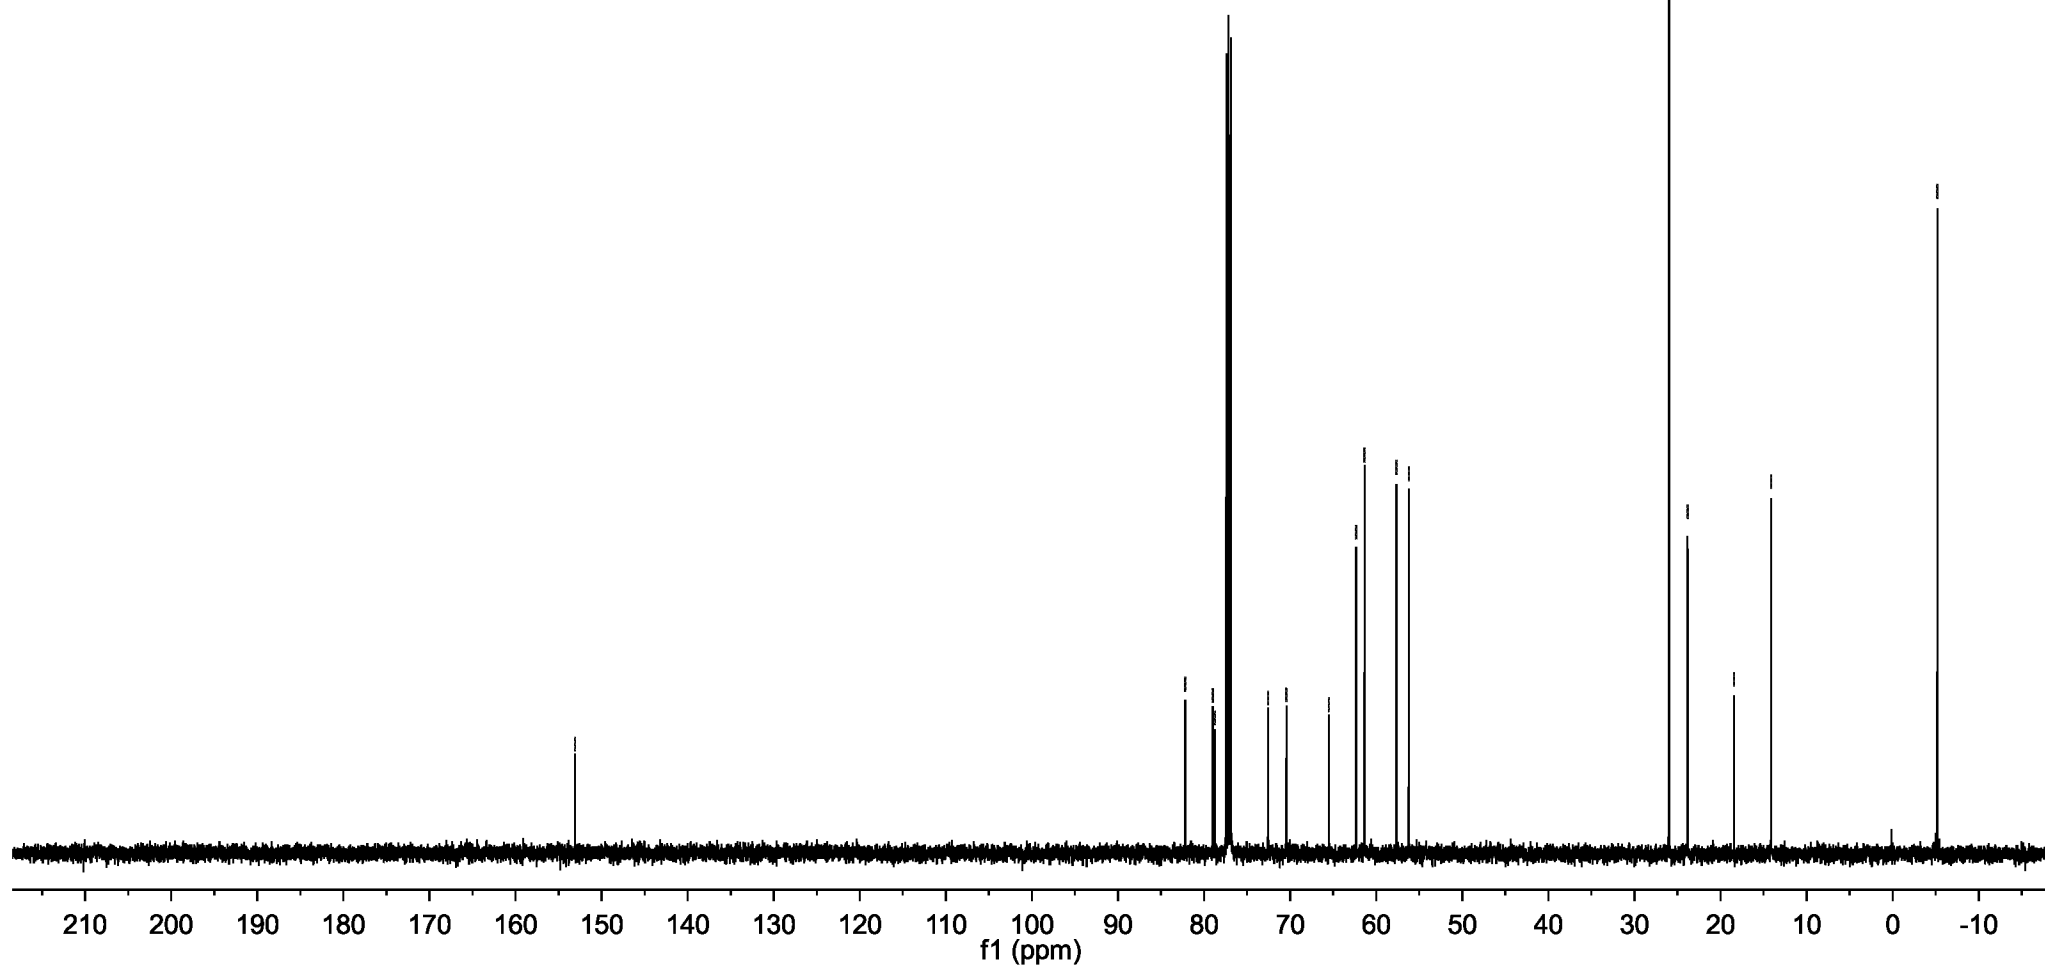

500 MHz, CDCl<sub>3</sub>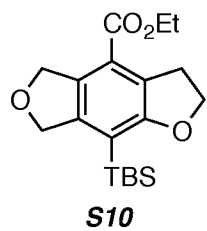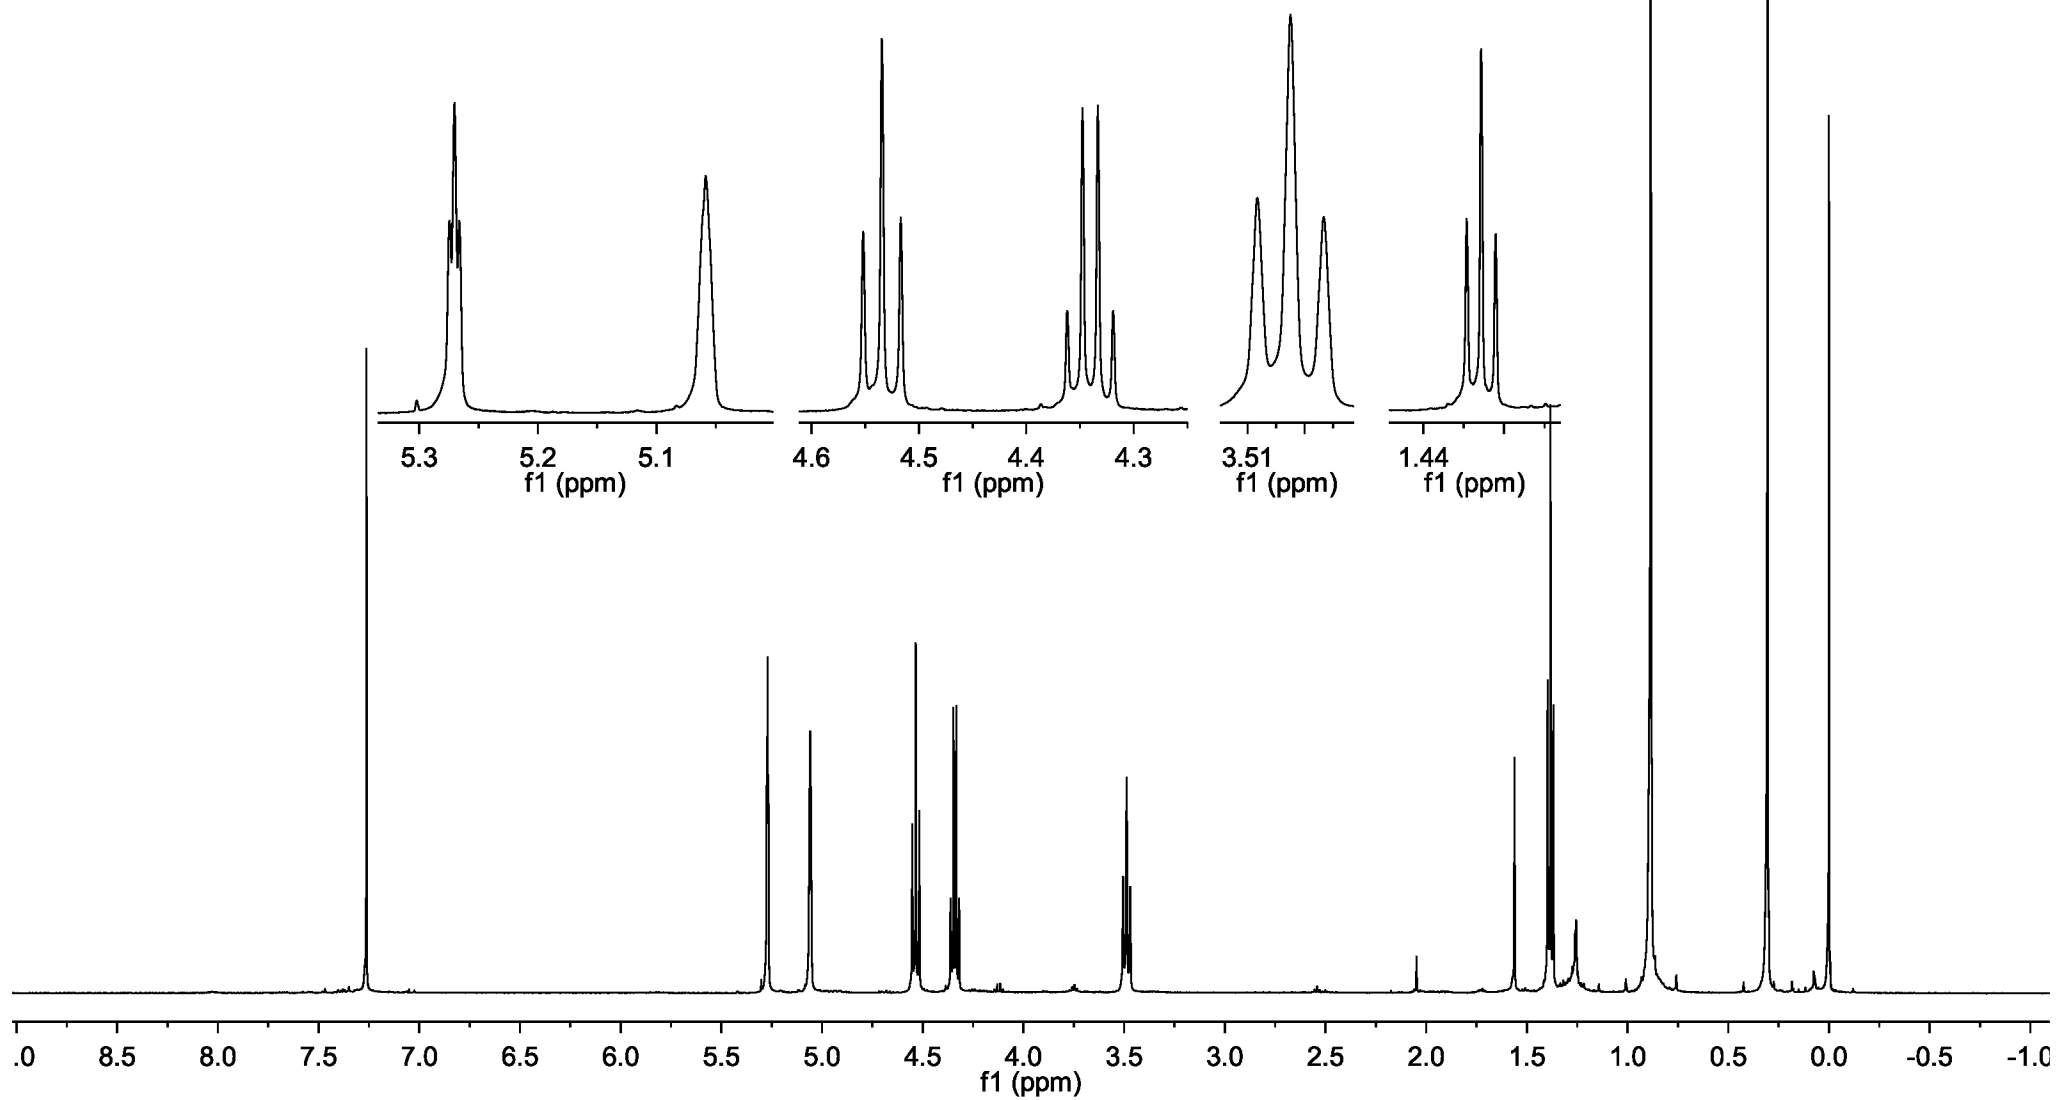

125 MHz, CDCl<sub>3</sub>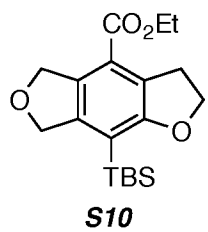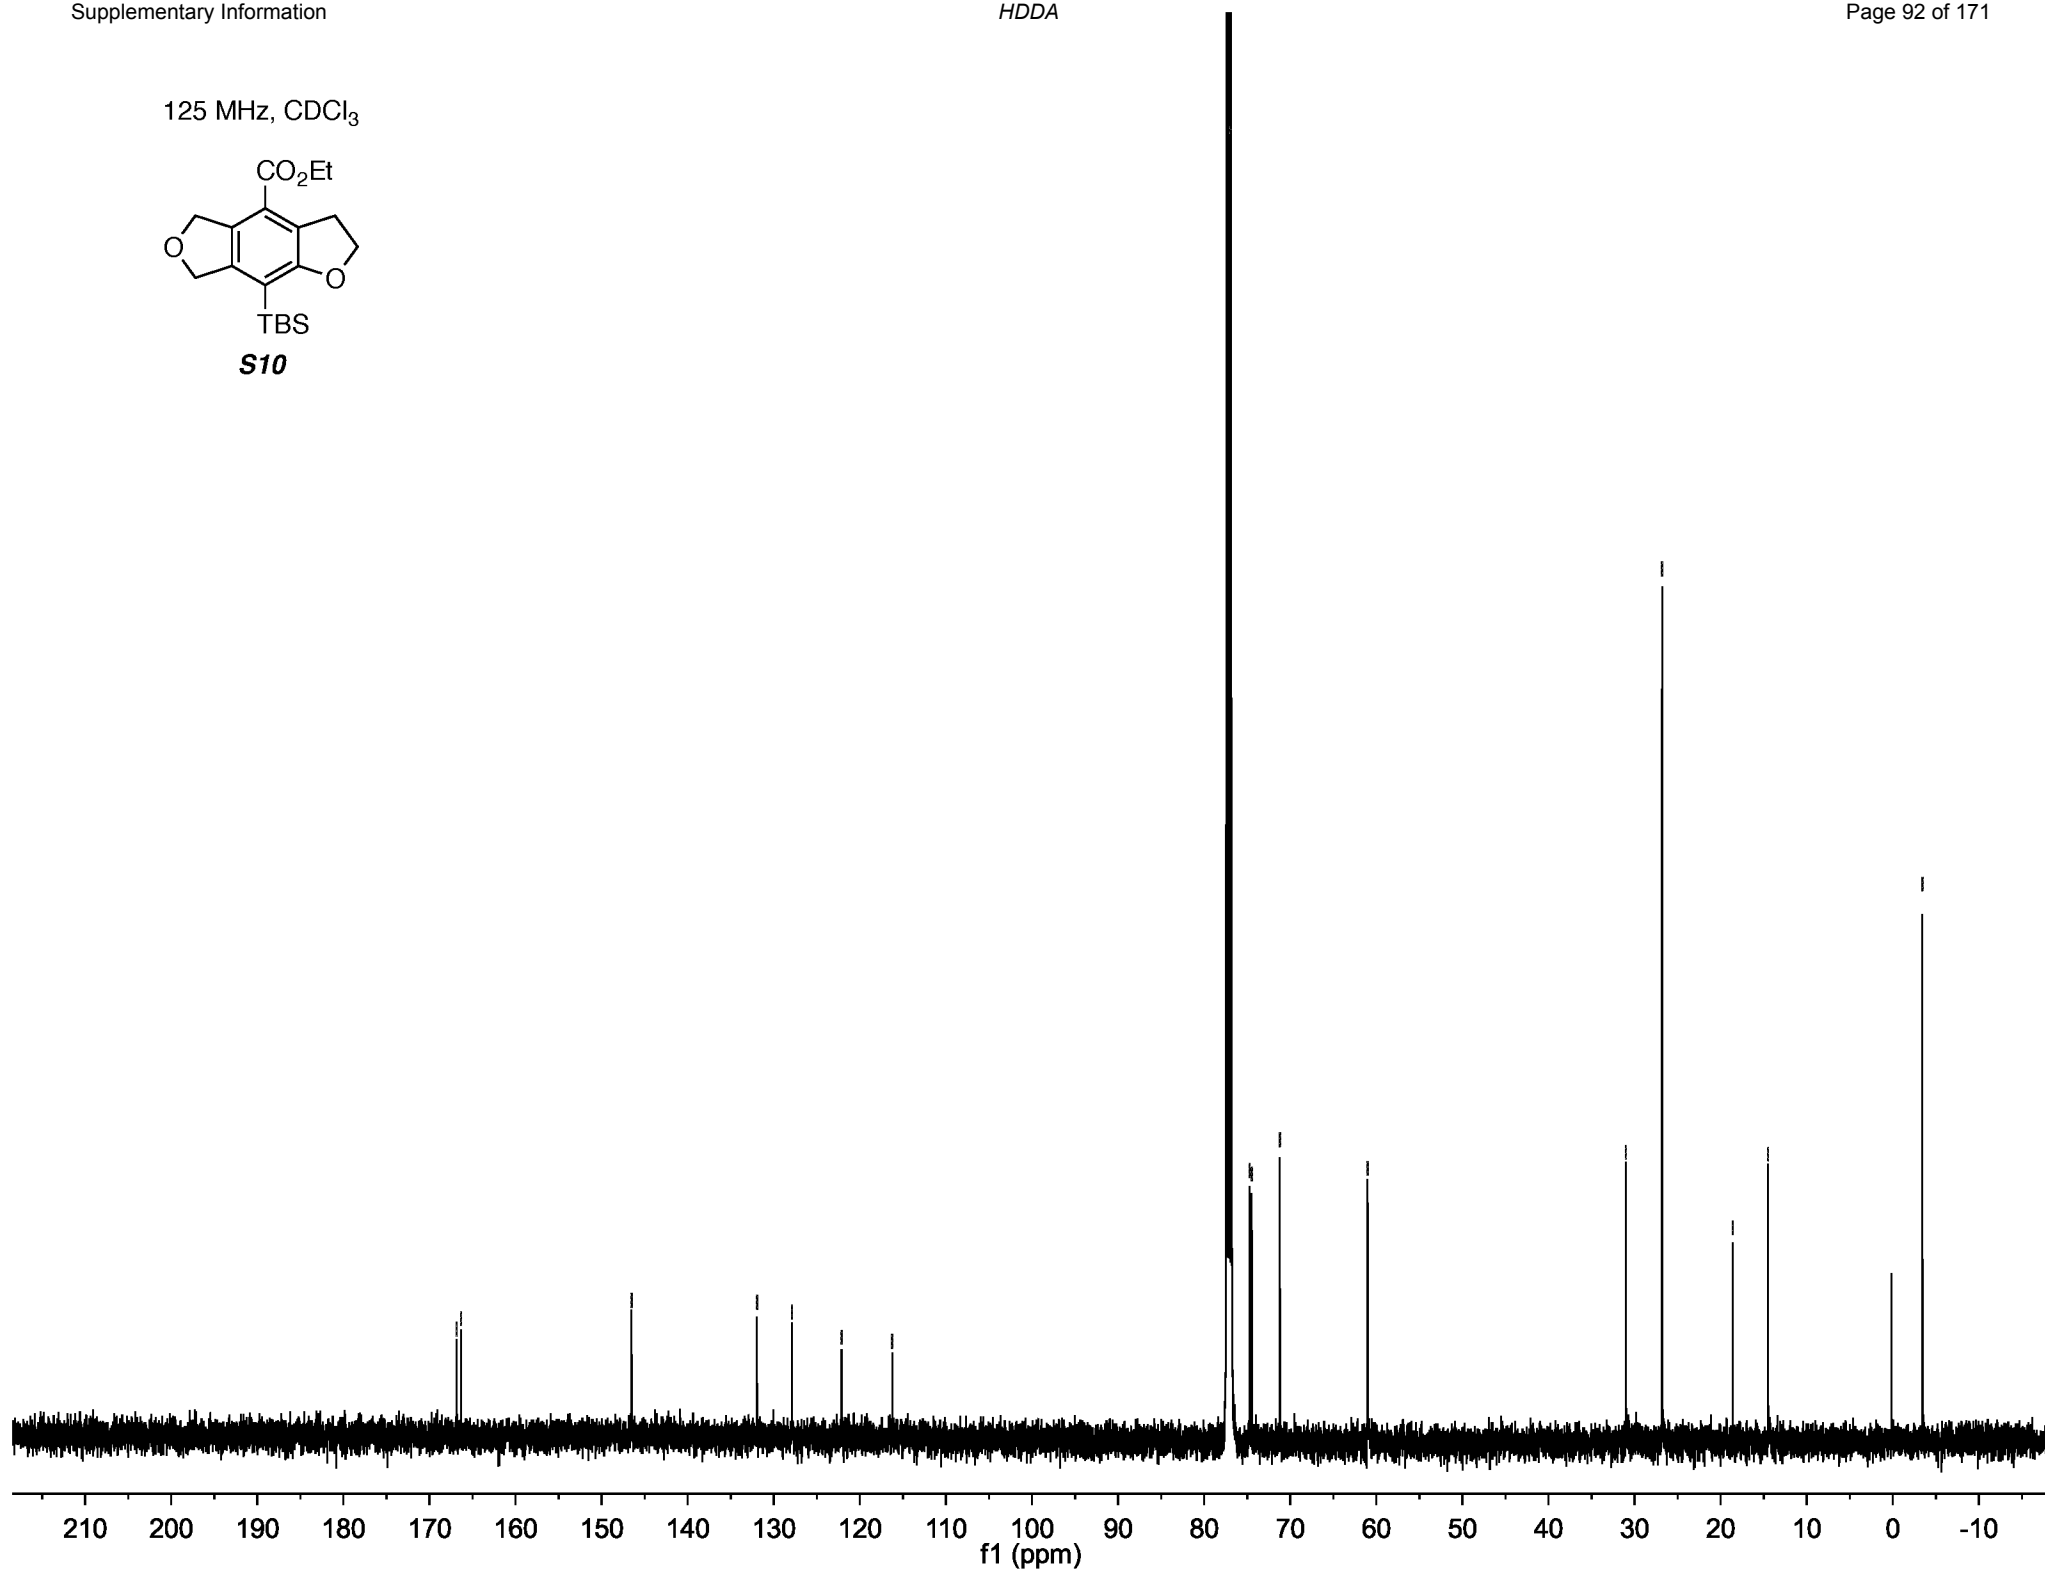

500 MHz, CDCl<sub>3</sub>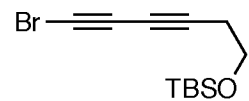**S11**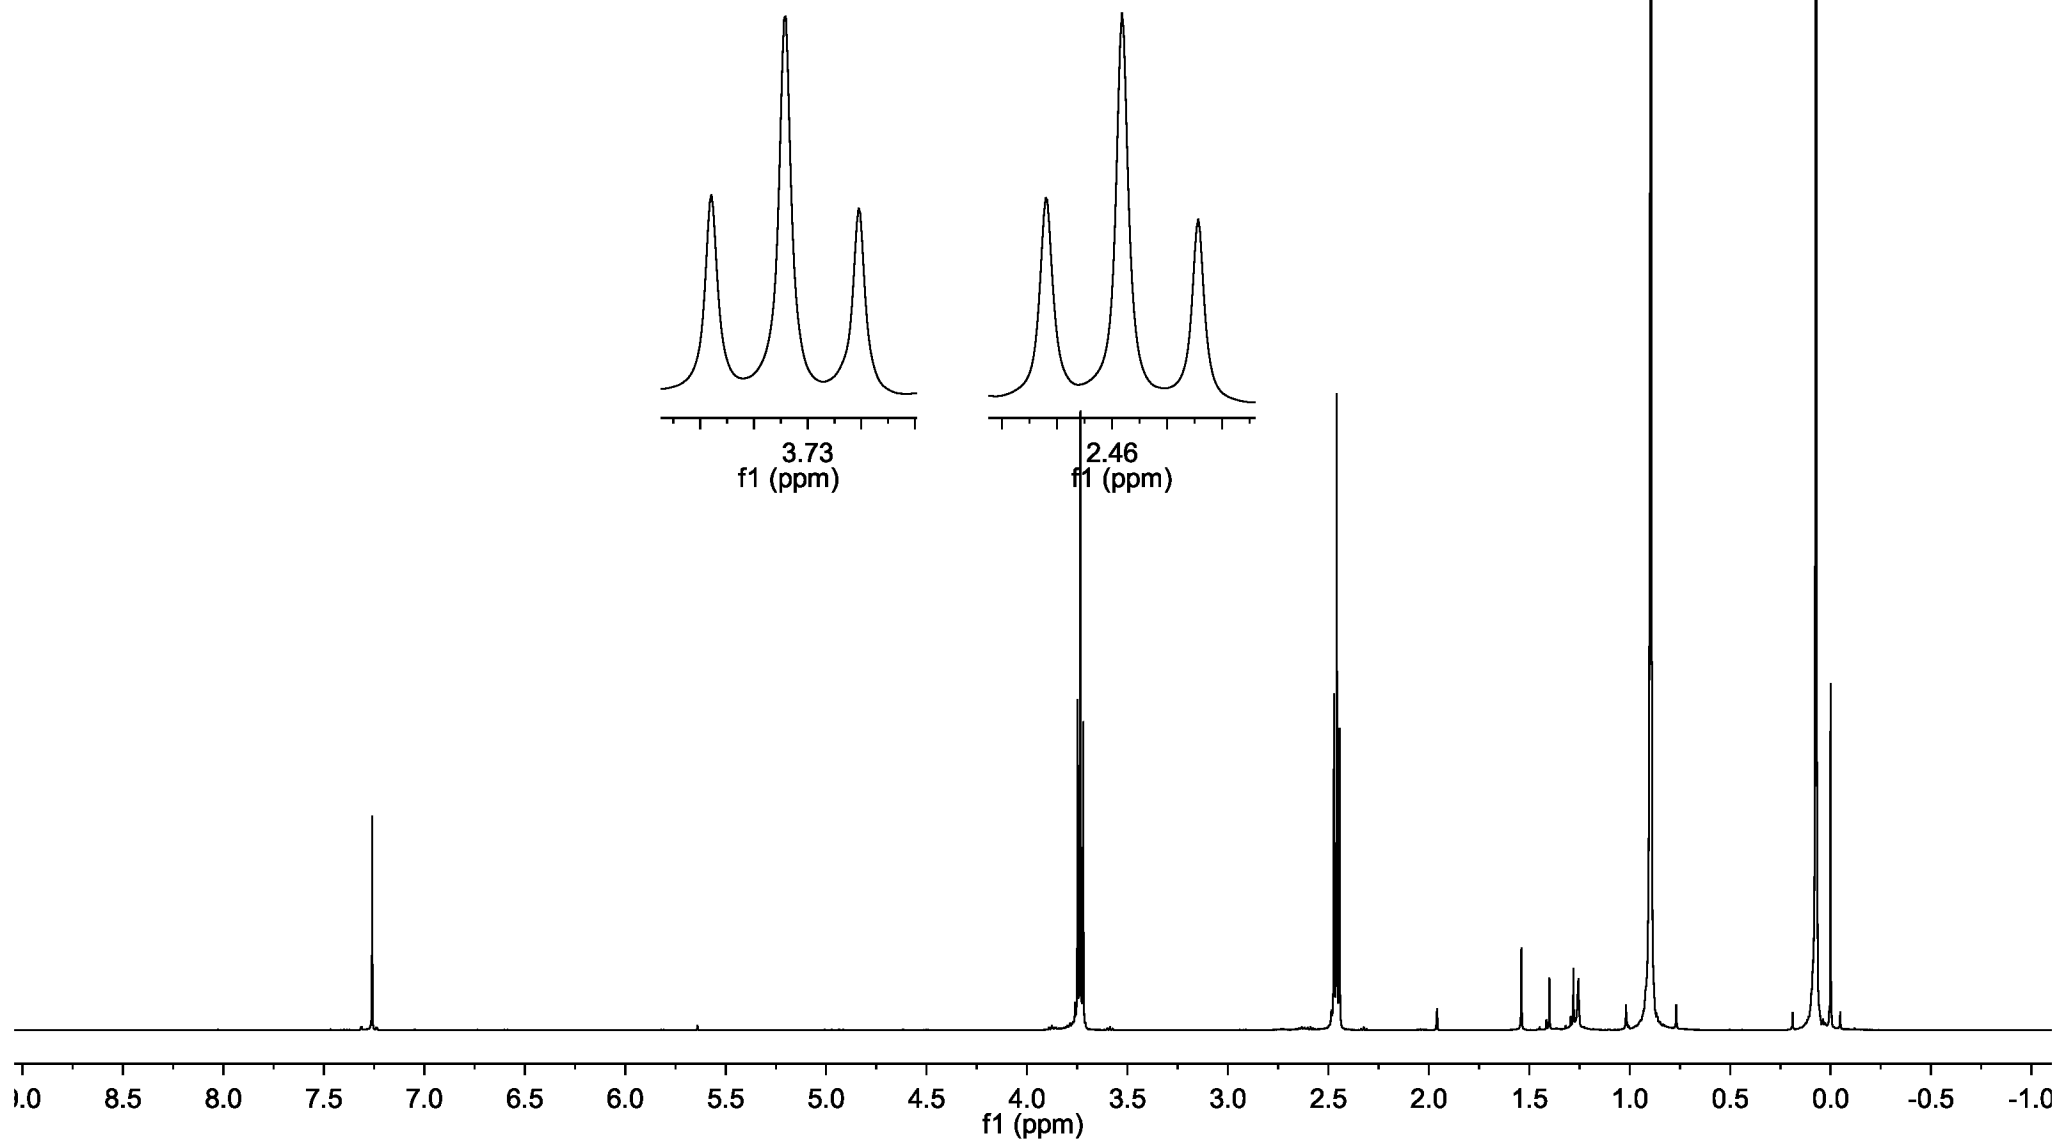

125 MHz, CDCl<sub>3</sub>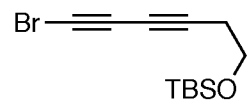**S11**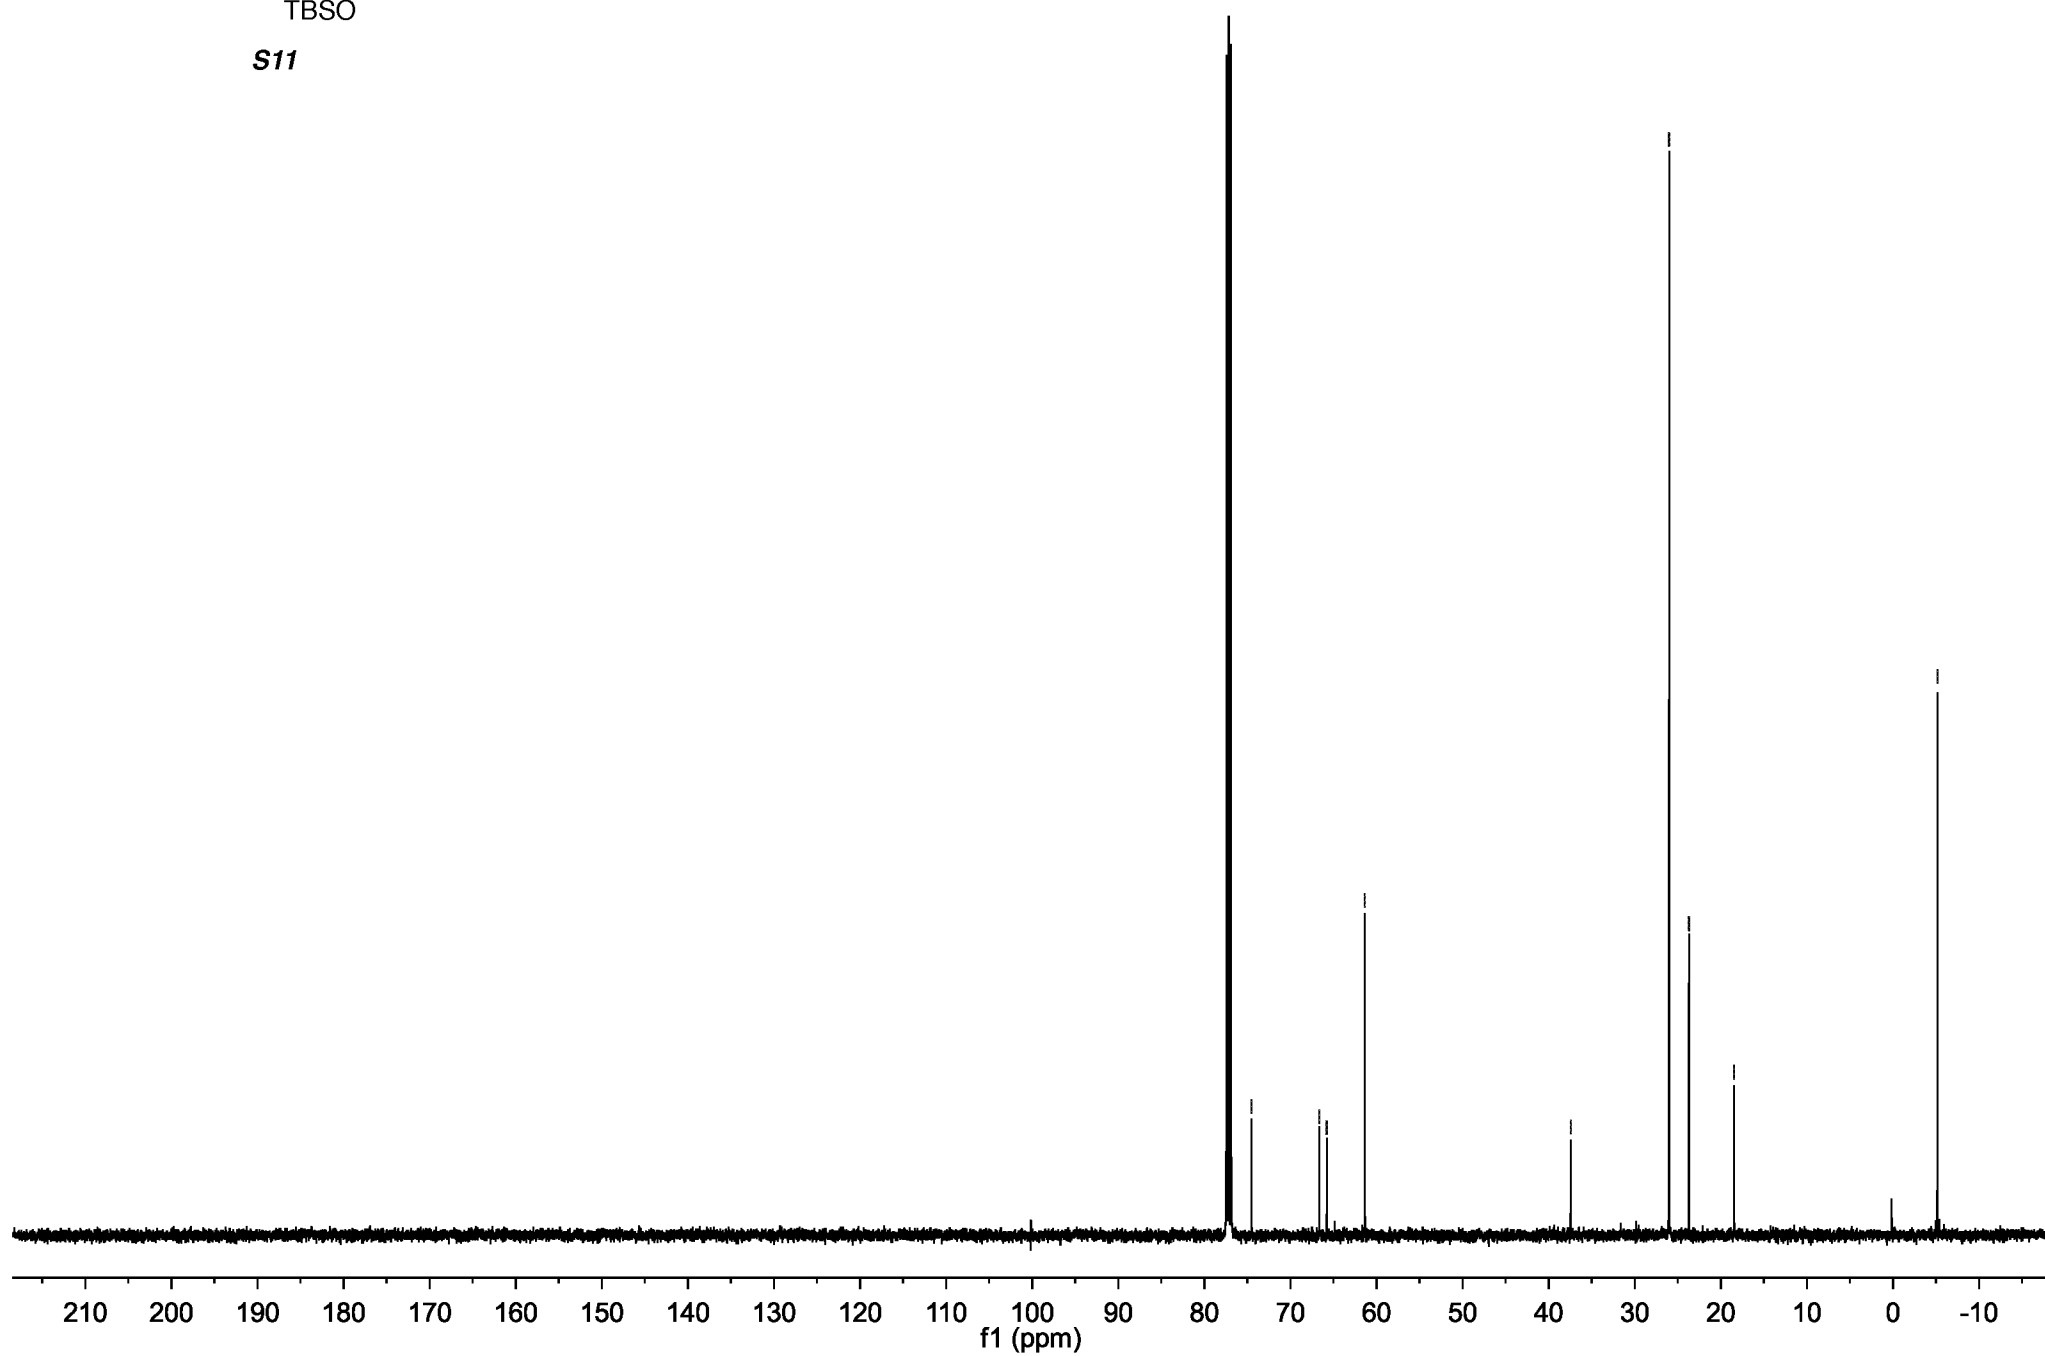

500 MHz, CDCl<sub>3</sub>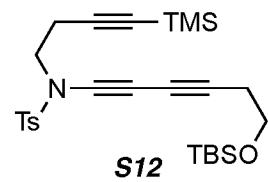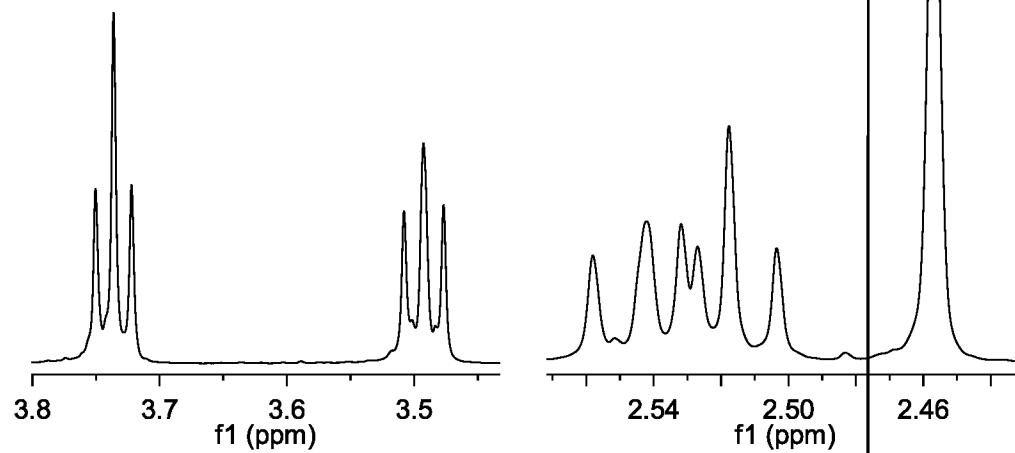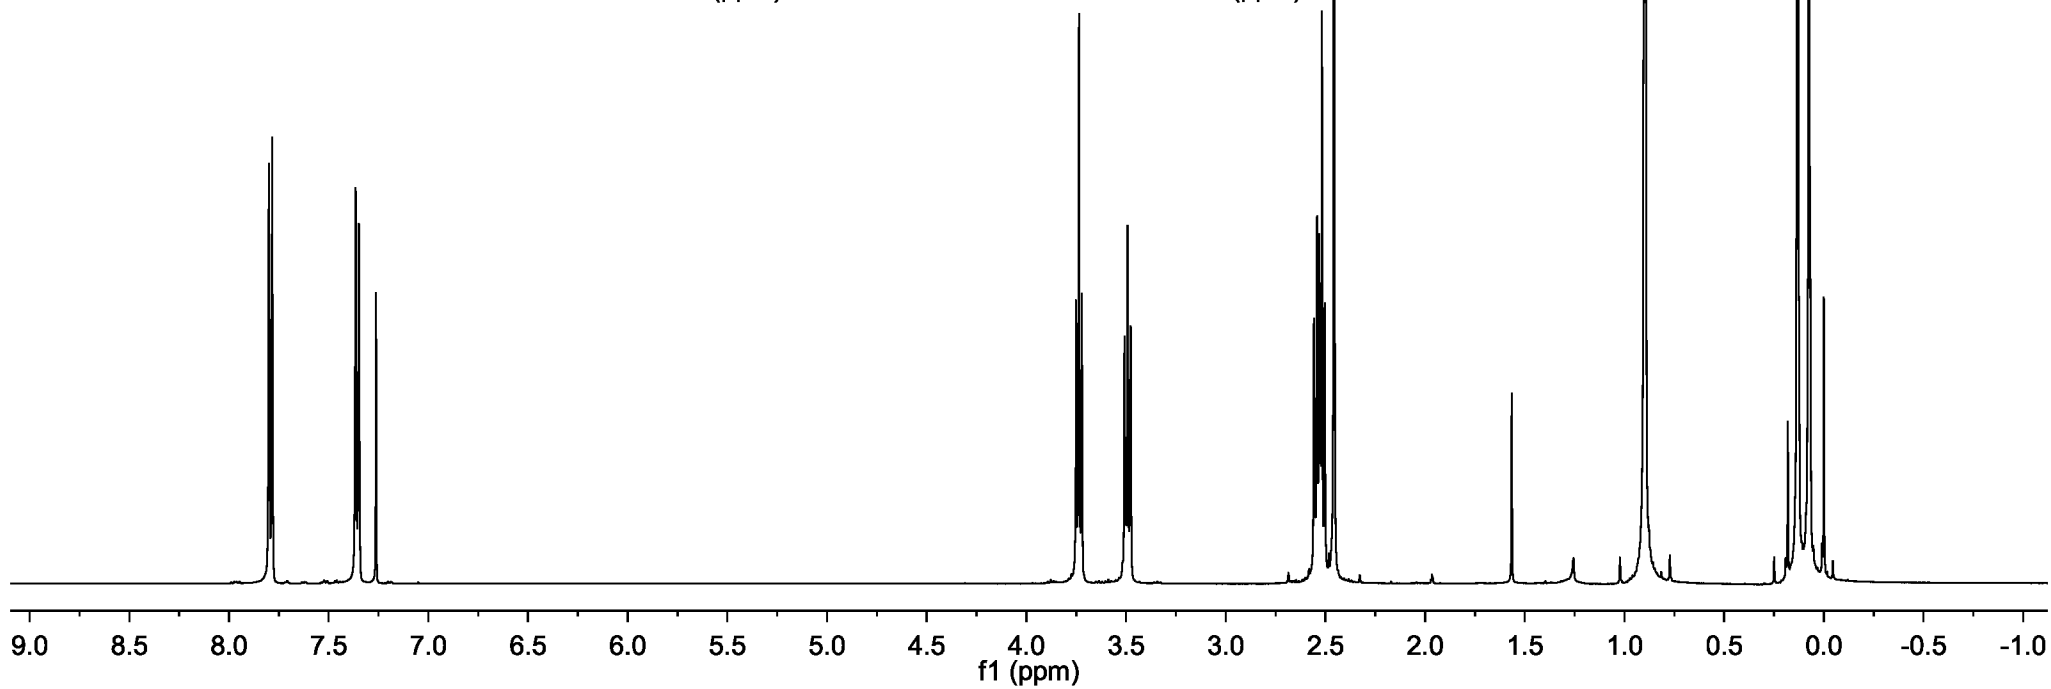

125 MHz, CDCl<sub>3</sub>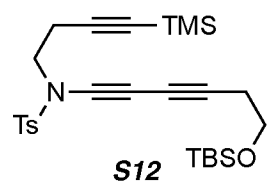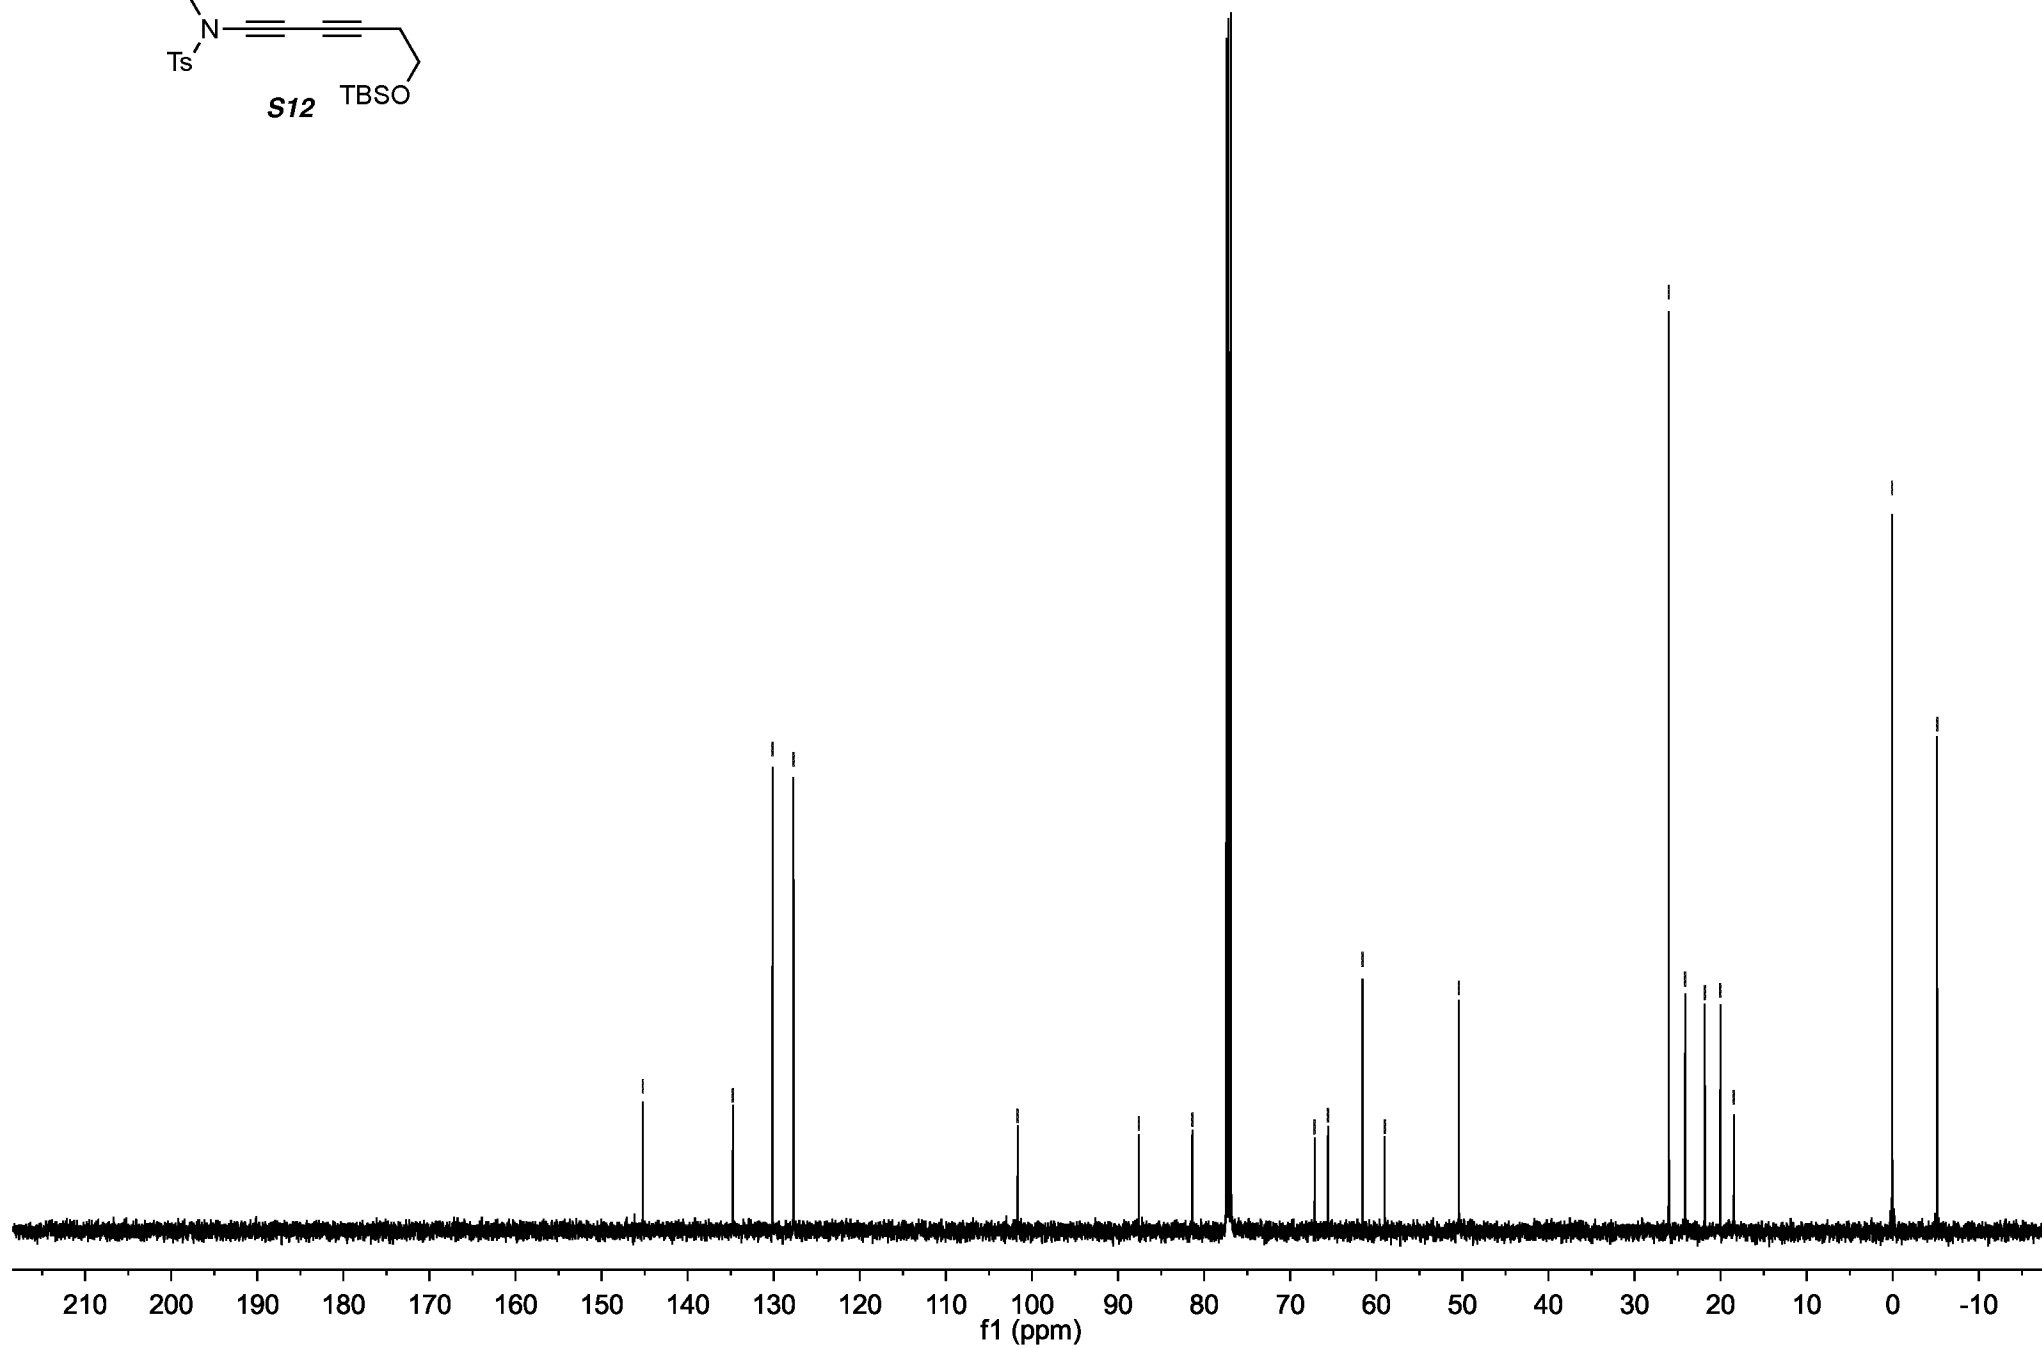



500 MHz, CDCl<sub>3</sub>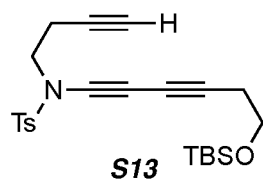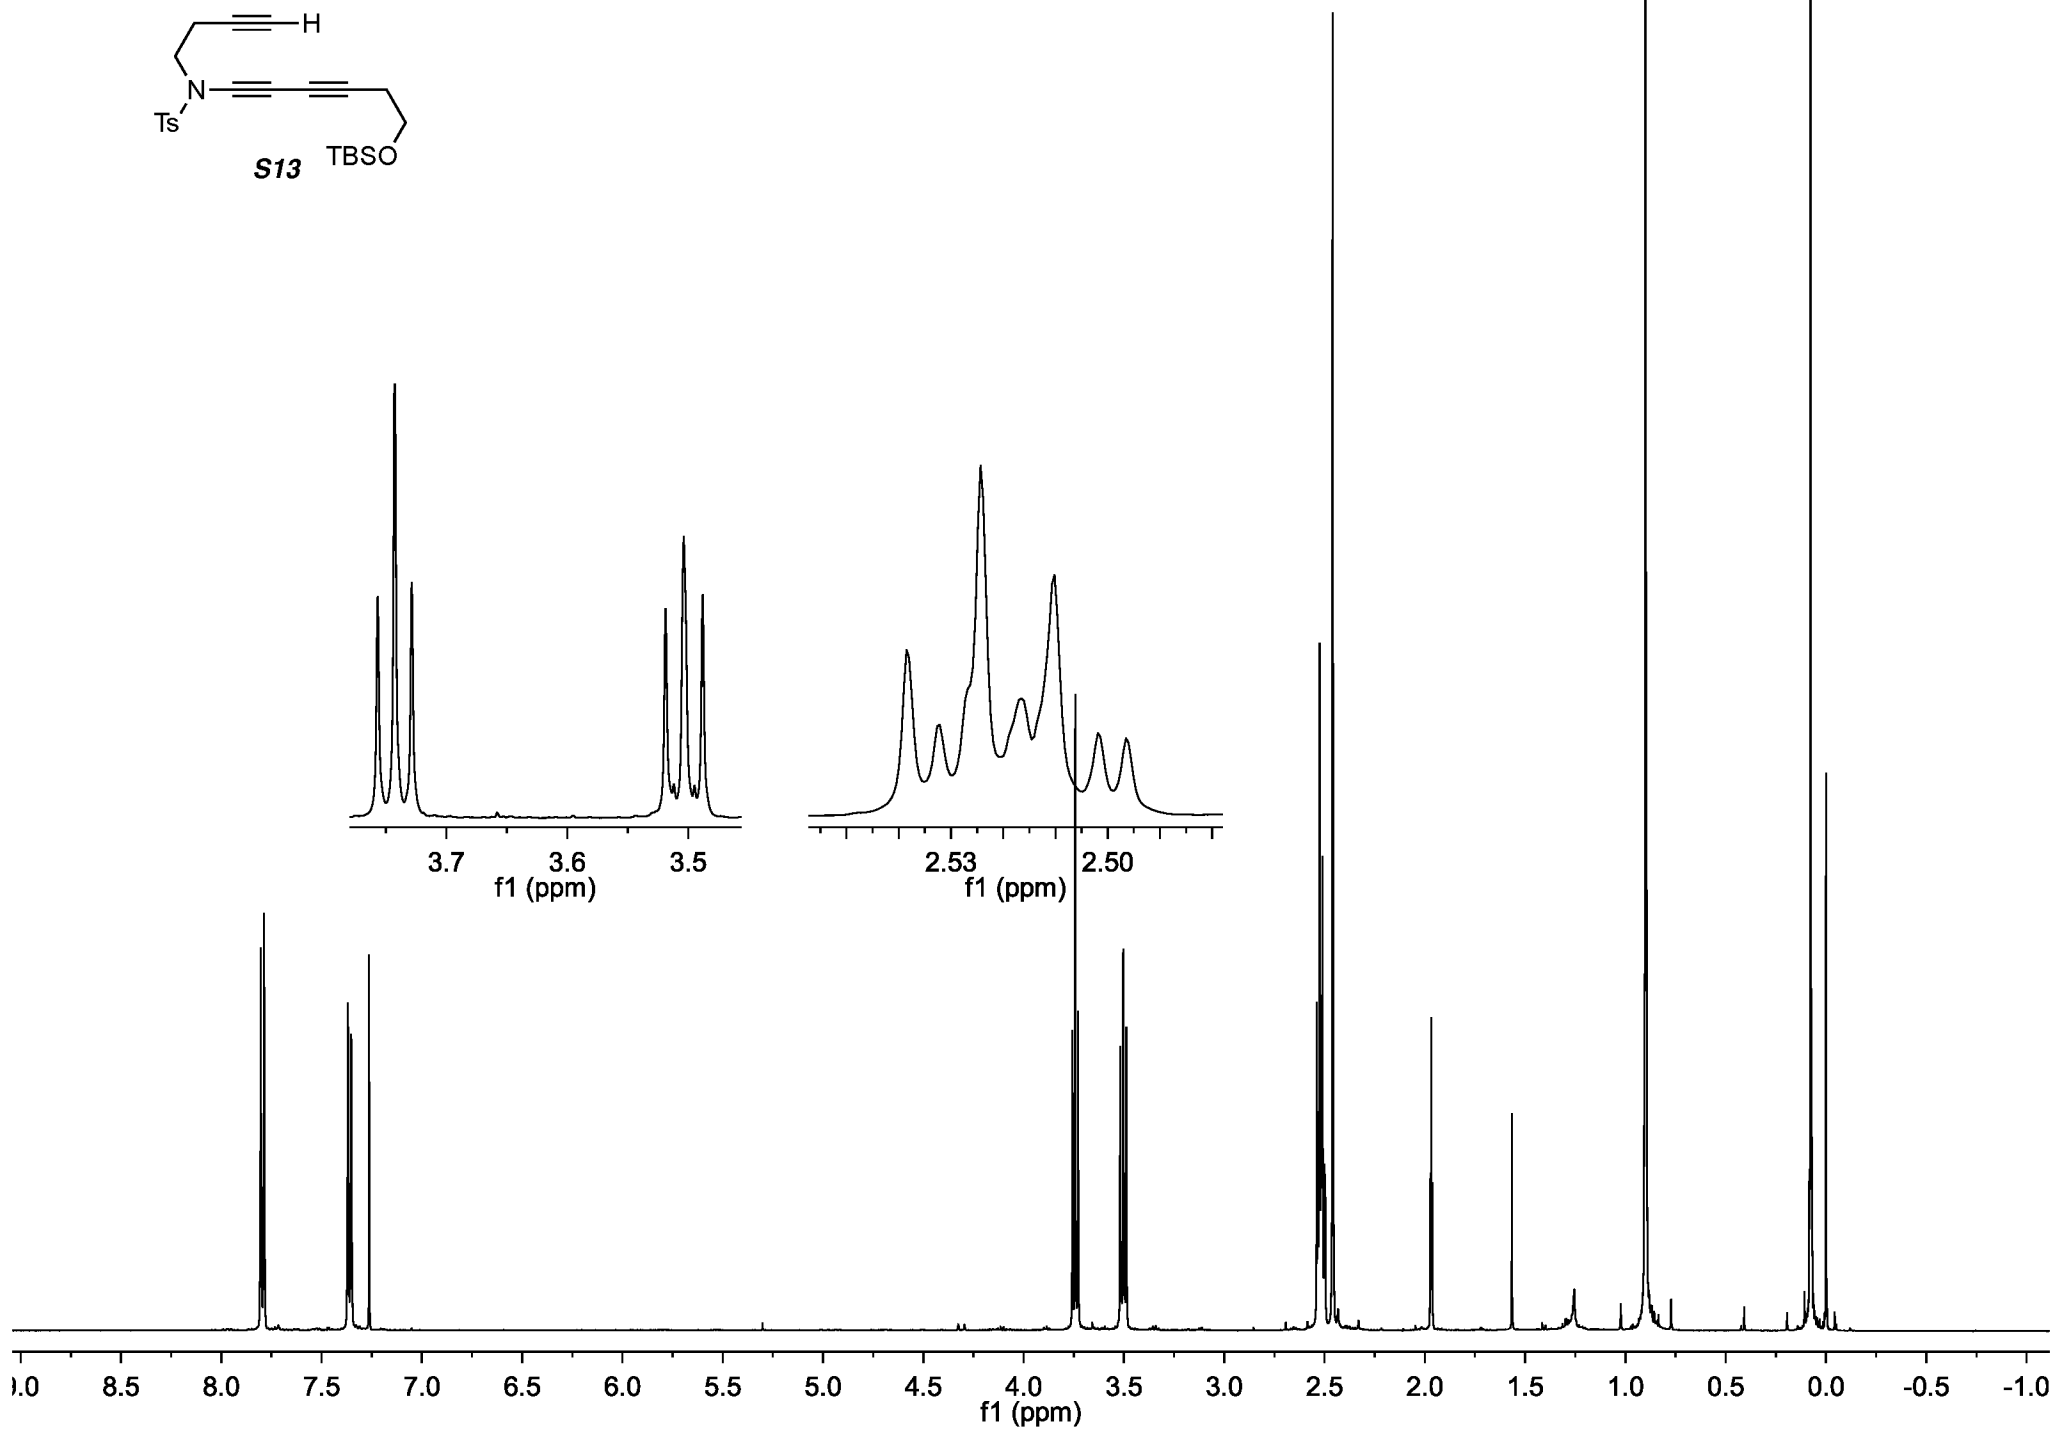

125 MHz, CDCl<sub>3</sub>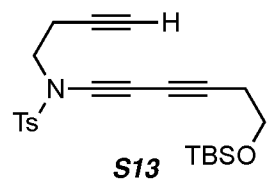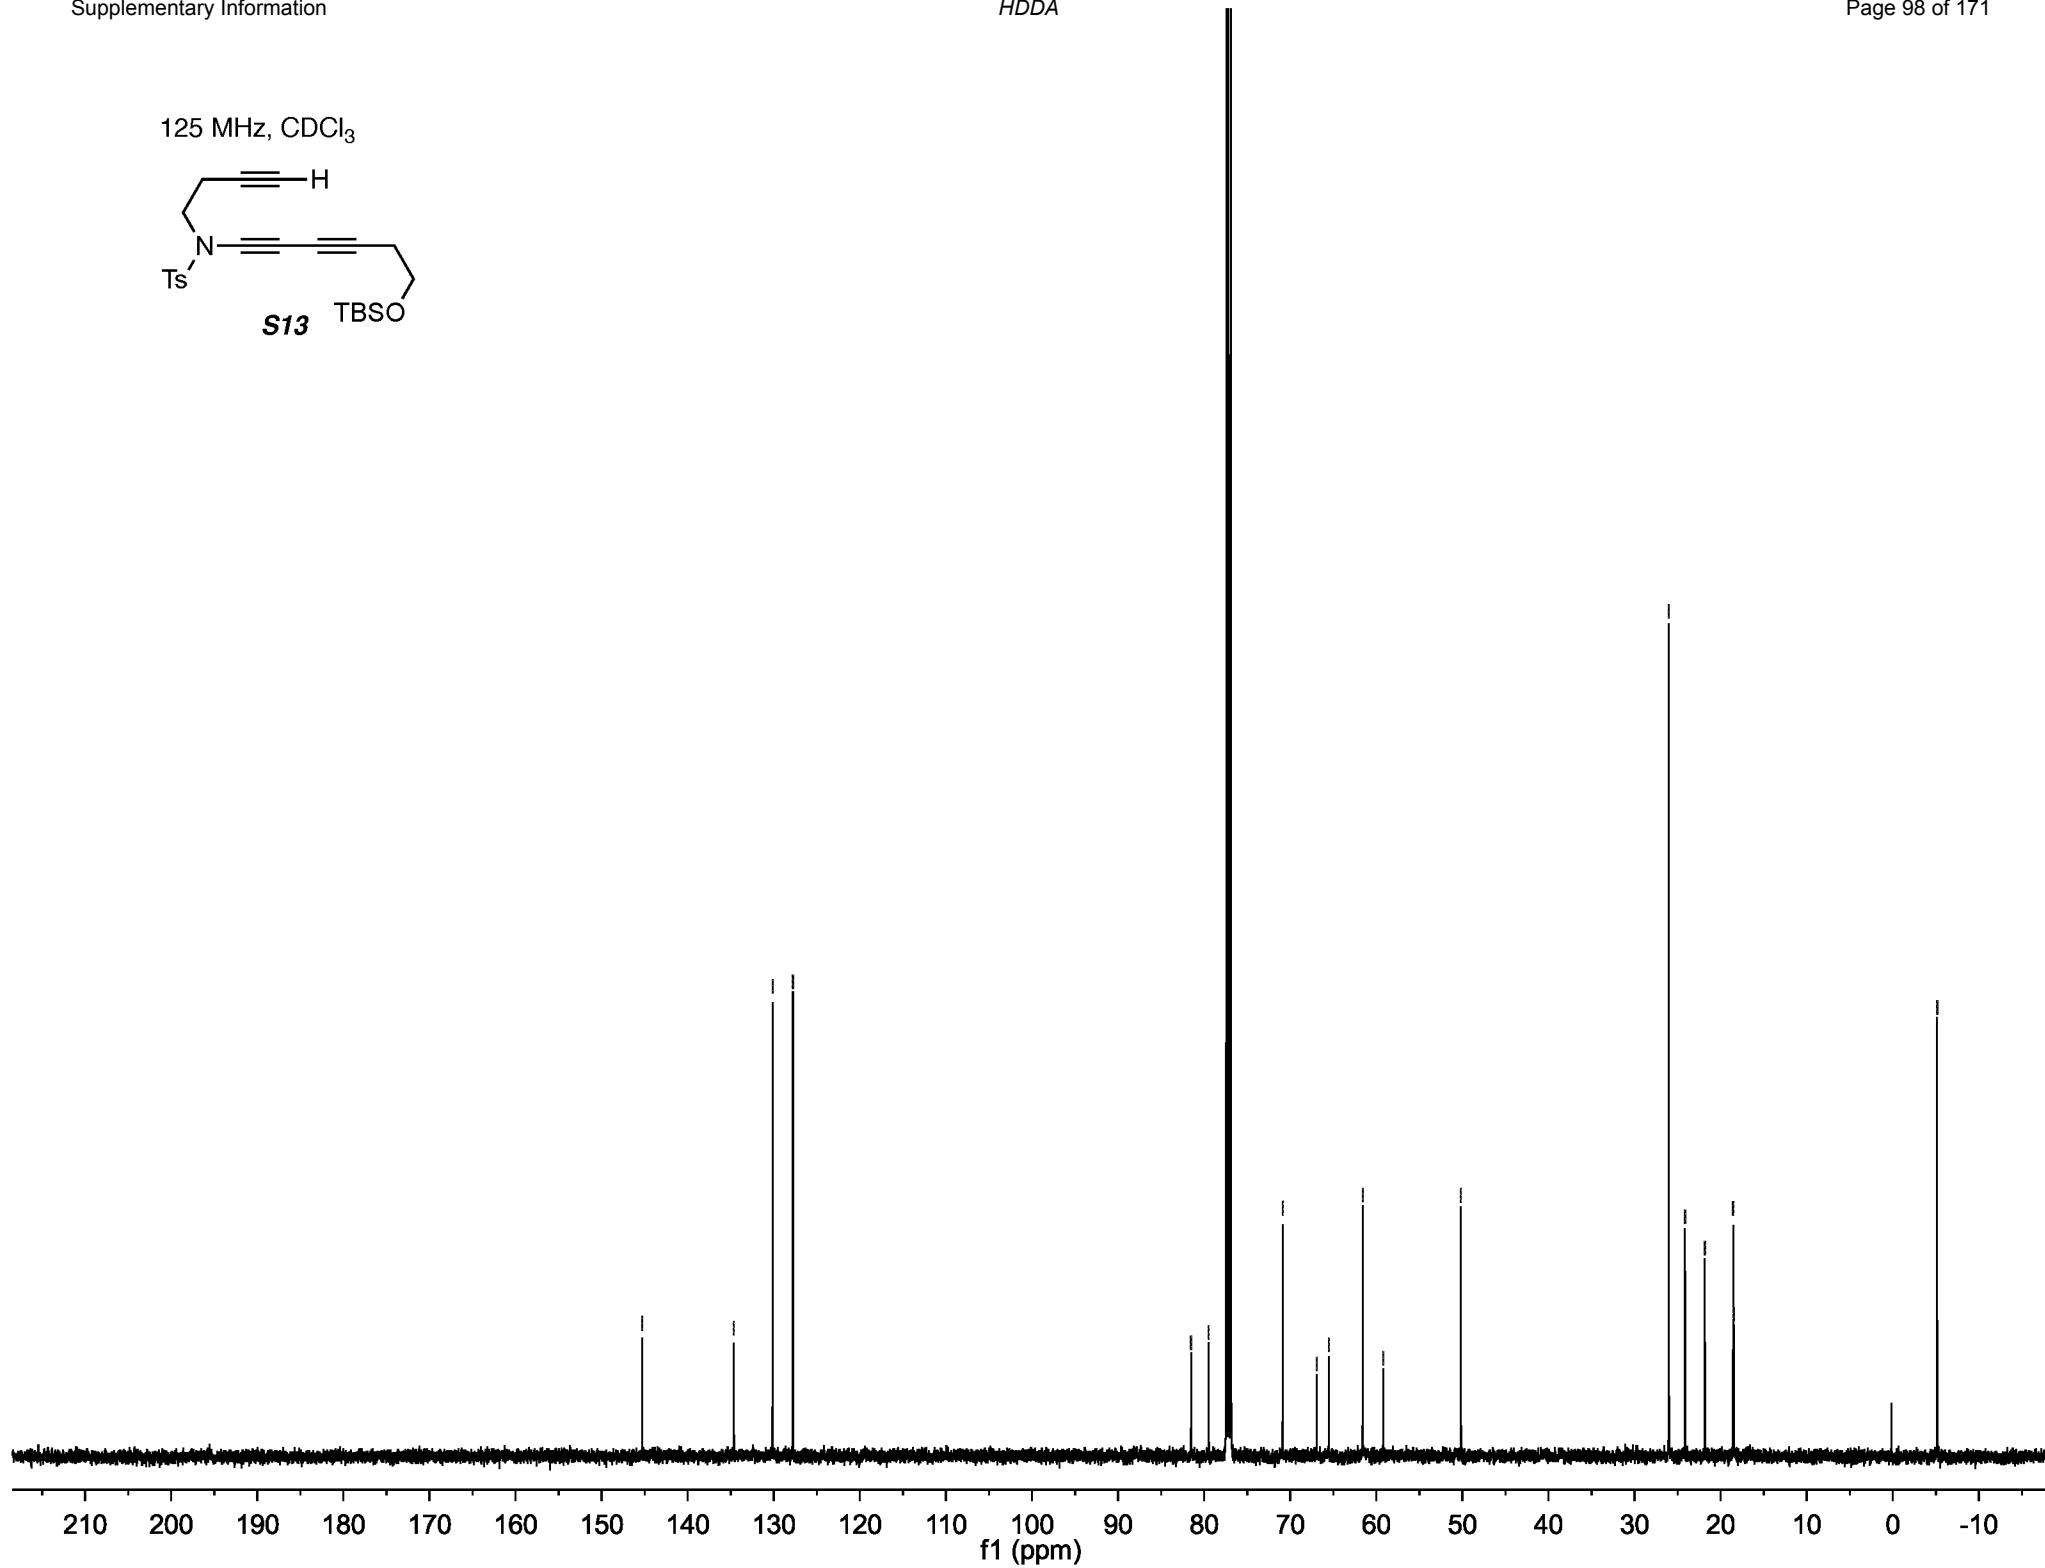

500 MHz, CDCl<sub>3</sub>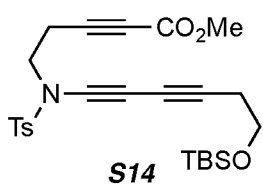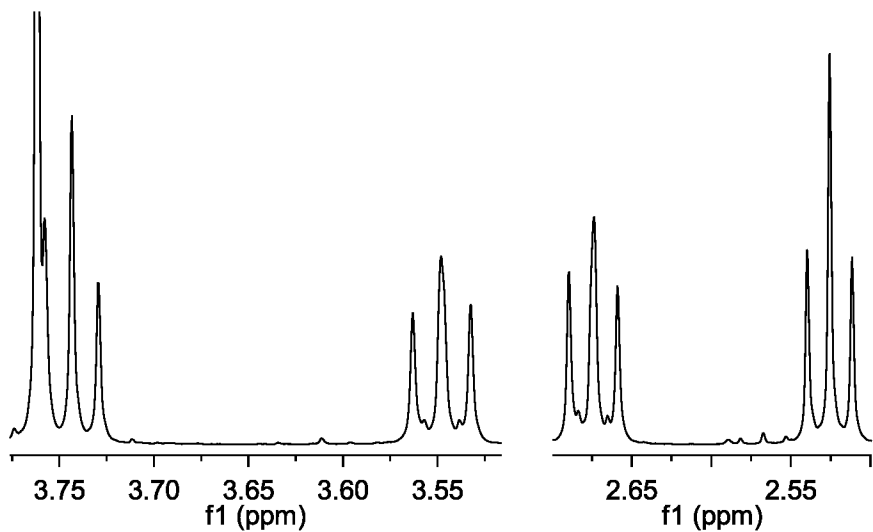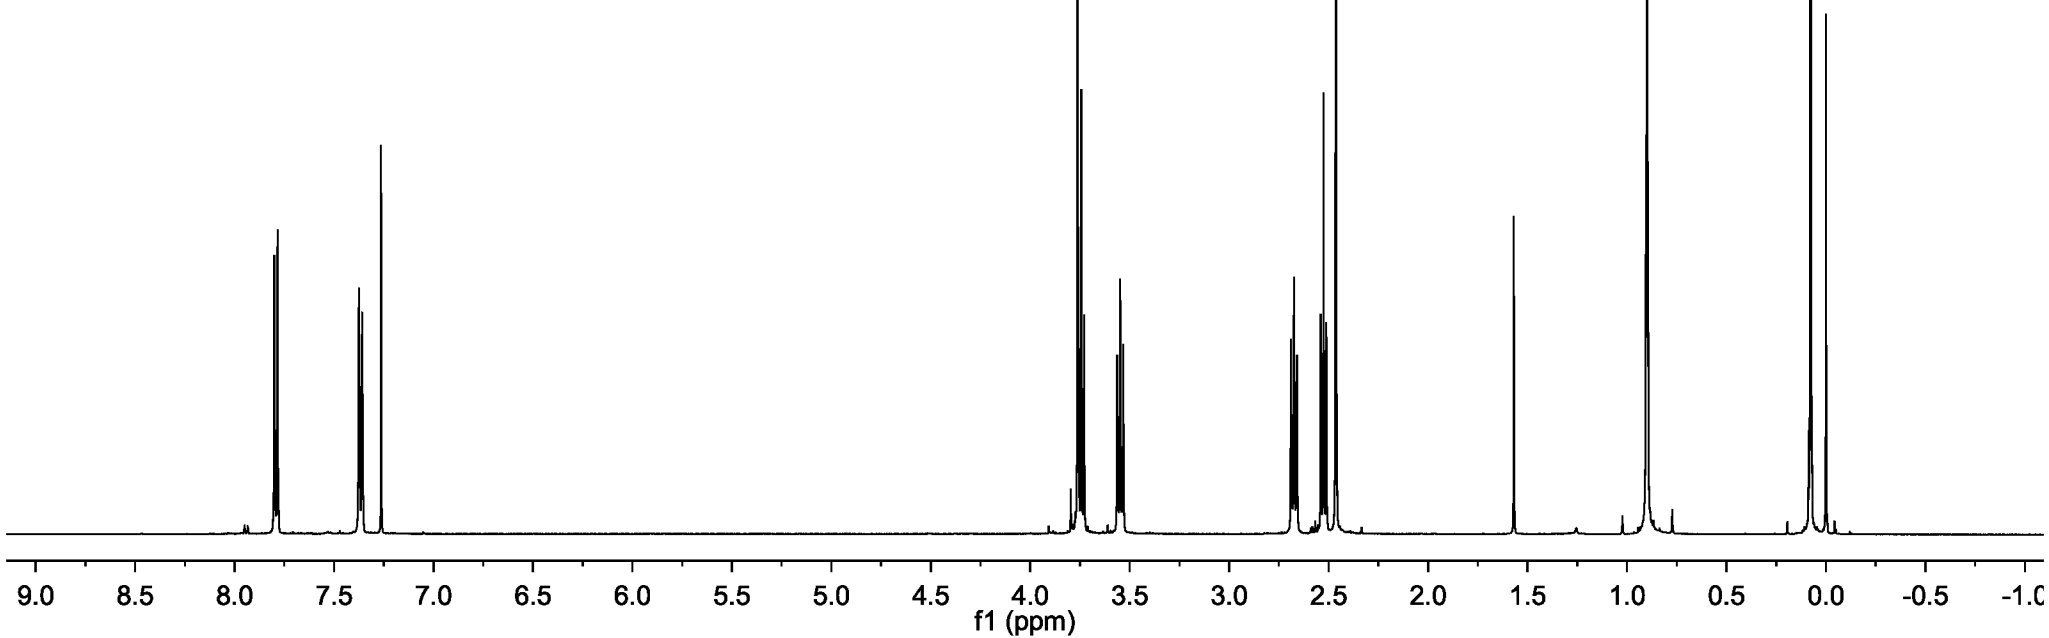

125 MHz, CDCl<sub>3</sub>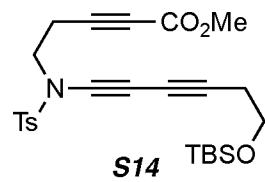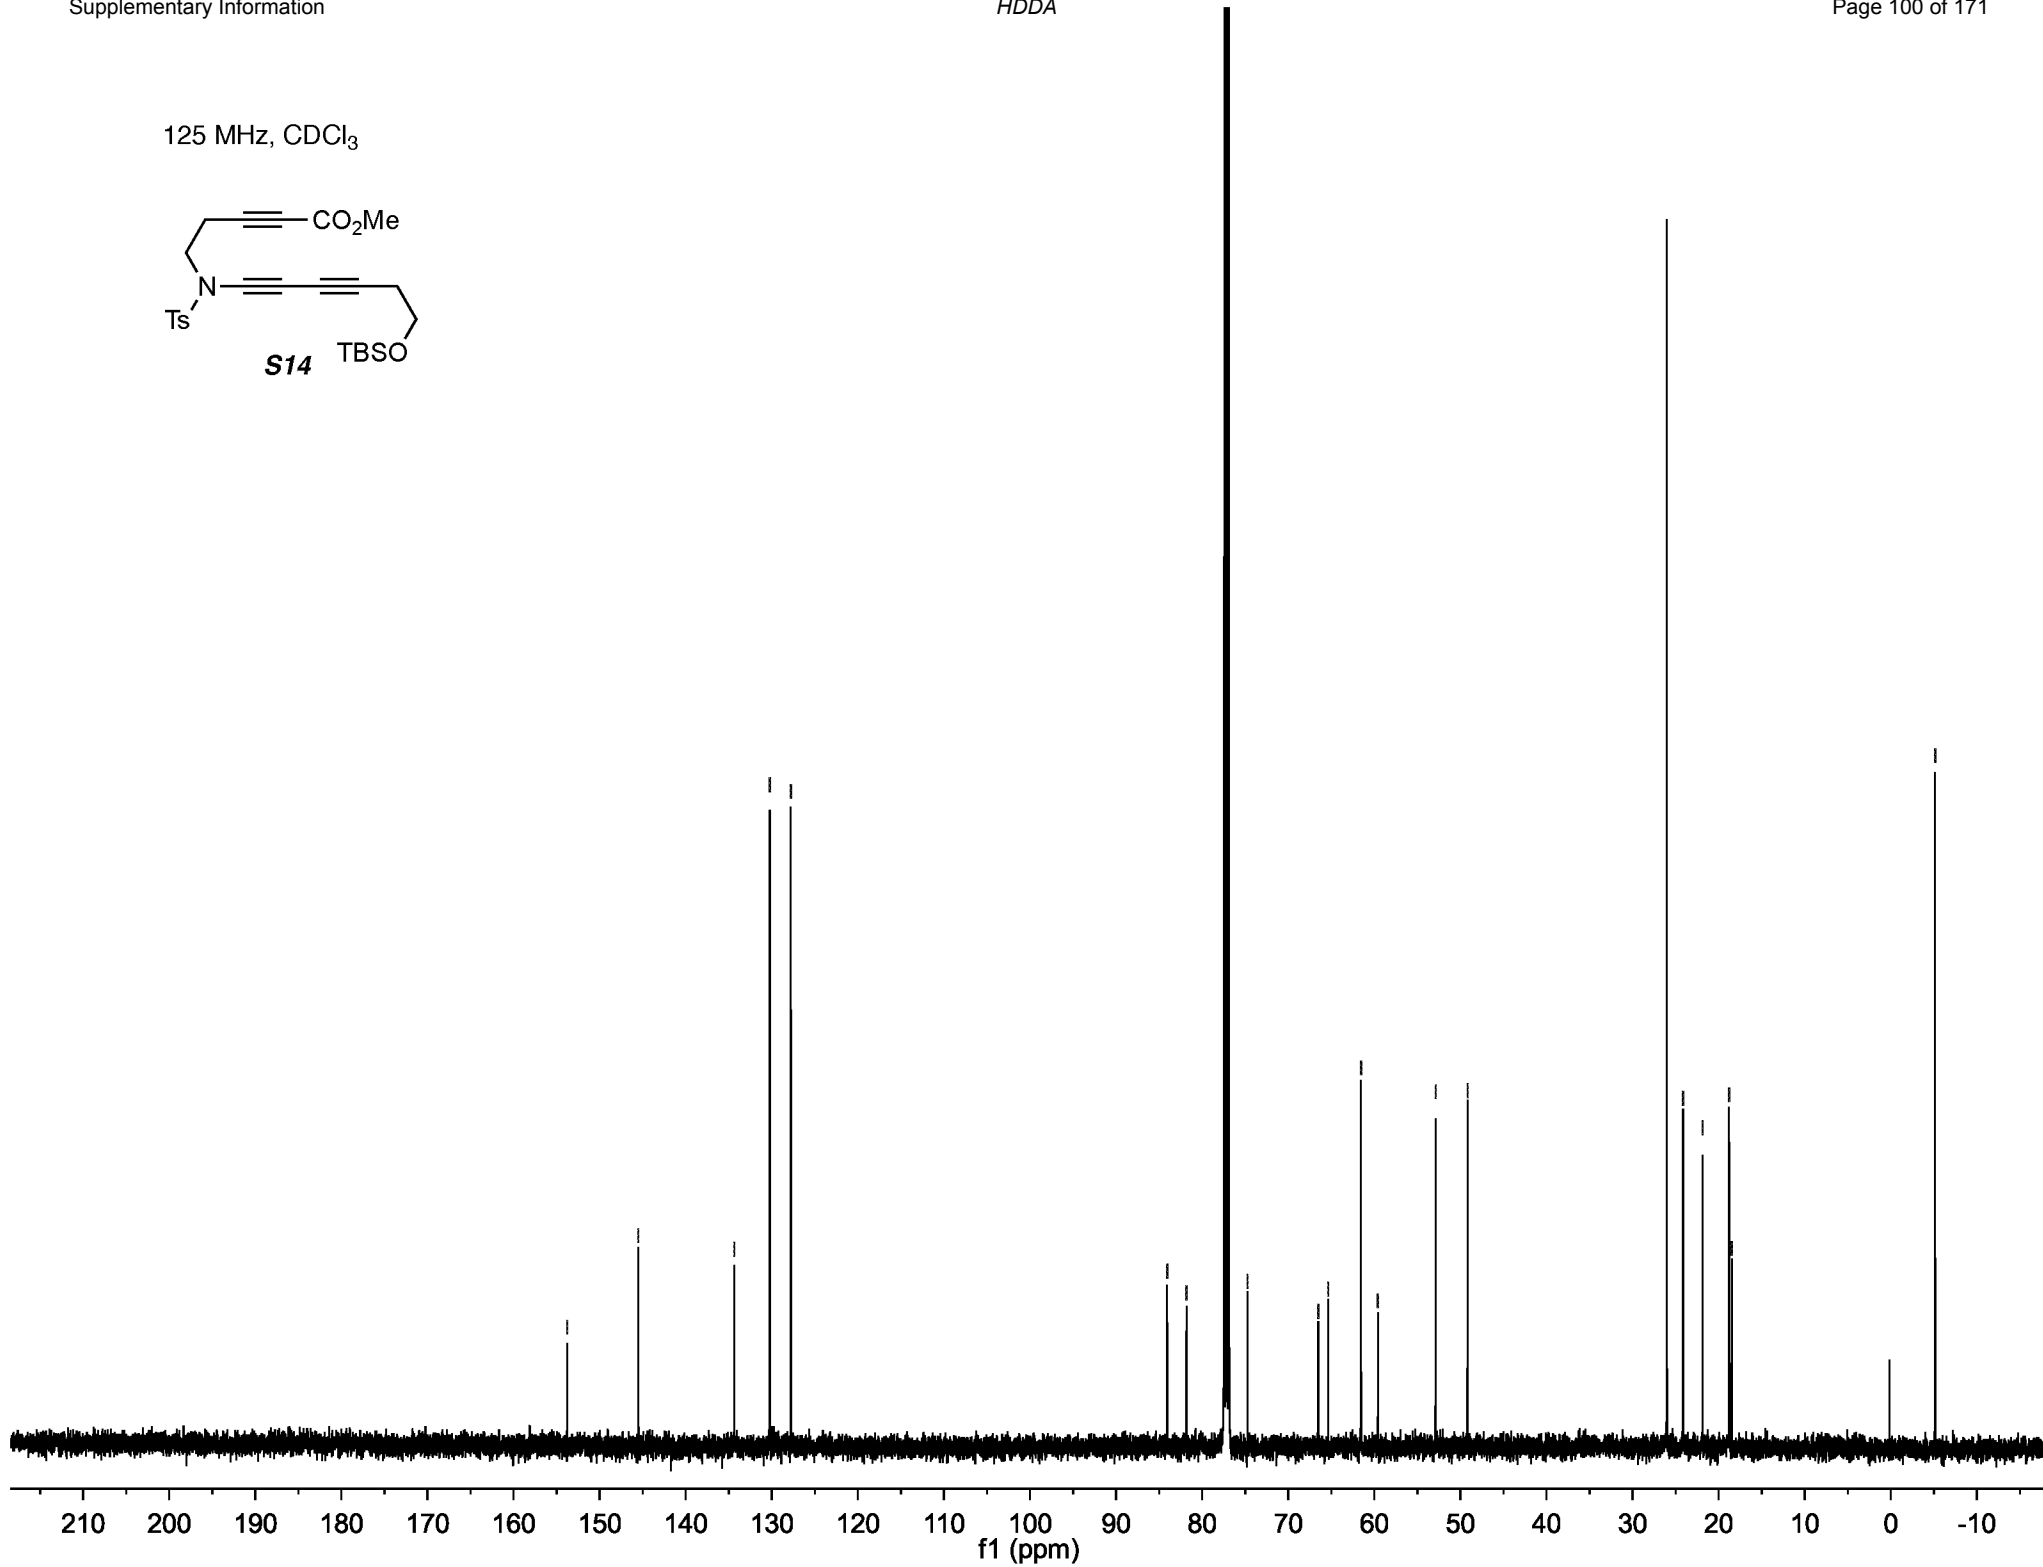

500 MHz, CDCl<sub>3</sub>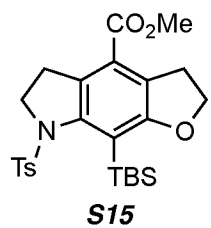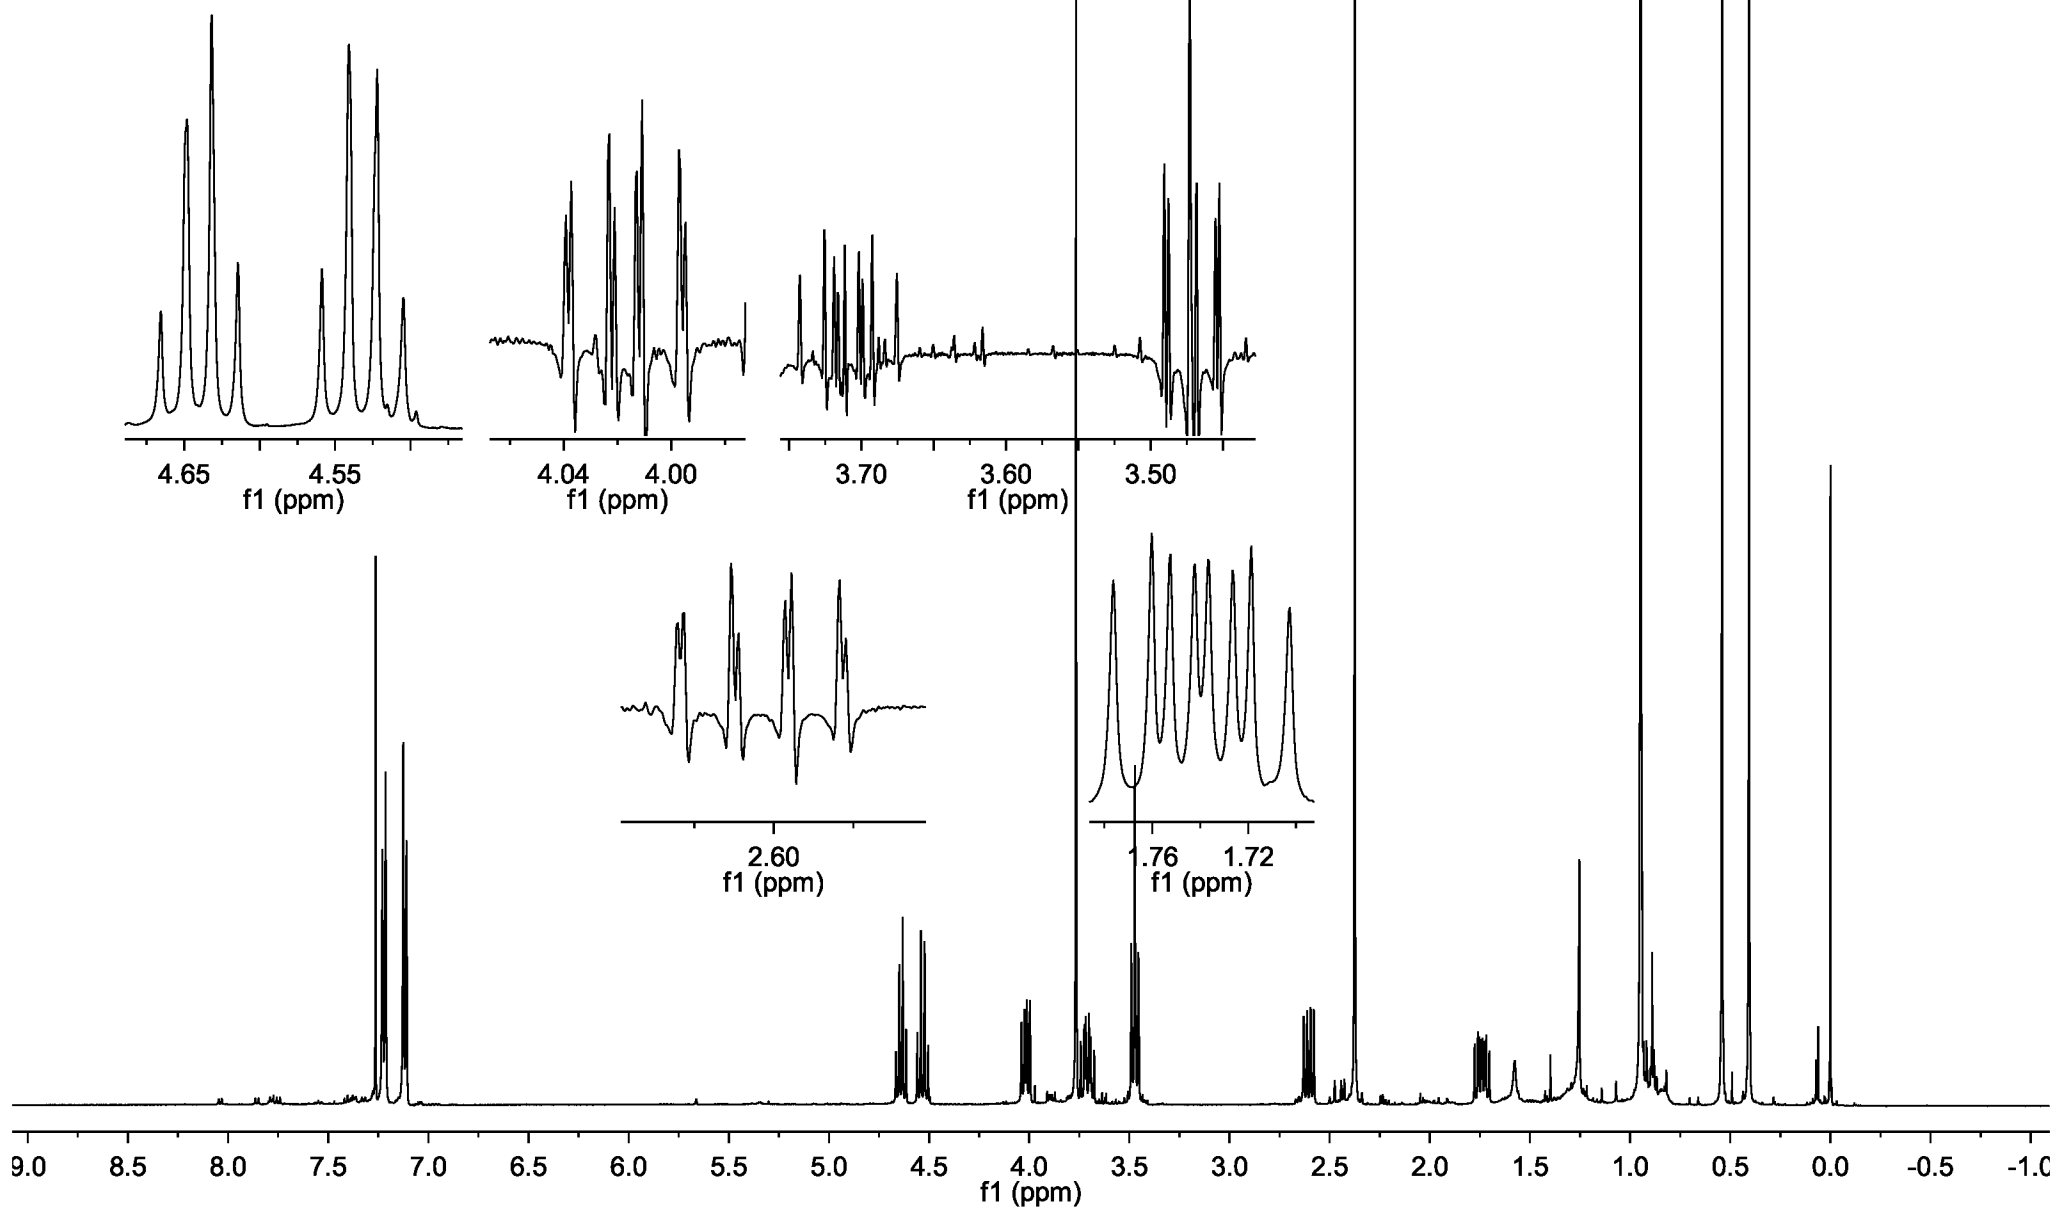

125 MHz, CDCl<sub>3</sub>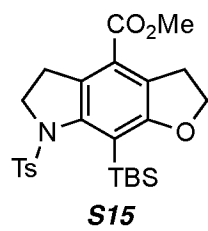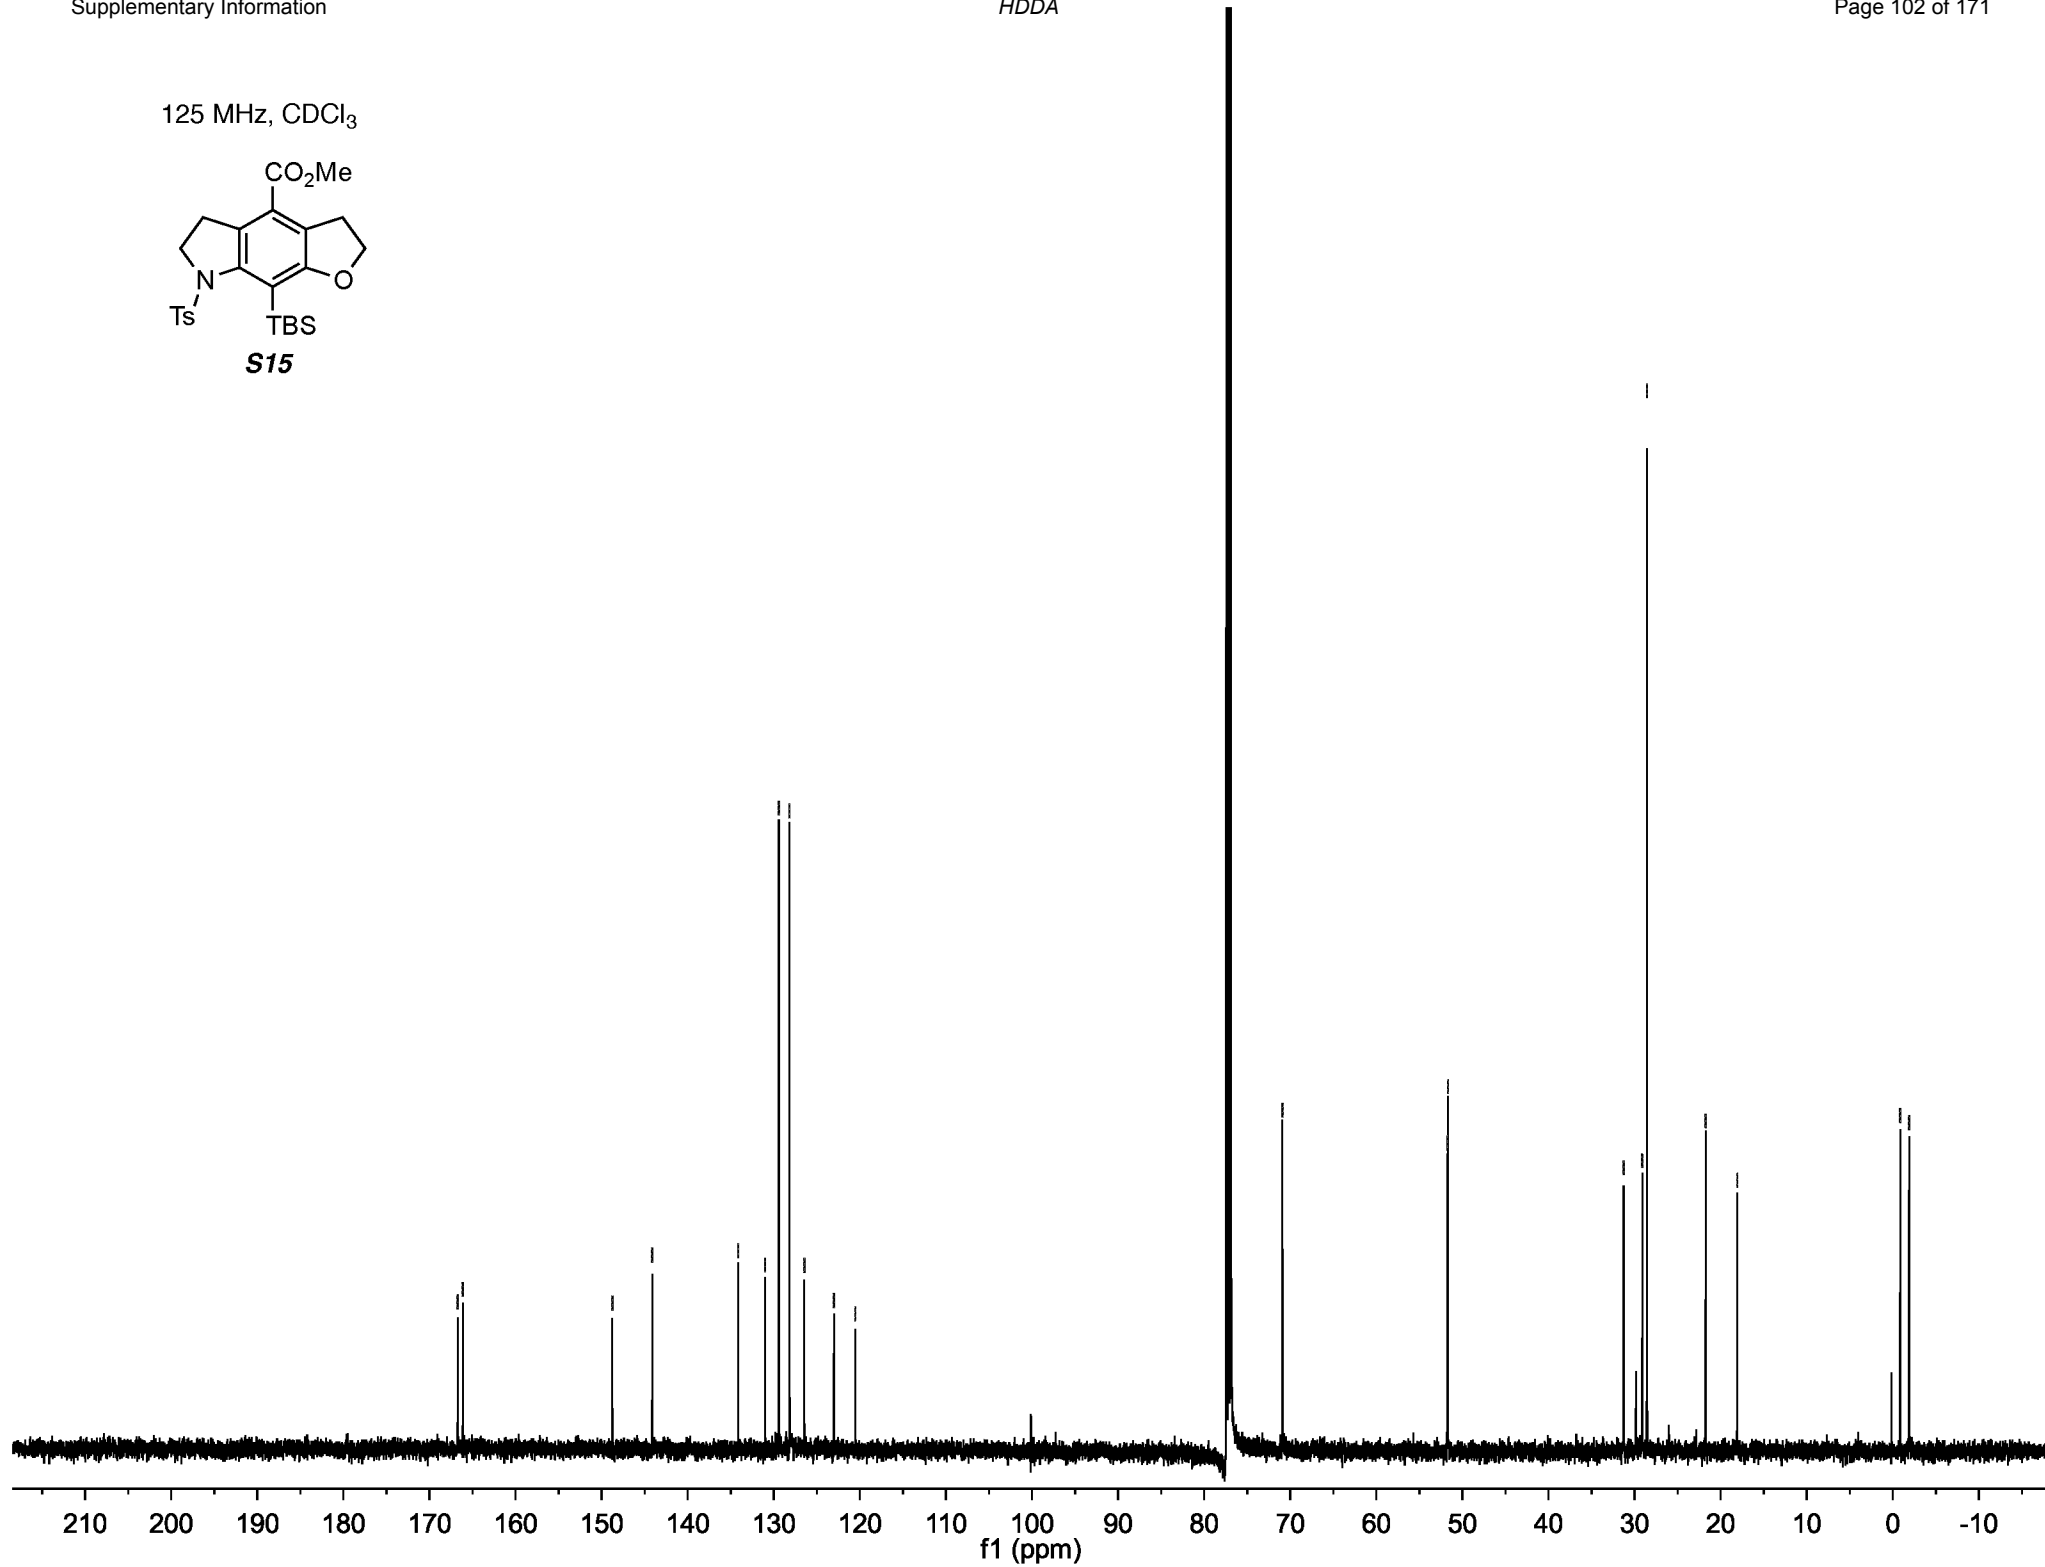

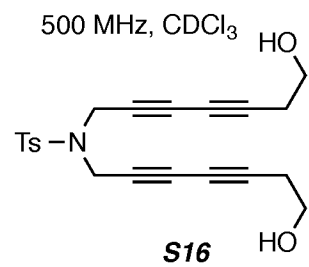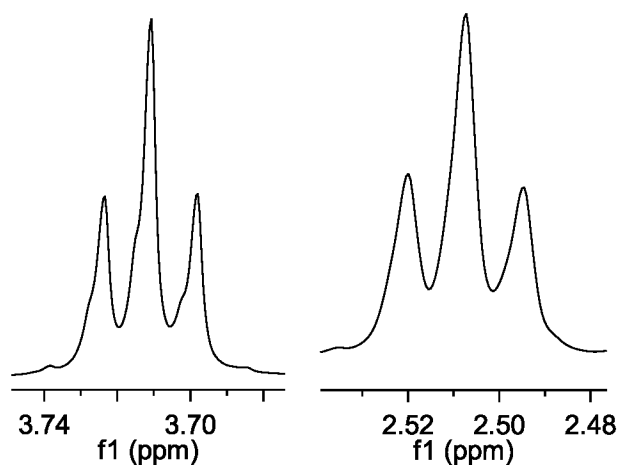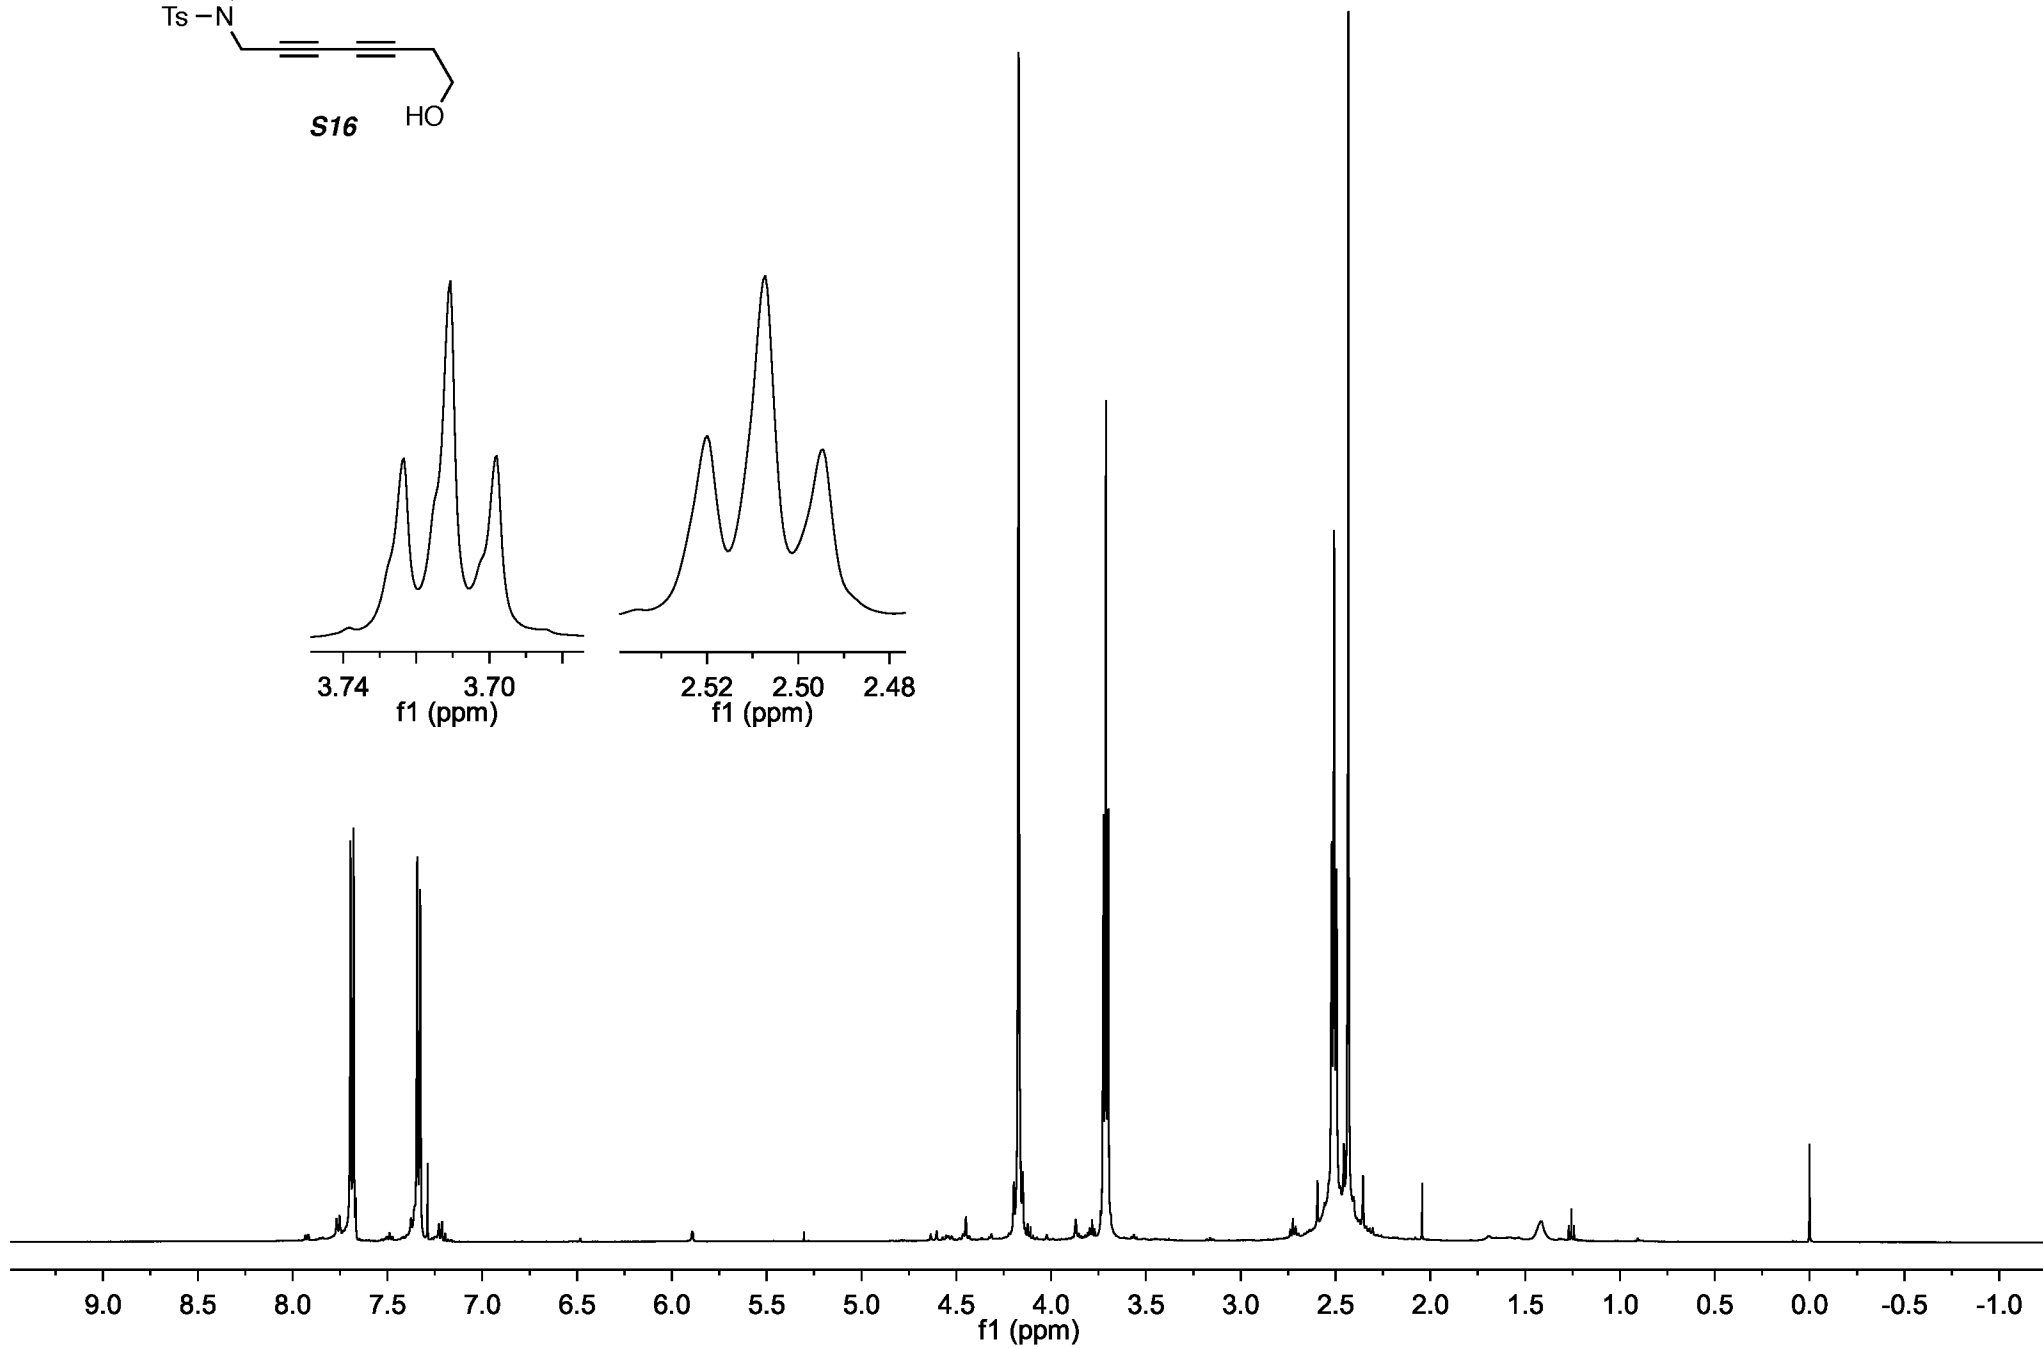

75 MHz, CDCl<sub>3</sub>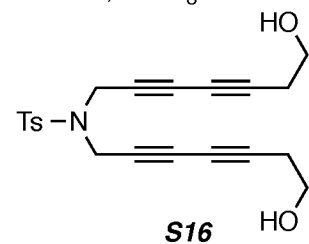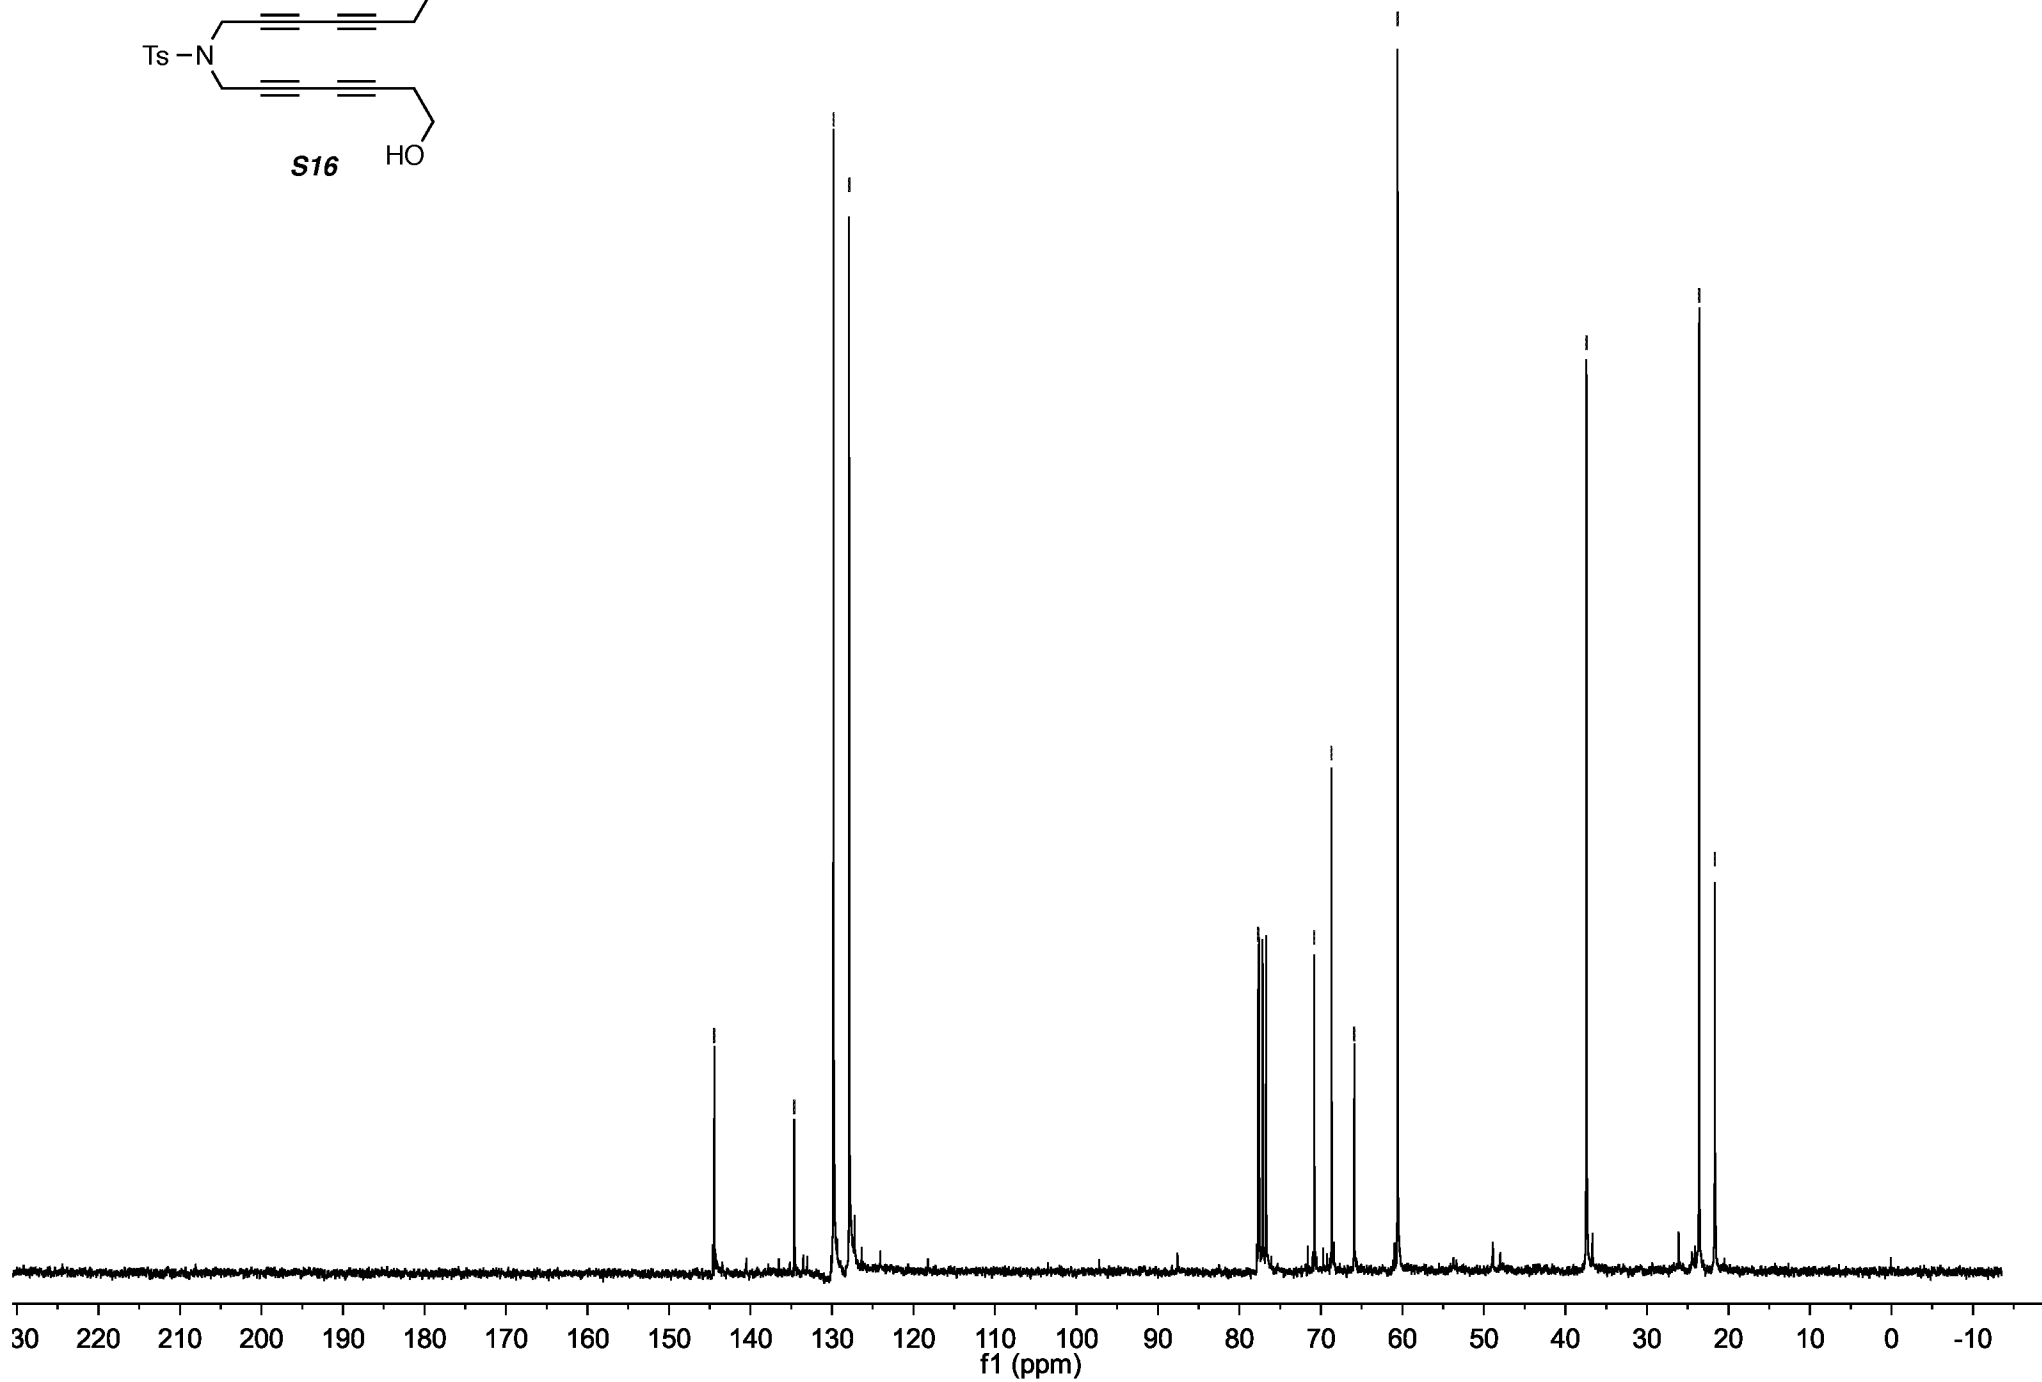



500 MHz, CDCl<sub>3</sub>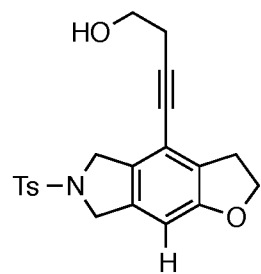**S17**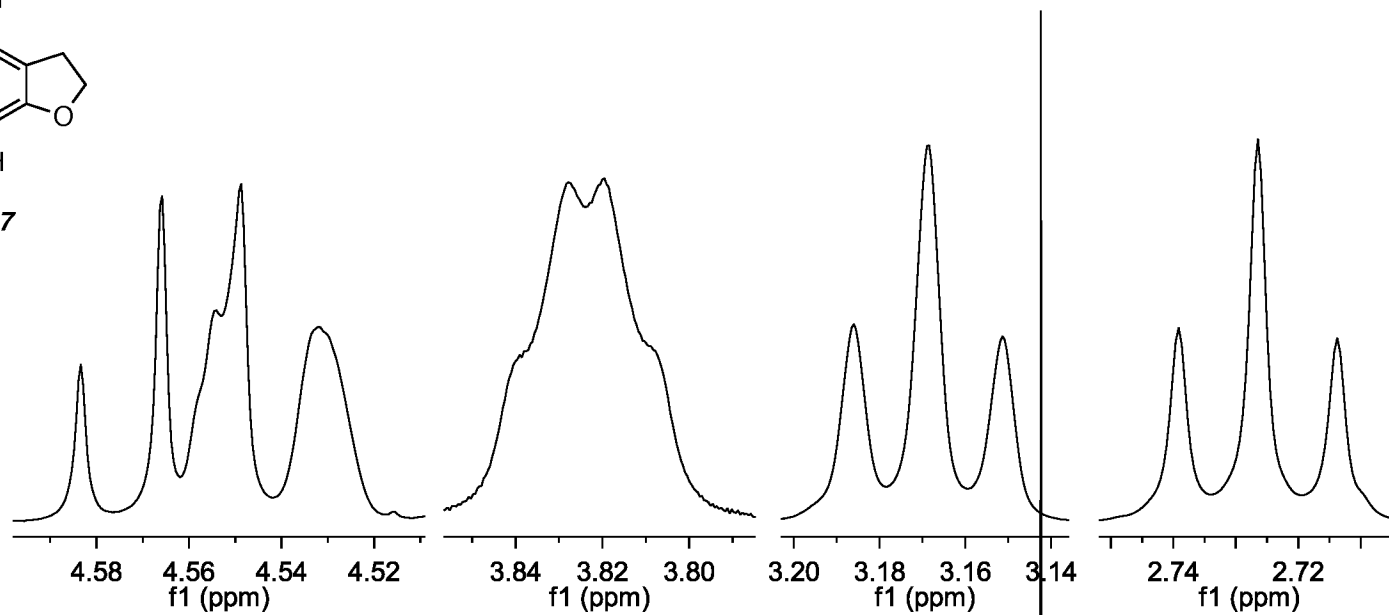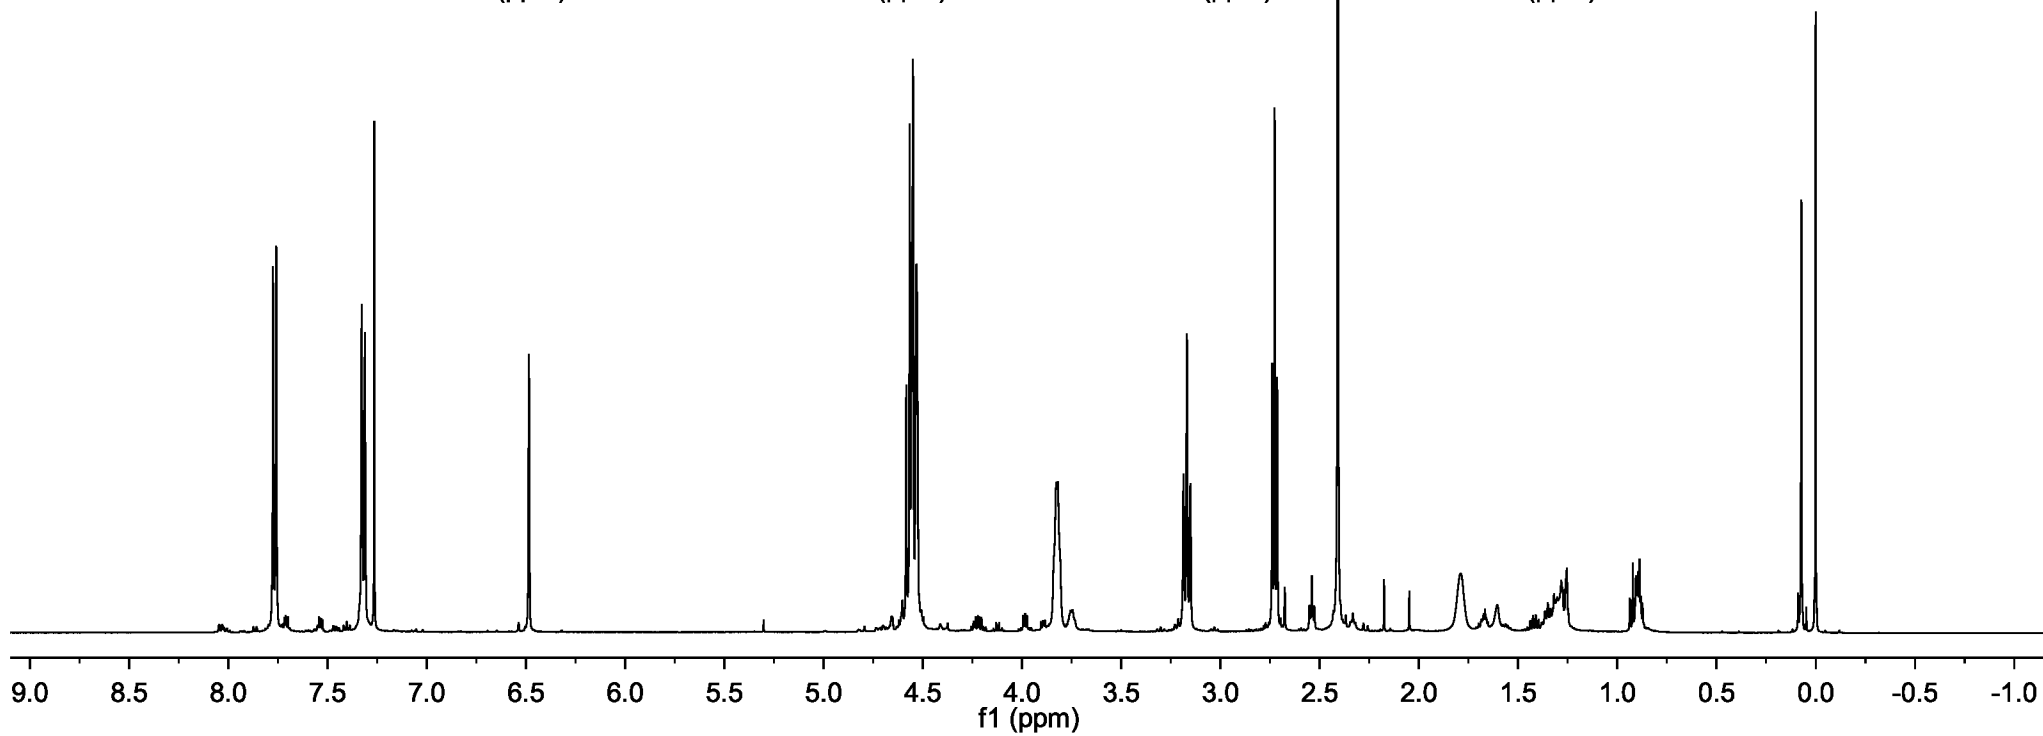



125 MHz, acetone- $d_6$ 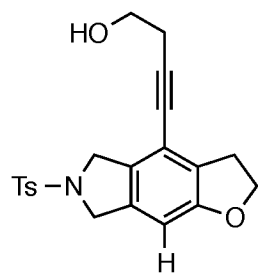**S17**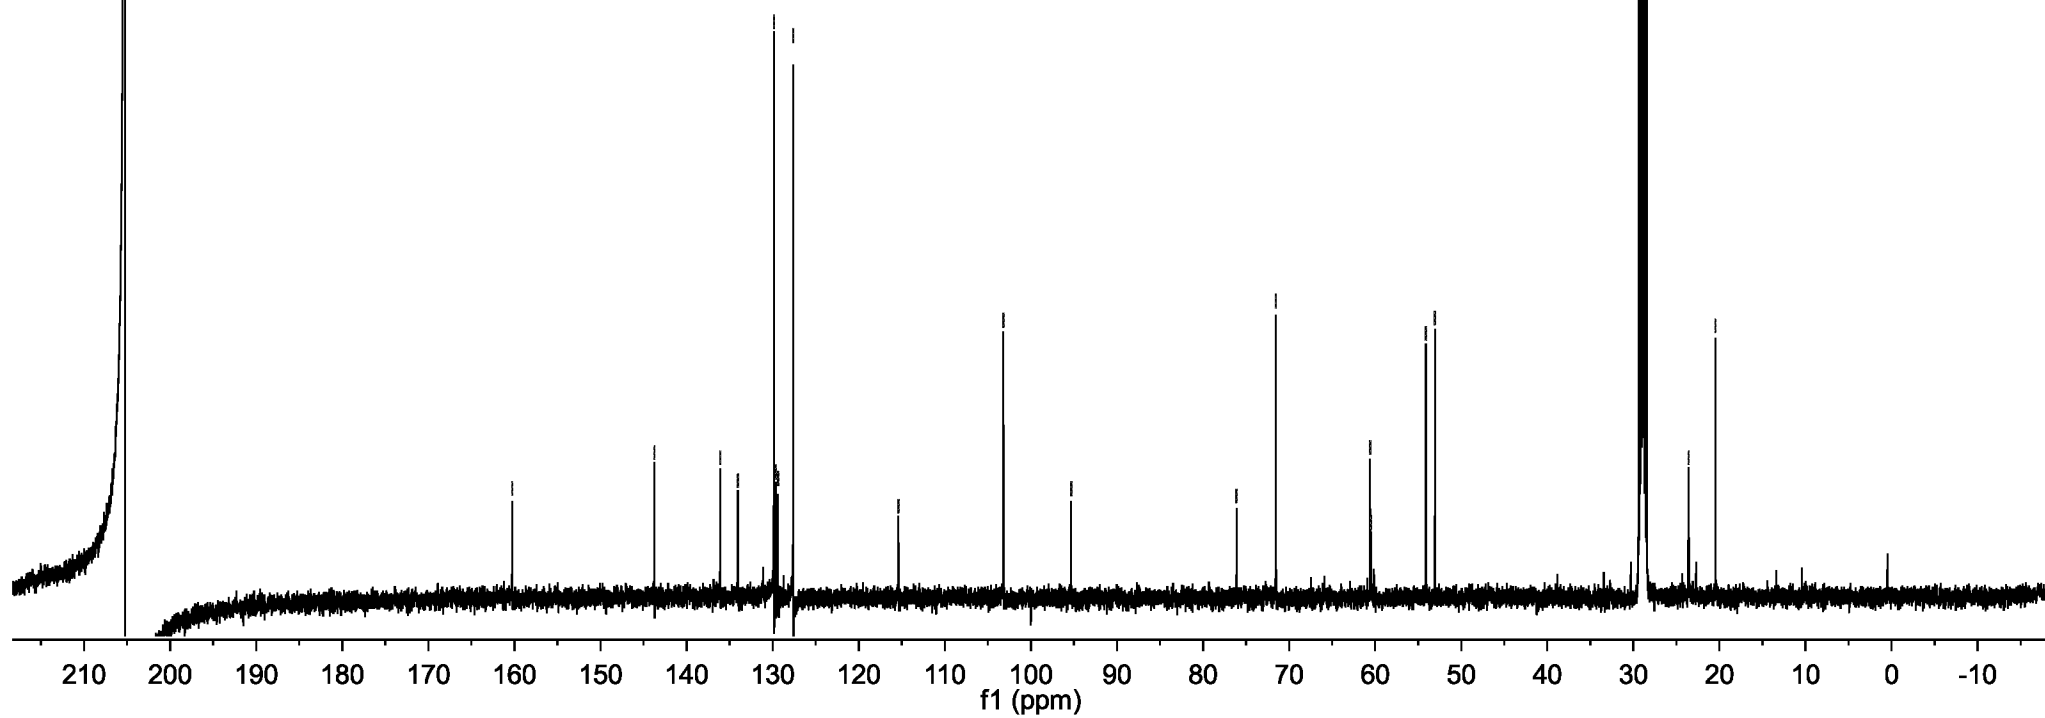

500 MHz, CDCl<sub>3</sub>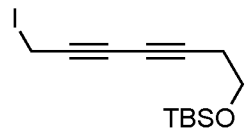**S18**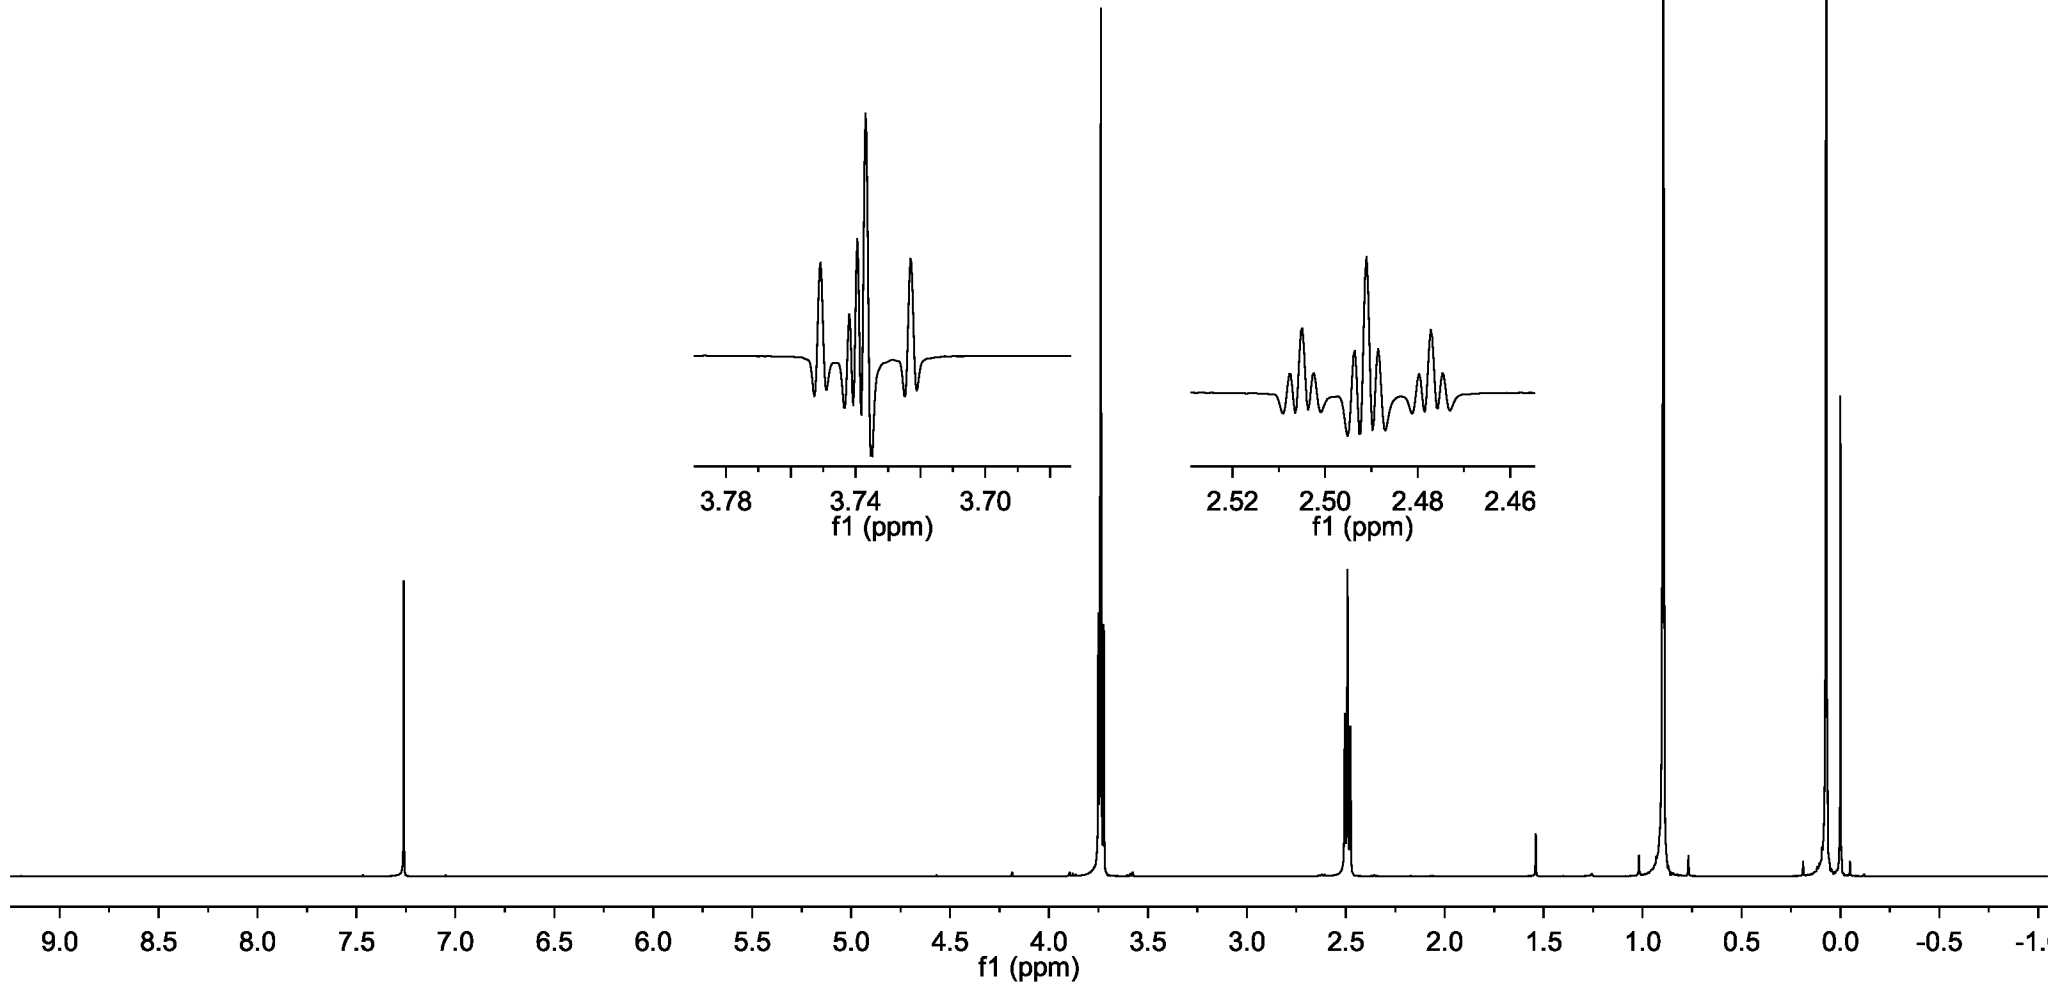

125 MHz, C<sub>6</sub>D<sub>6</sub>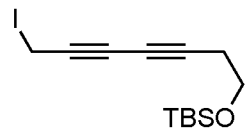**S18**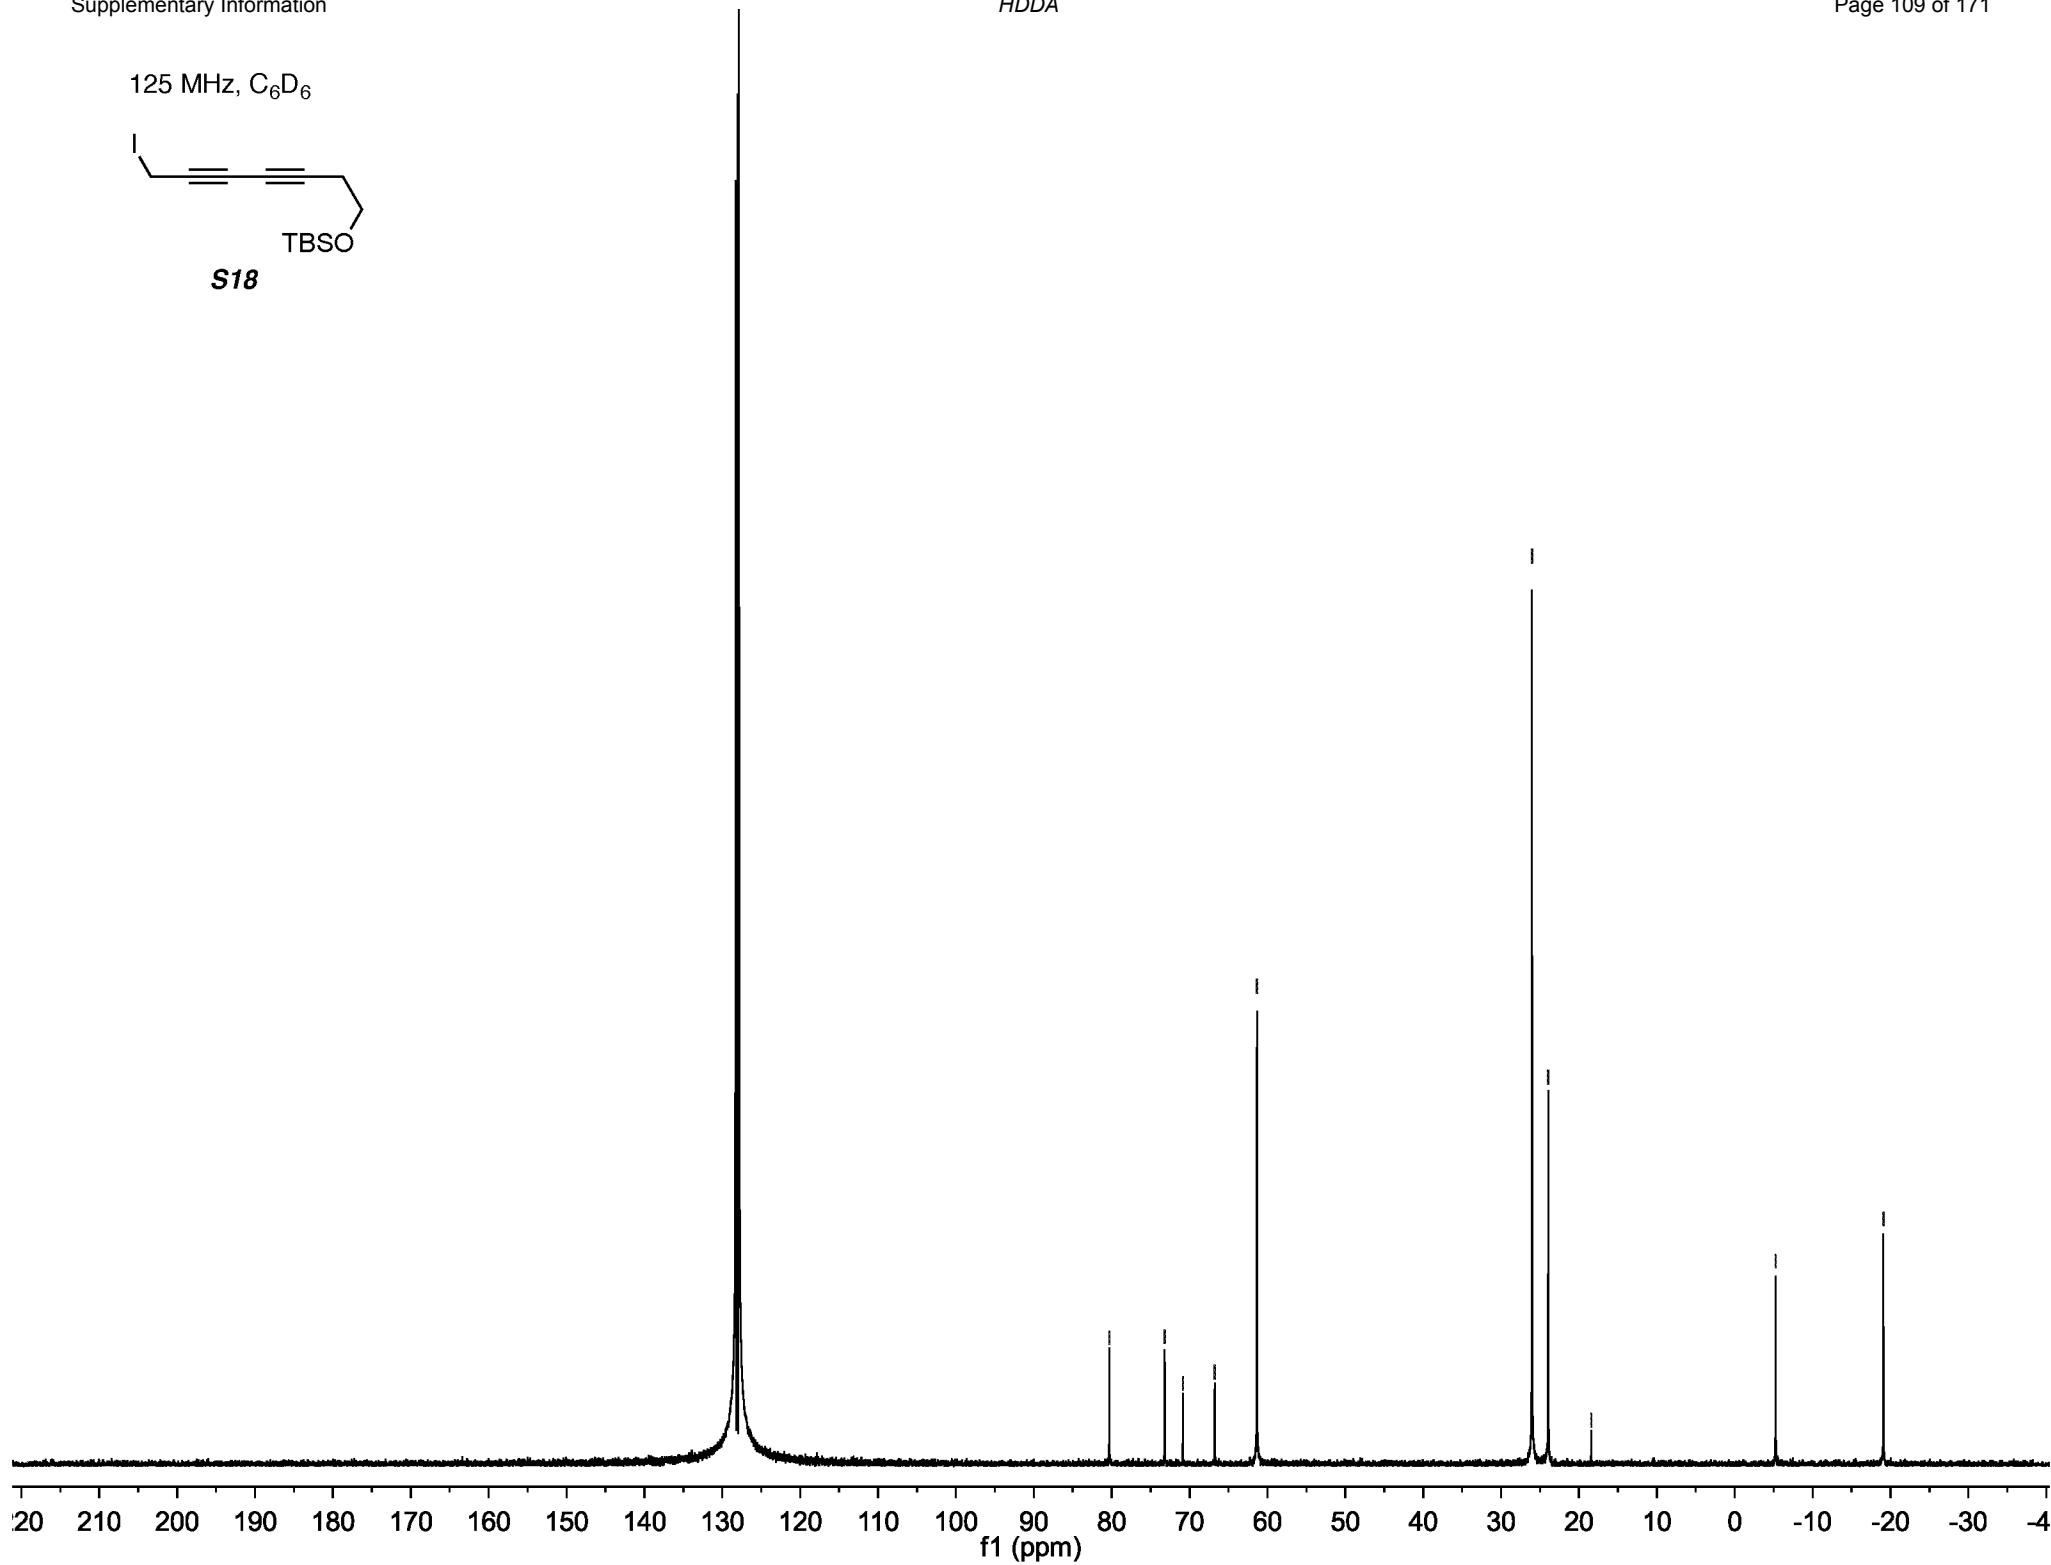

500 MHz, CDCl<sub>3</sub>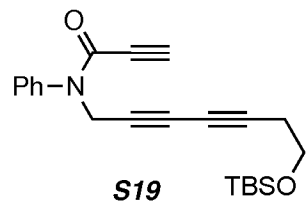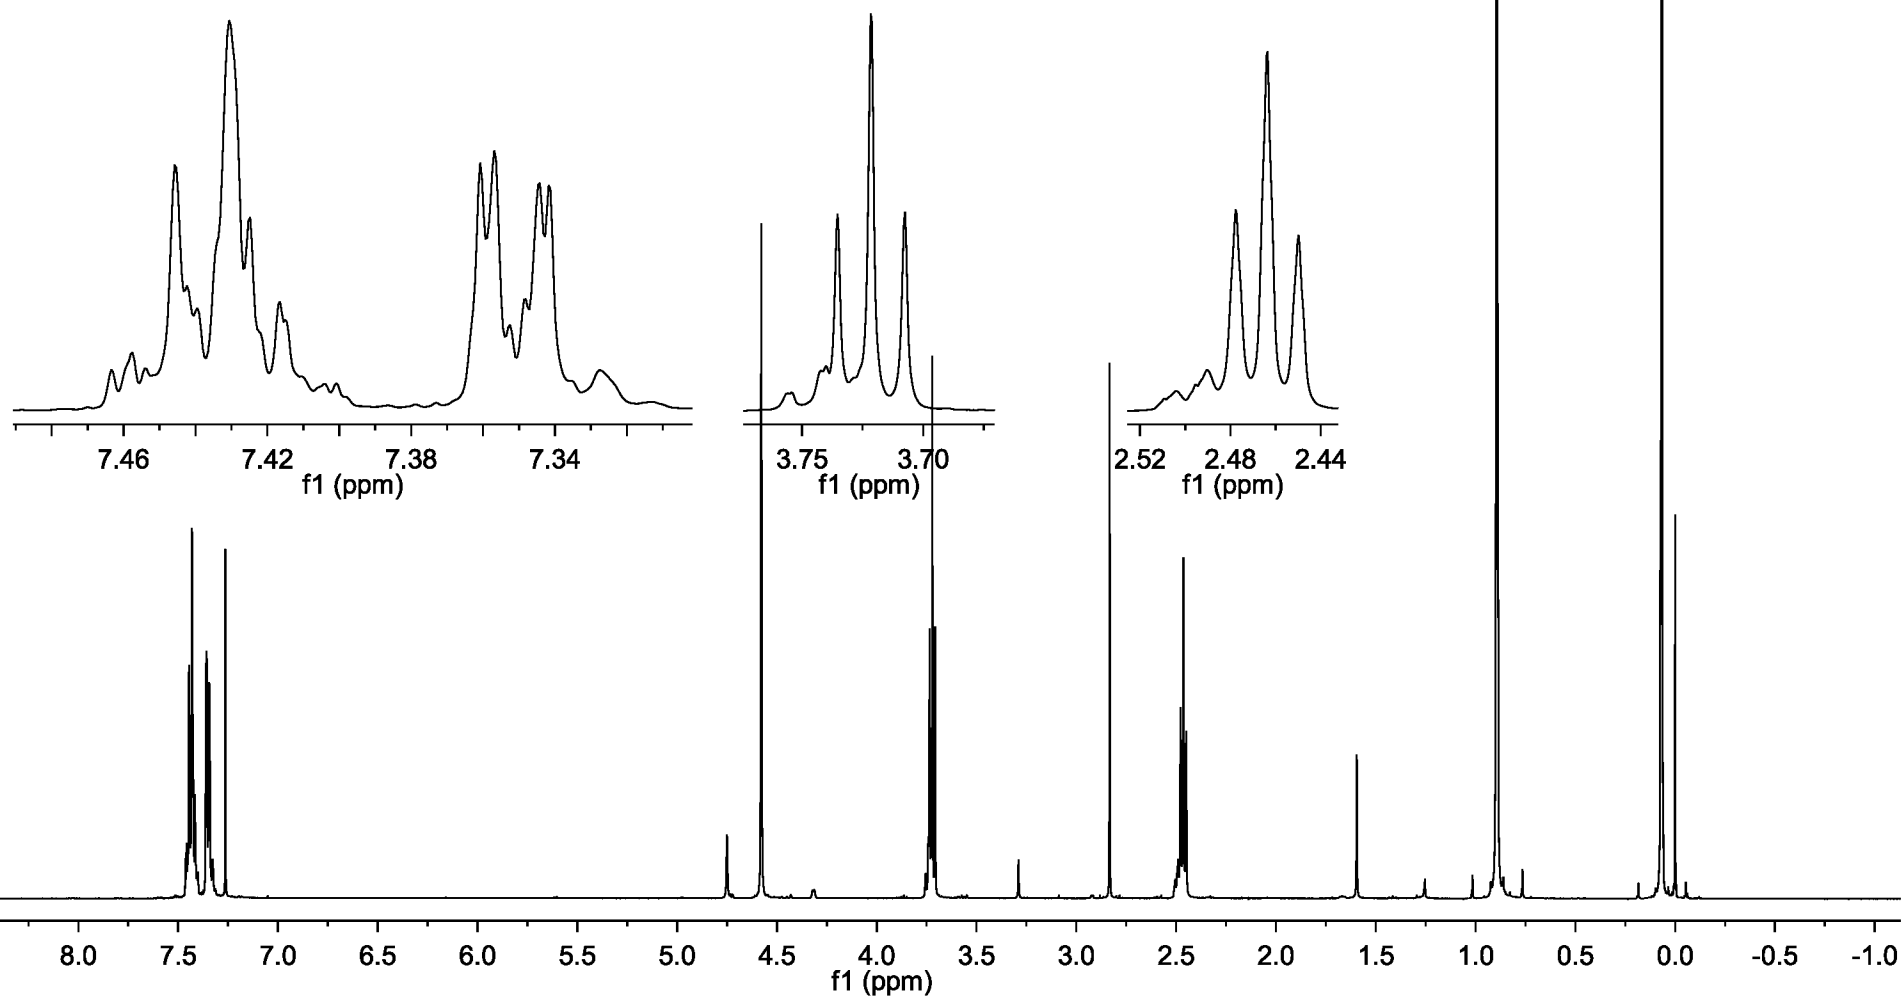

125 MHz, CDCl<sub>3</sub>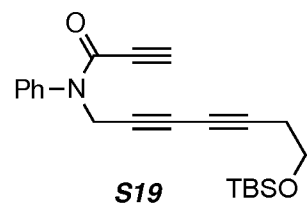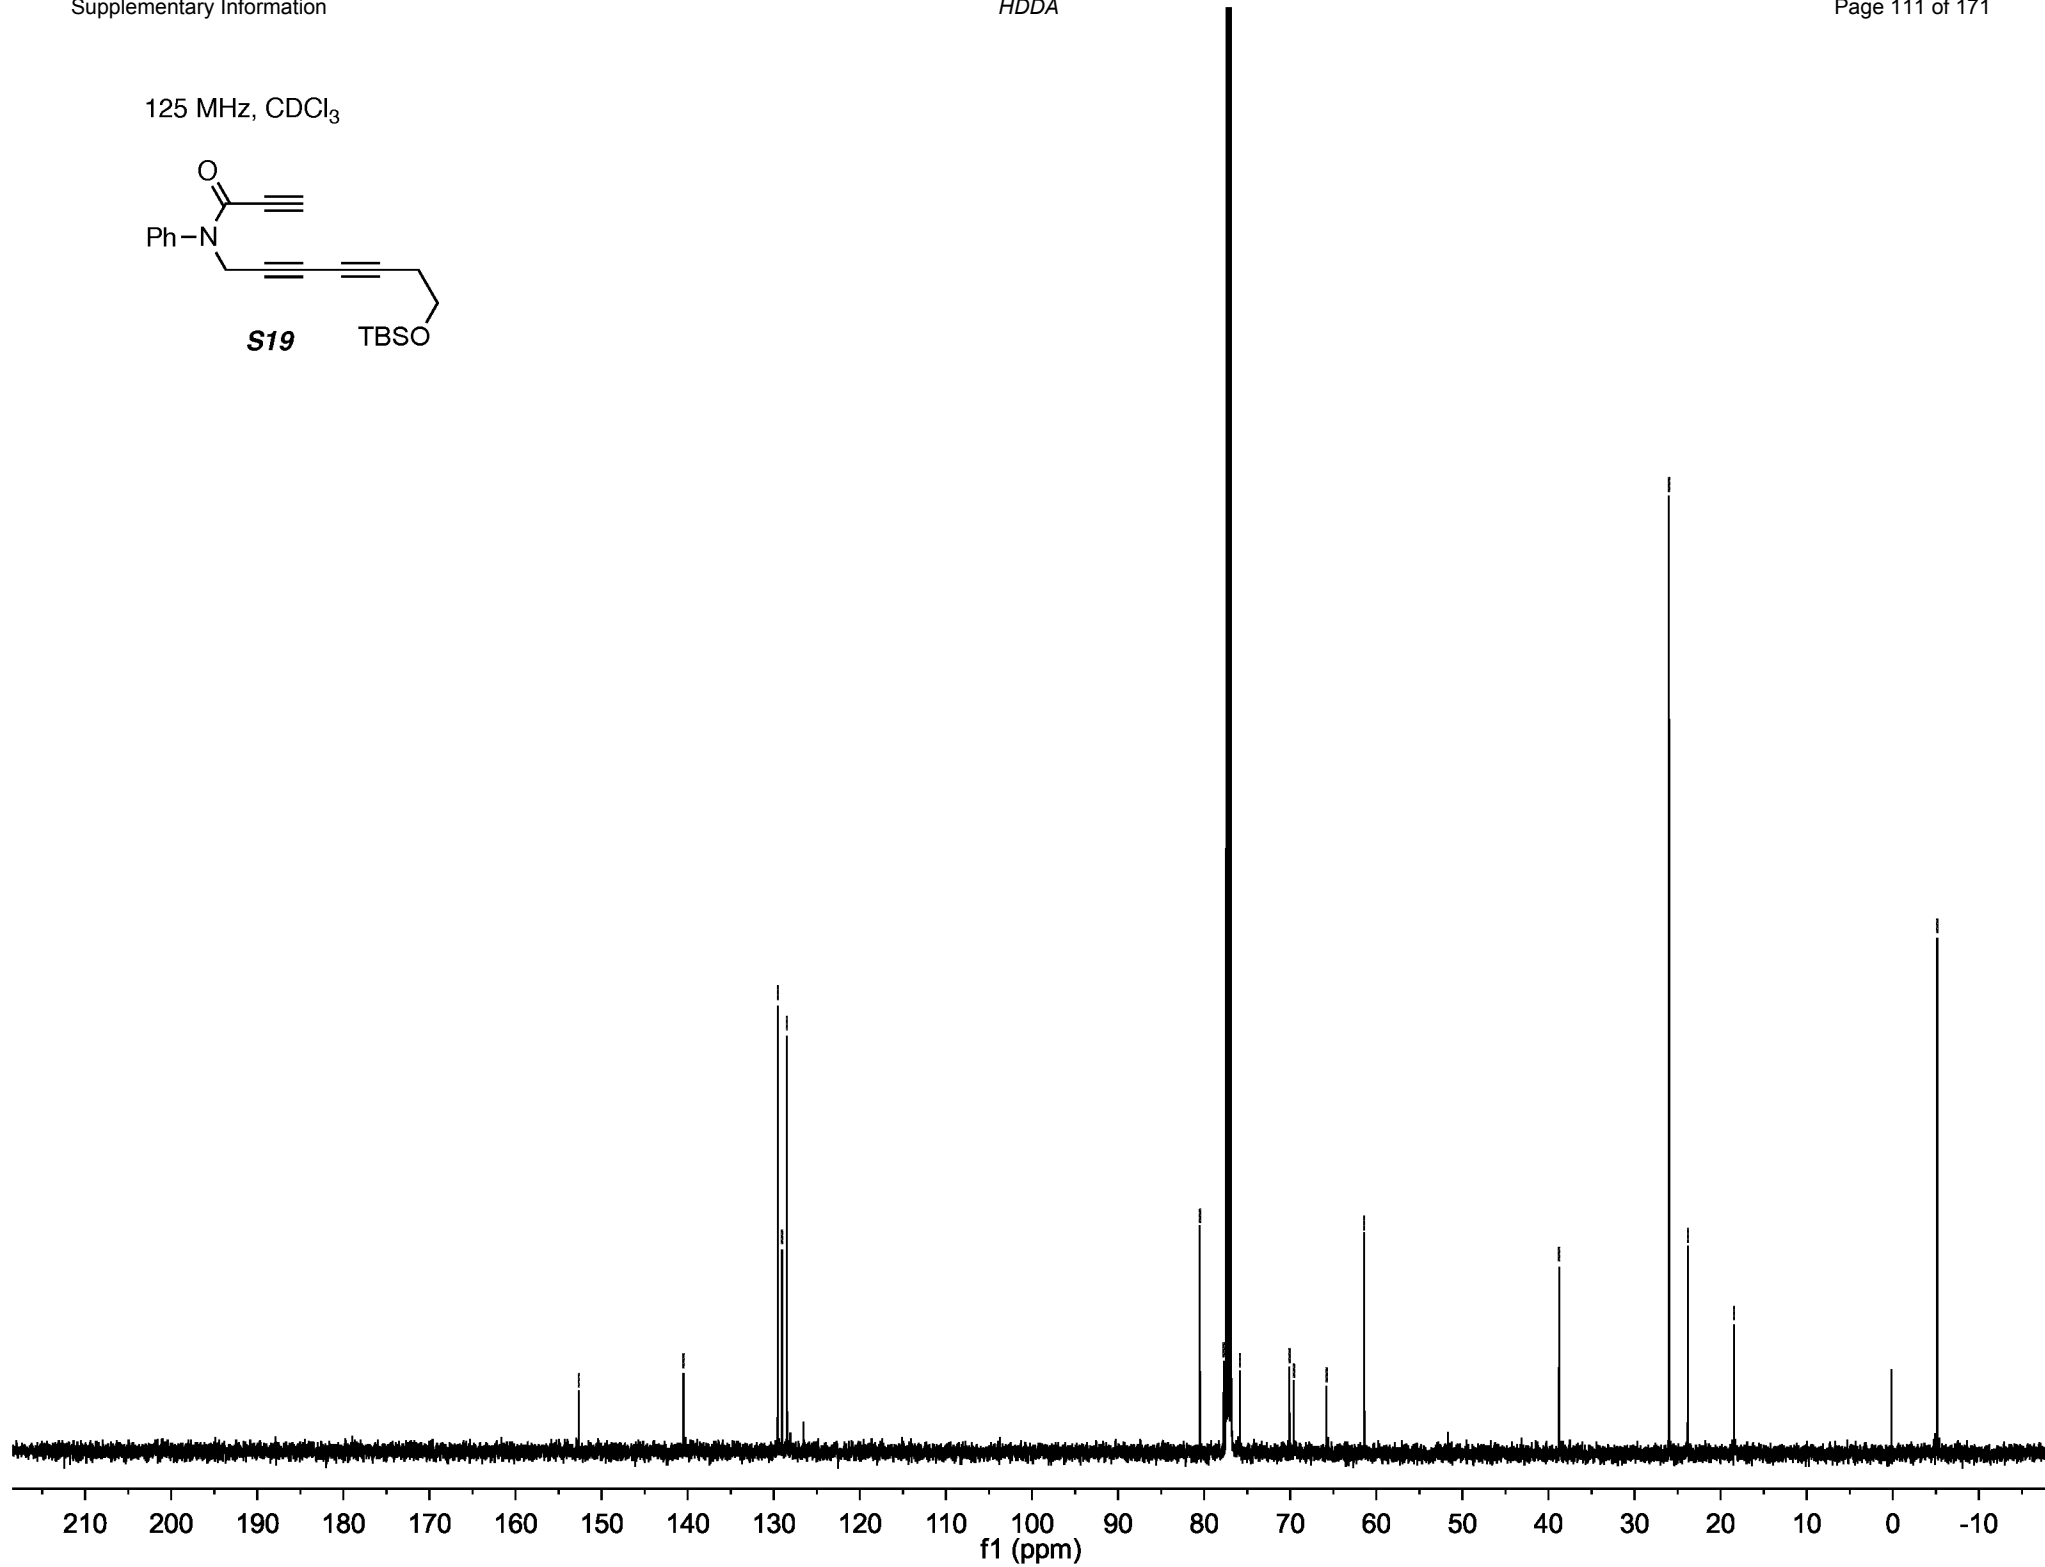

500 MHz, CDCl<sub>3</sub>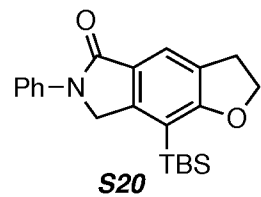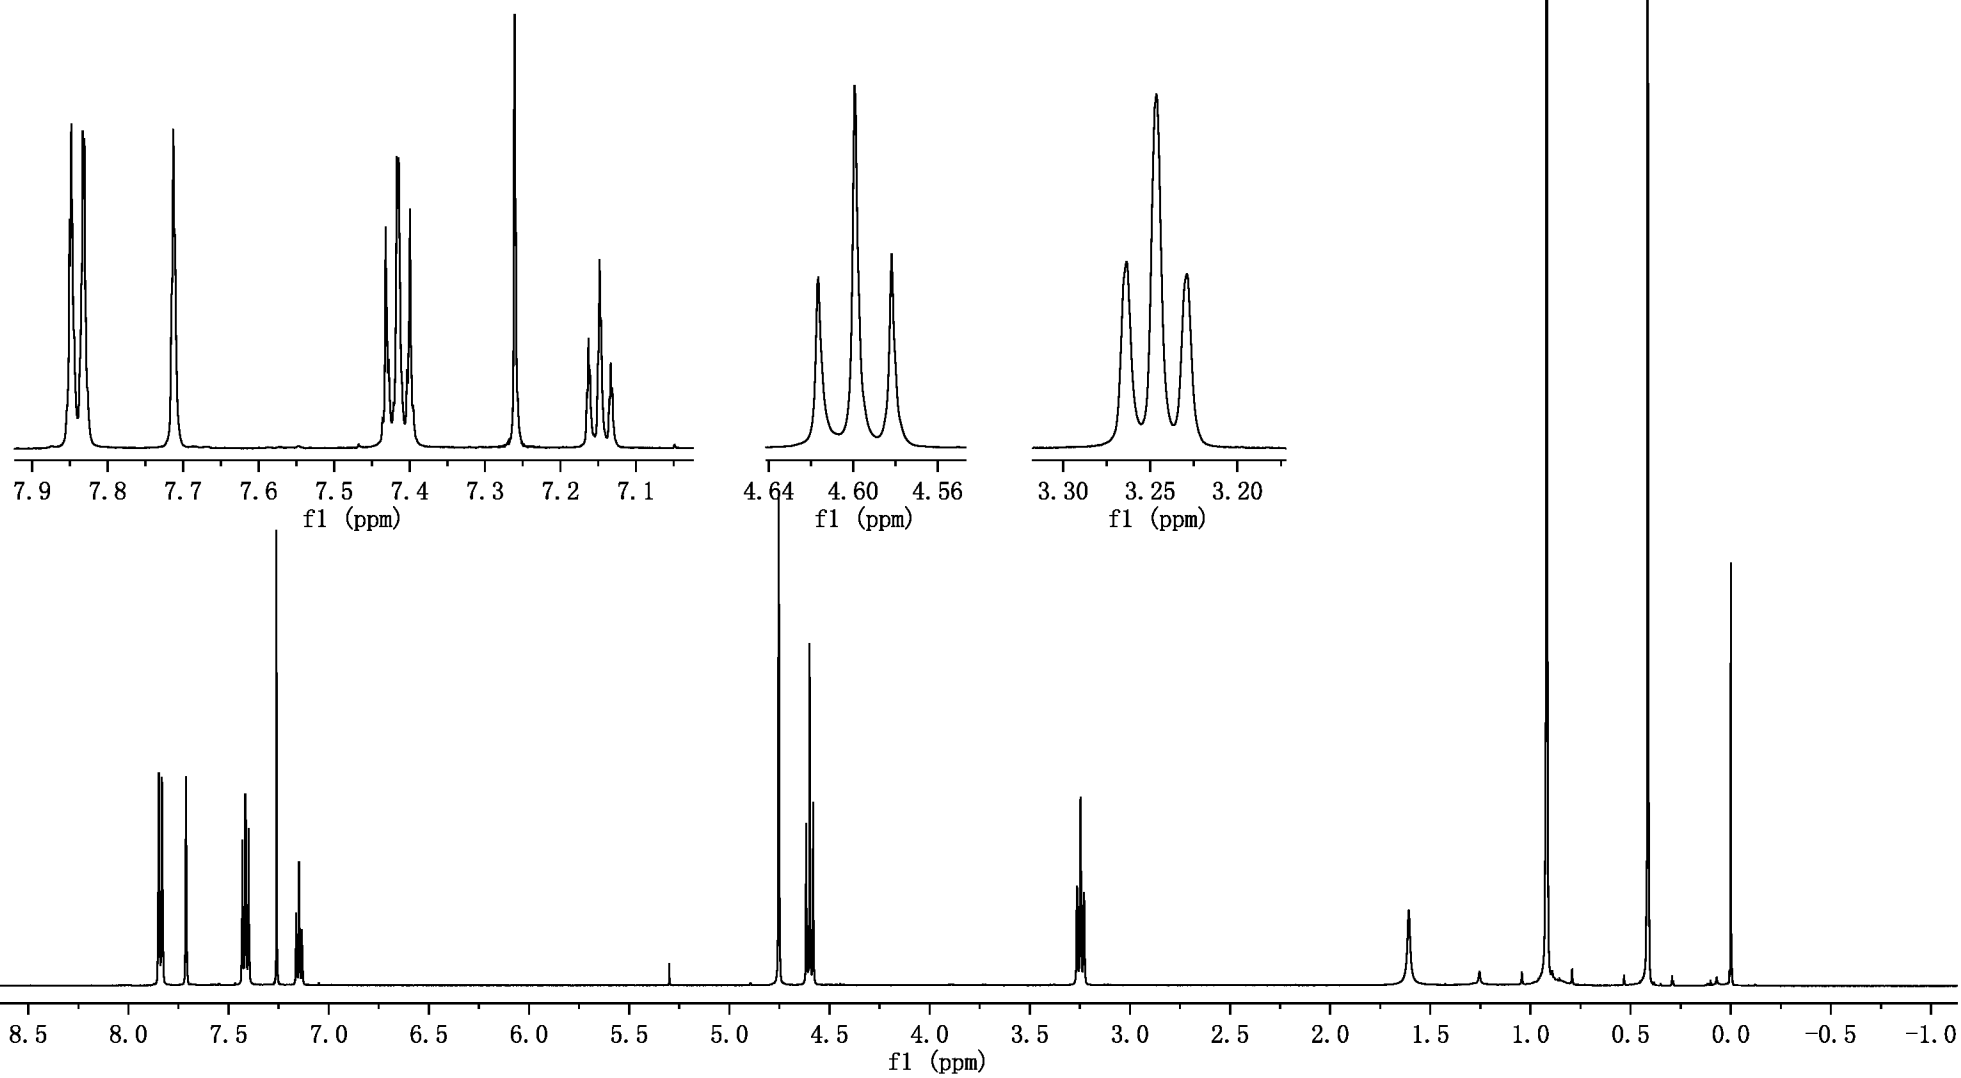



125 MHz, CDCl<sub>3</sub>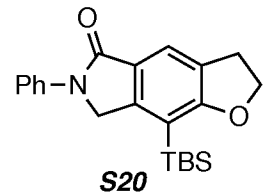**S20**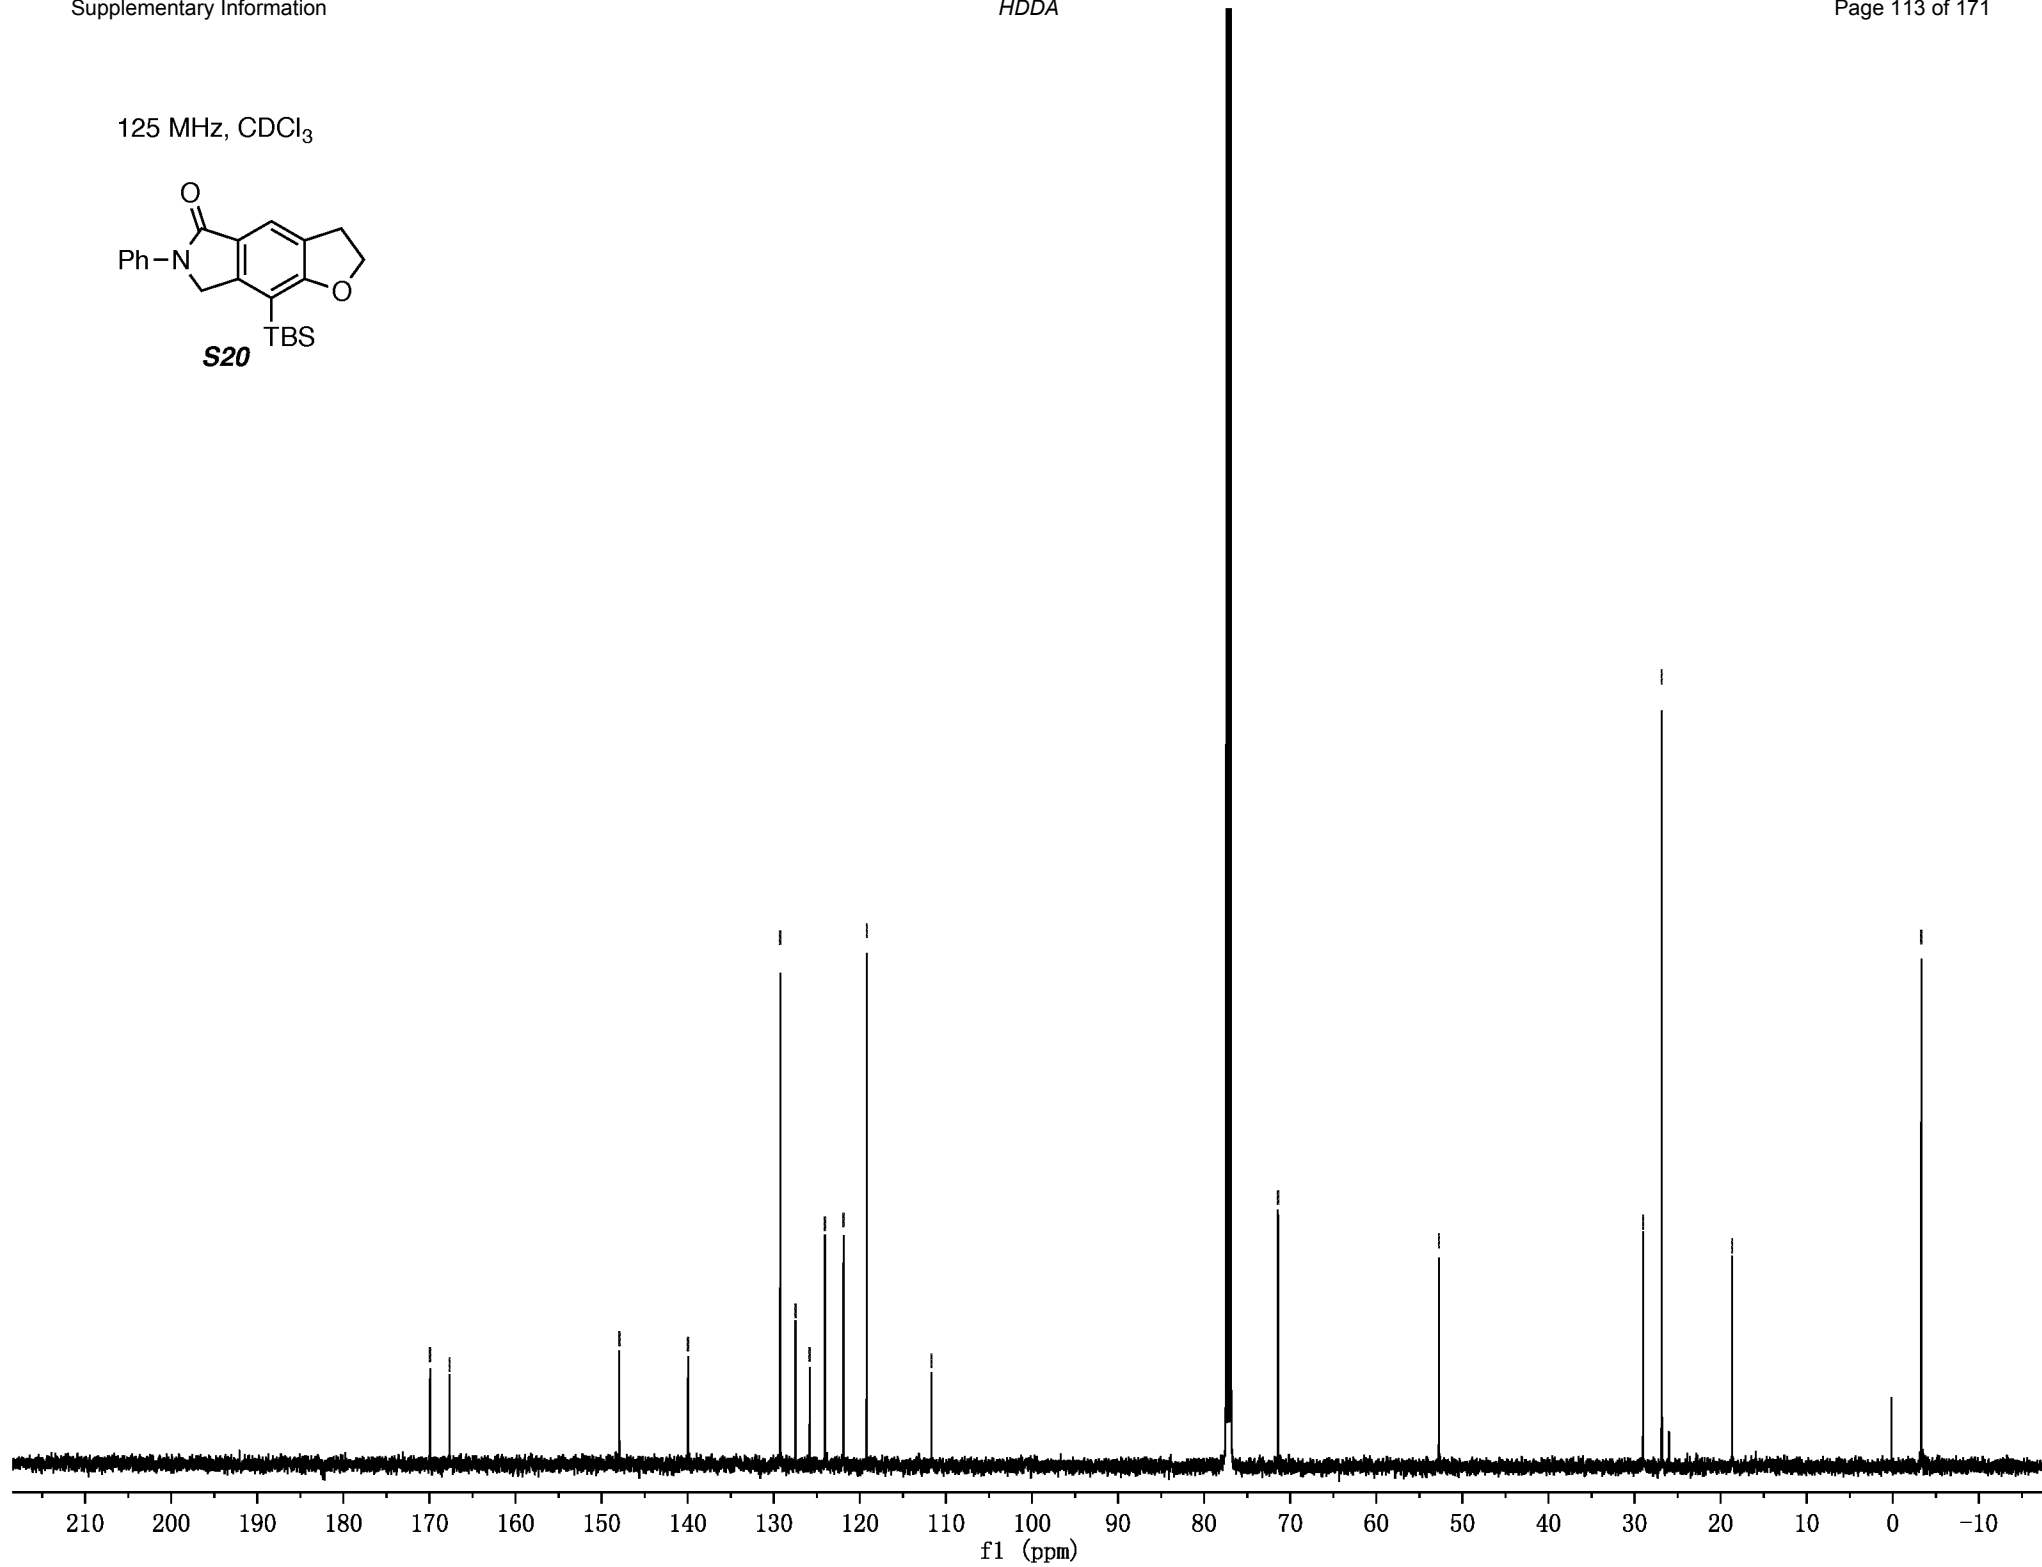

500 MHz, CDCl<sub>3</sub>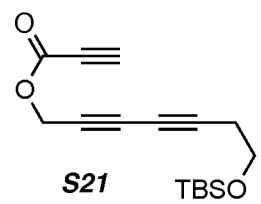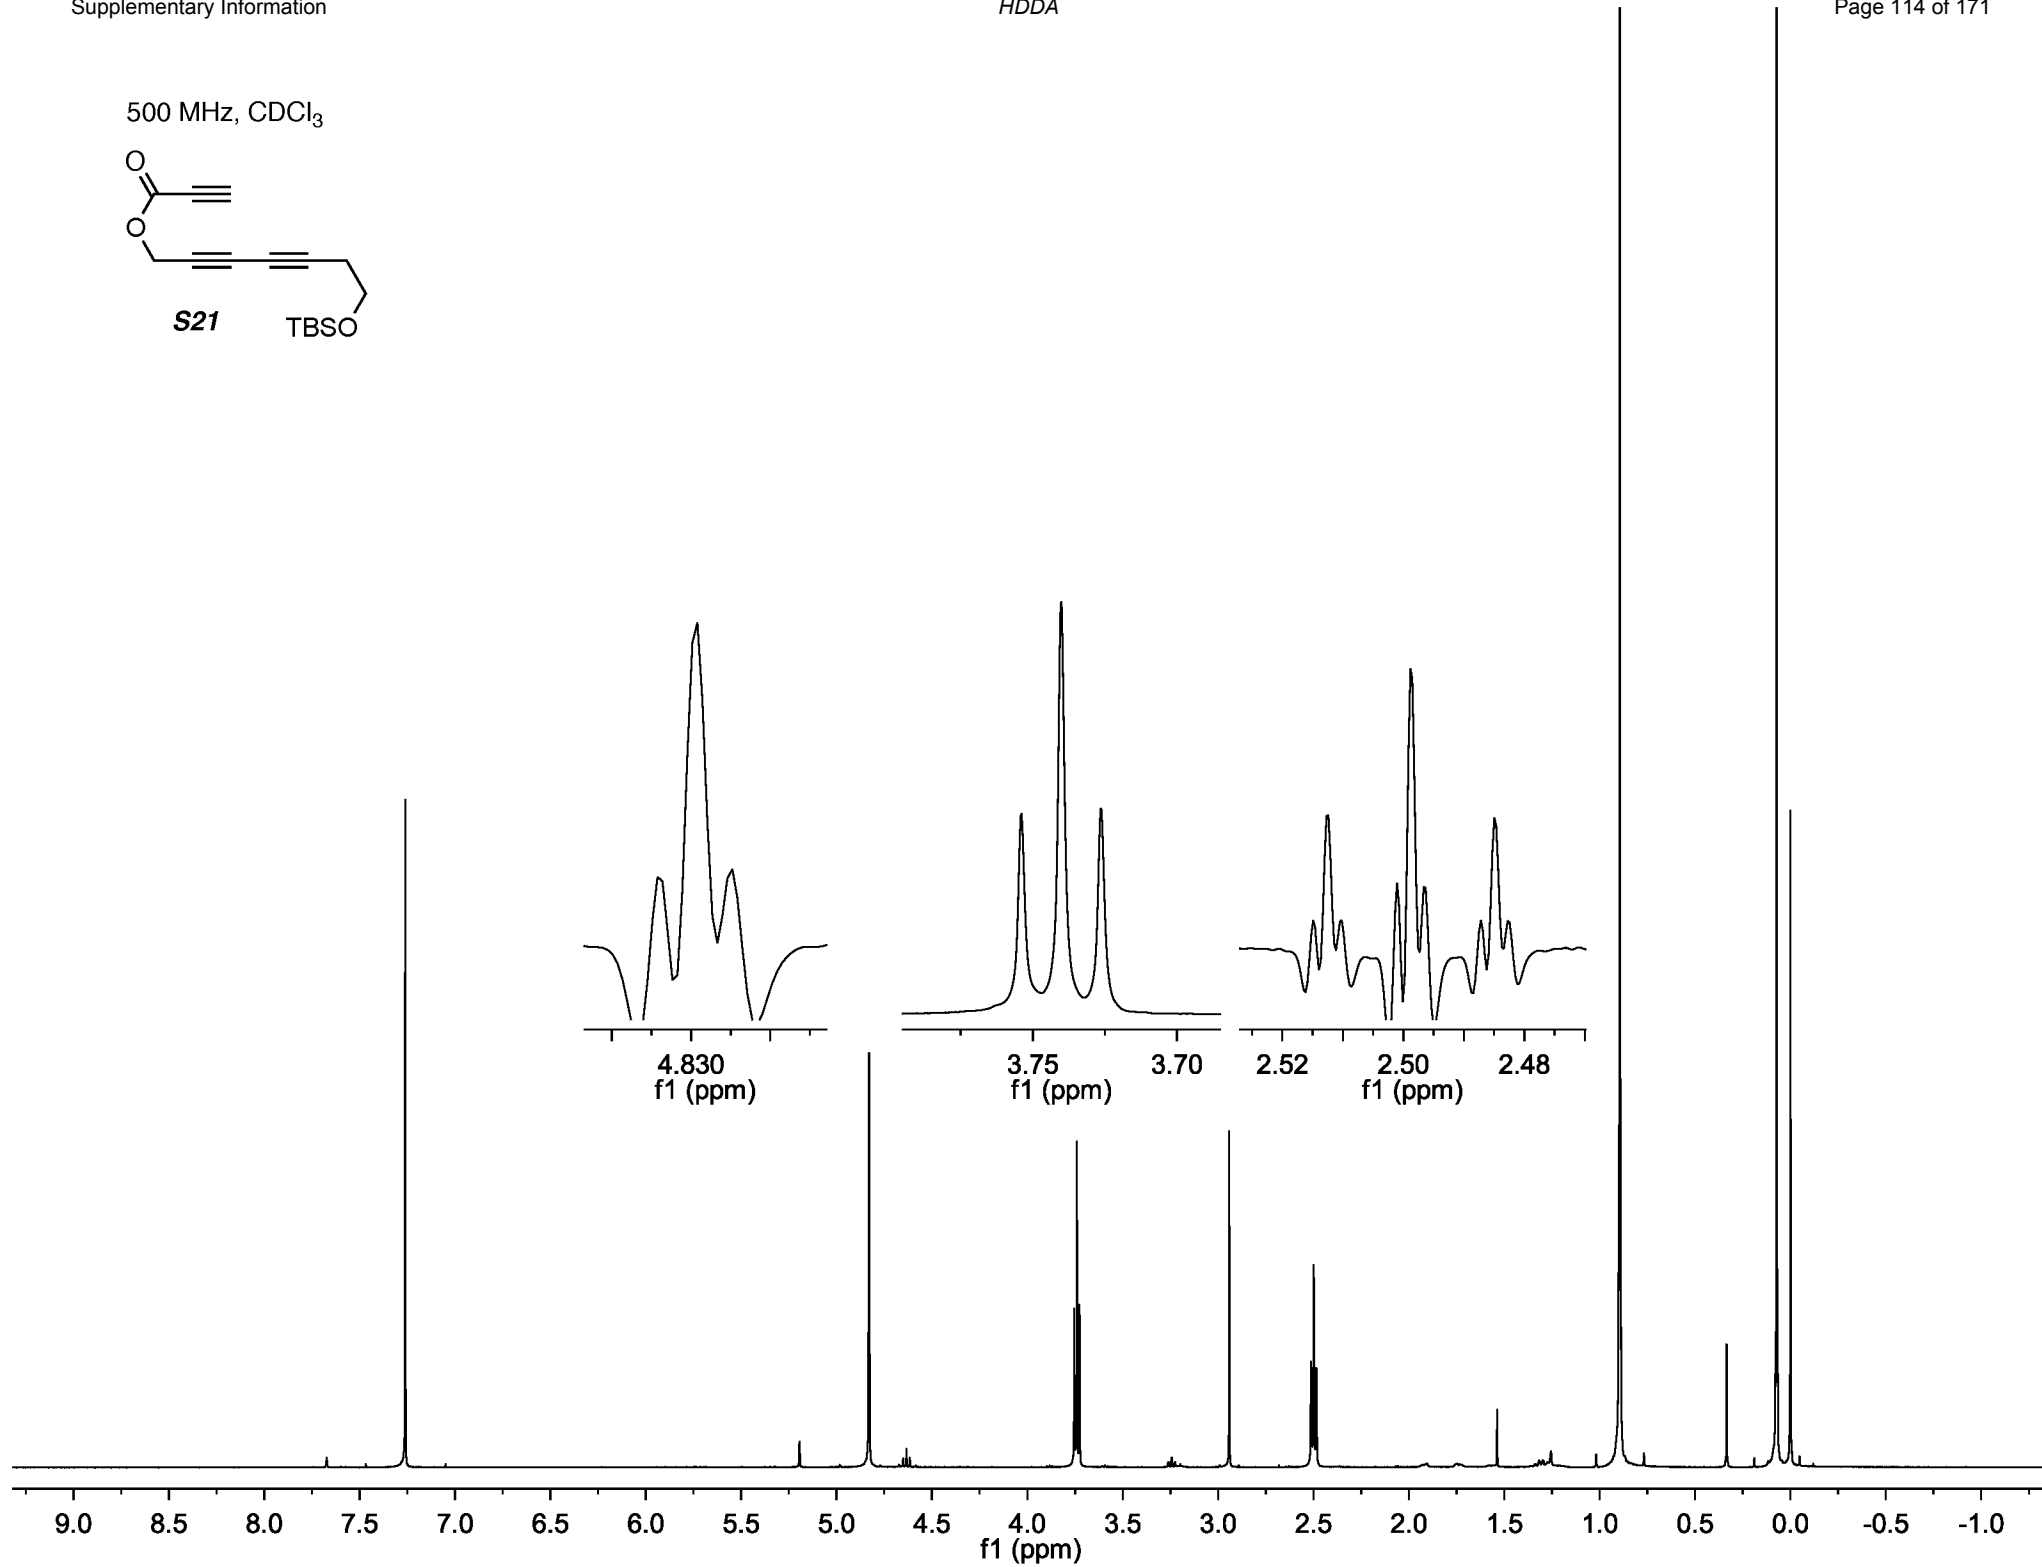

125 MHz, CDCl<sub>3</sub>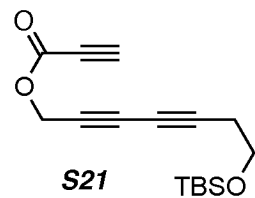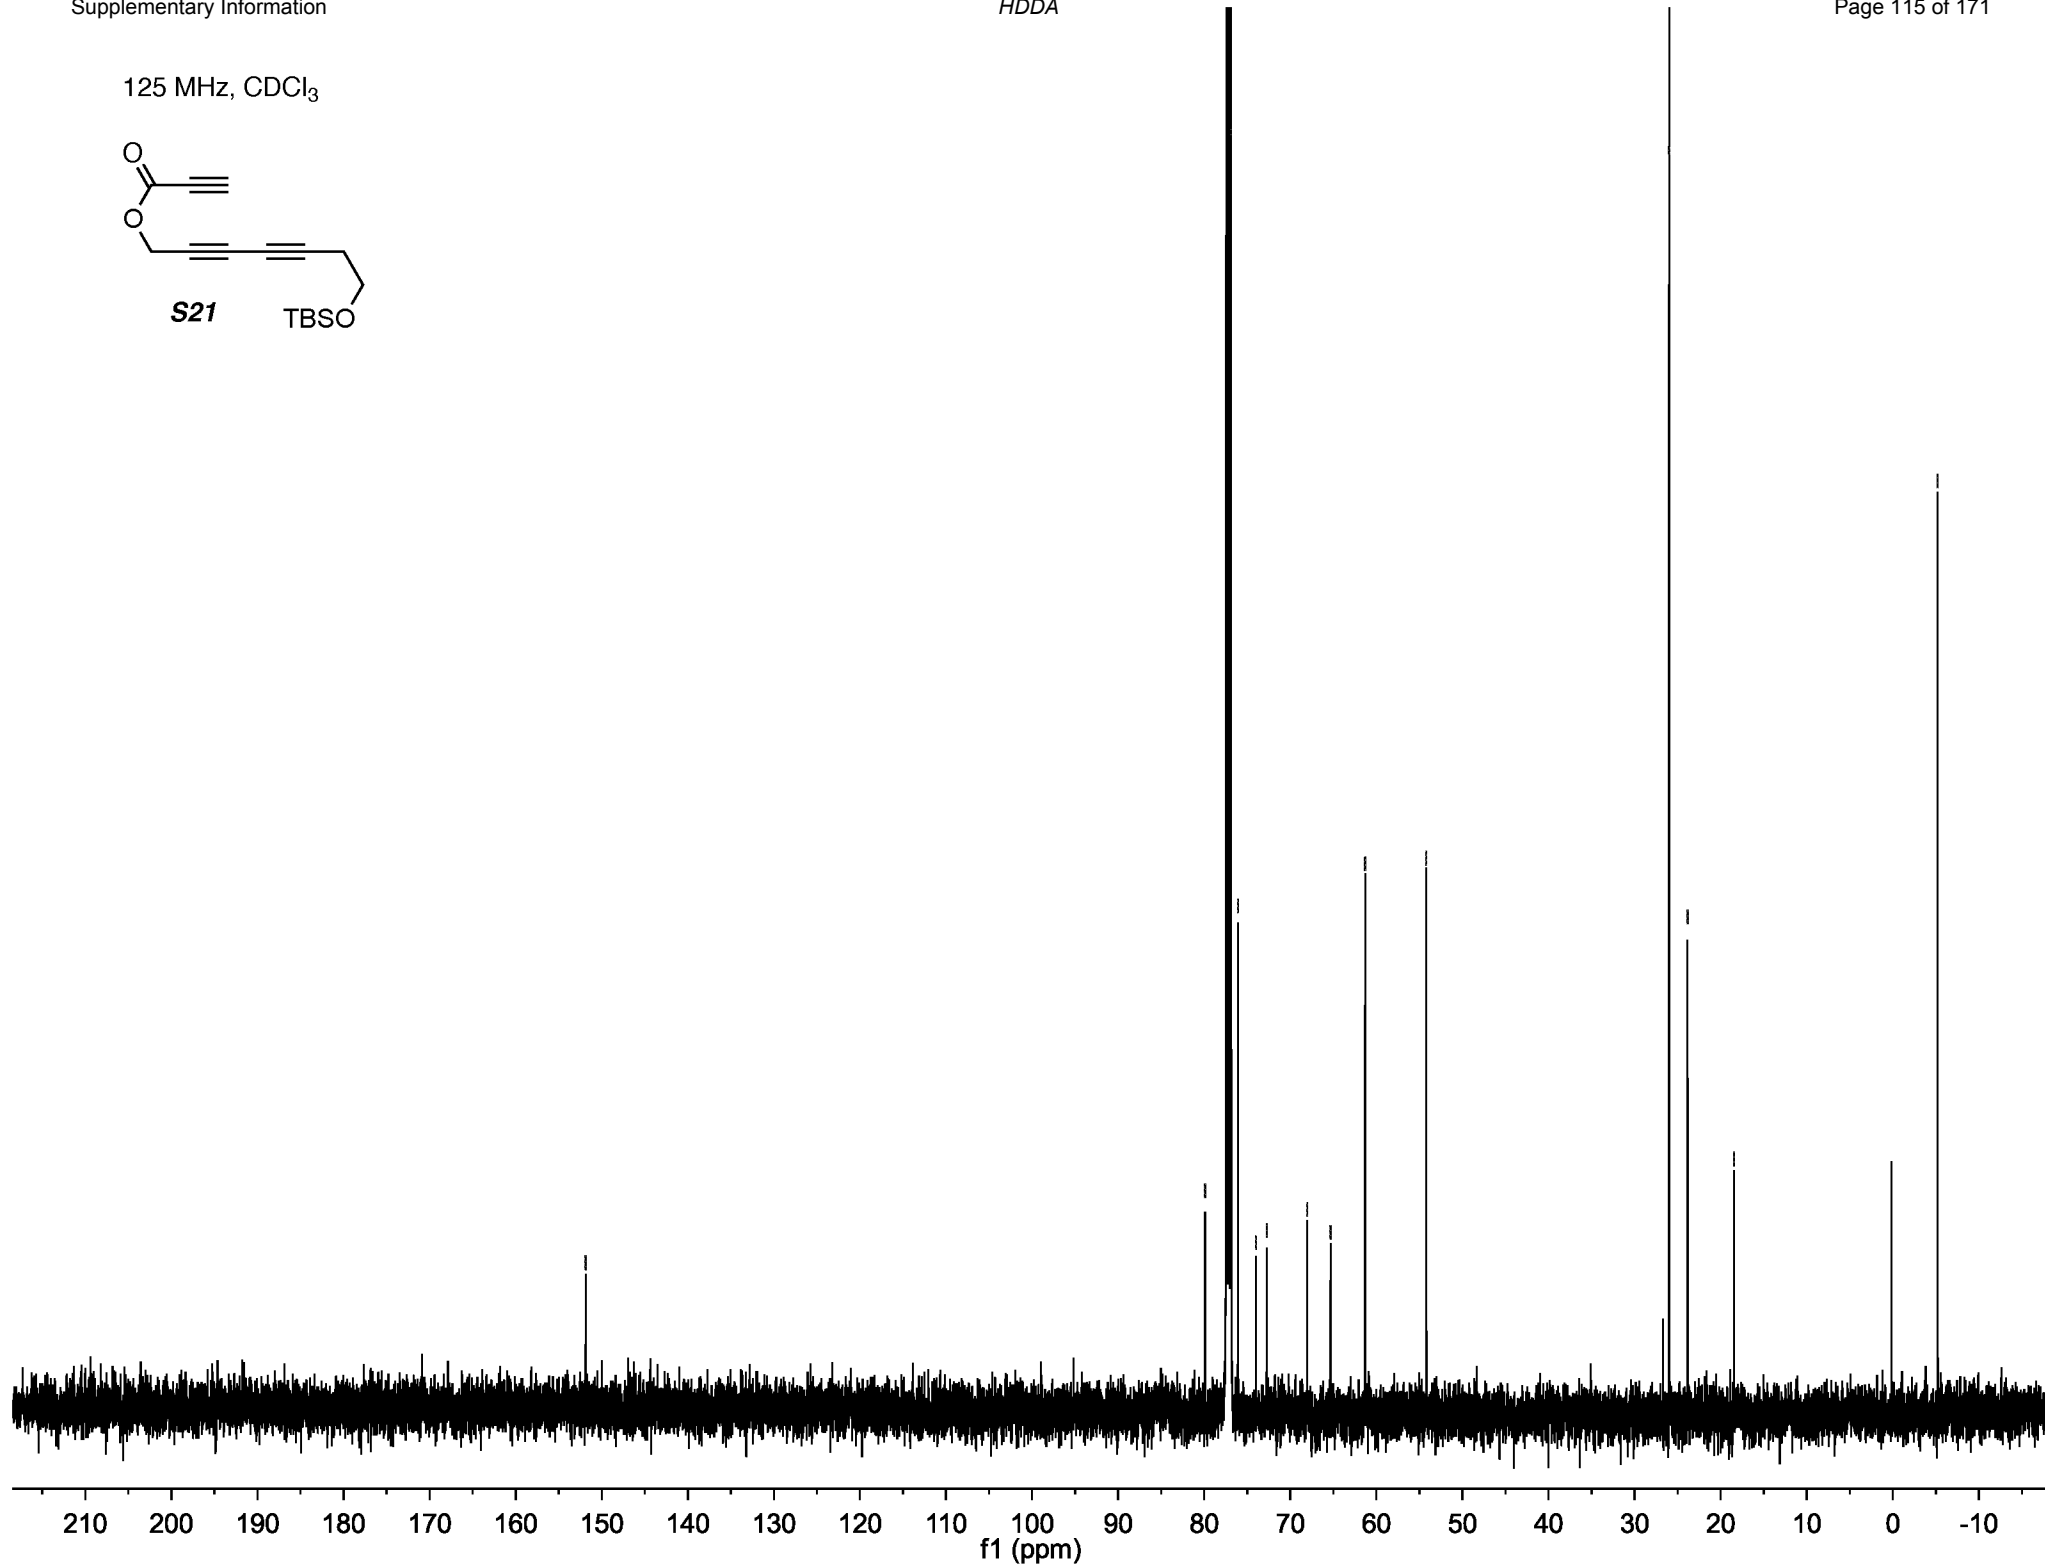

500 MHz, CDCl<sub>3</sub>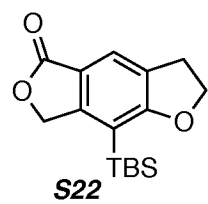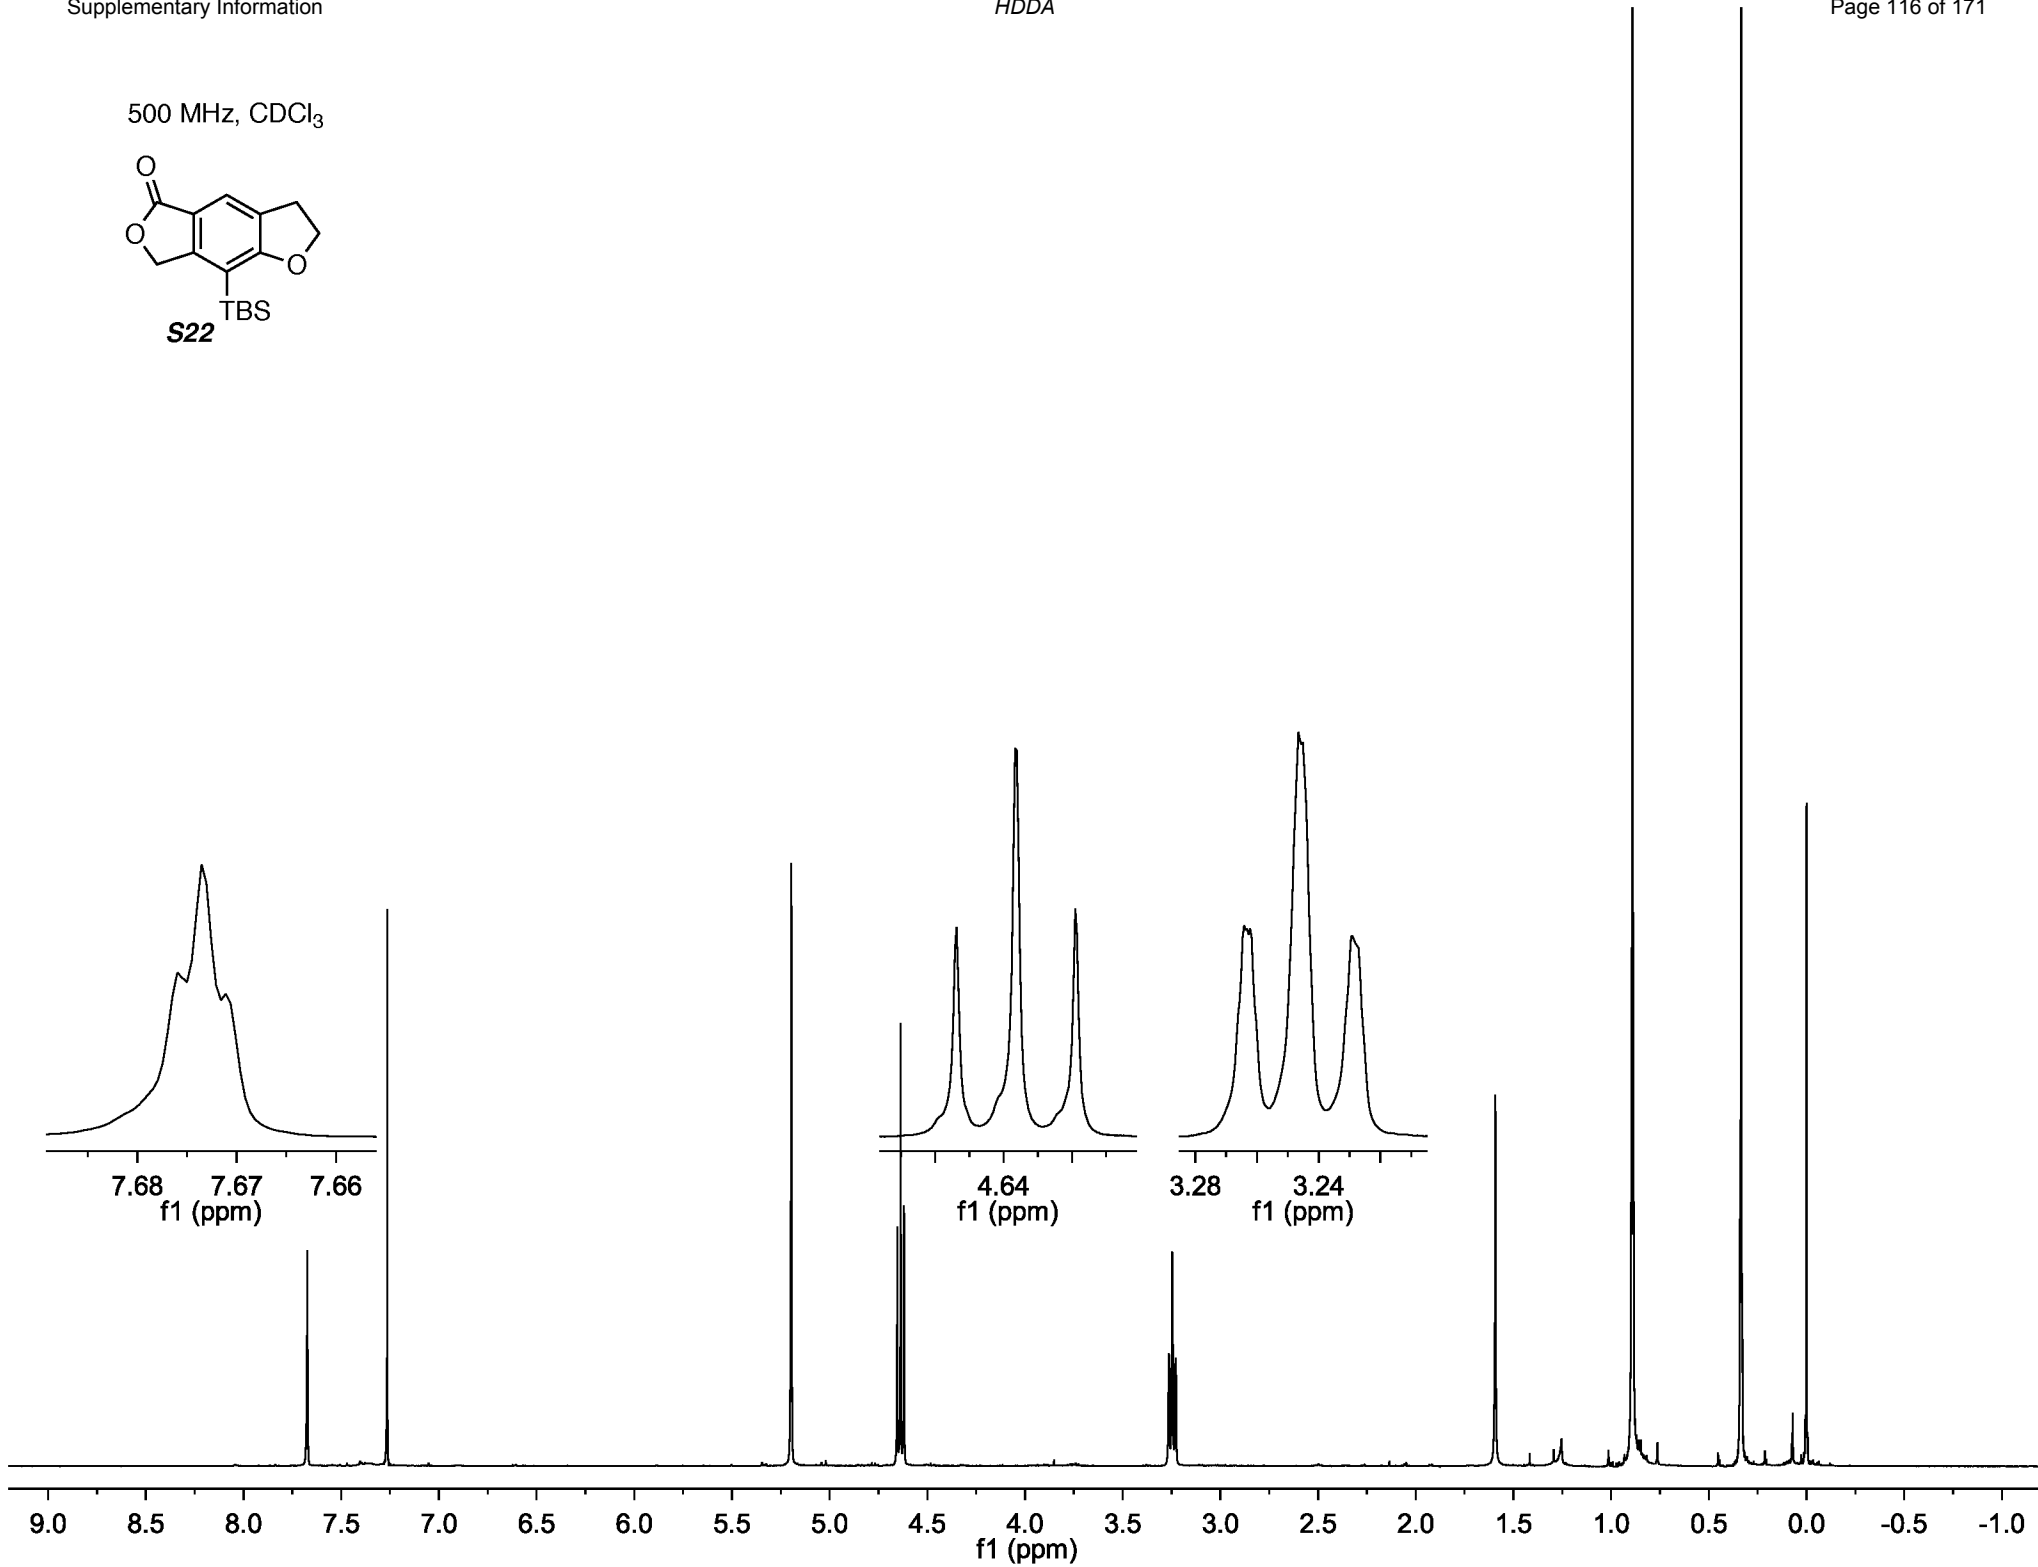



500 MHz, CDCl<sub>3</sub>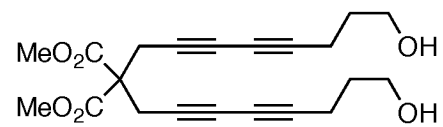**S23**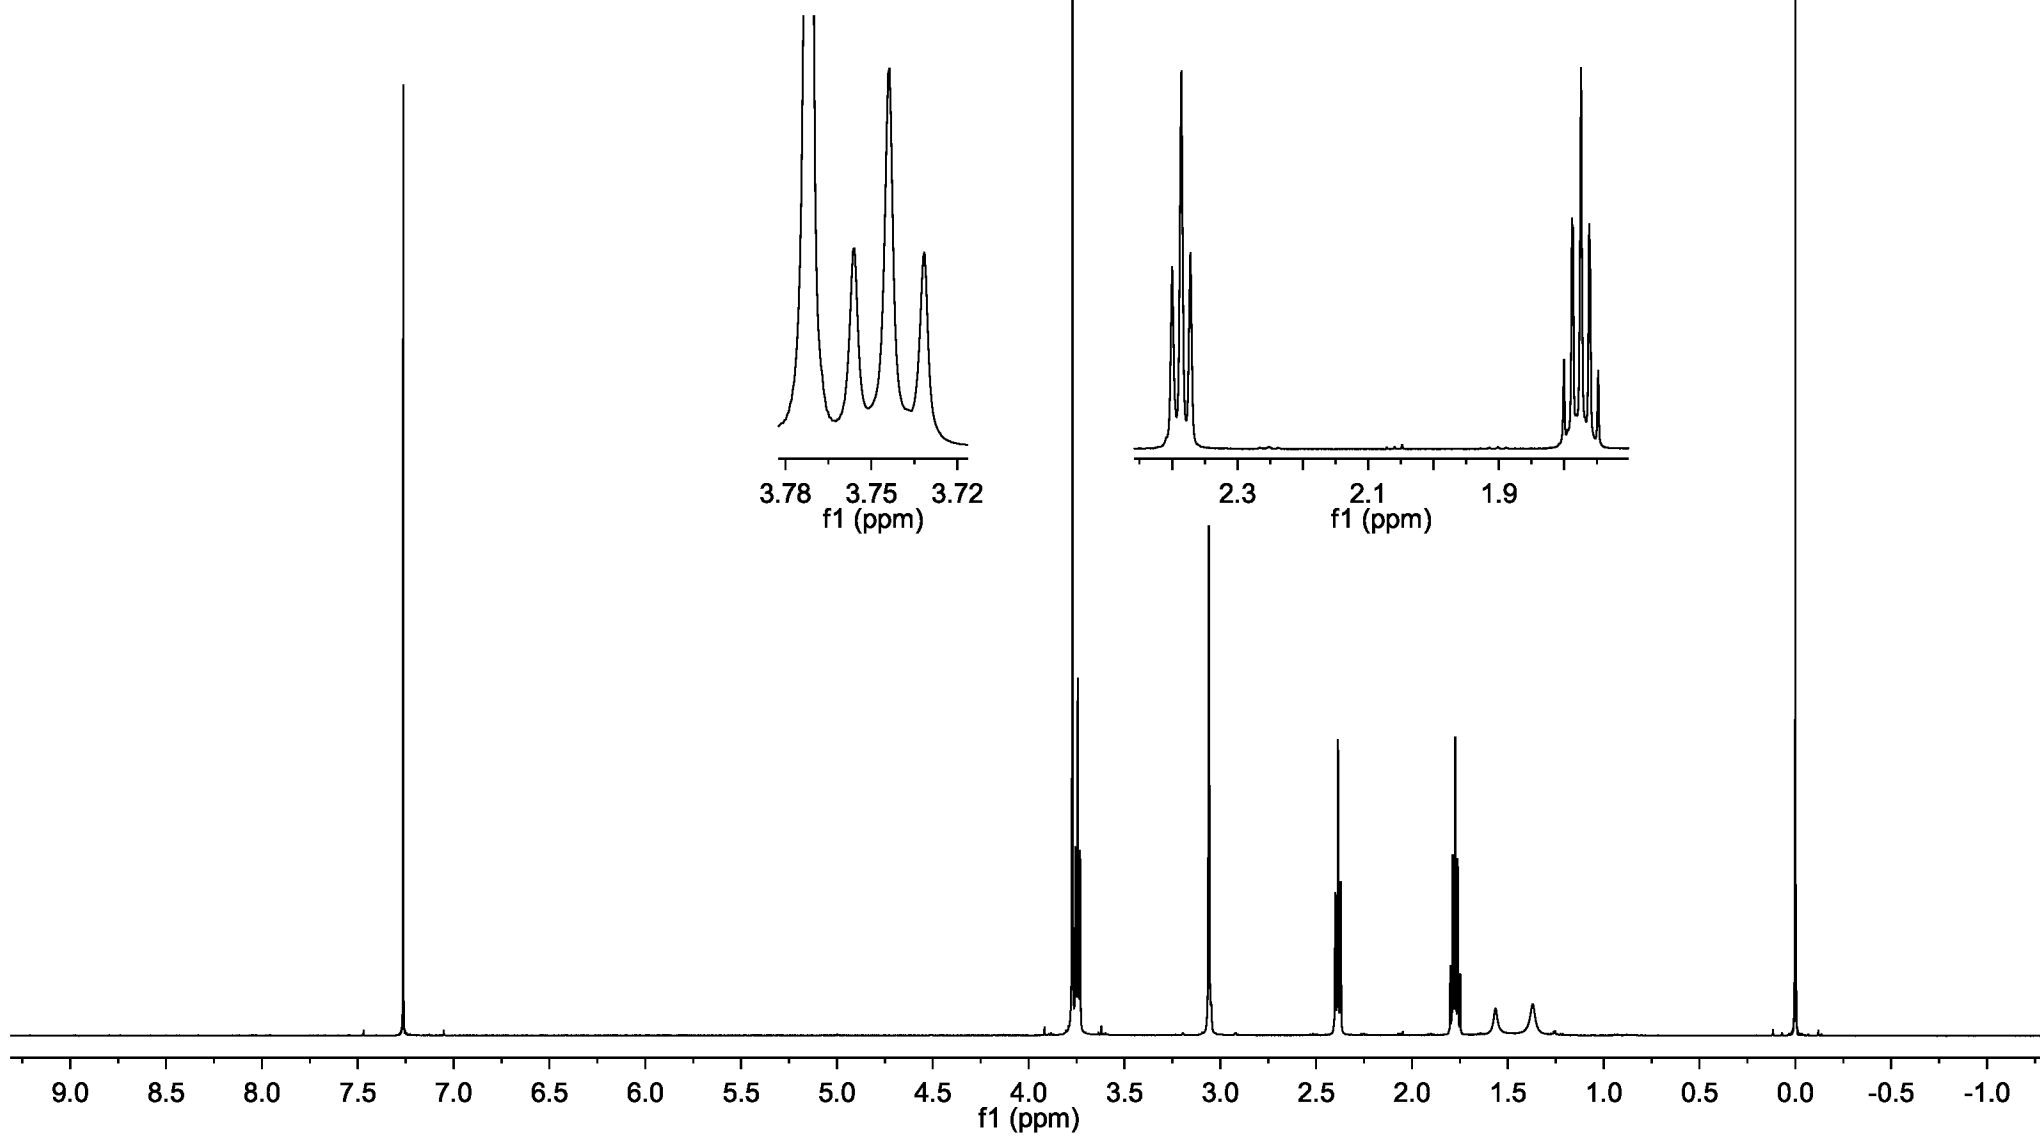

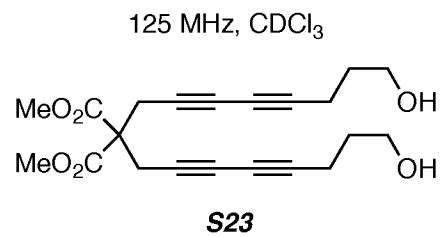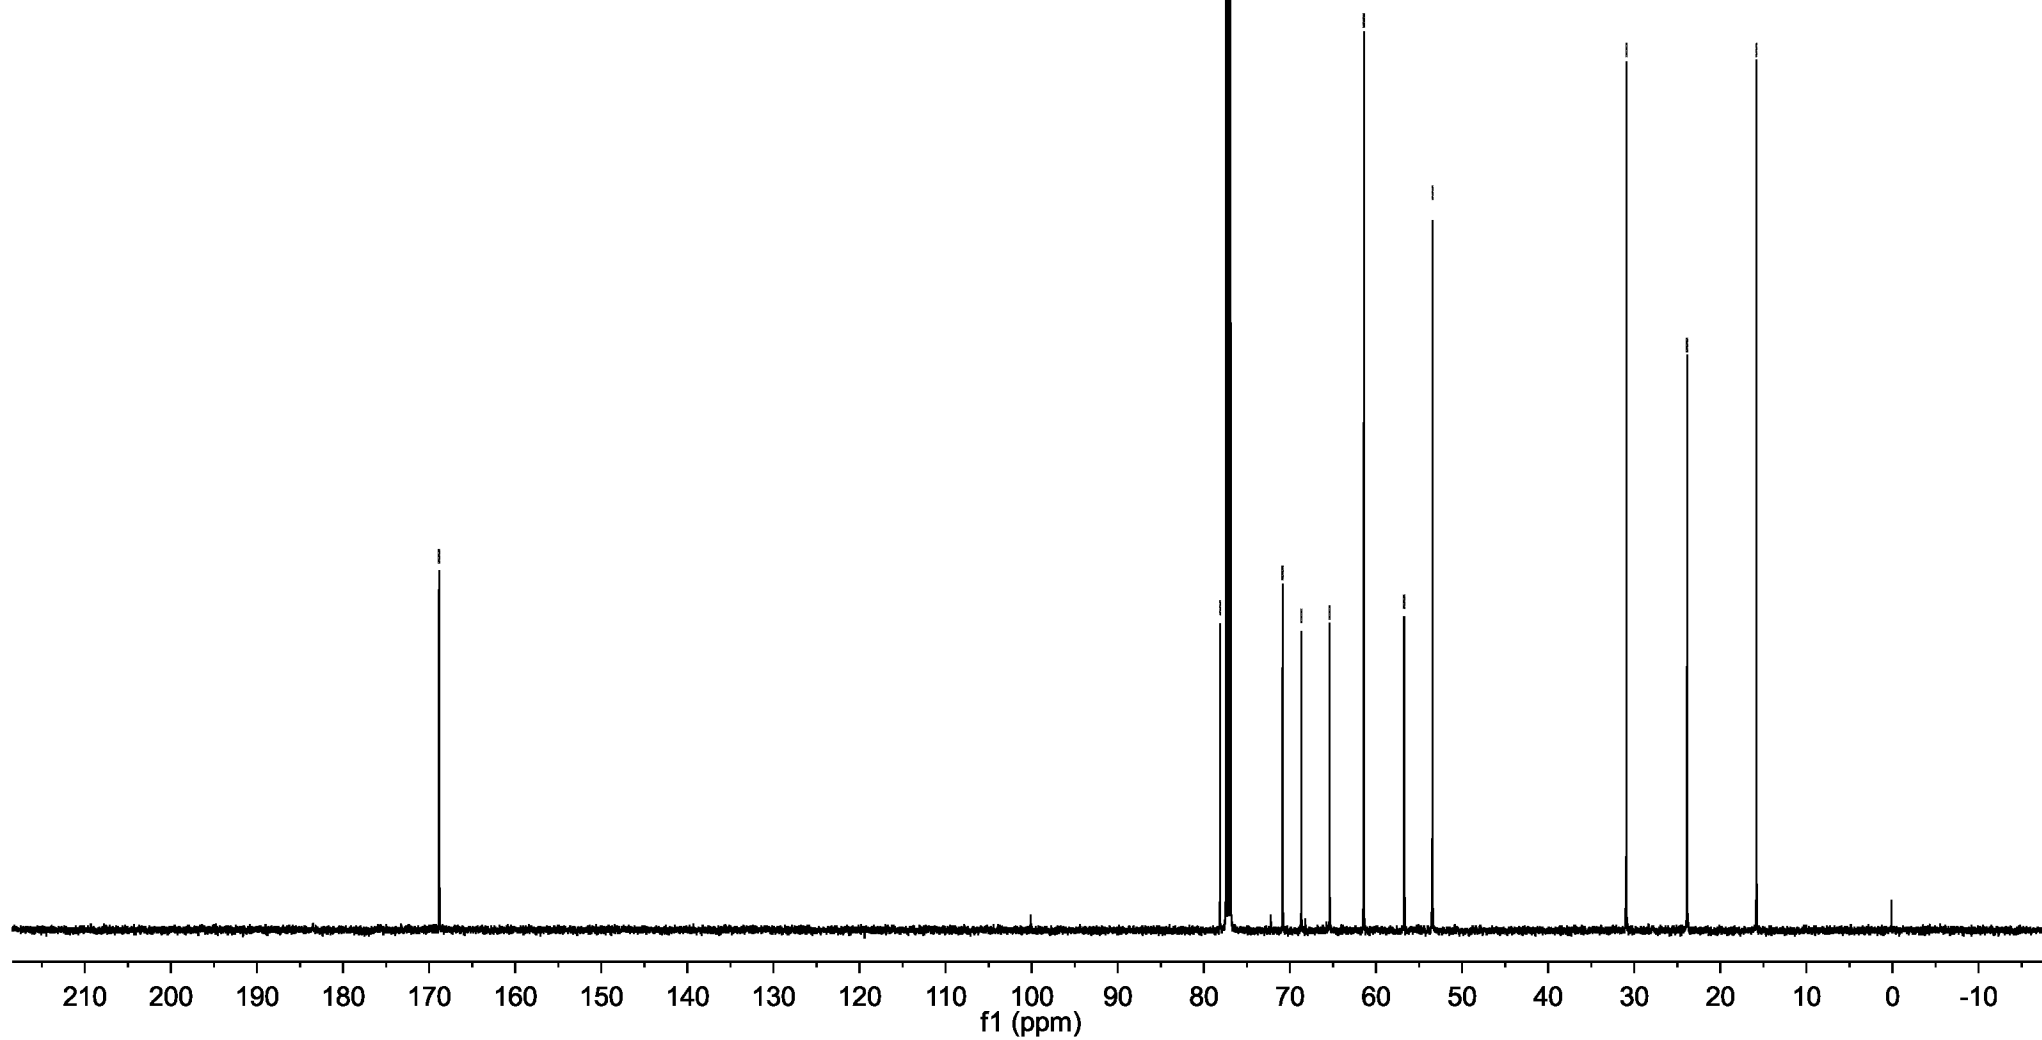

500 MHz, CDCl<sub>3</sub>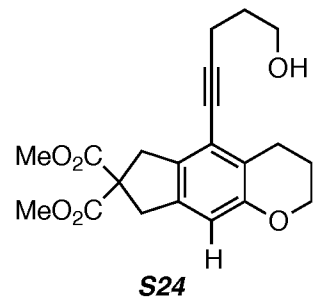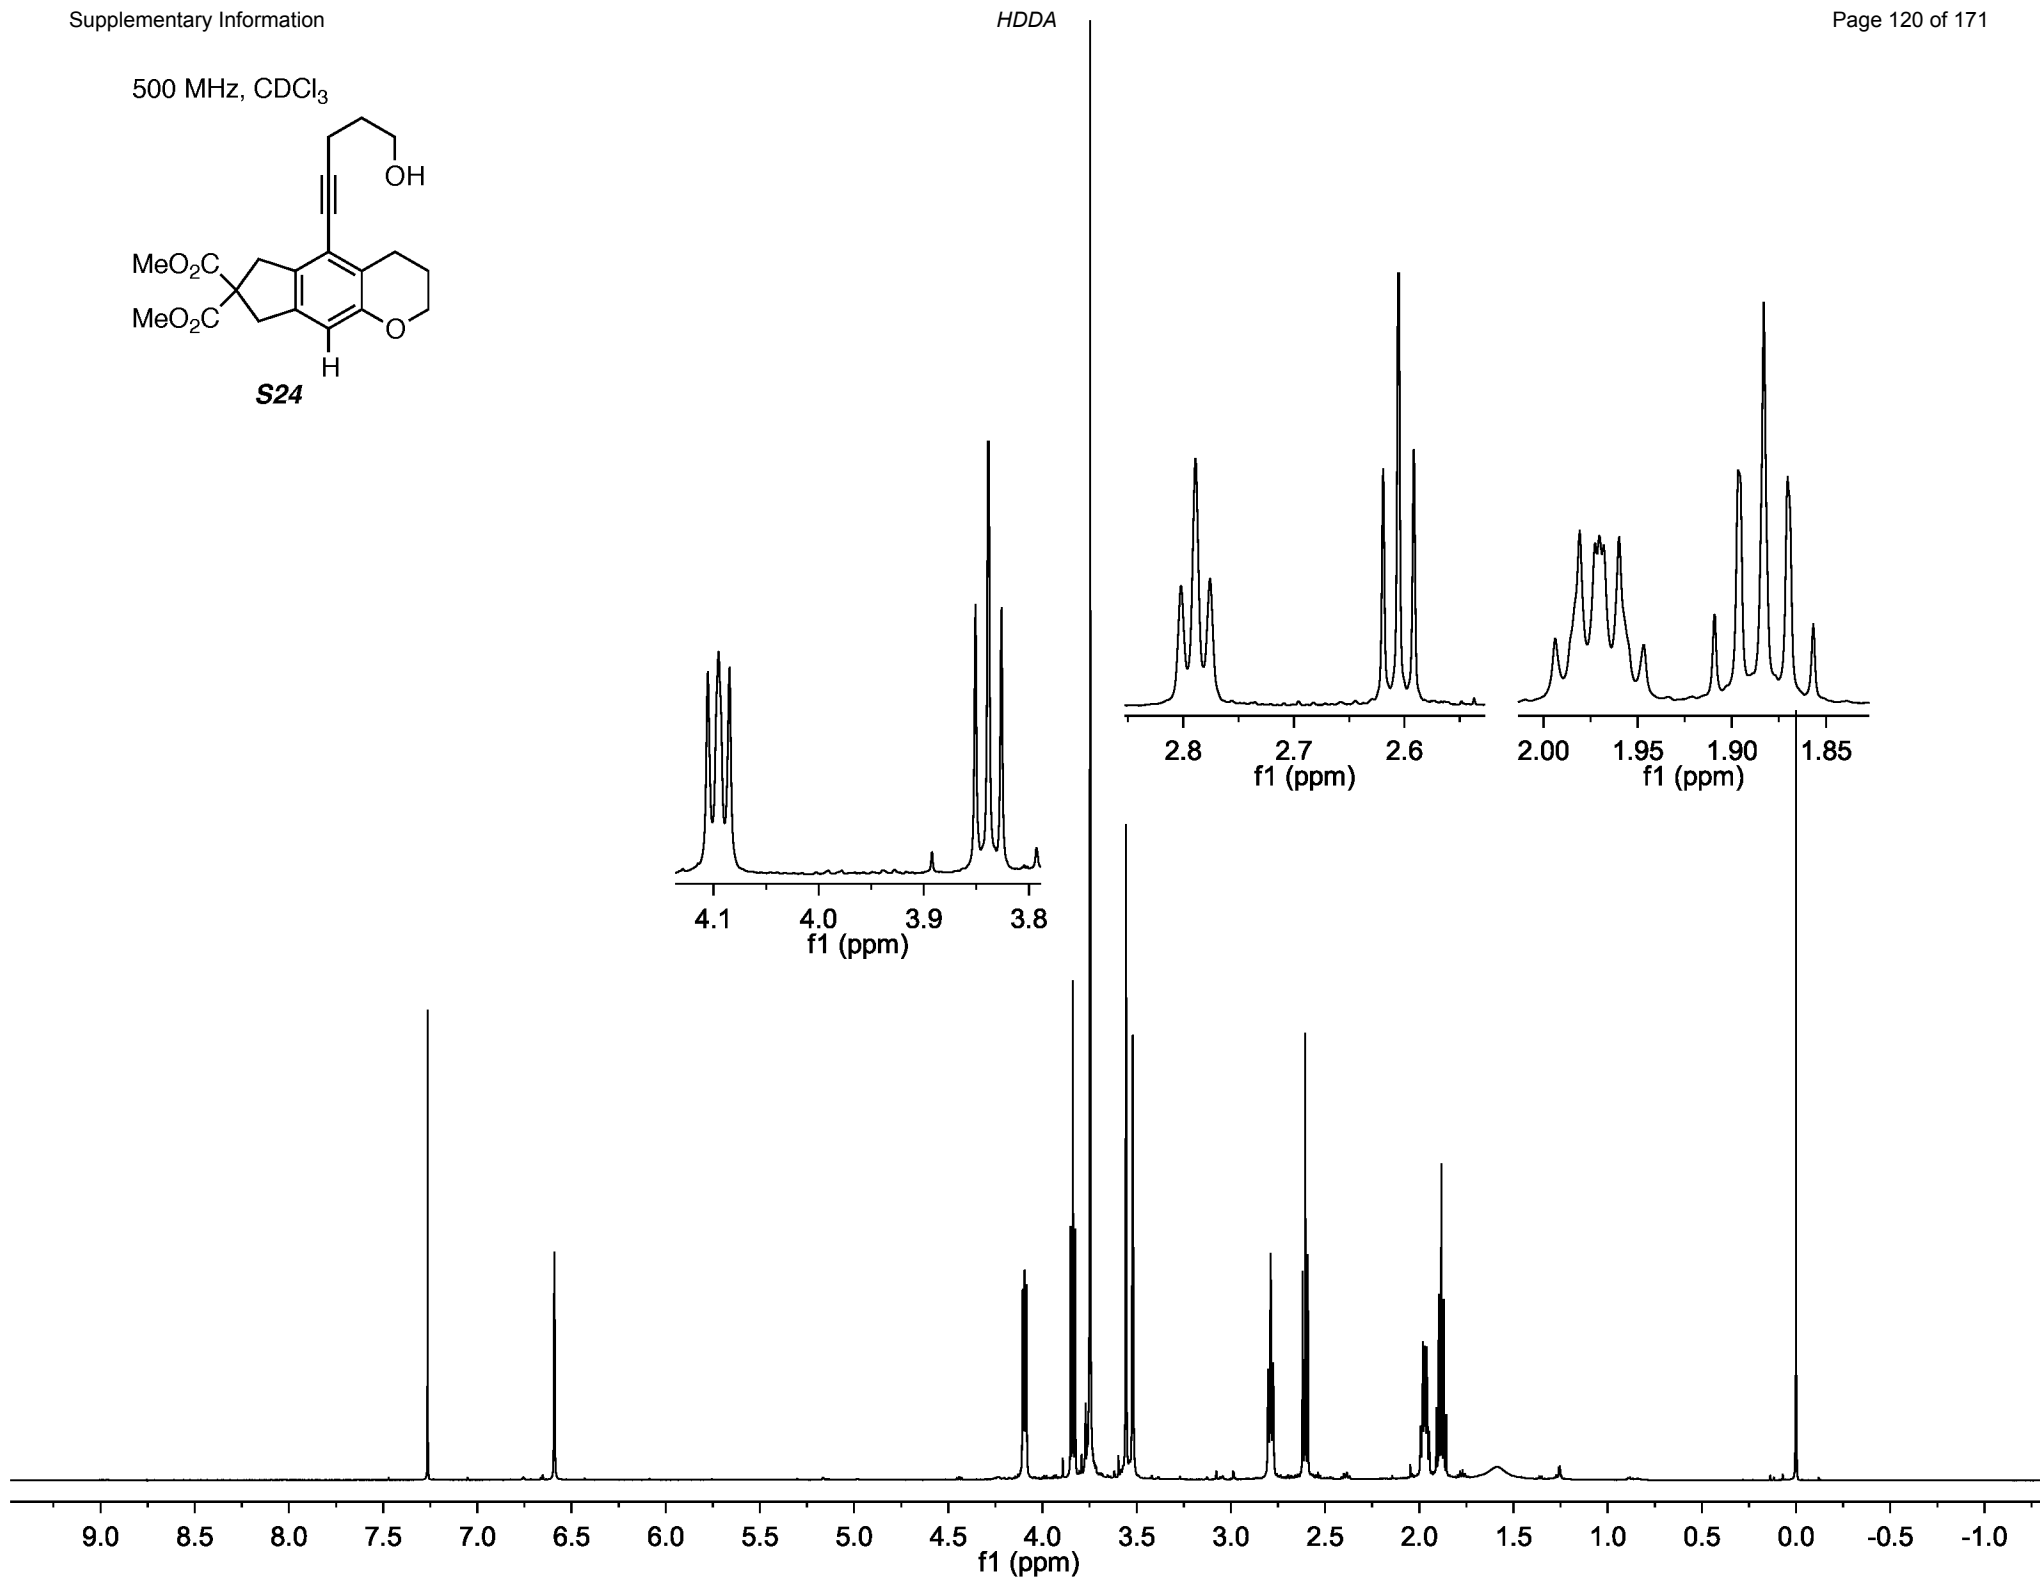



125 MHz, CDCl<sub>3</sub>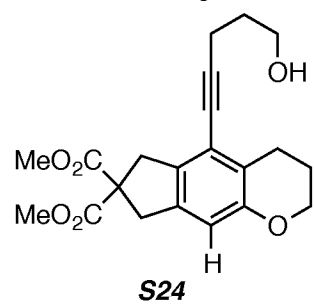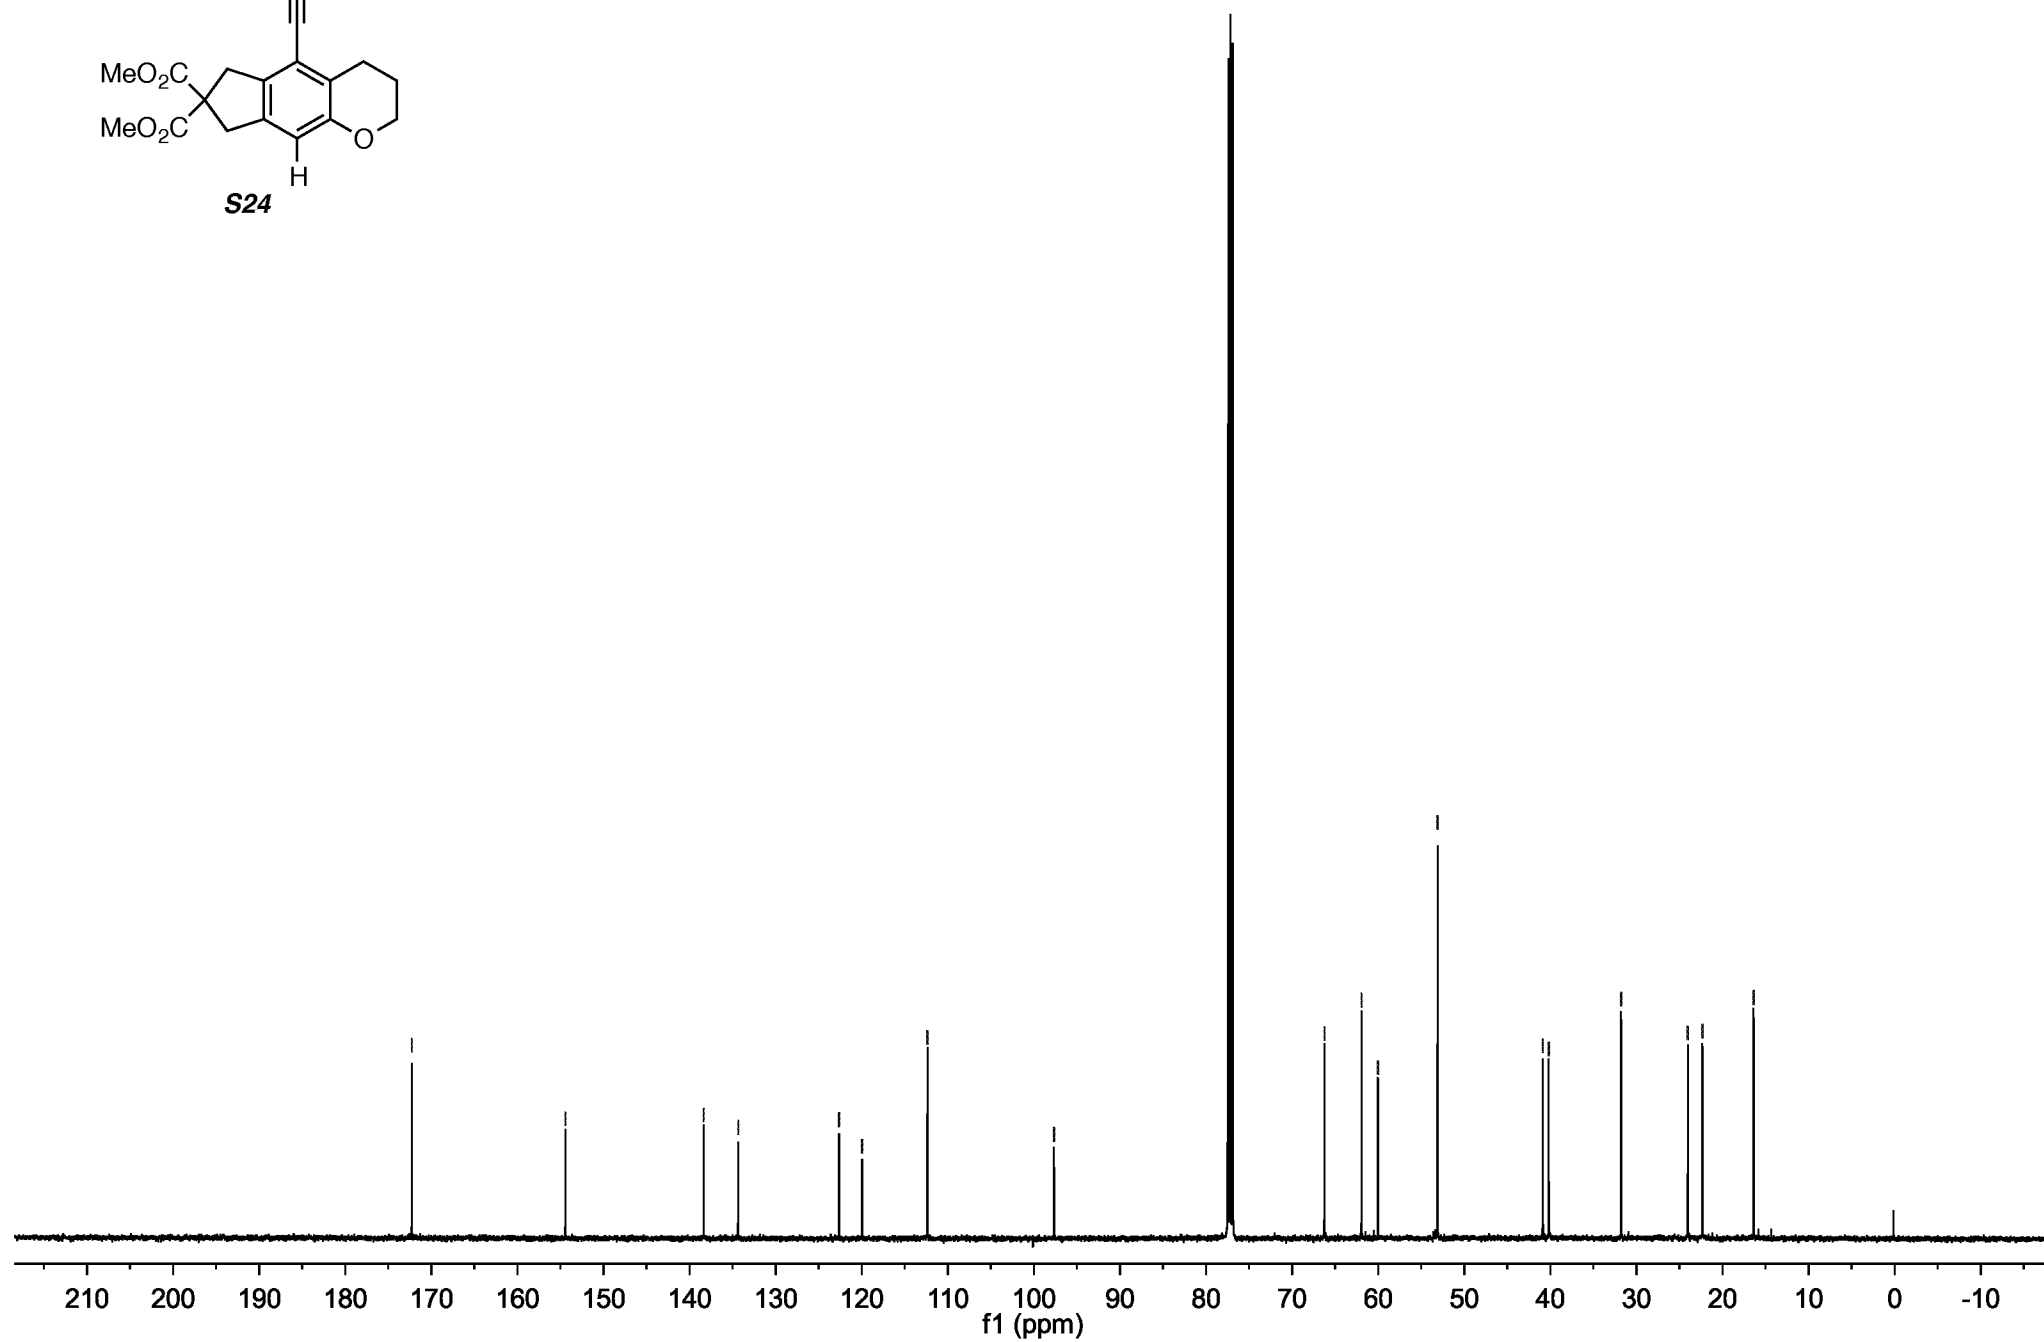

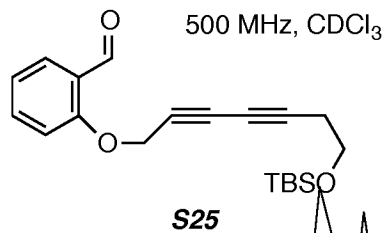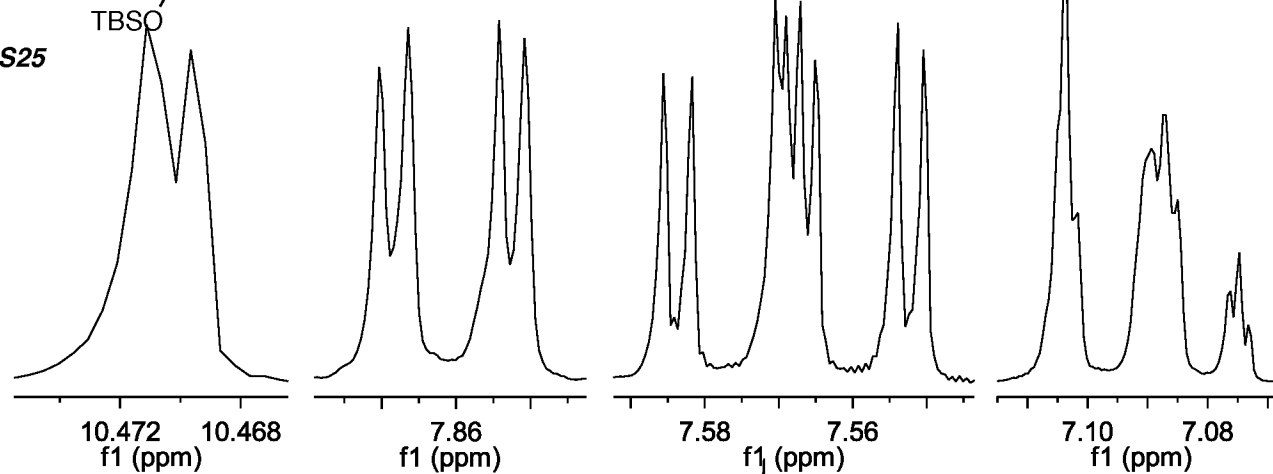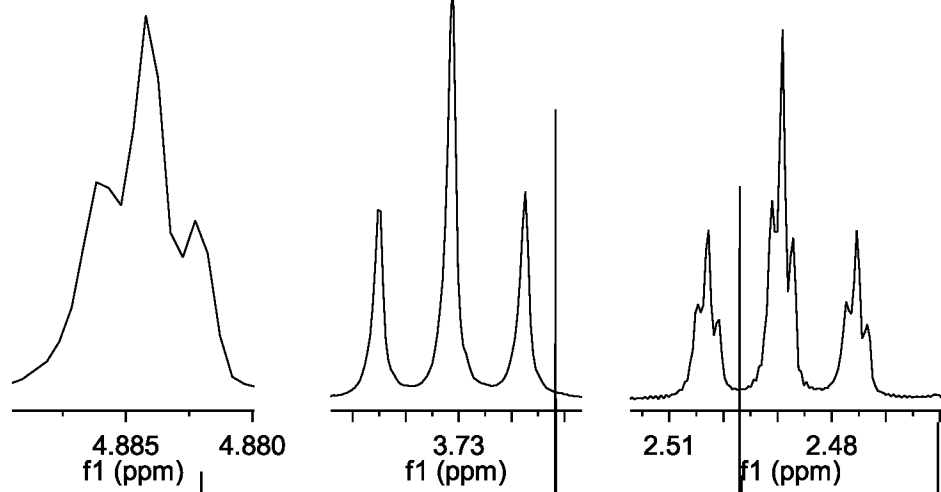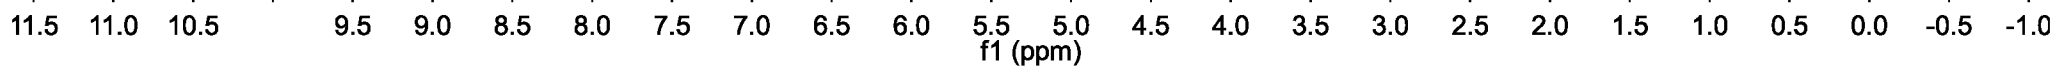

125 MHz, CDCl<sub>3</sub>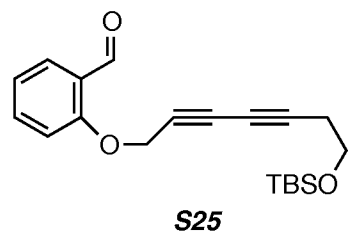**S25**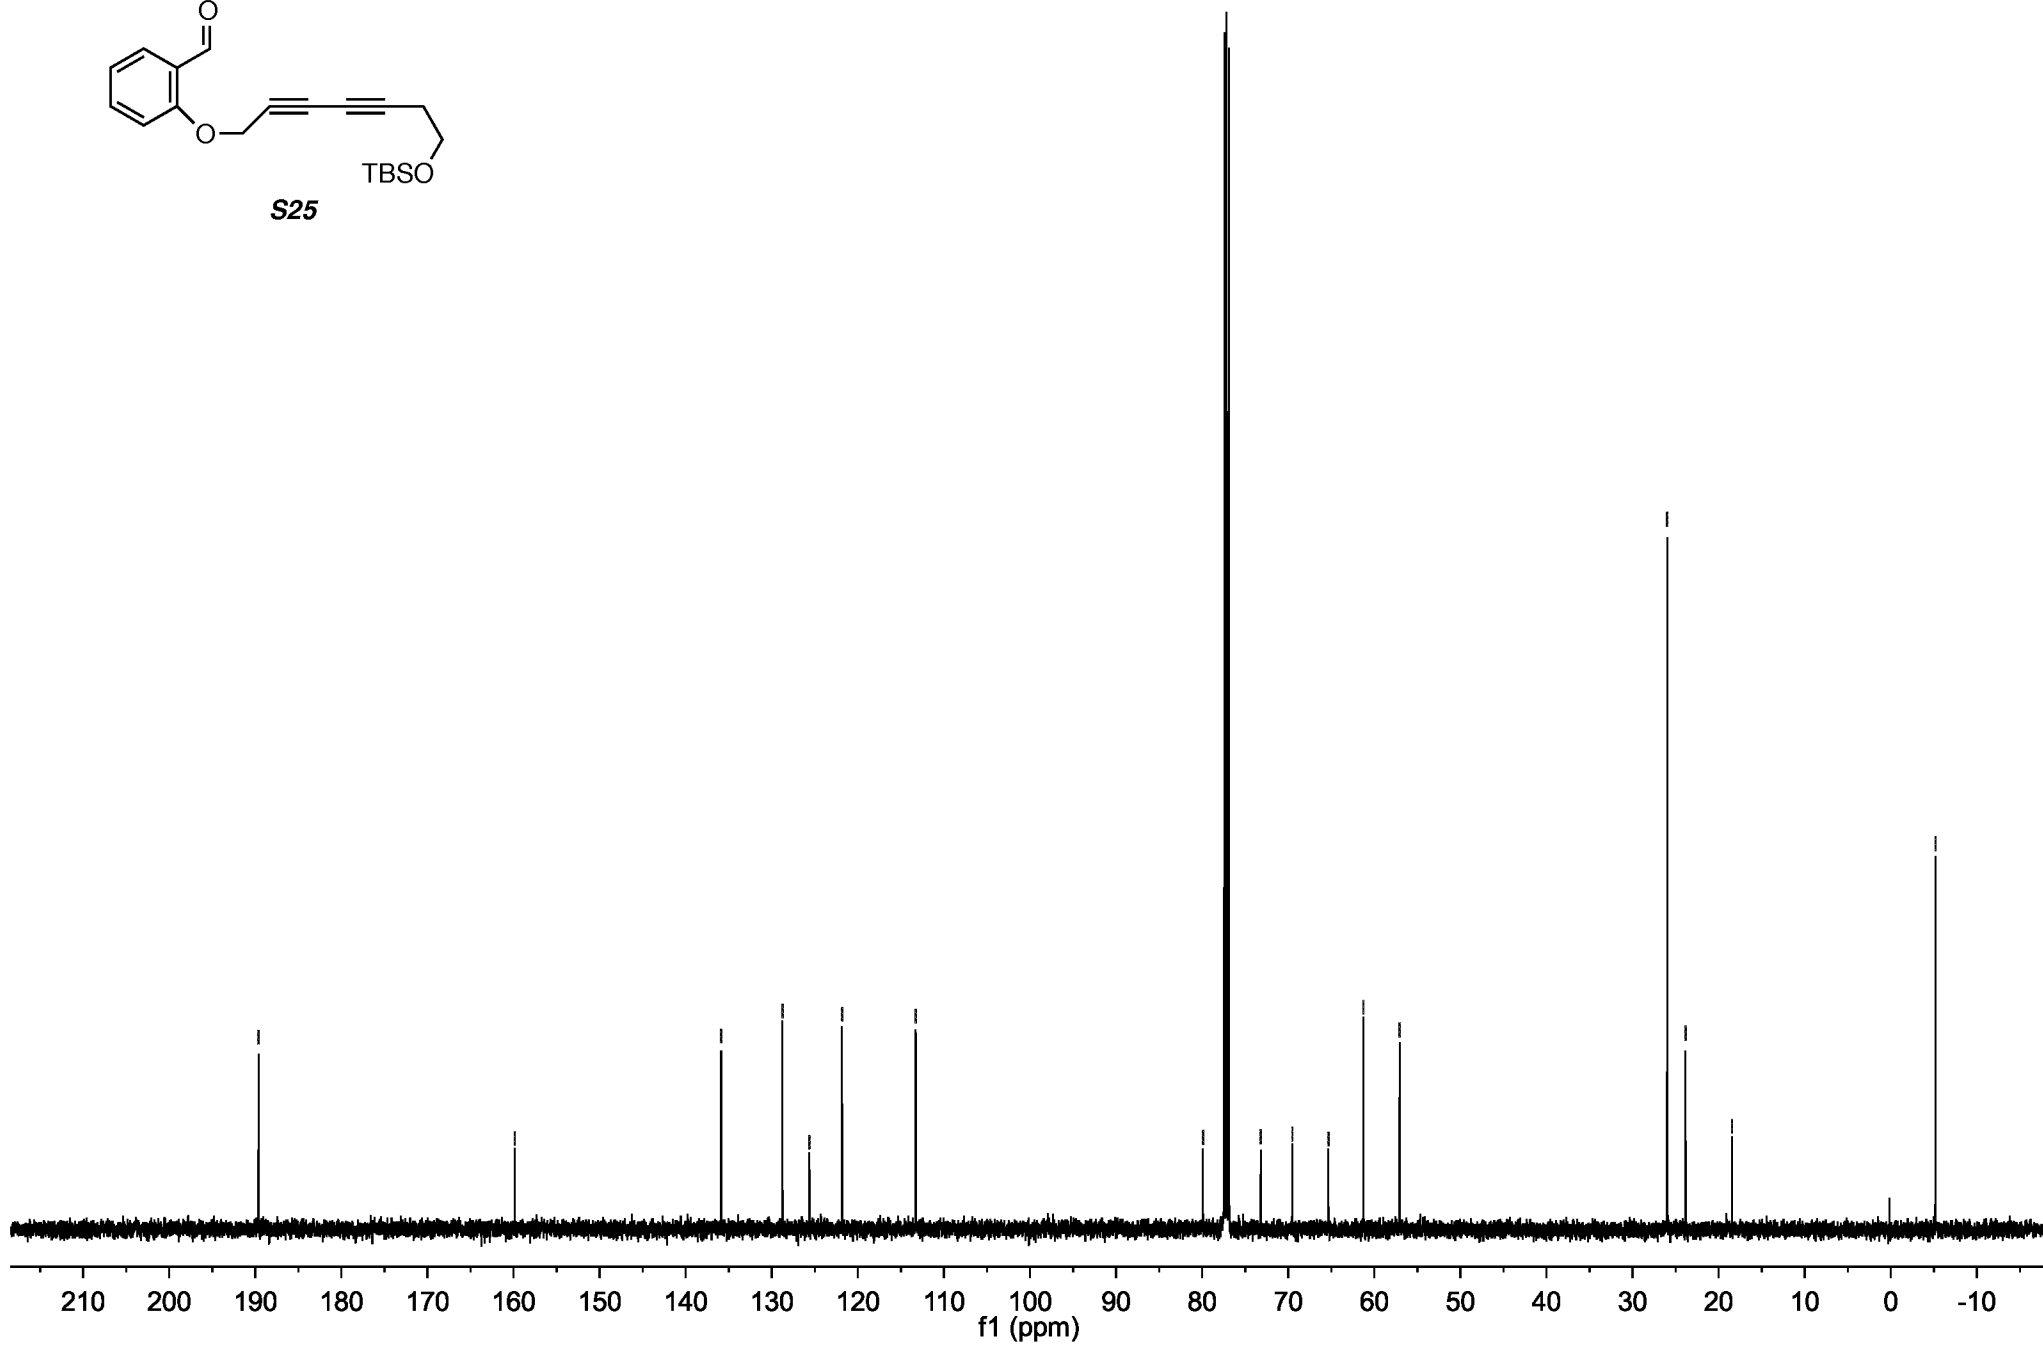

500 MHz, CDCl<sub>3</sub>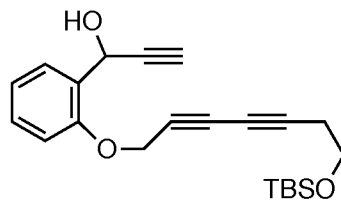

S26

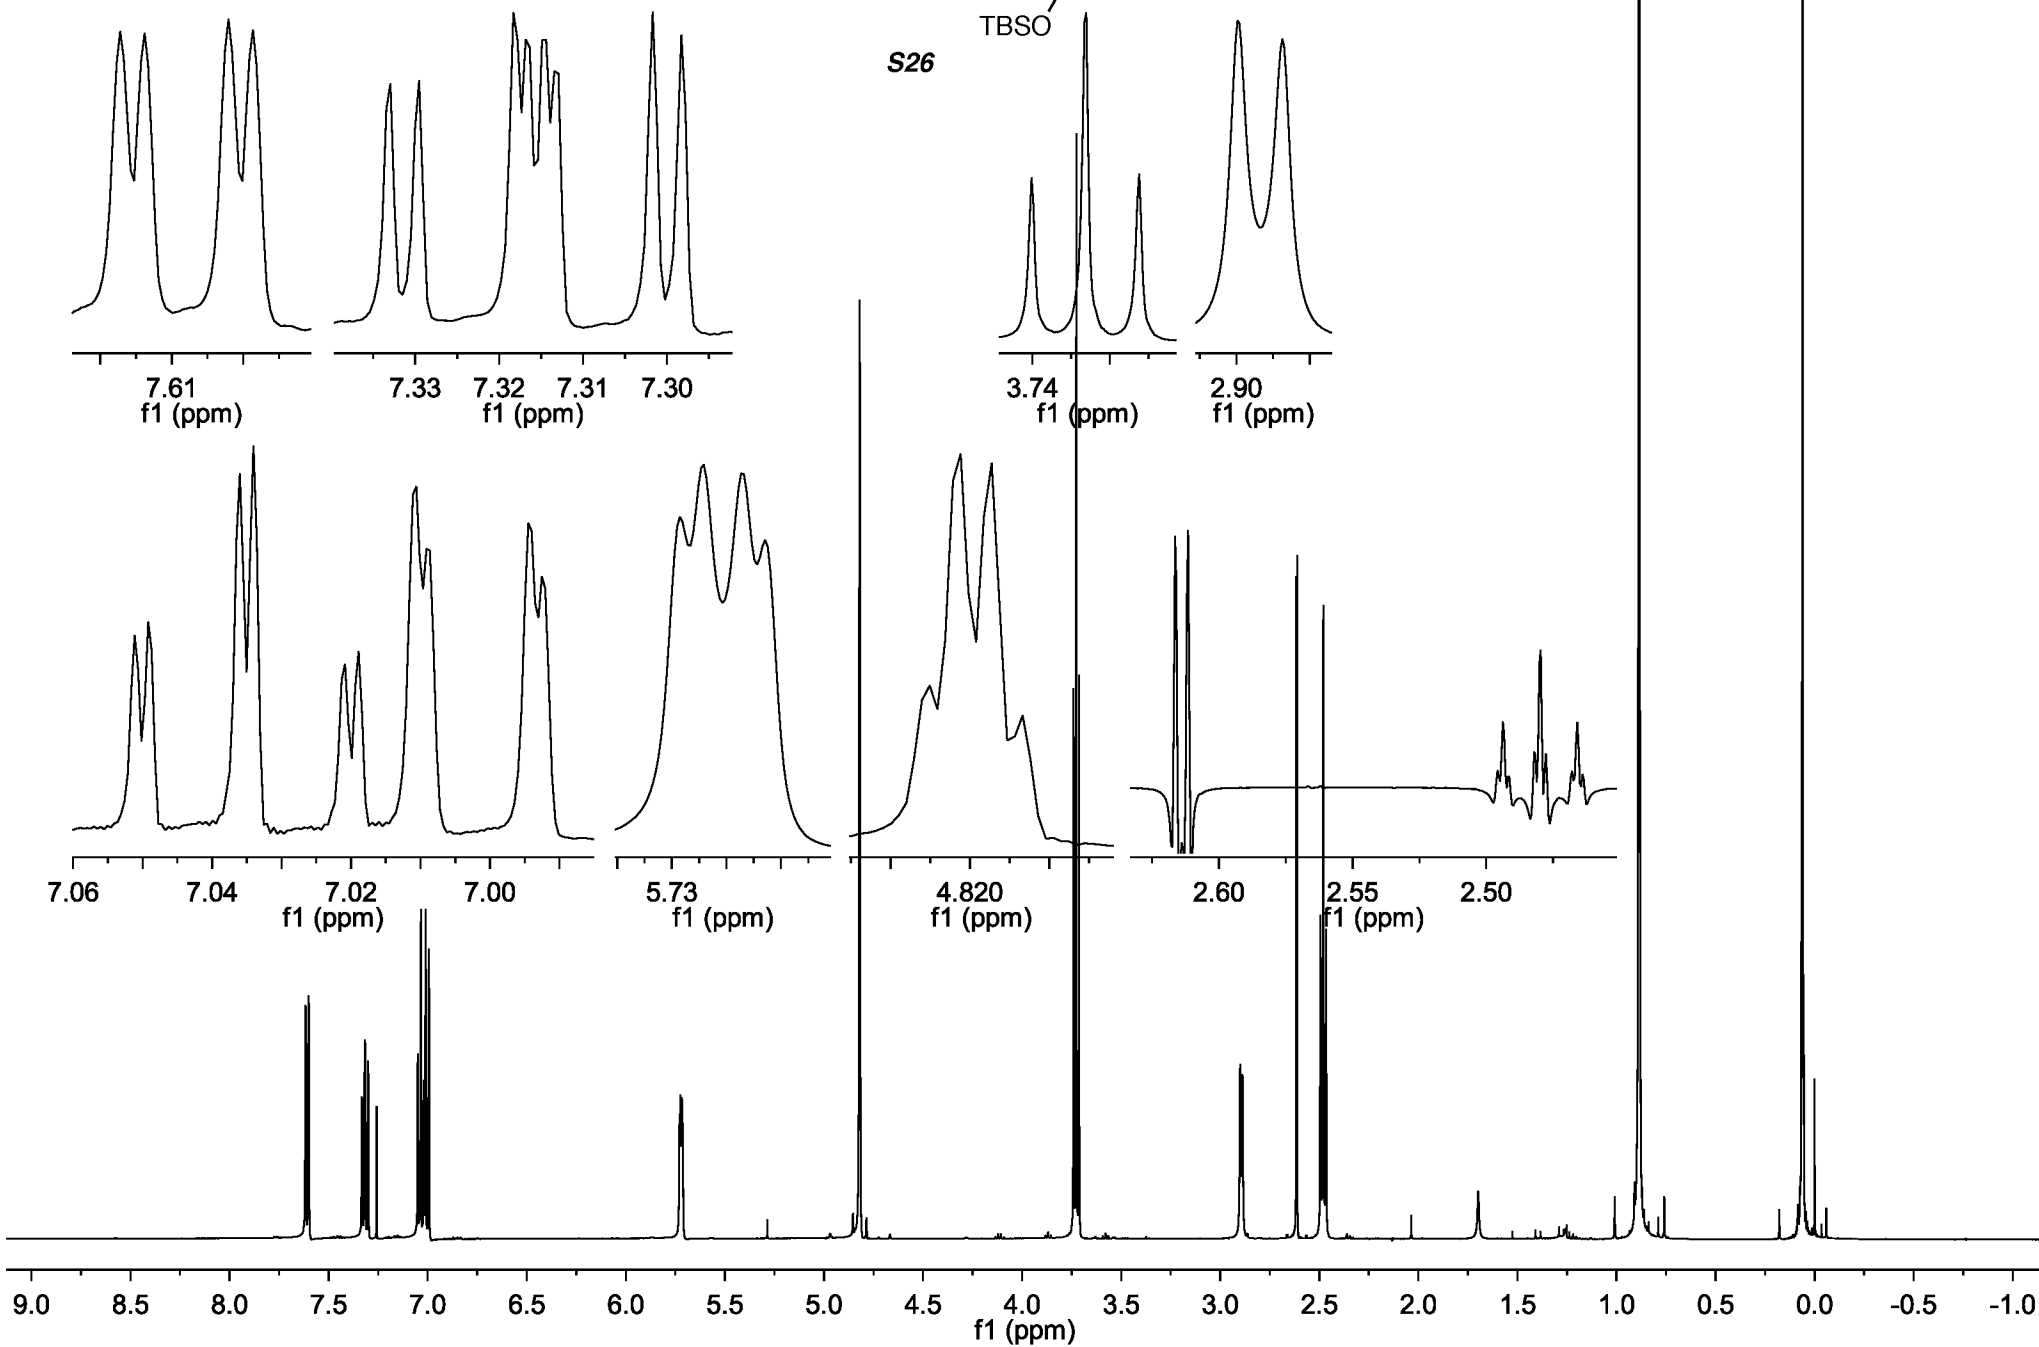

125 MHz, CDCl<sub>3</sub>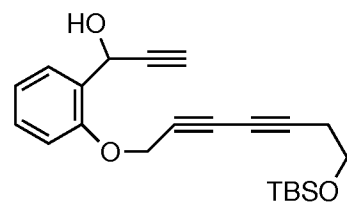**S26**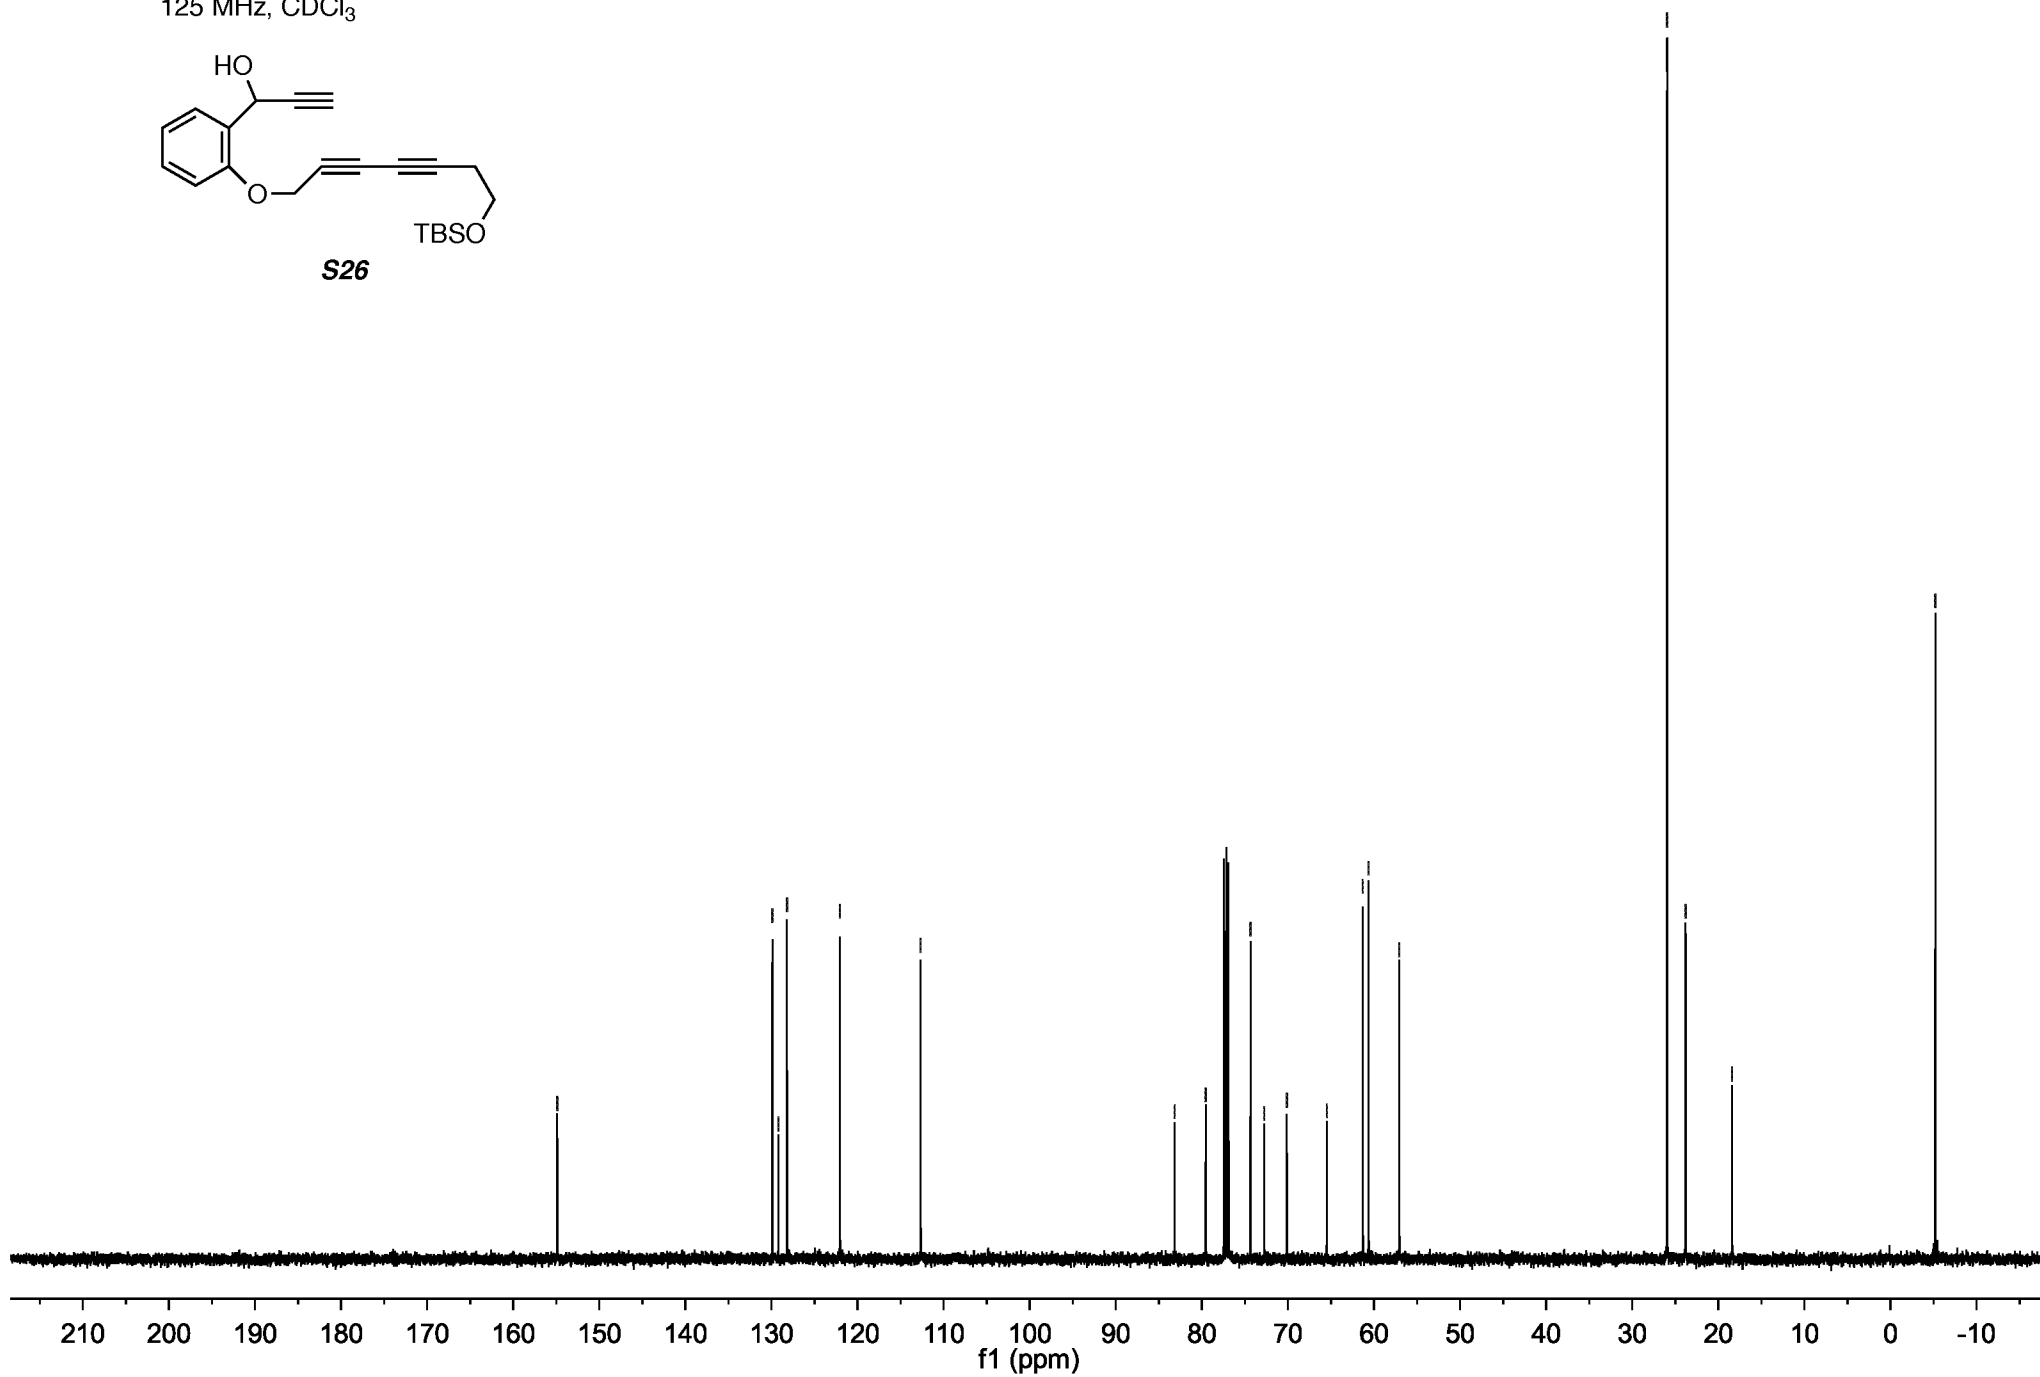

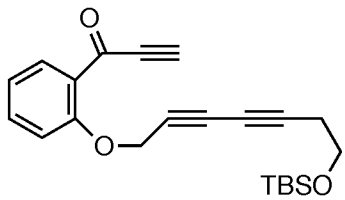

S27

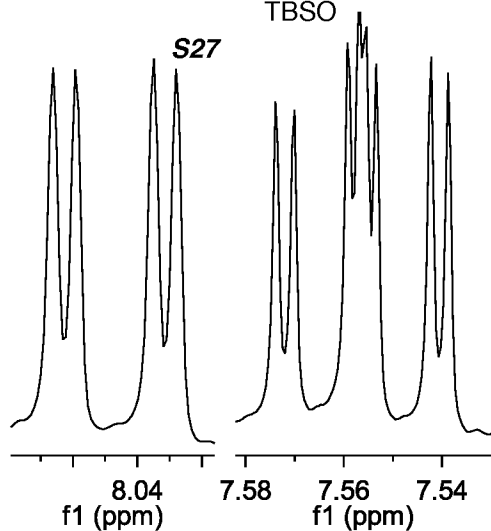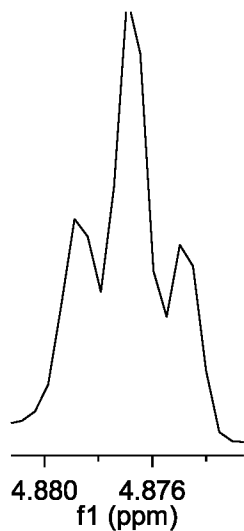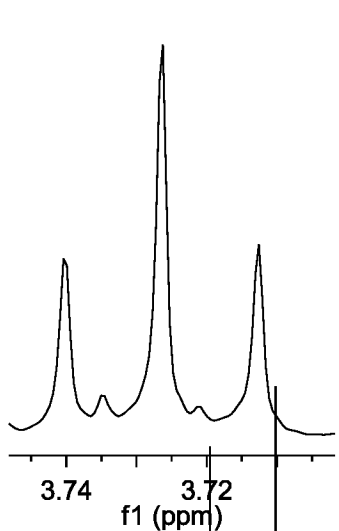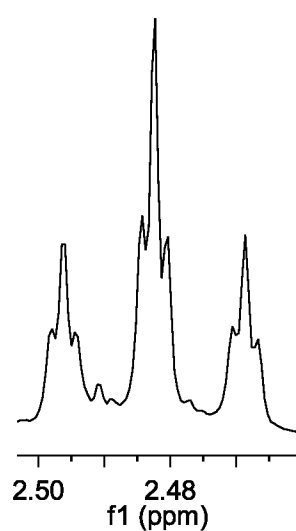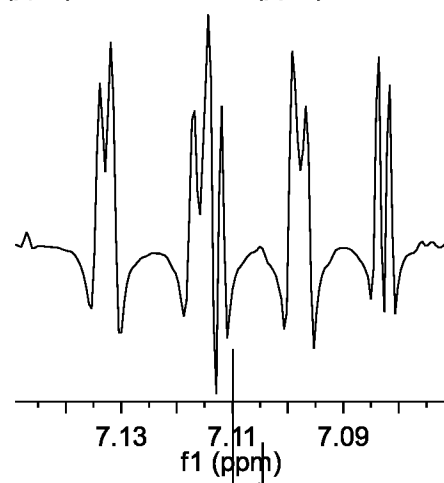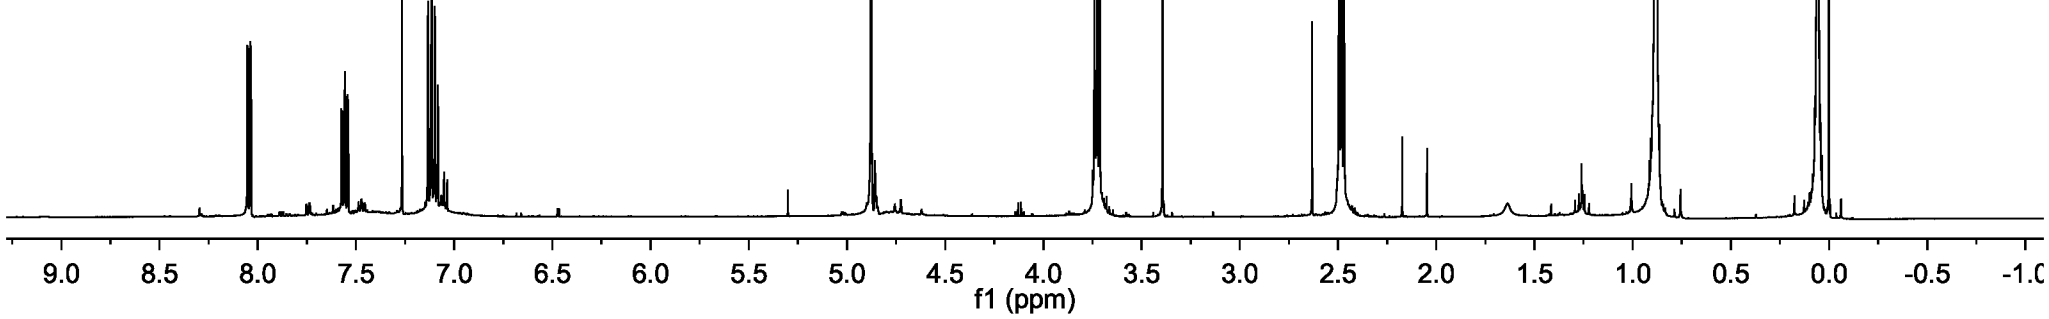

125 MHz, CDCl<sub>3</sub>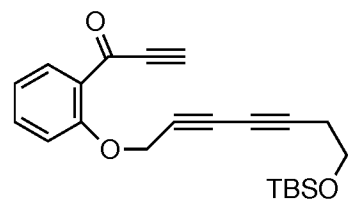**S27**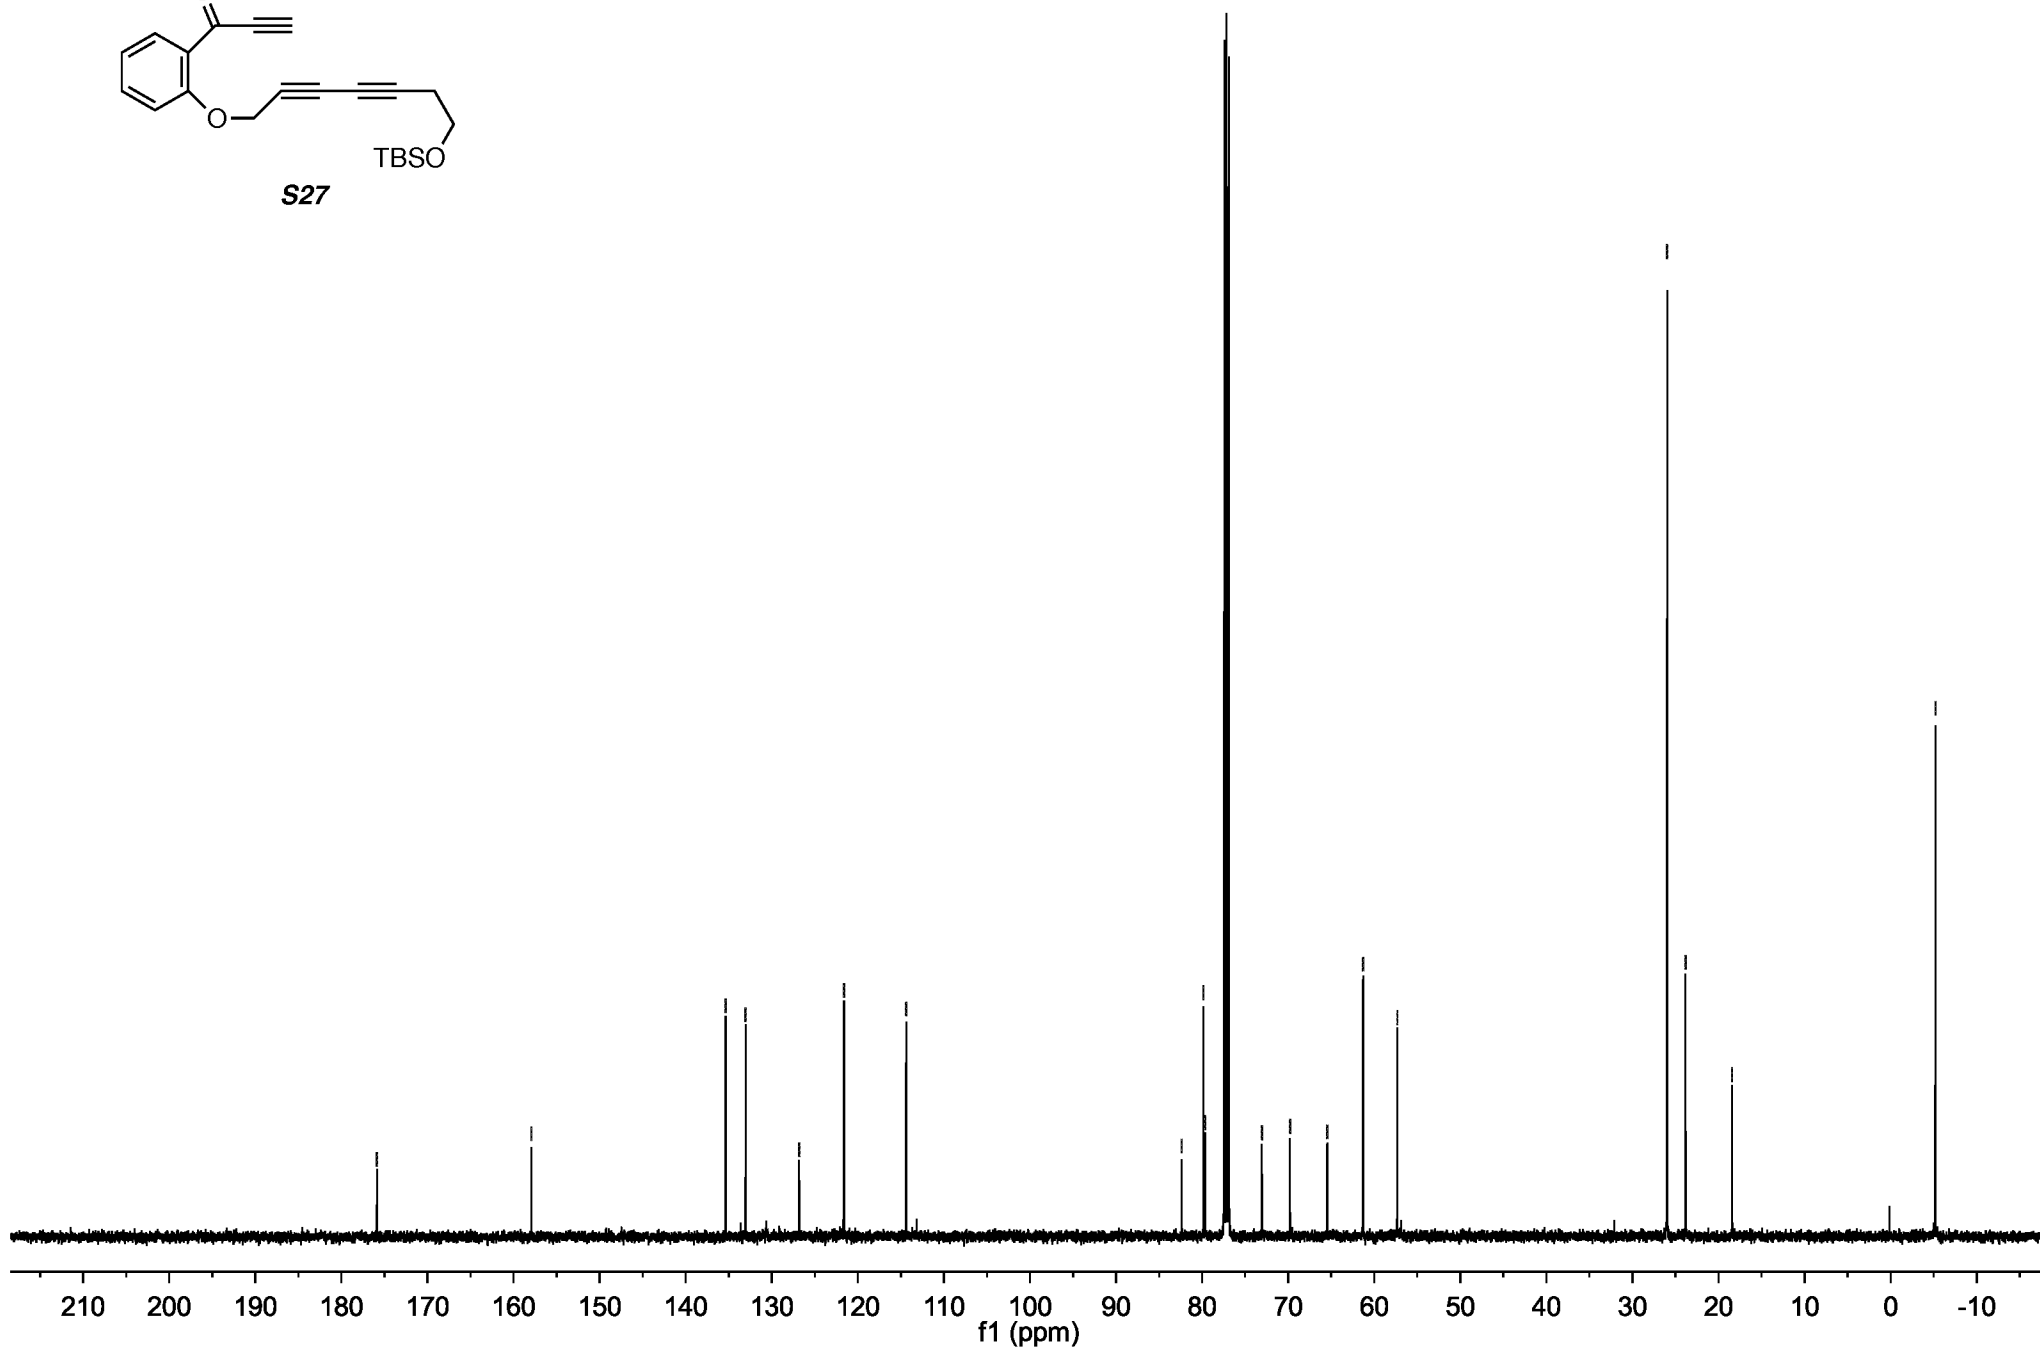

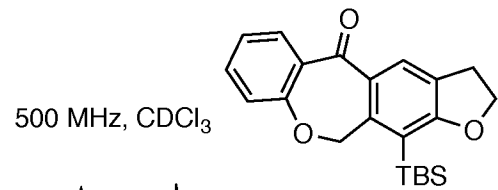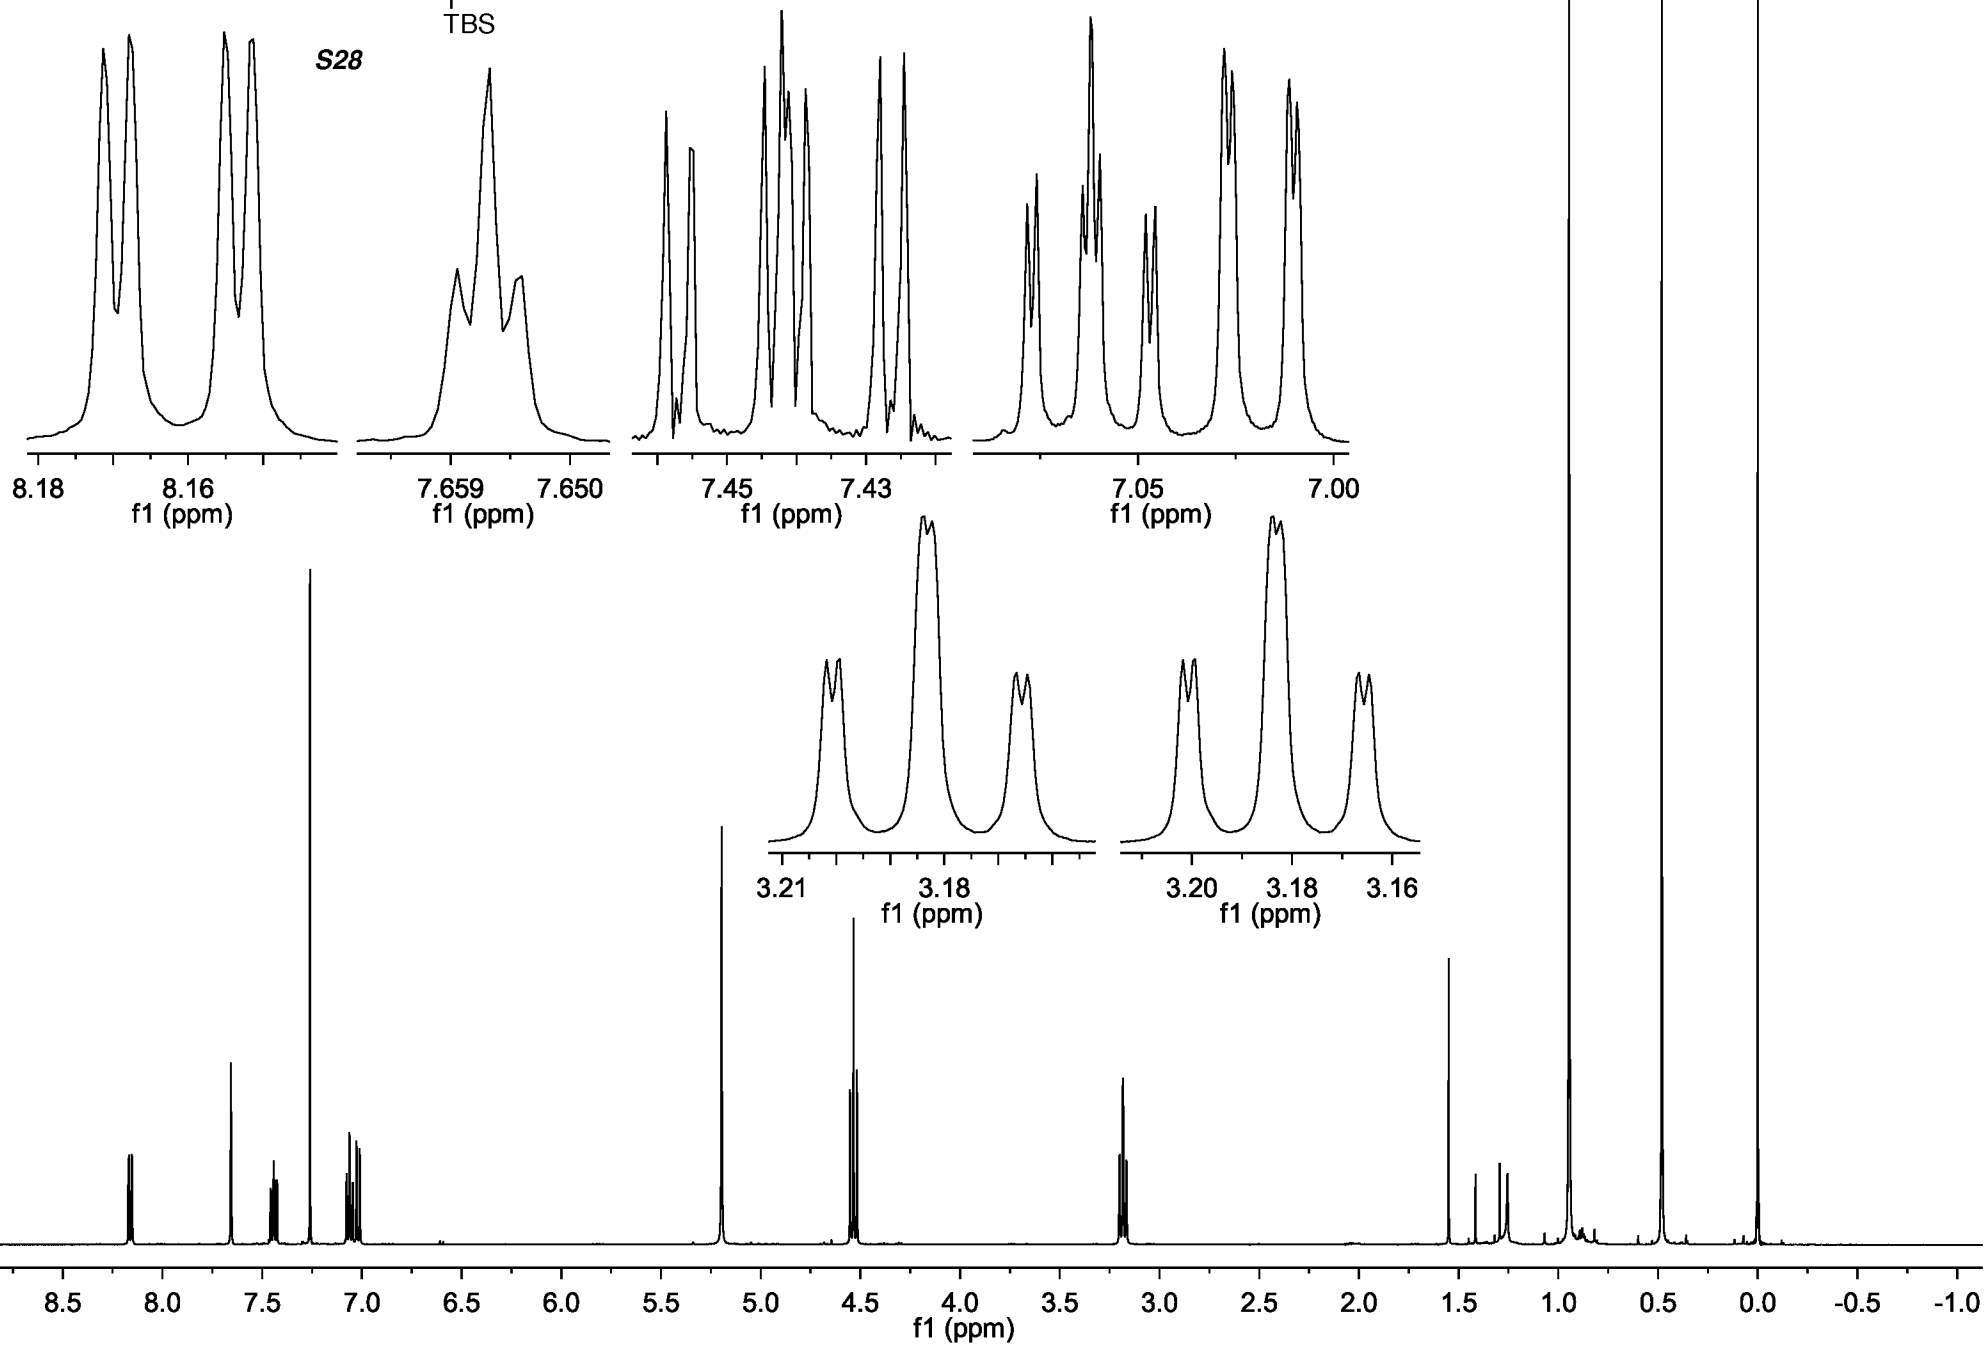



125 MHz, CDCl<sub>3</sub>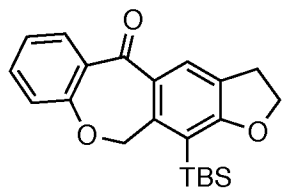**S28**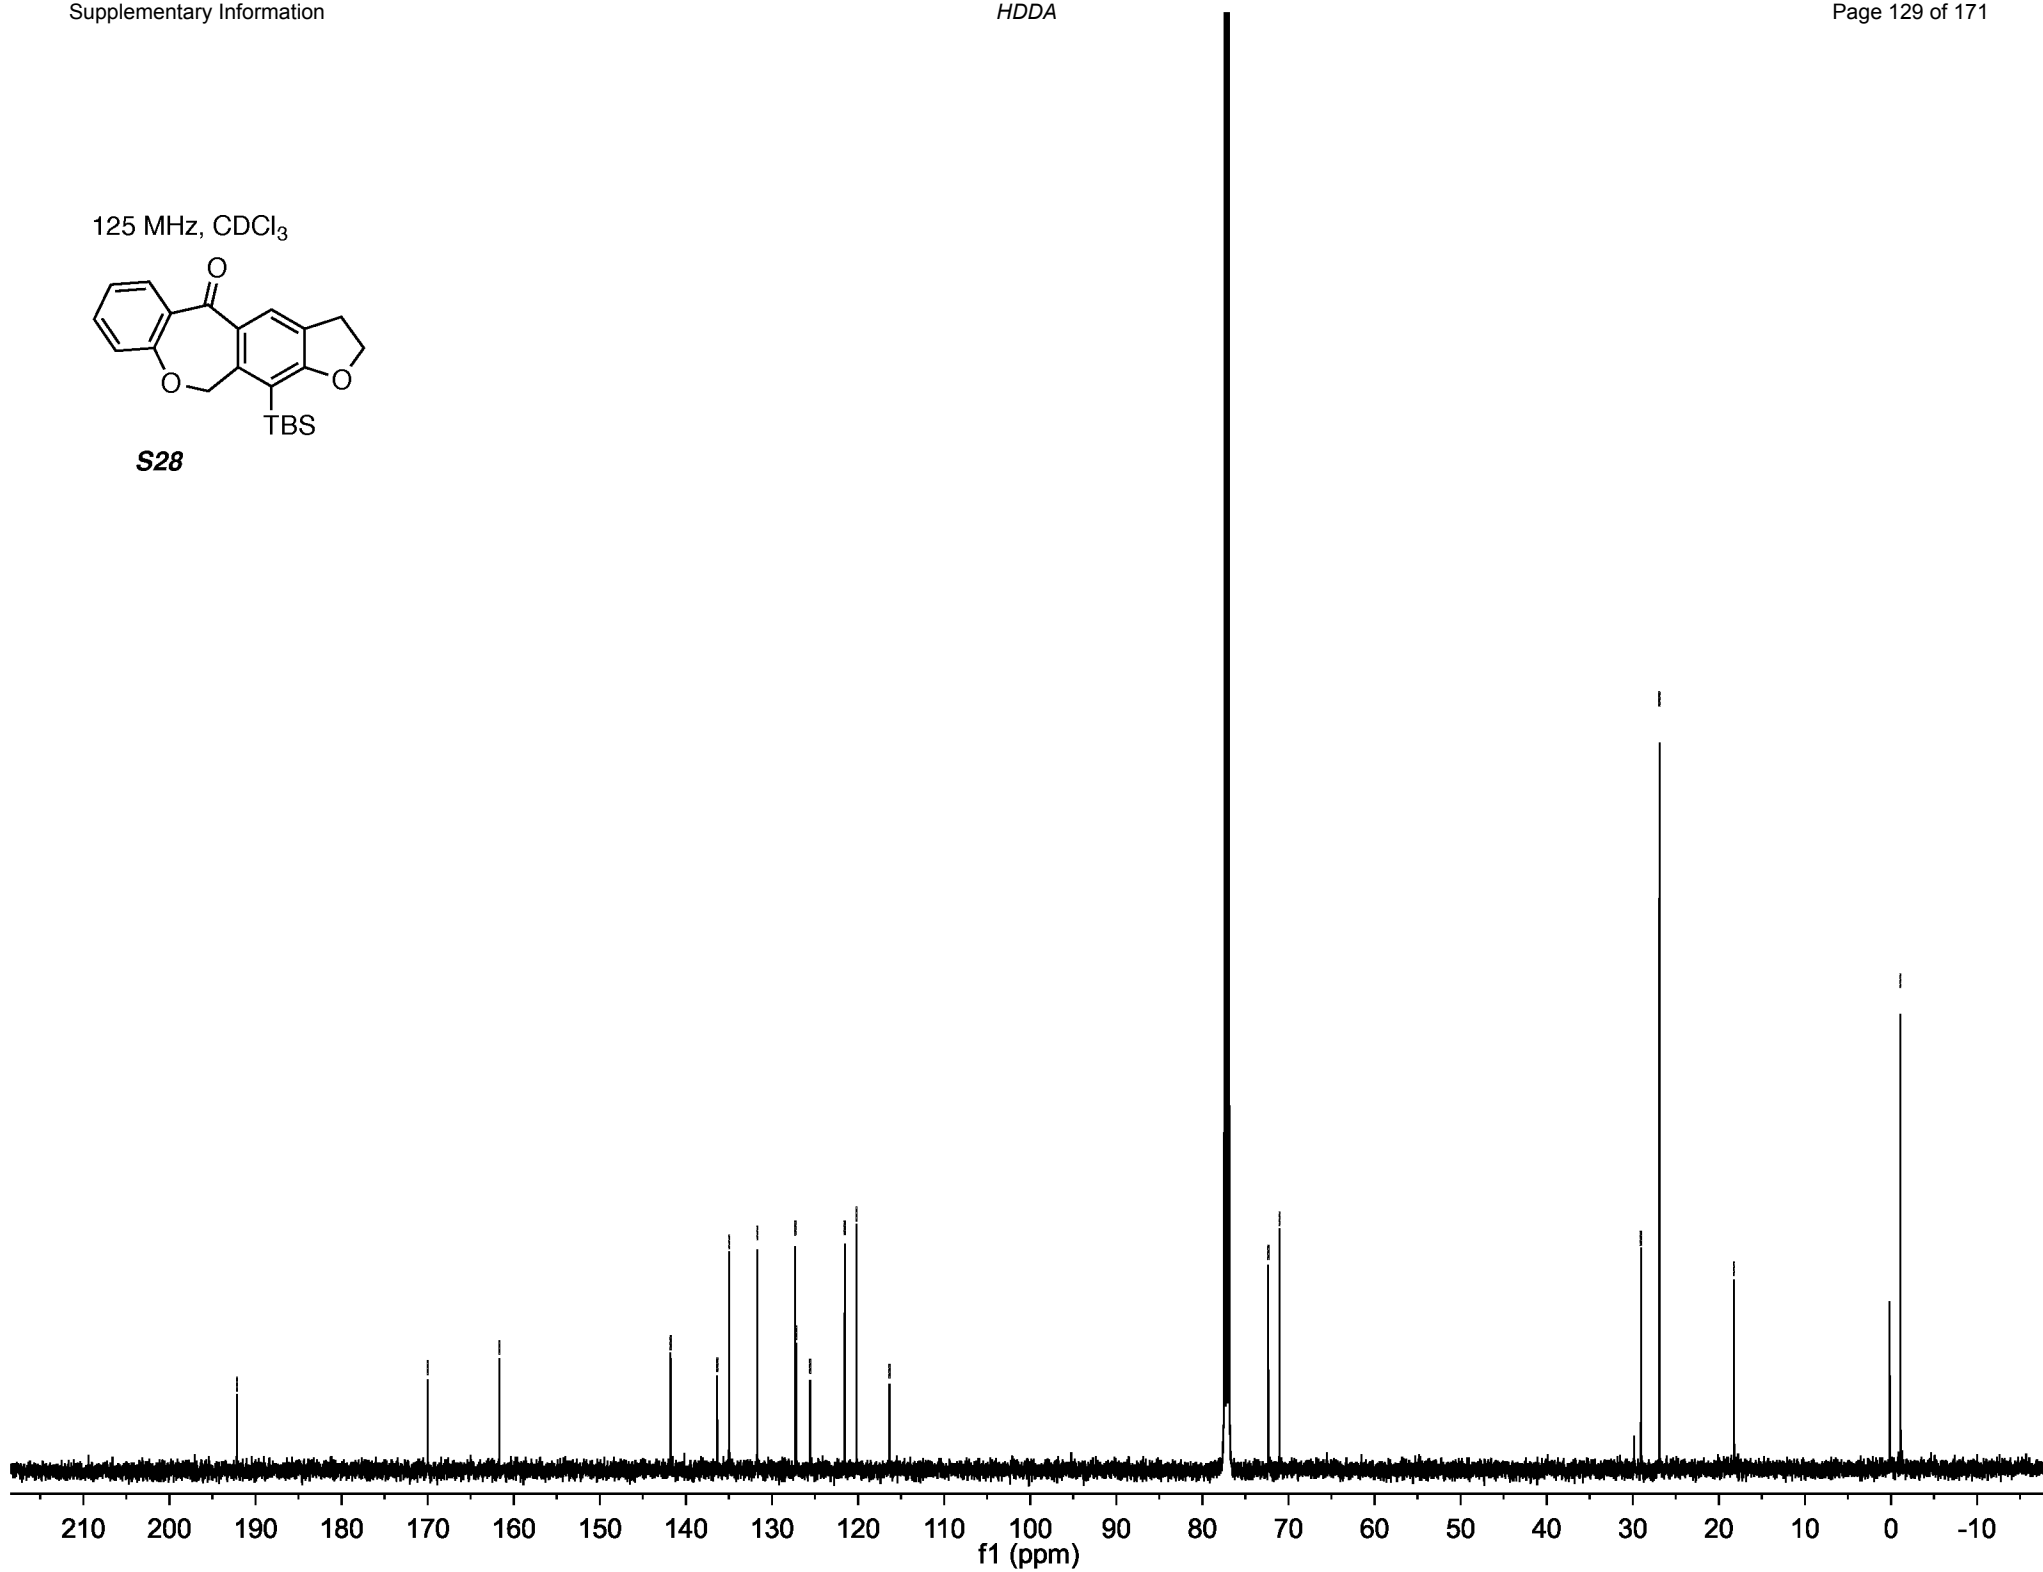

500 MHz, CDCl<sub>3</sub>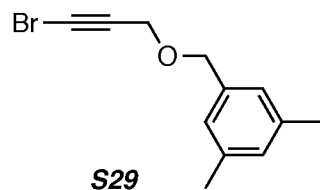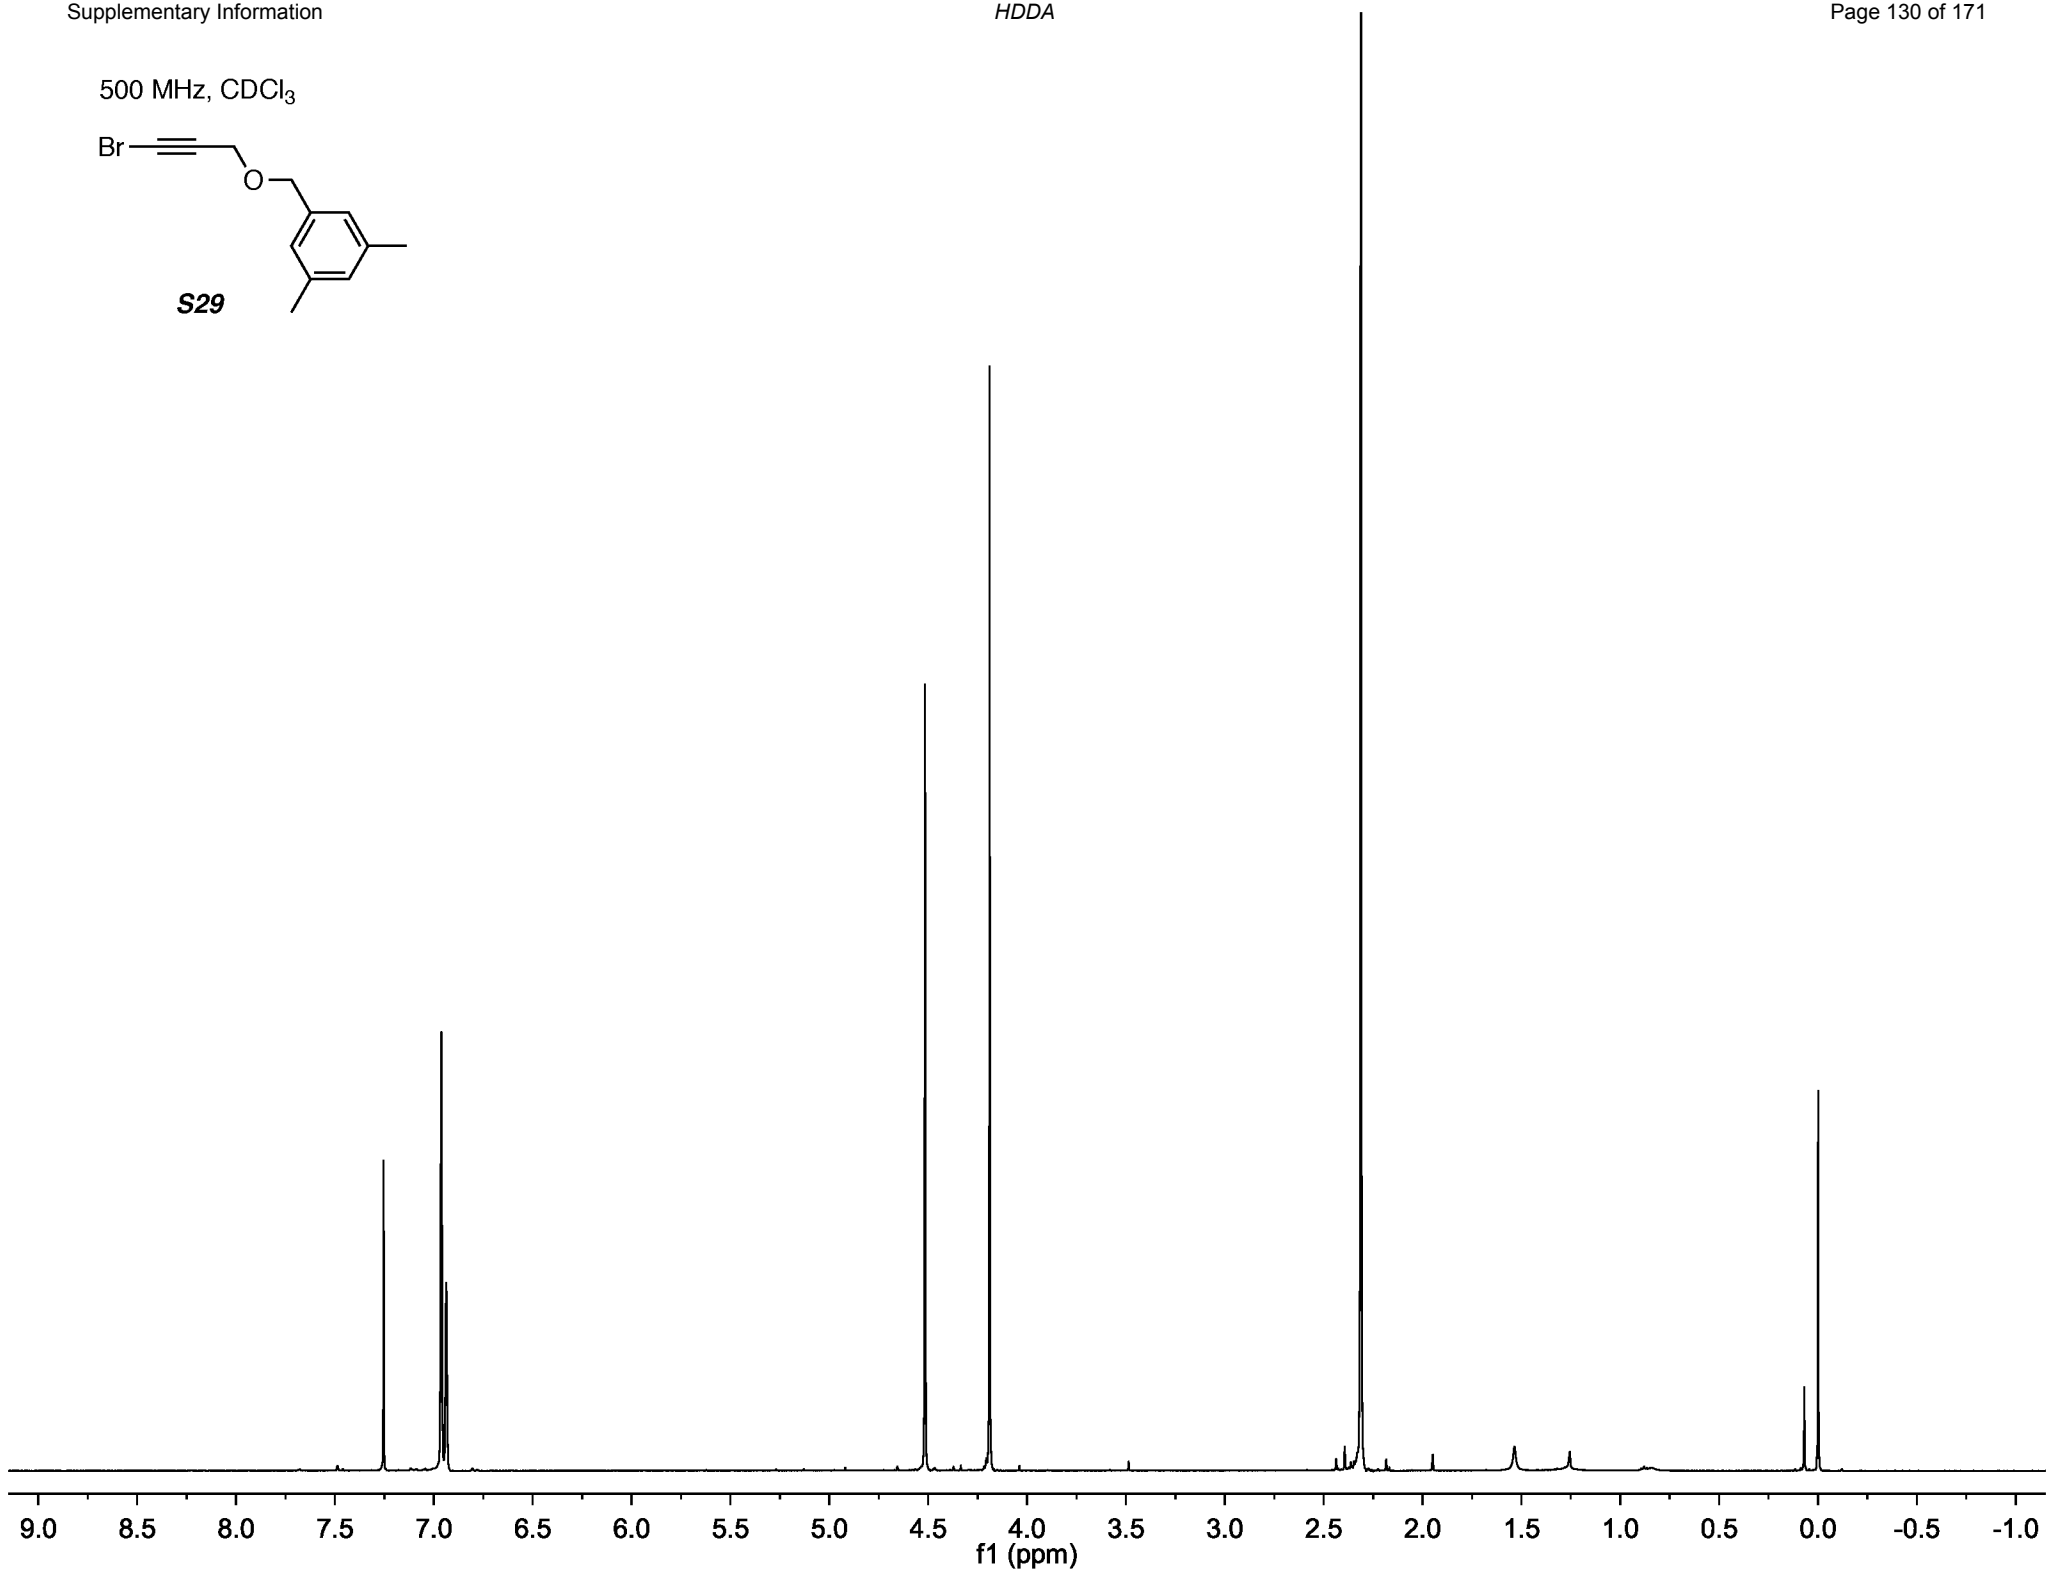

125 MHz, CDCl<sub>3</sub>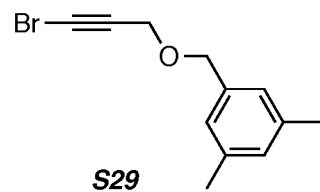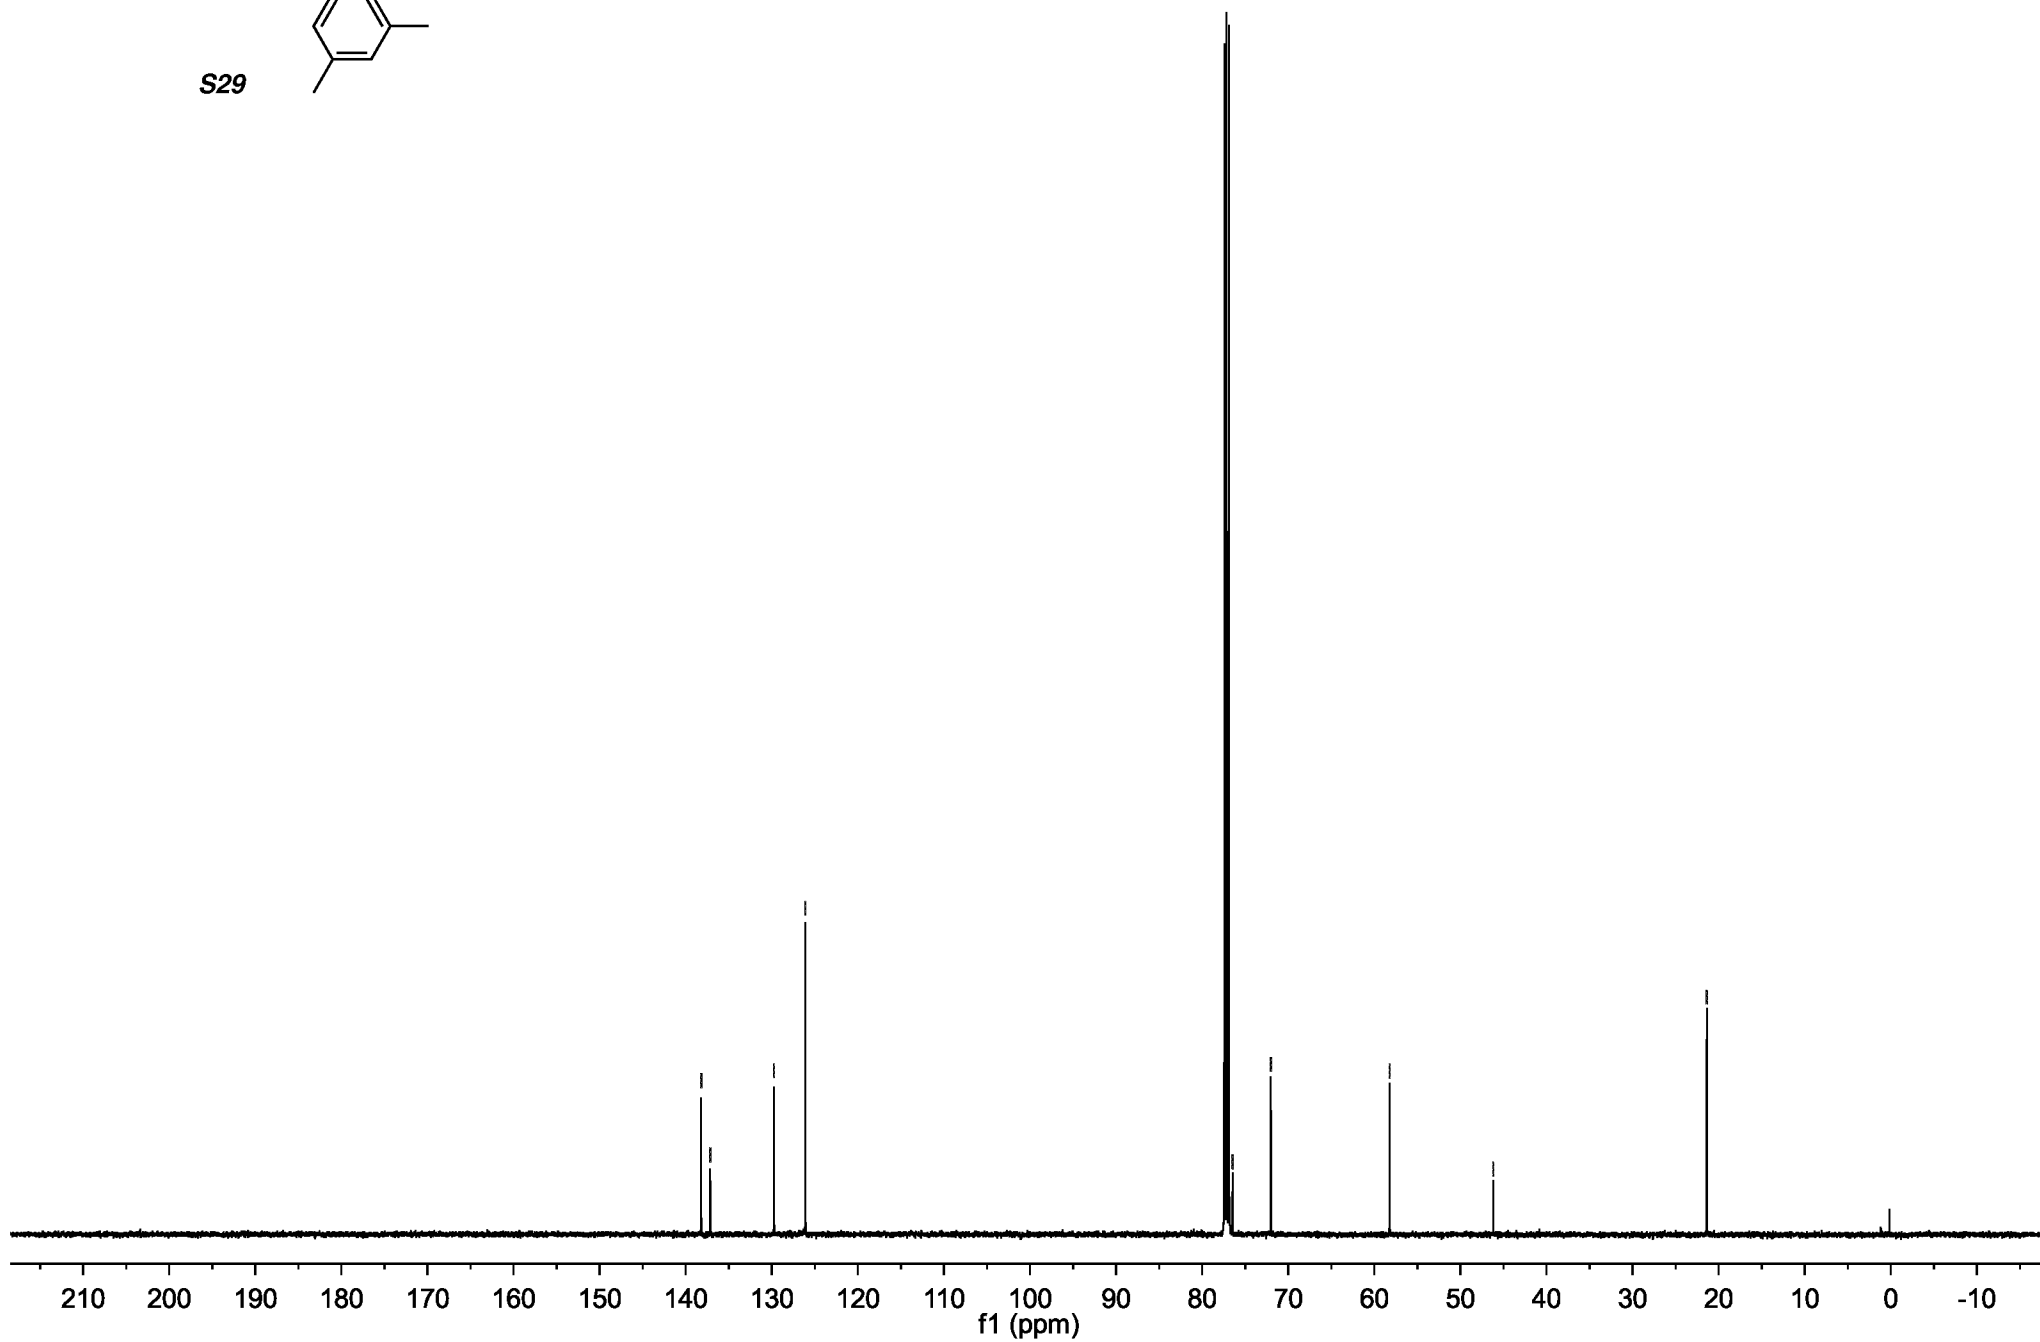

500 MHz, CDCl<sub>3</sub>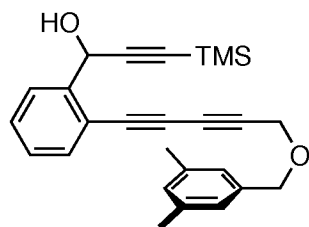**S30**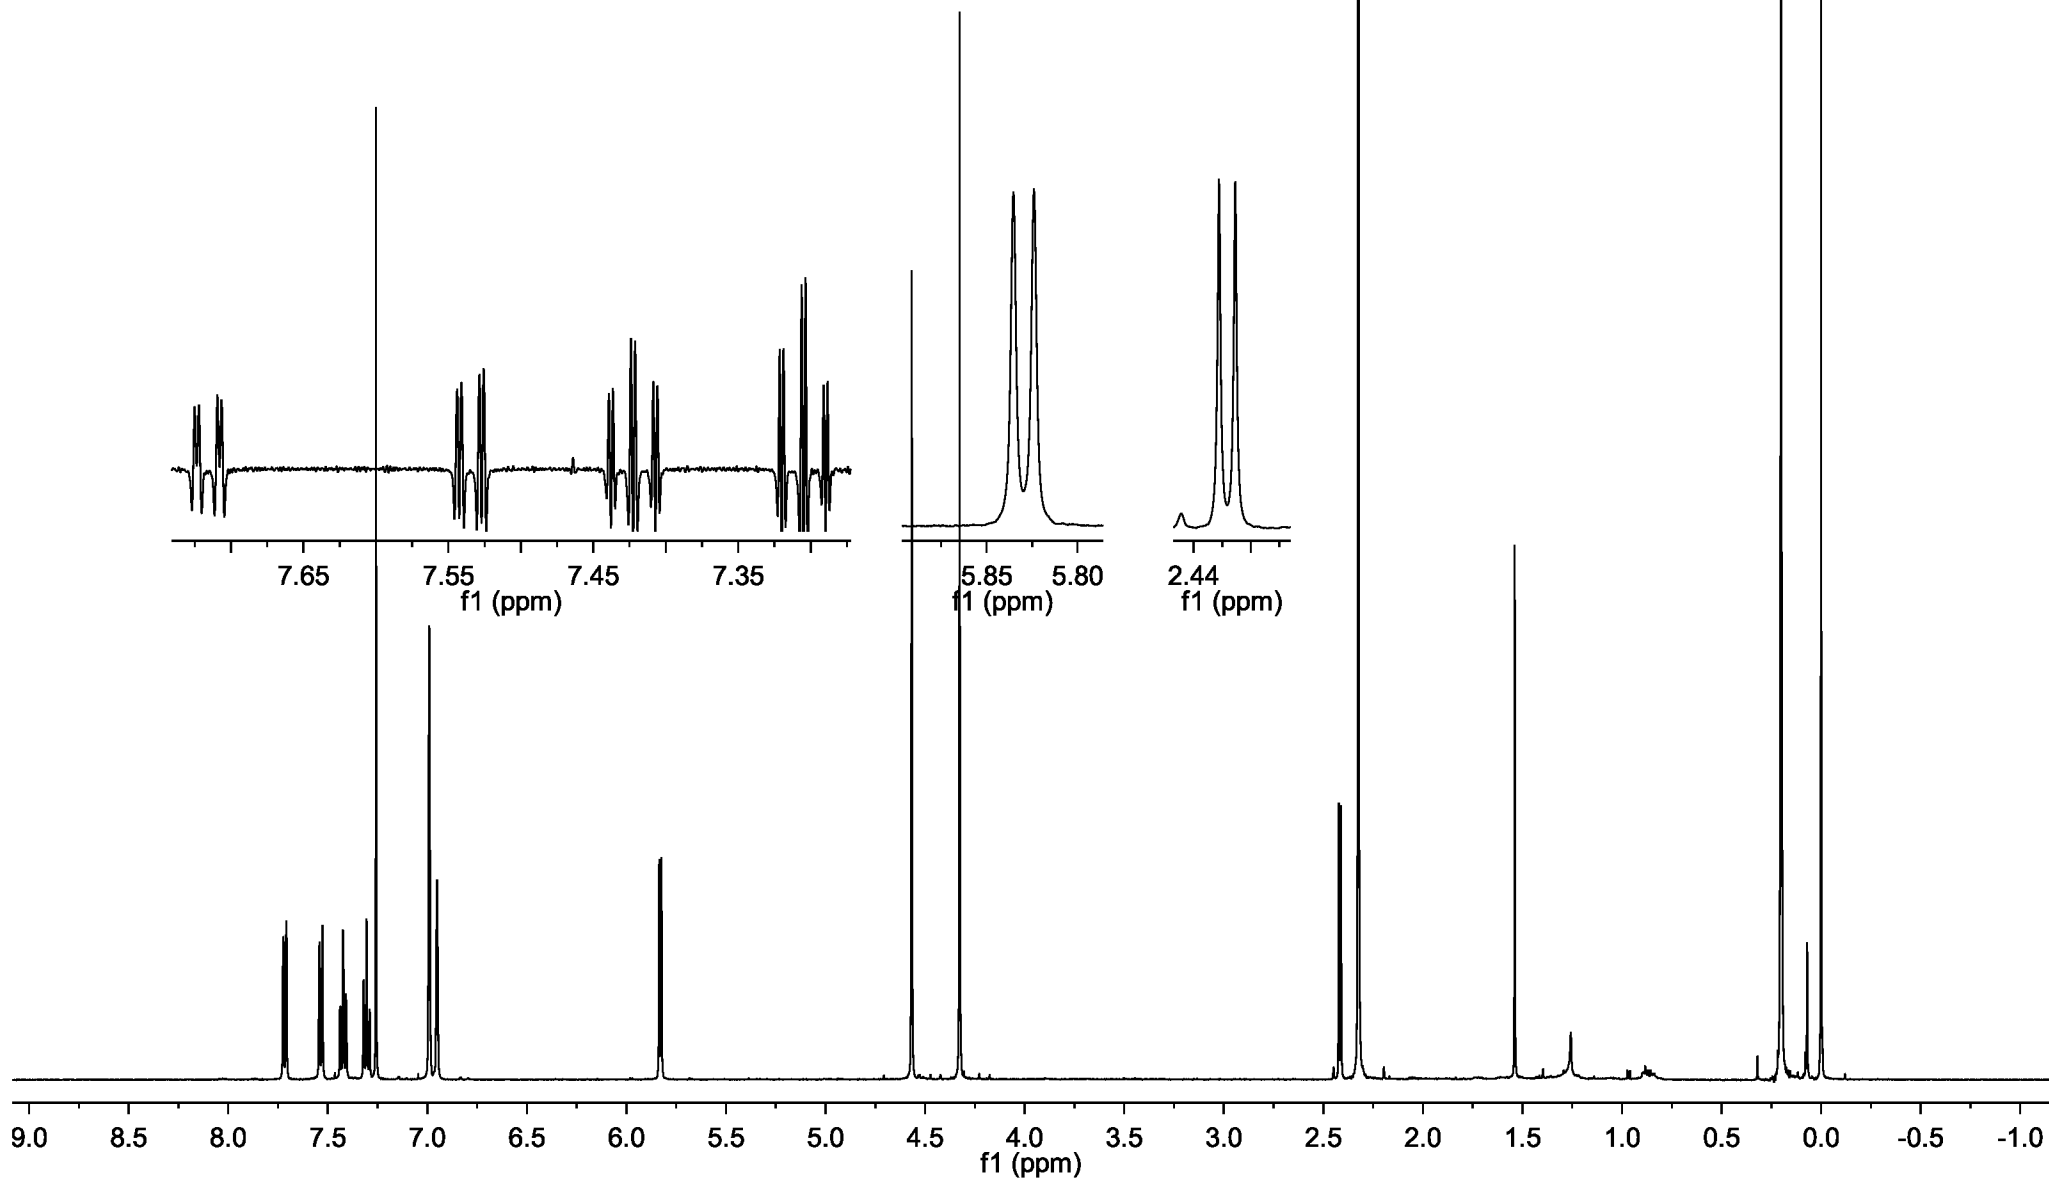

125 MHz, CDCl<sub>3</sub>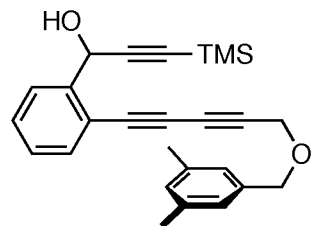**S30**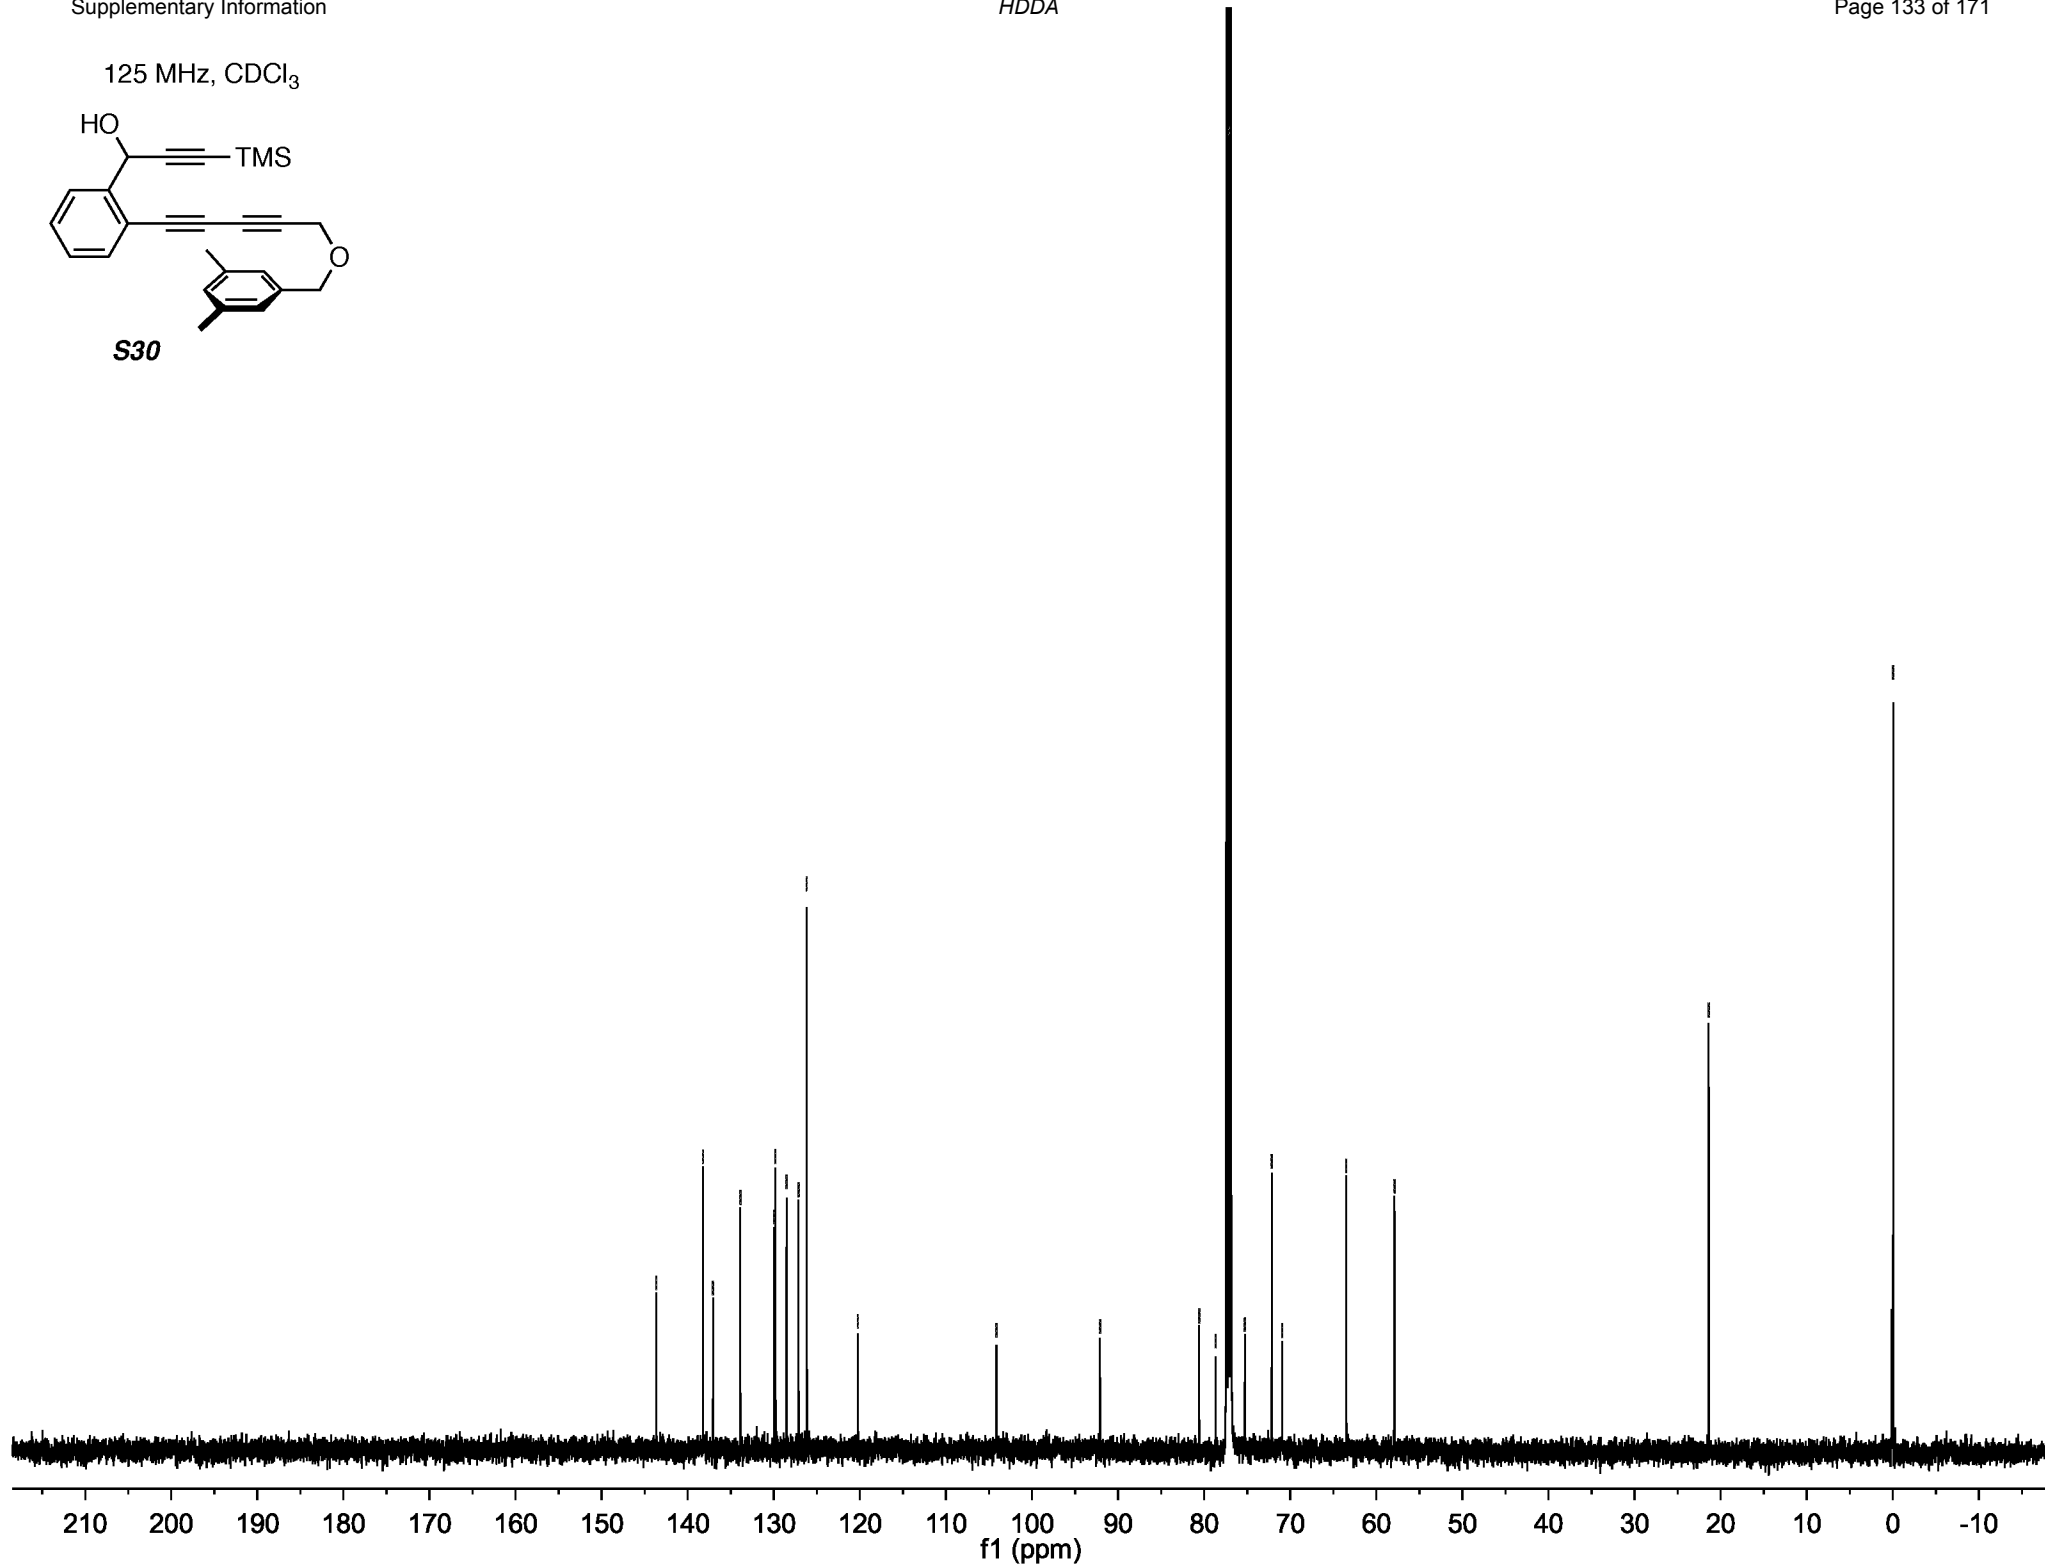

500 MHz, CDCl<sub>3</sub>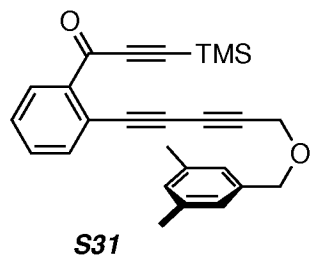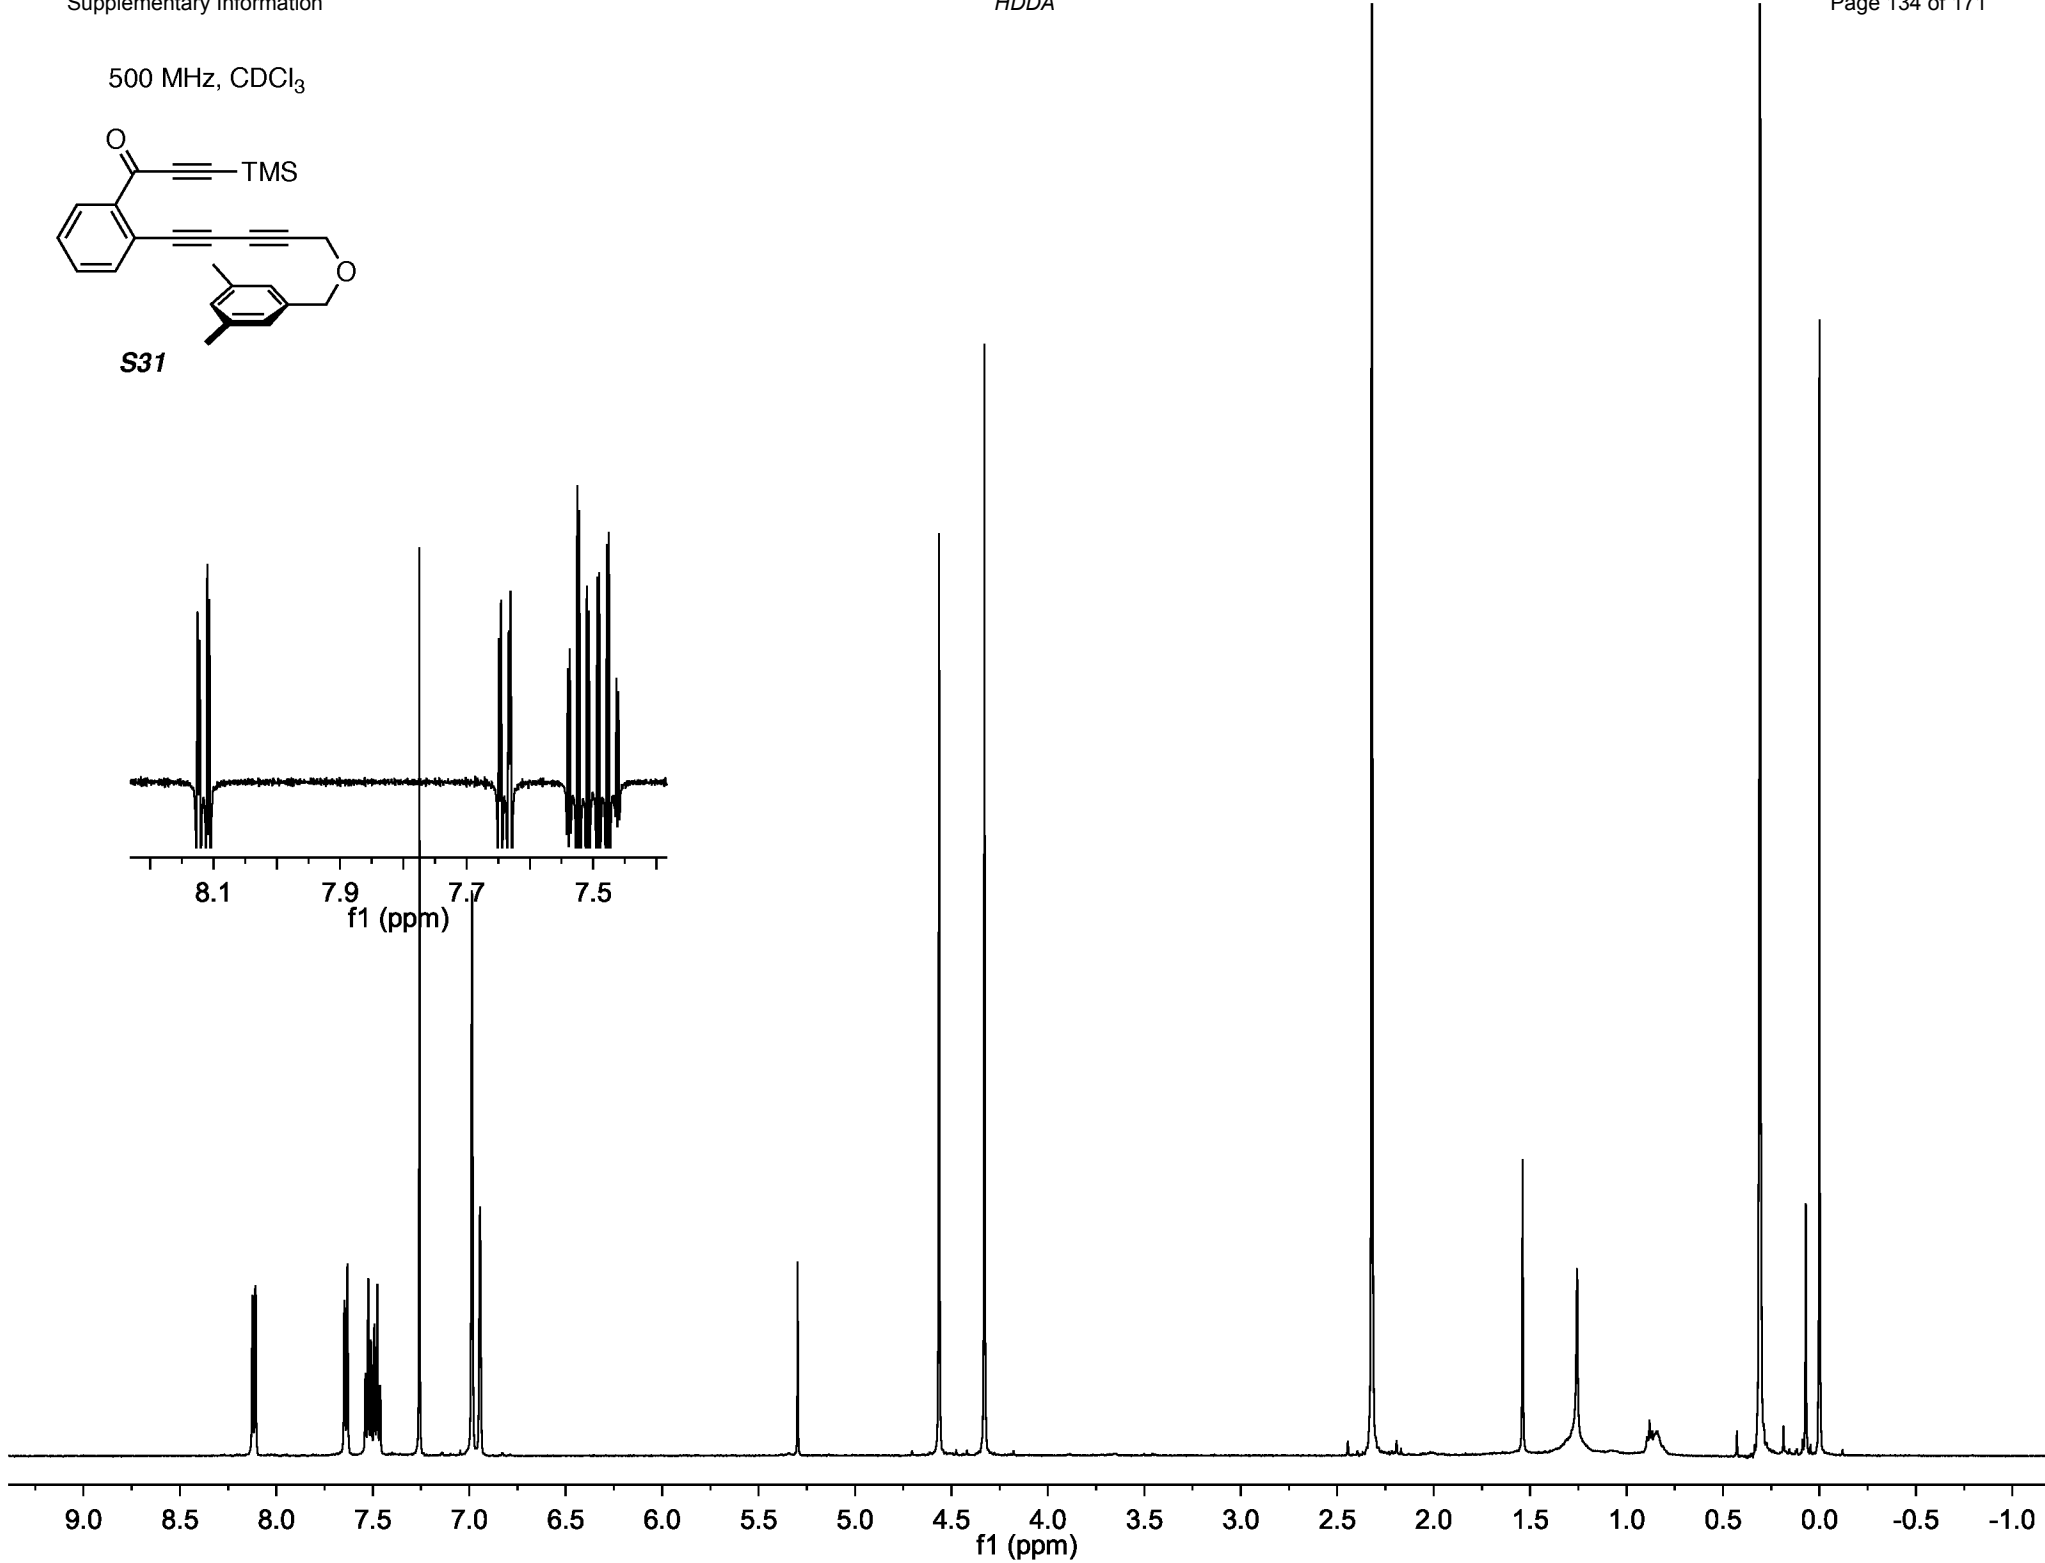

125 MHz, CDCl<sub>3</sub>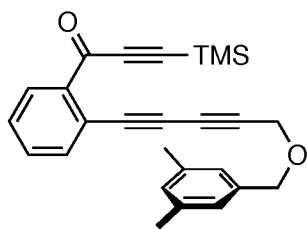**S31**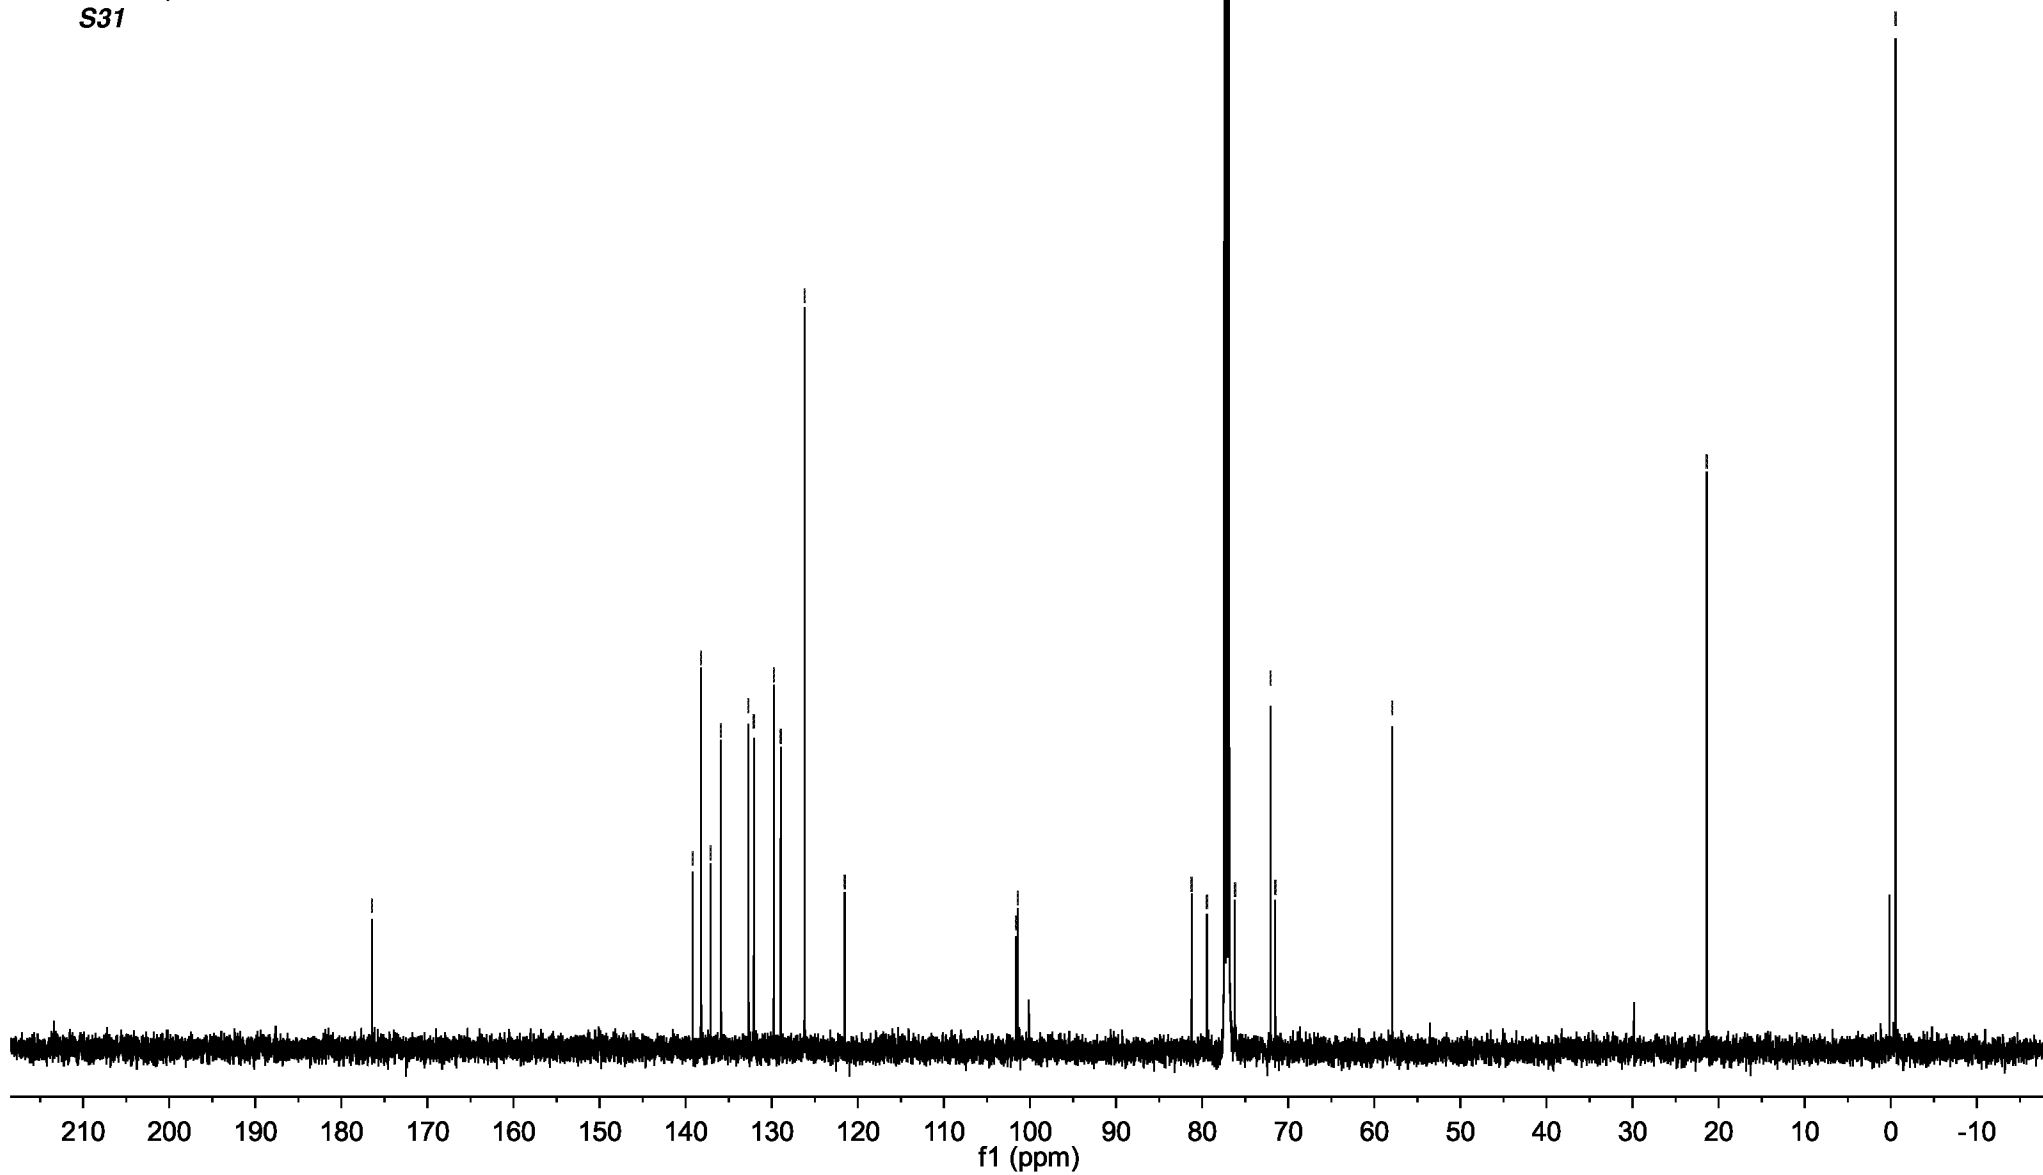

500 MHz, CDCl<sub>3</sub>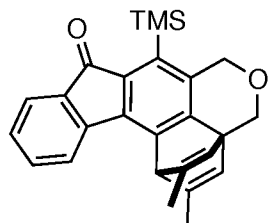**S32**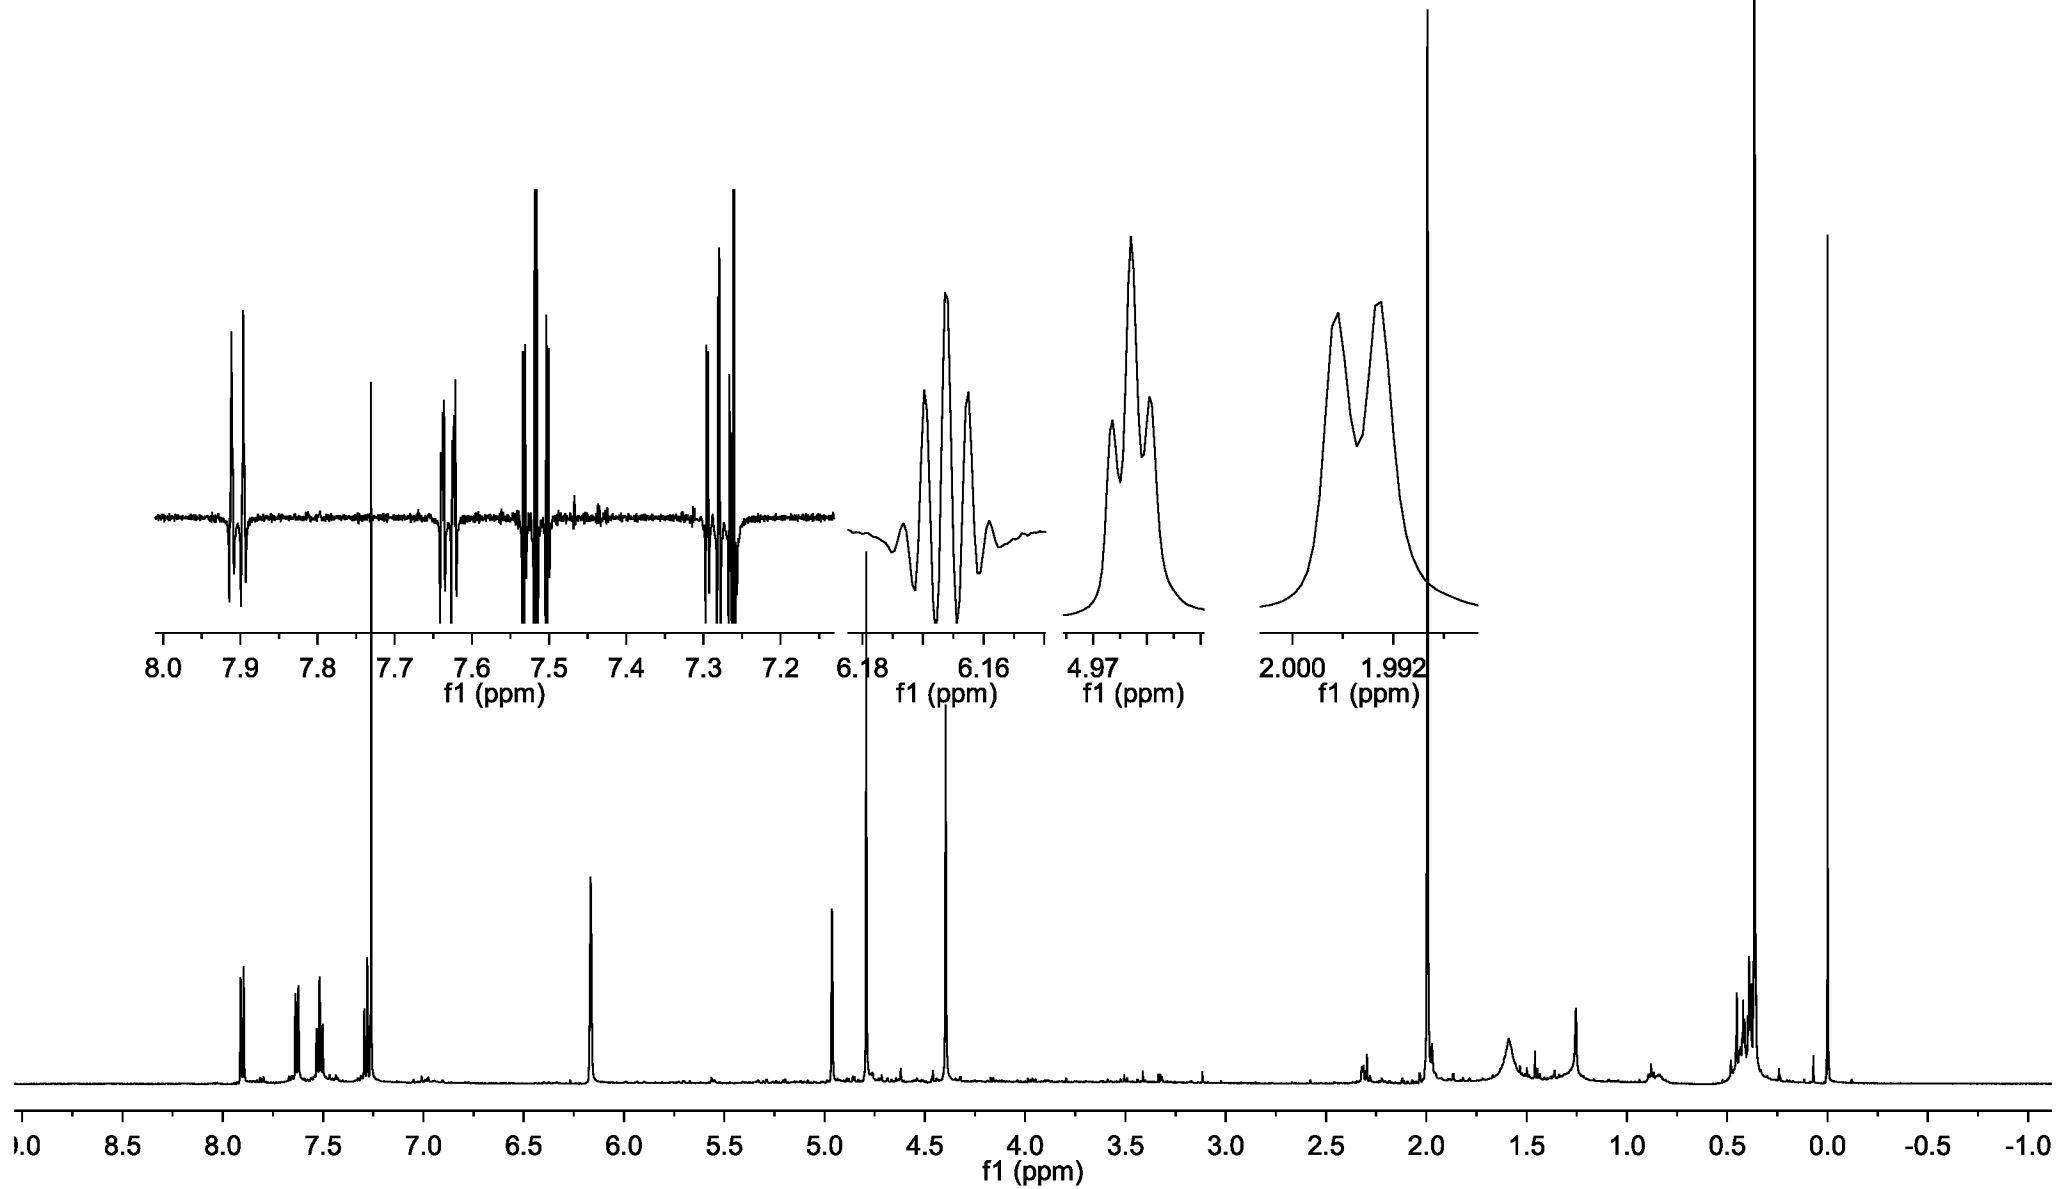



125 MHz, CDCl<sub>3</sub>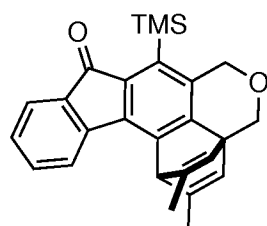**S32**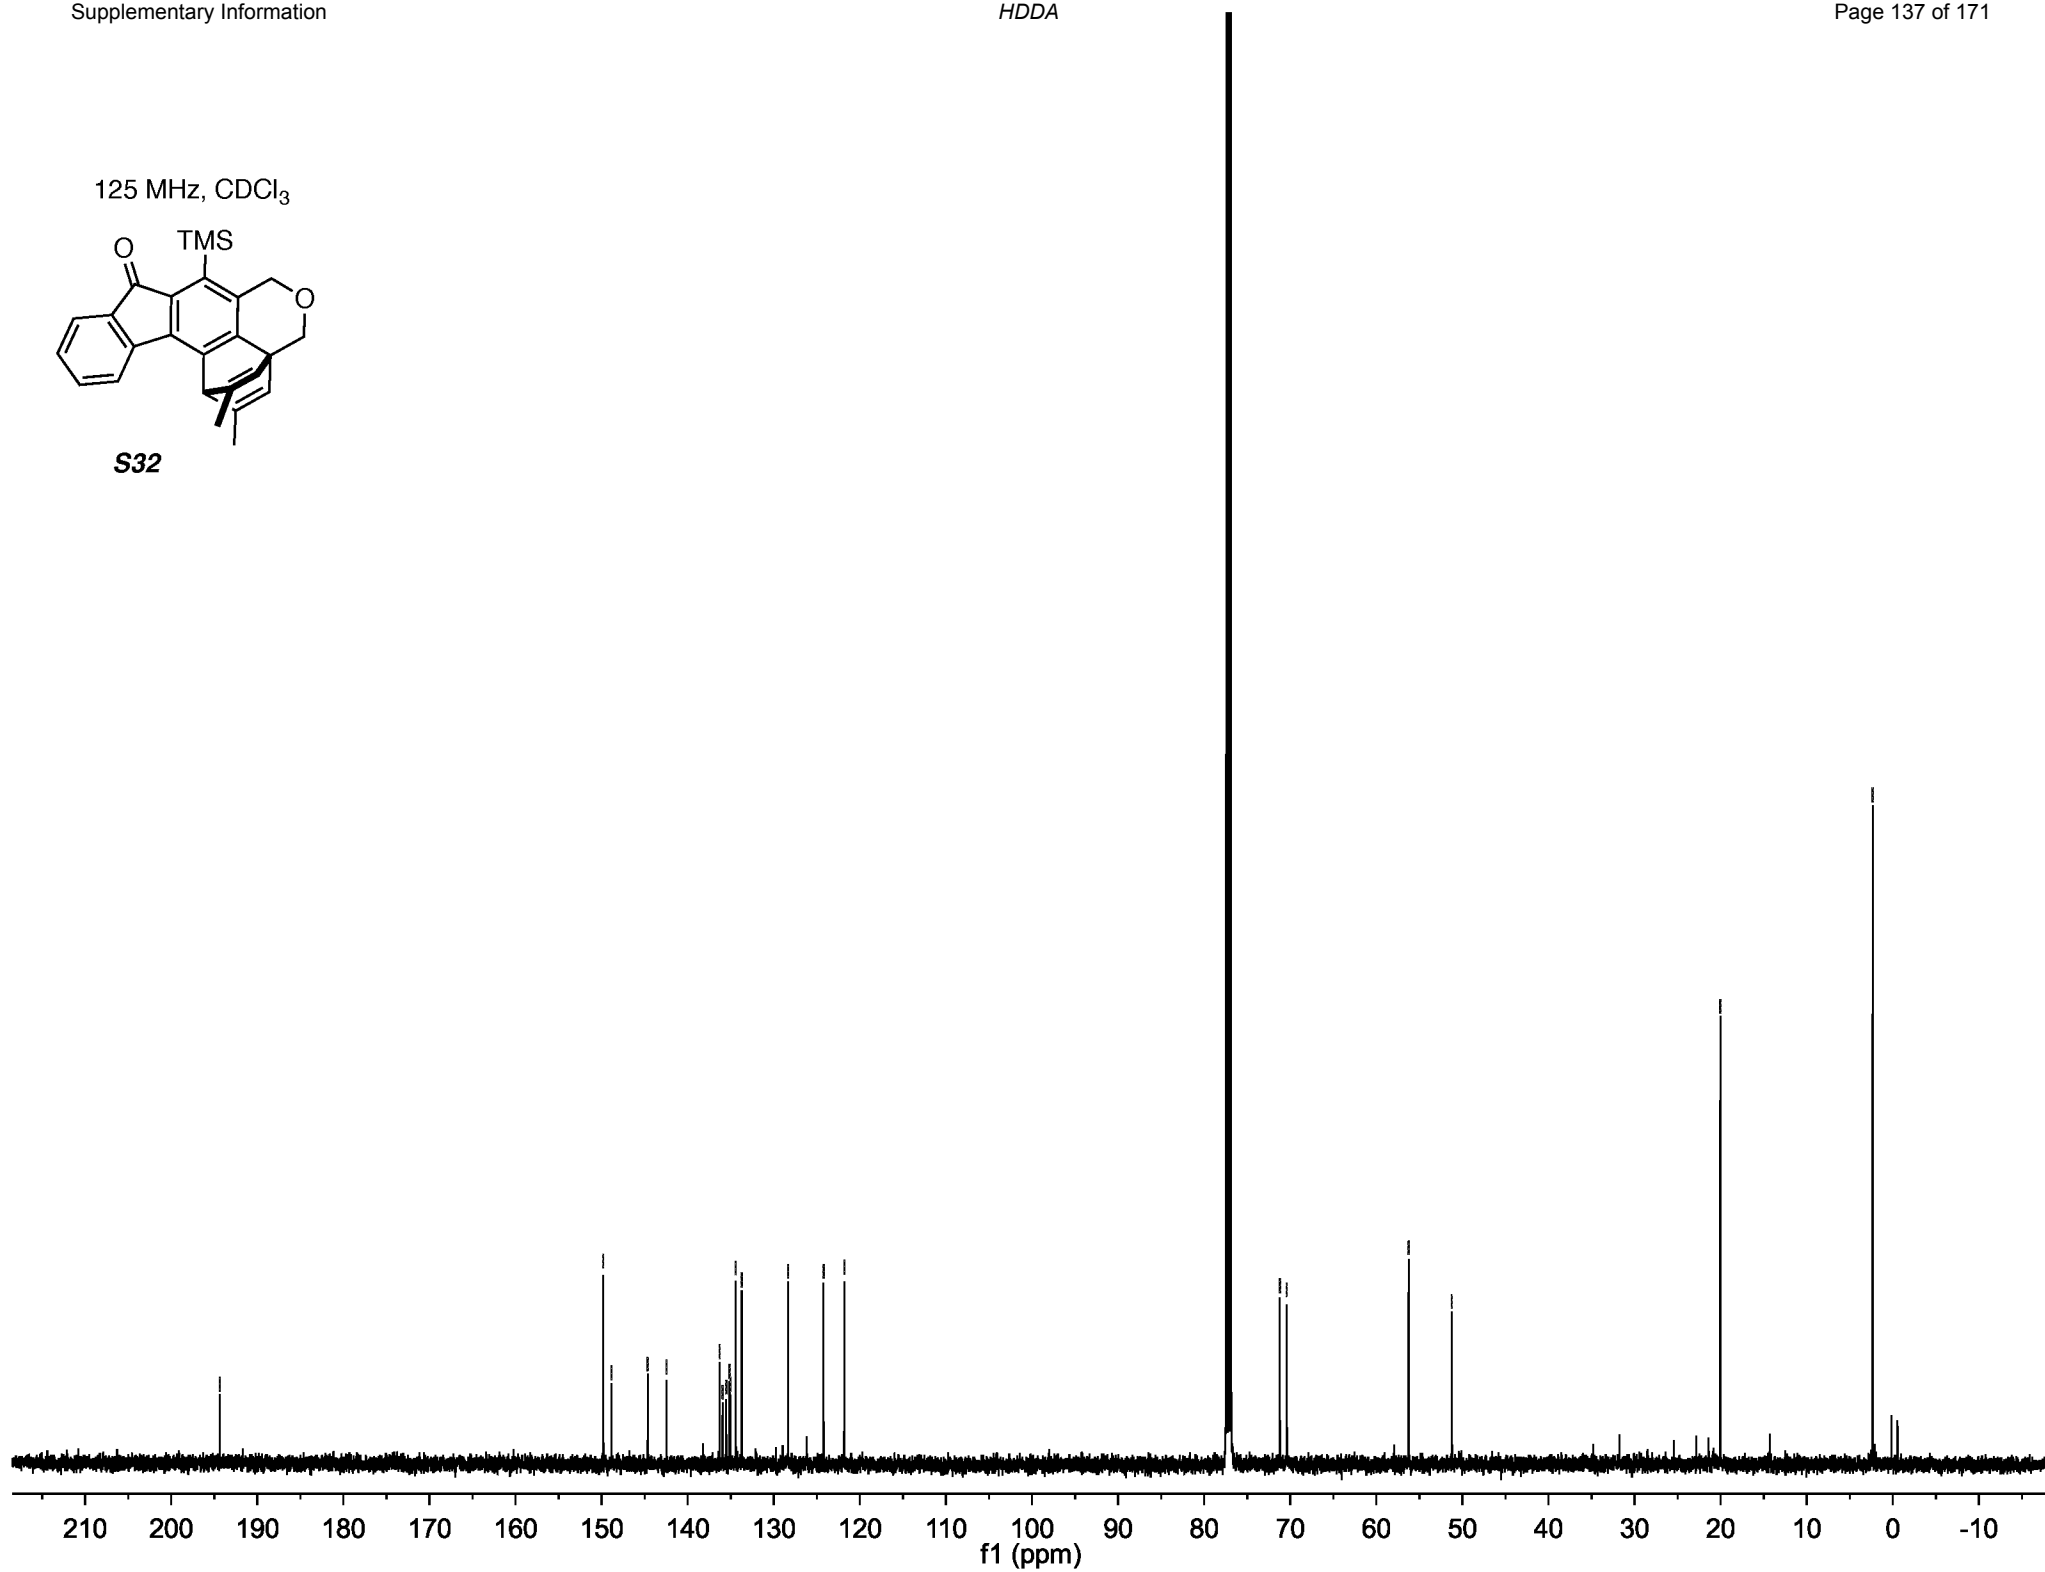

500 MHz, CDCl<sub>3</sub>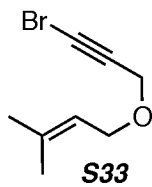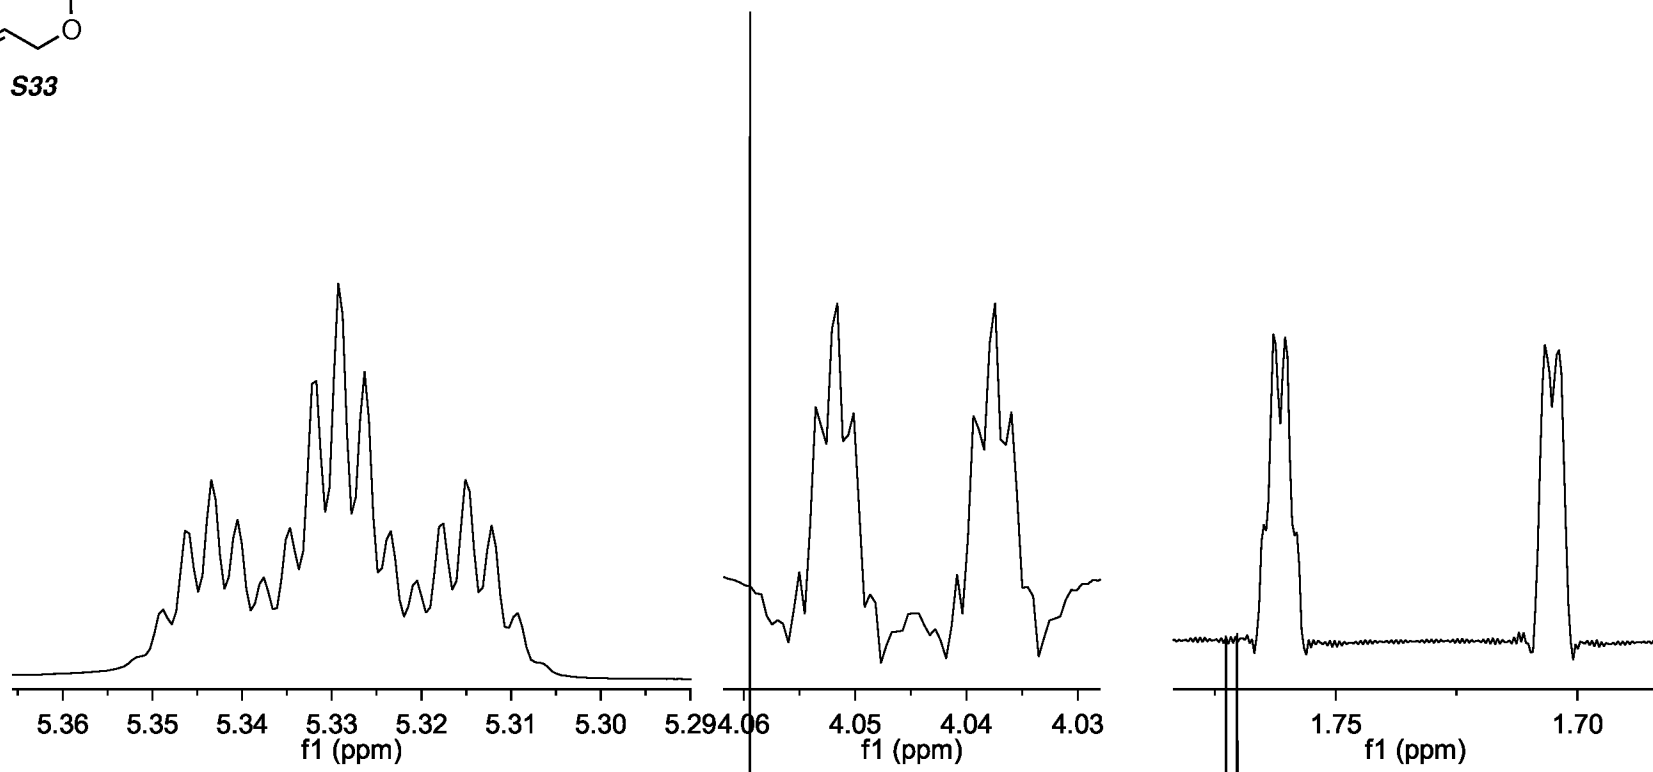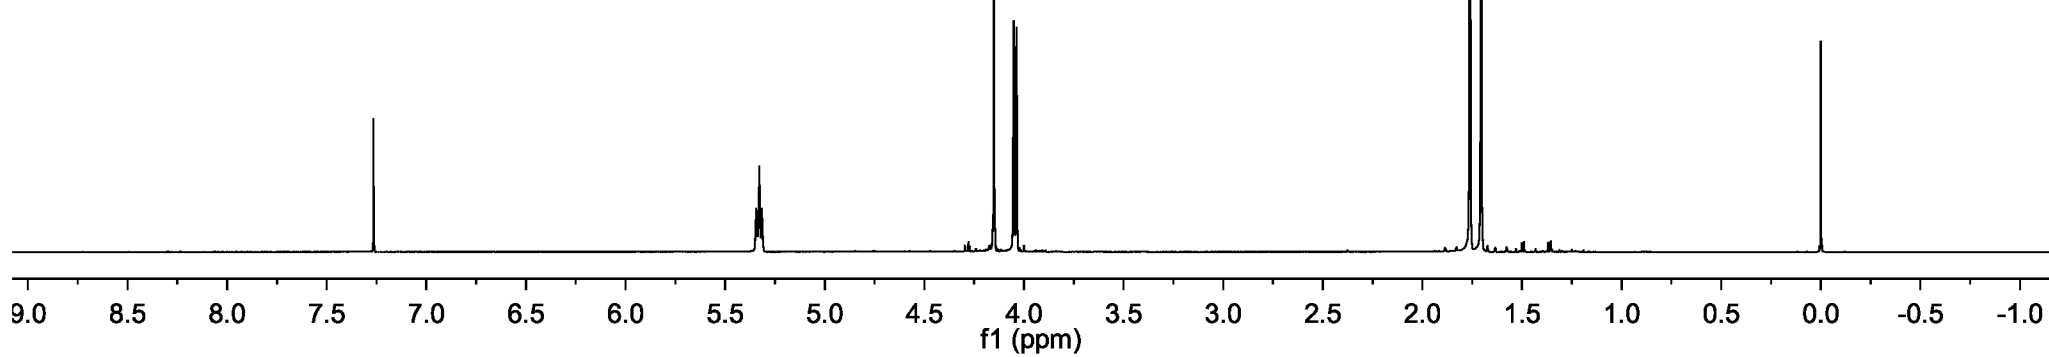

125 MHz, CDCl<sub>3</sub>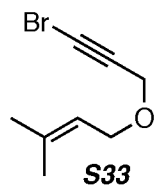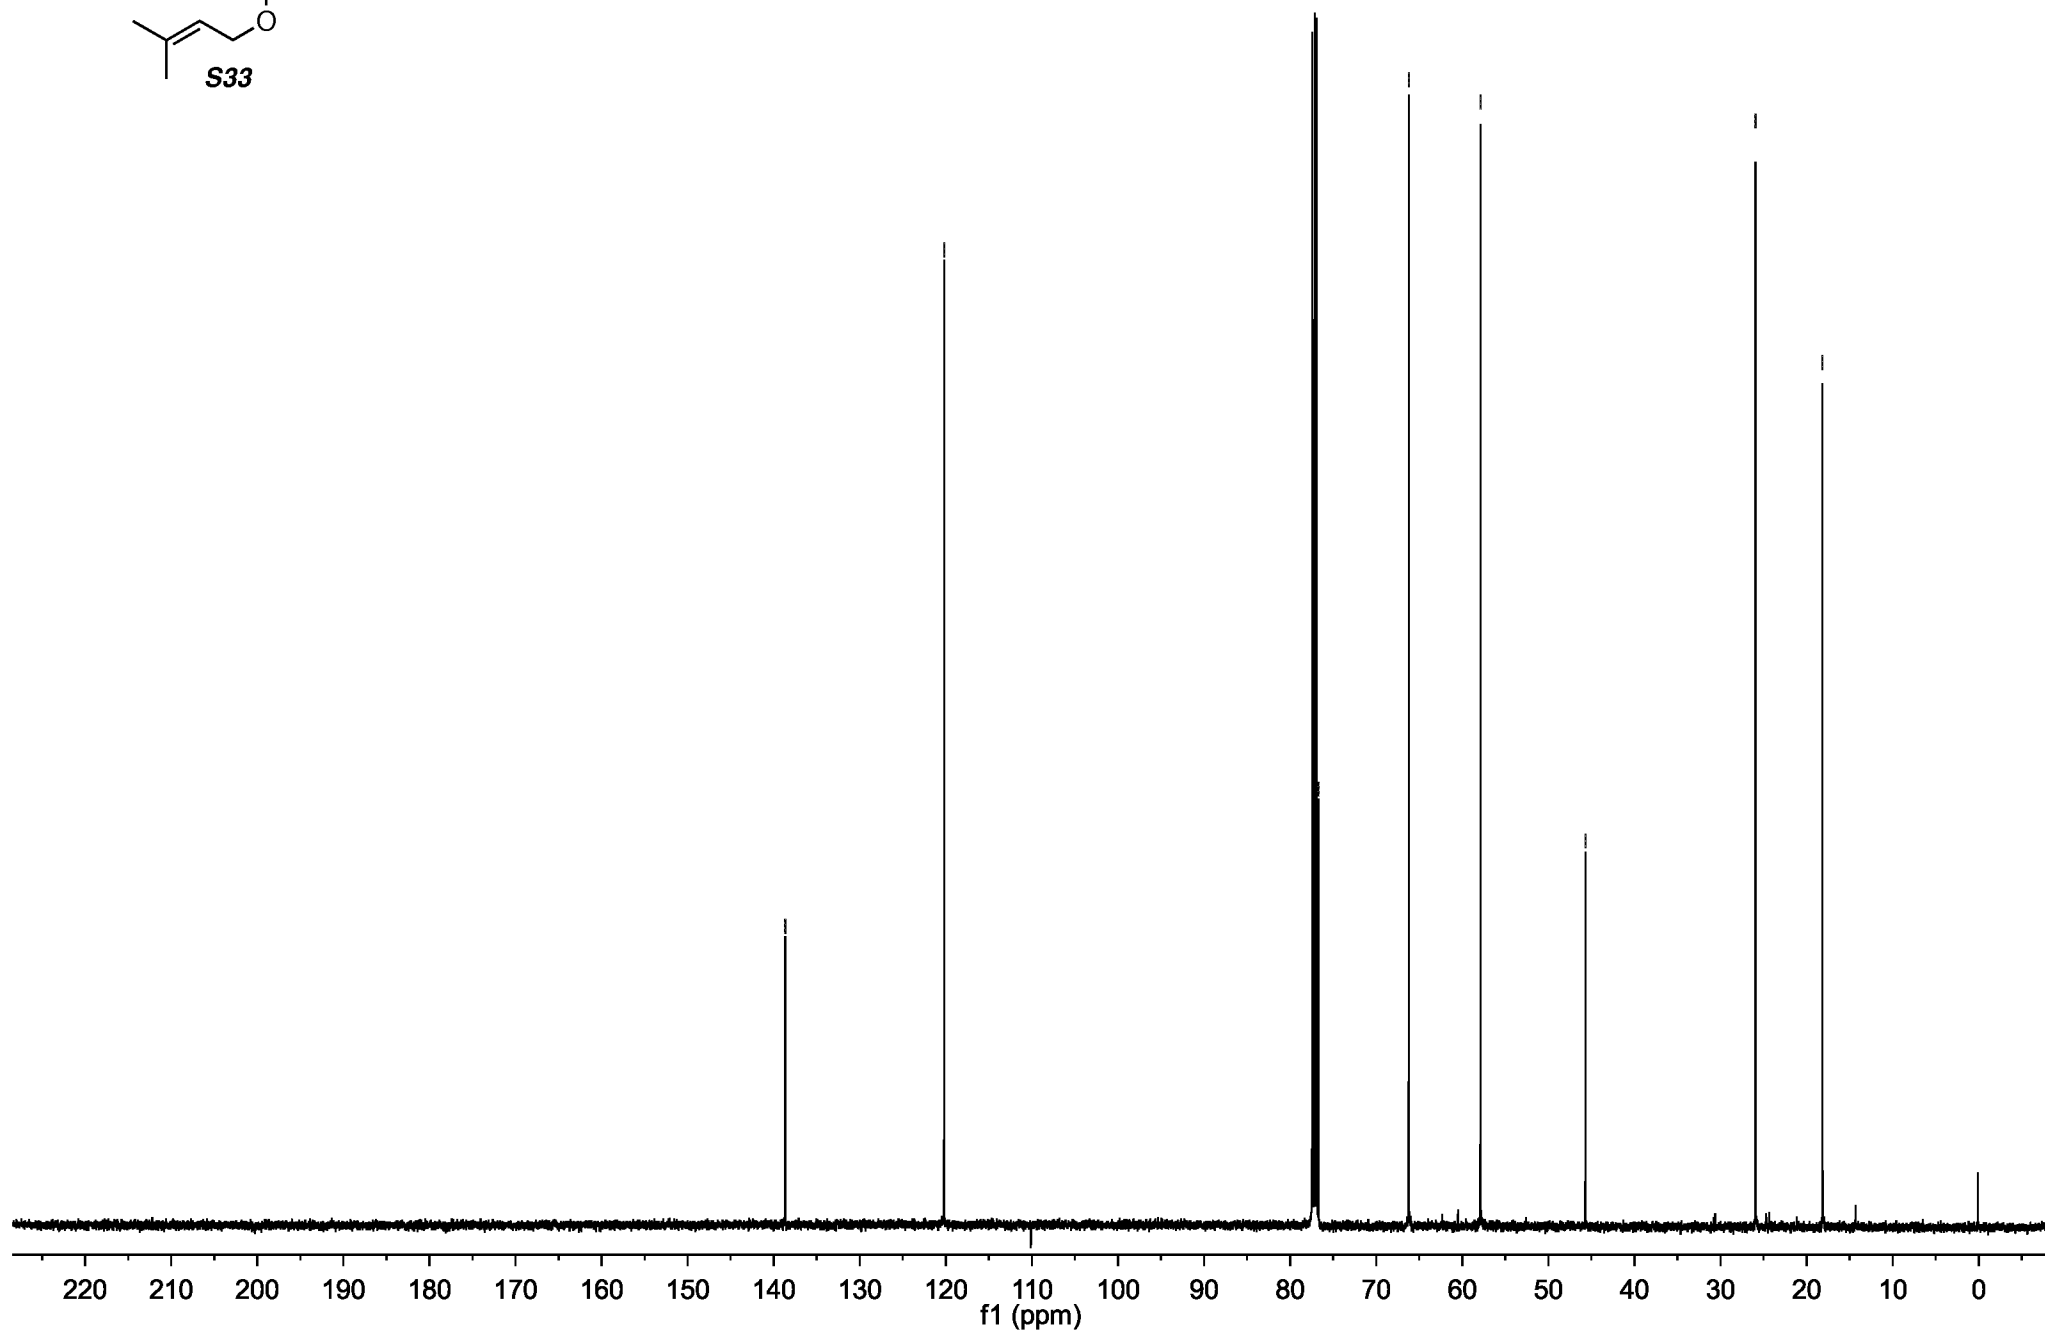

500 MHz, CDCl<sub>3</sub>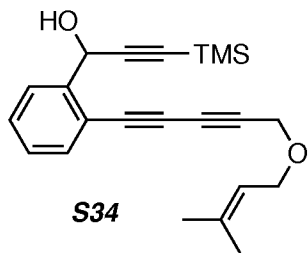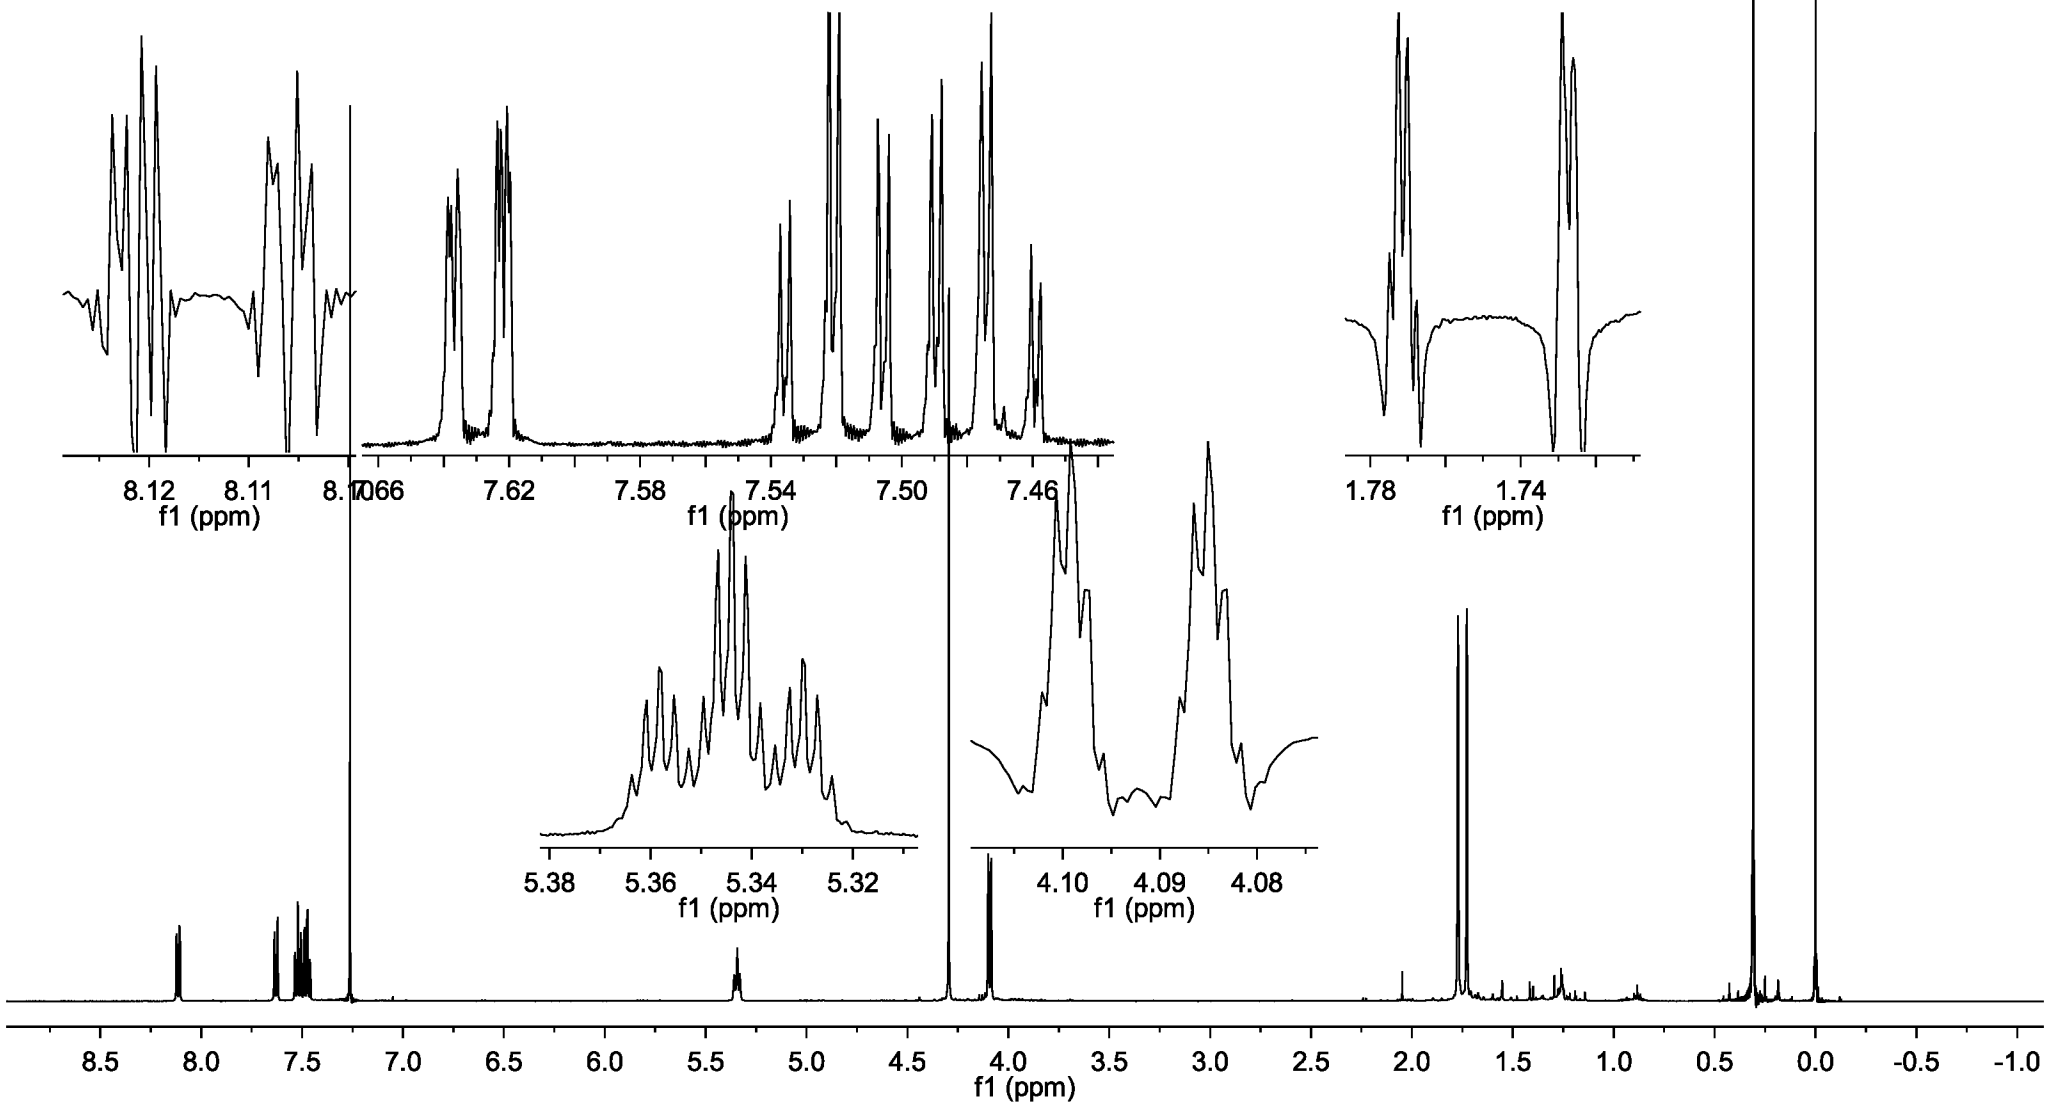

125 MHz, CDCl<sub>3</sub>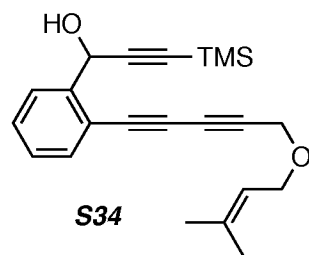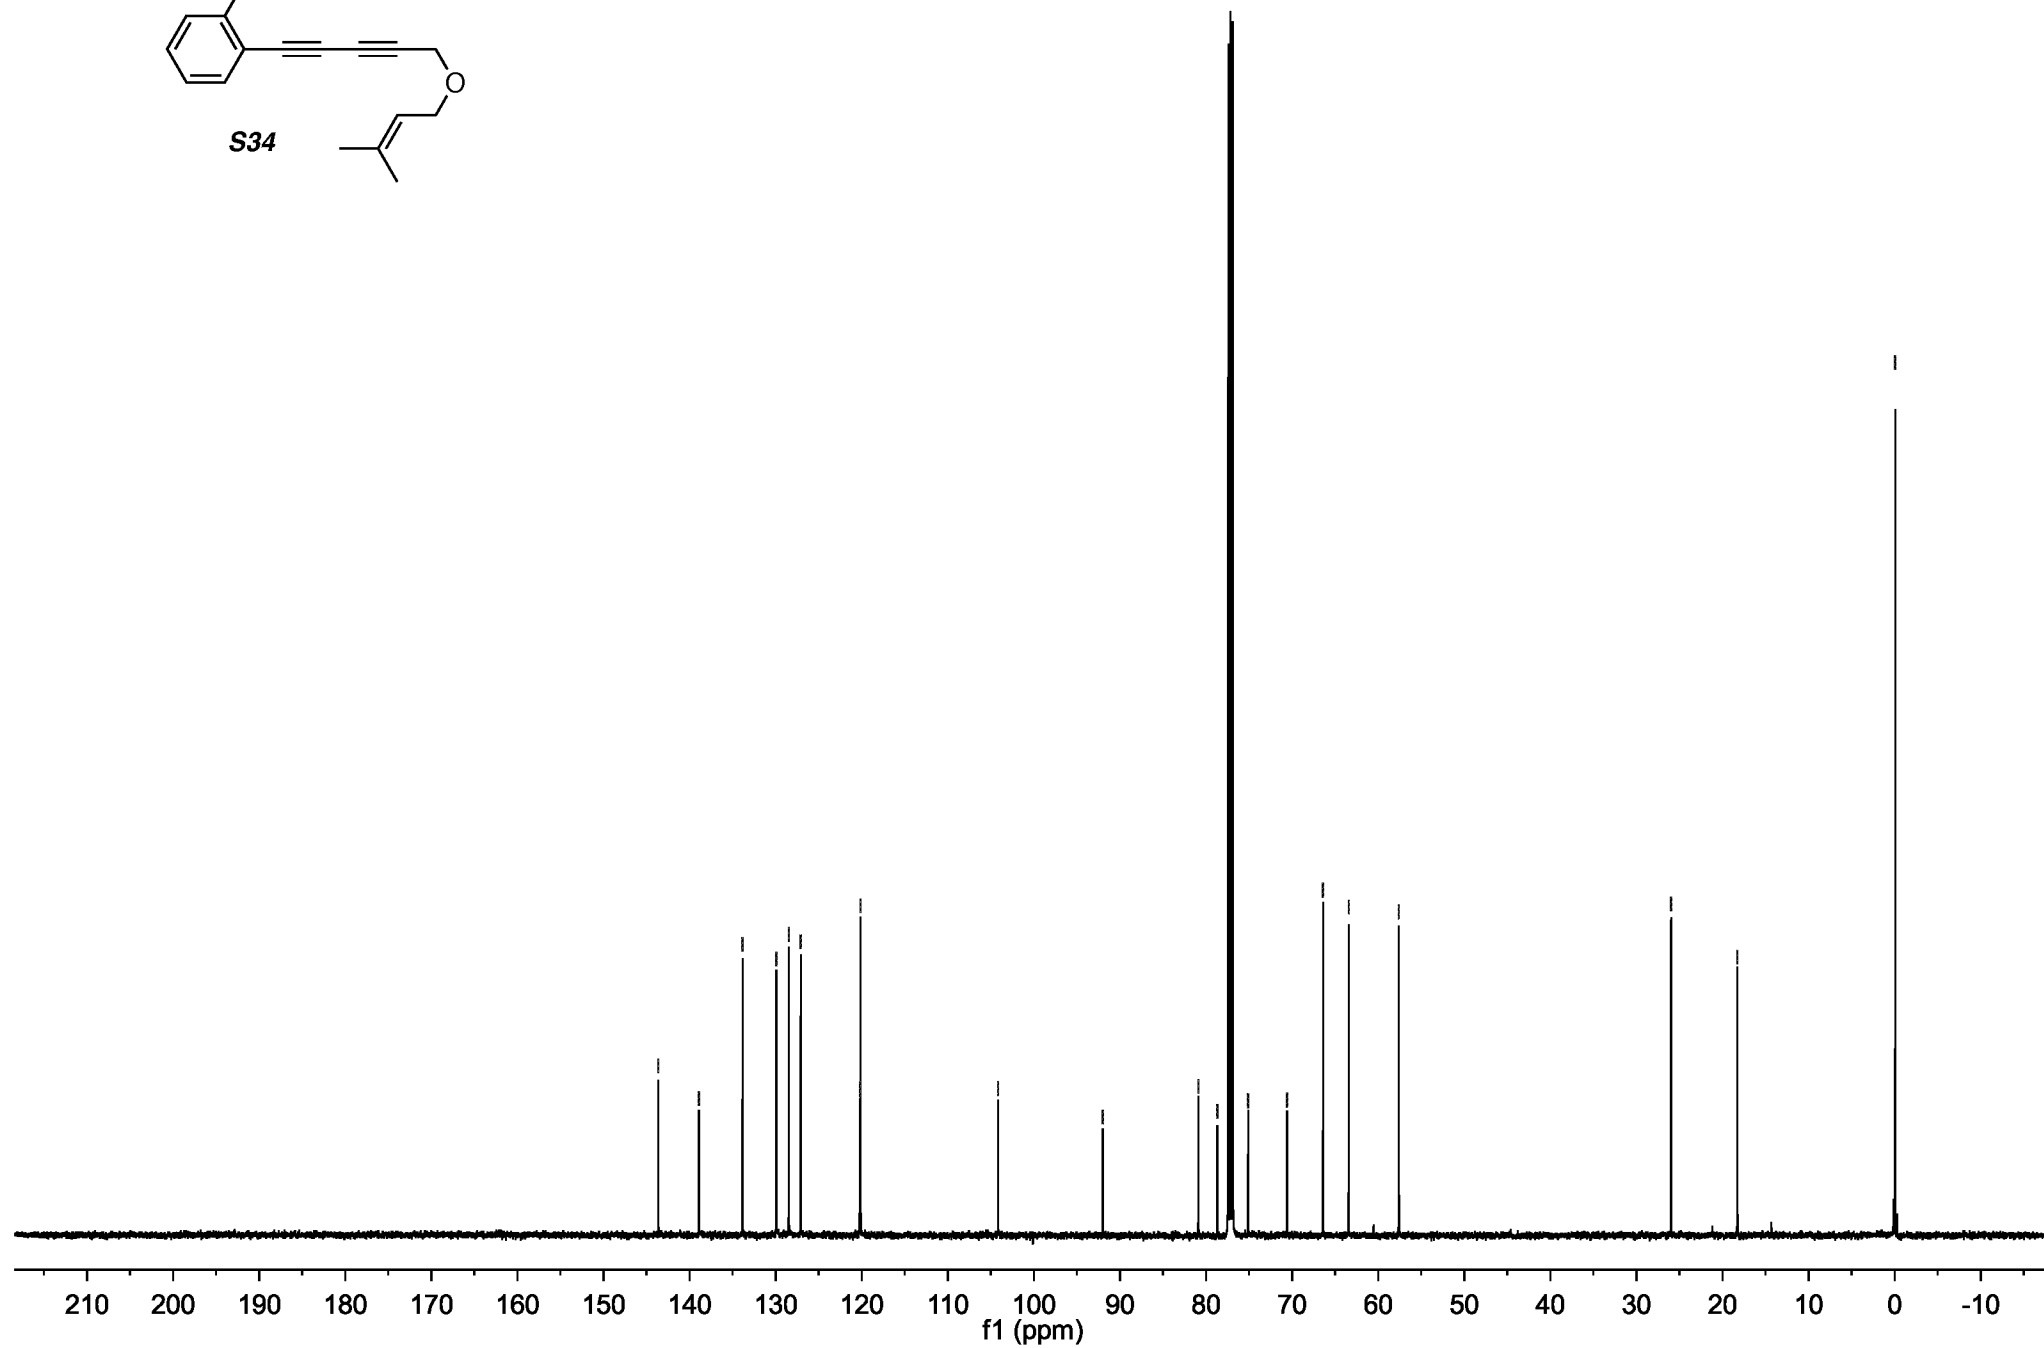

500 MHz, CDCl<sub>3</sub>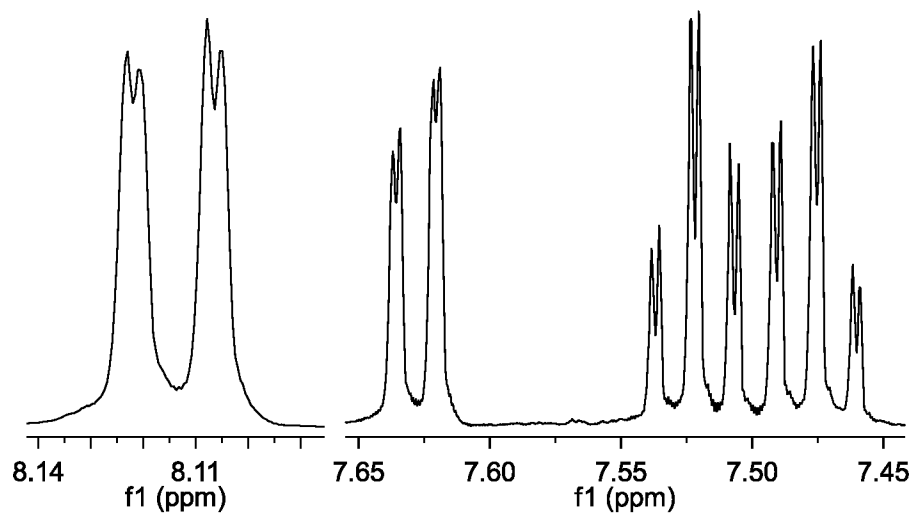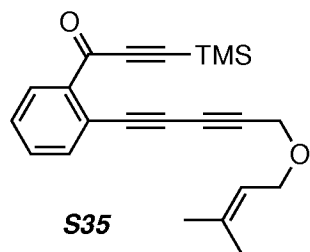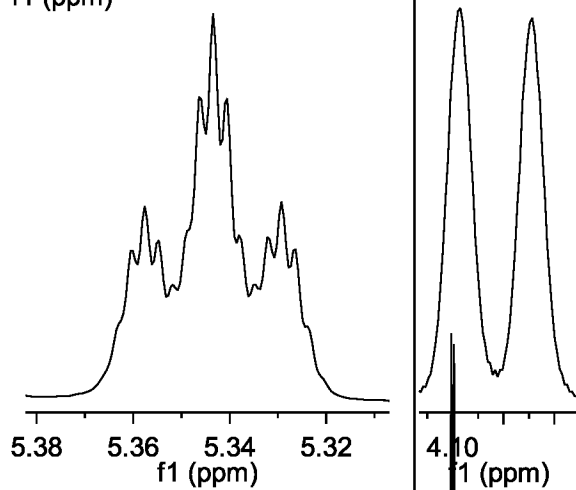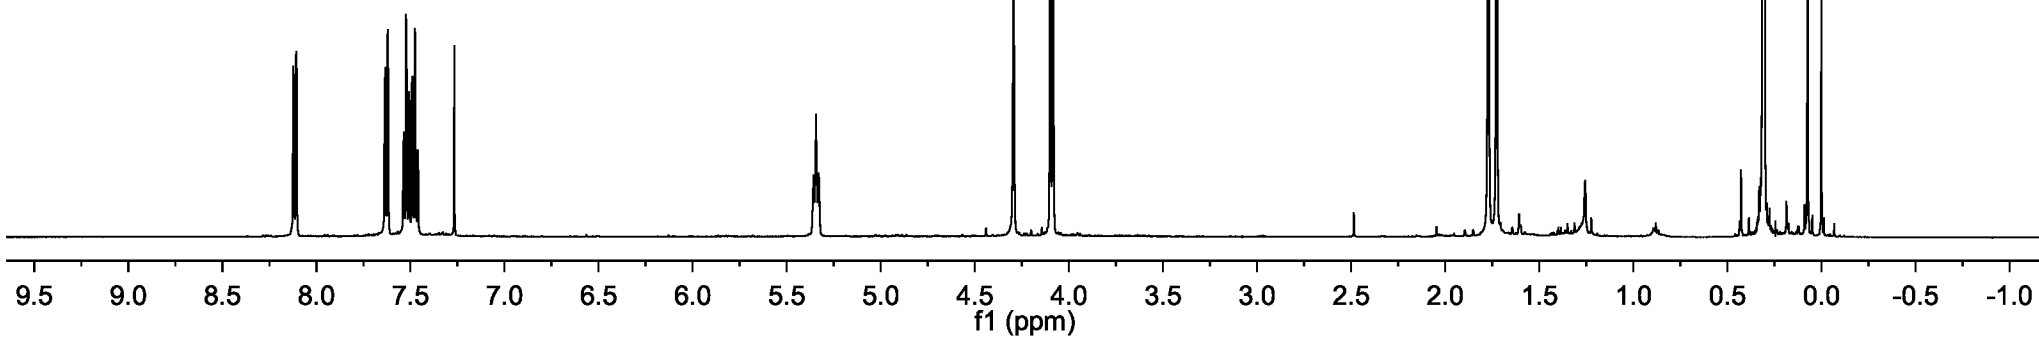

125 MHz, CDCl<sub>3</sub>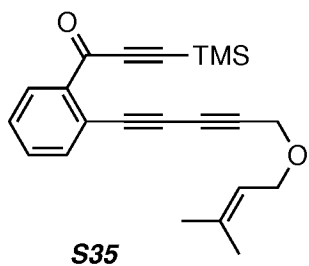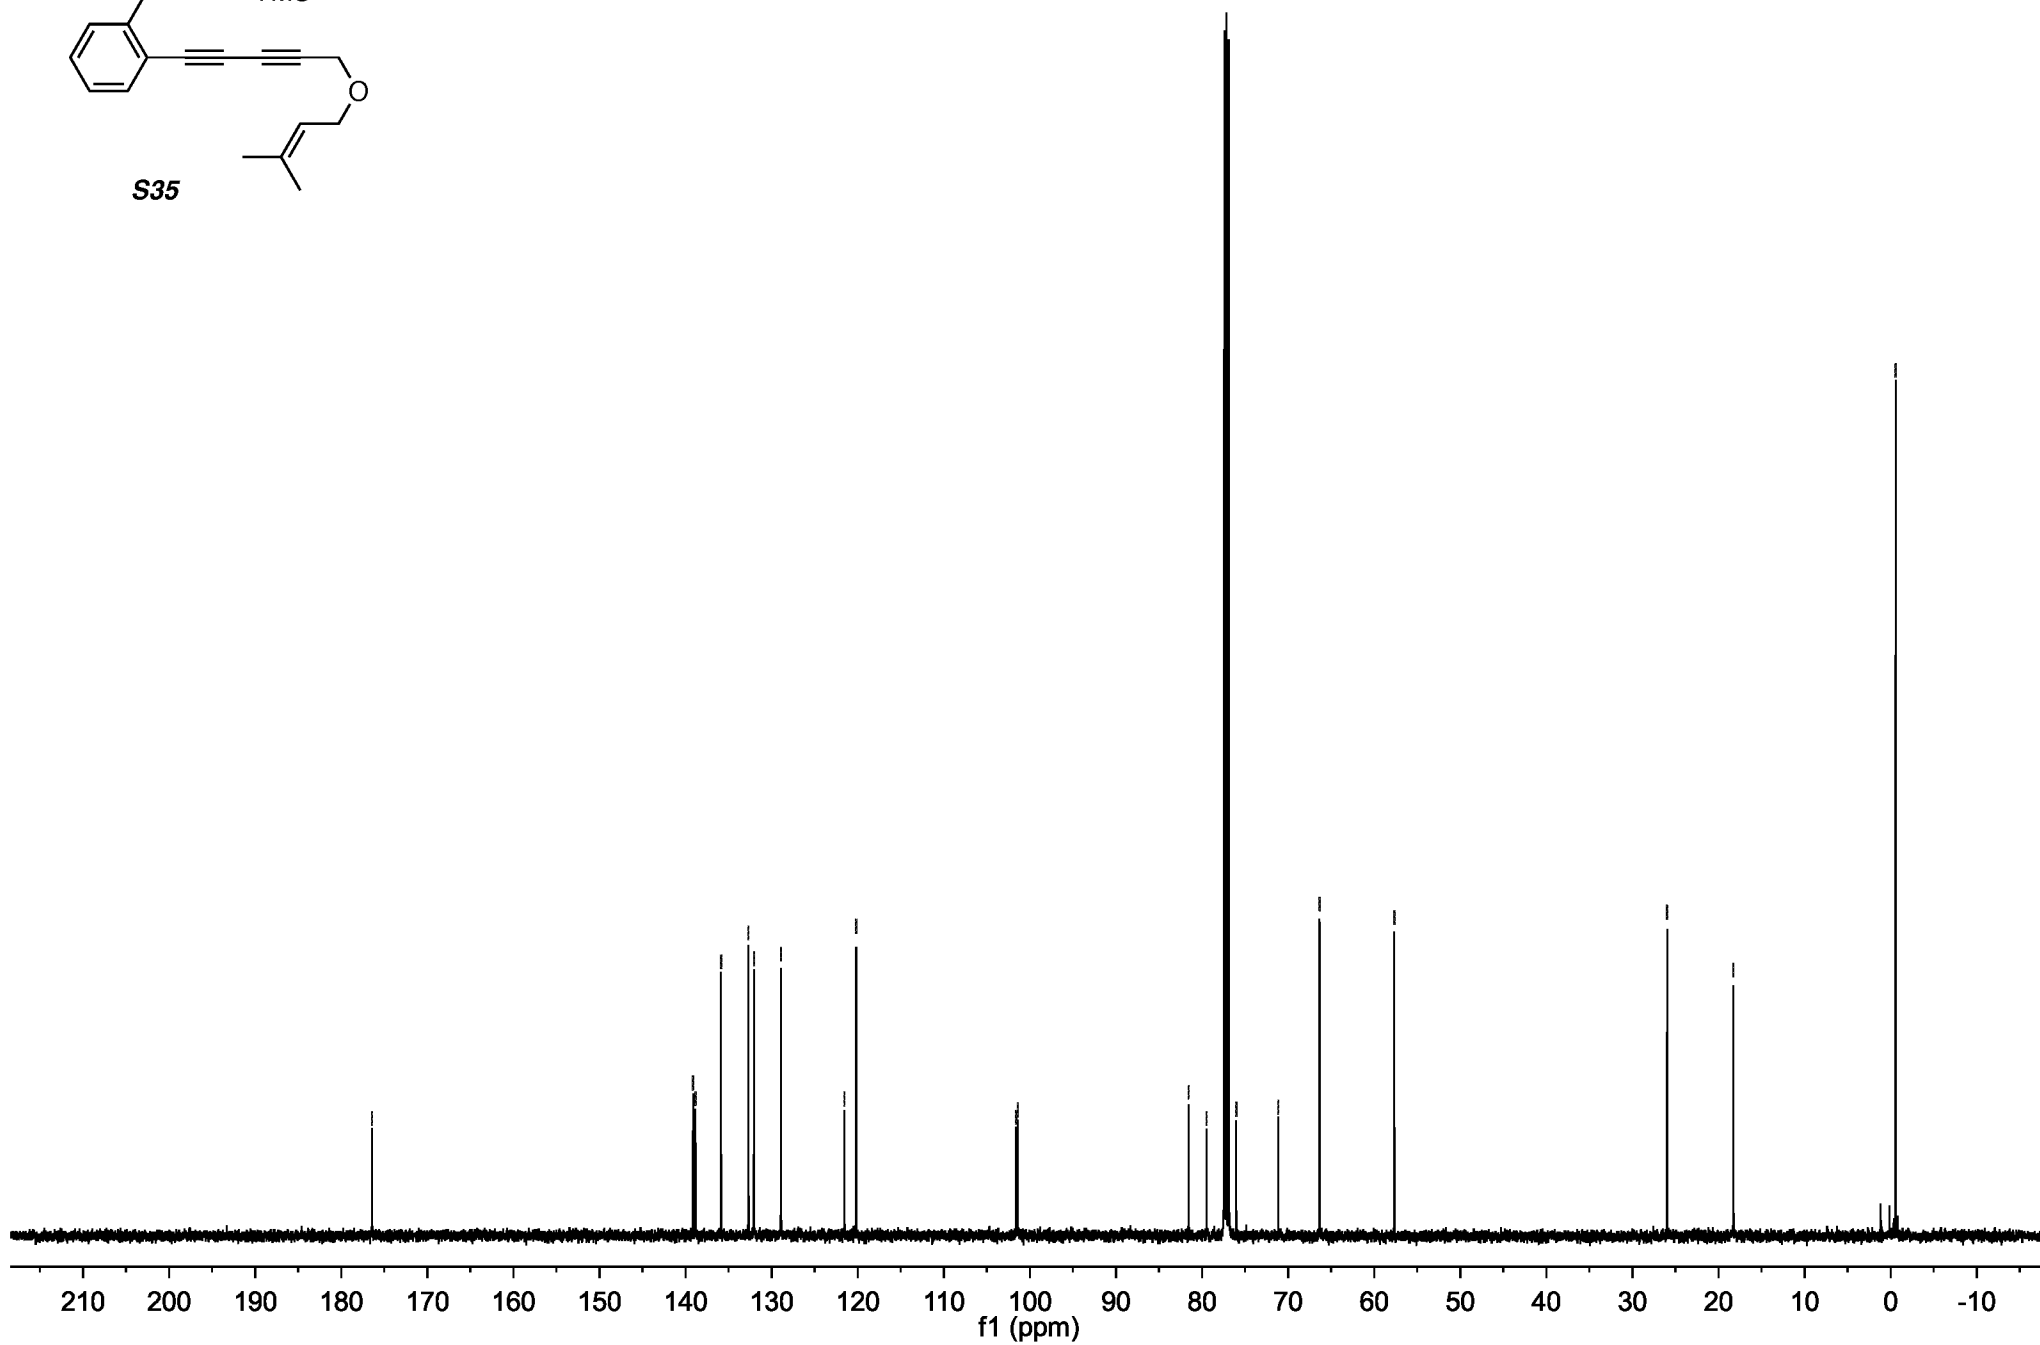

500 MHz, CDCl<sub>3</sub>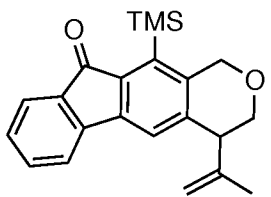**S36**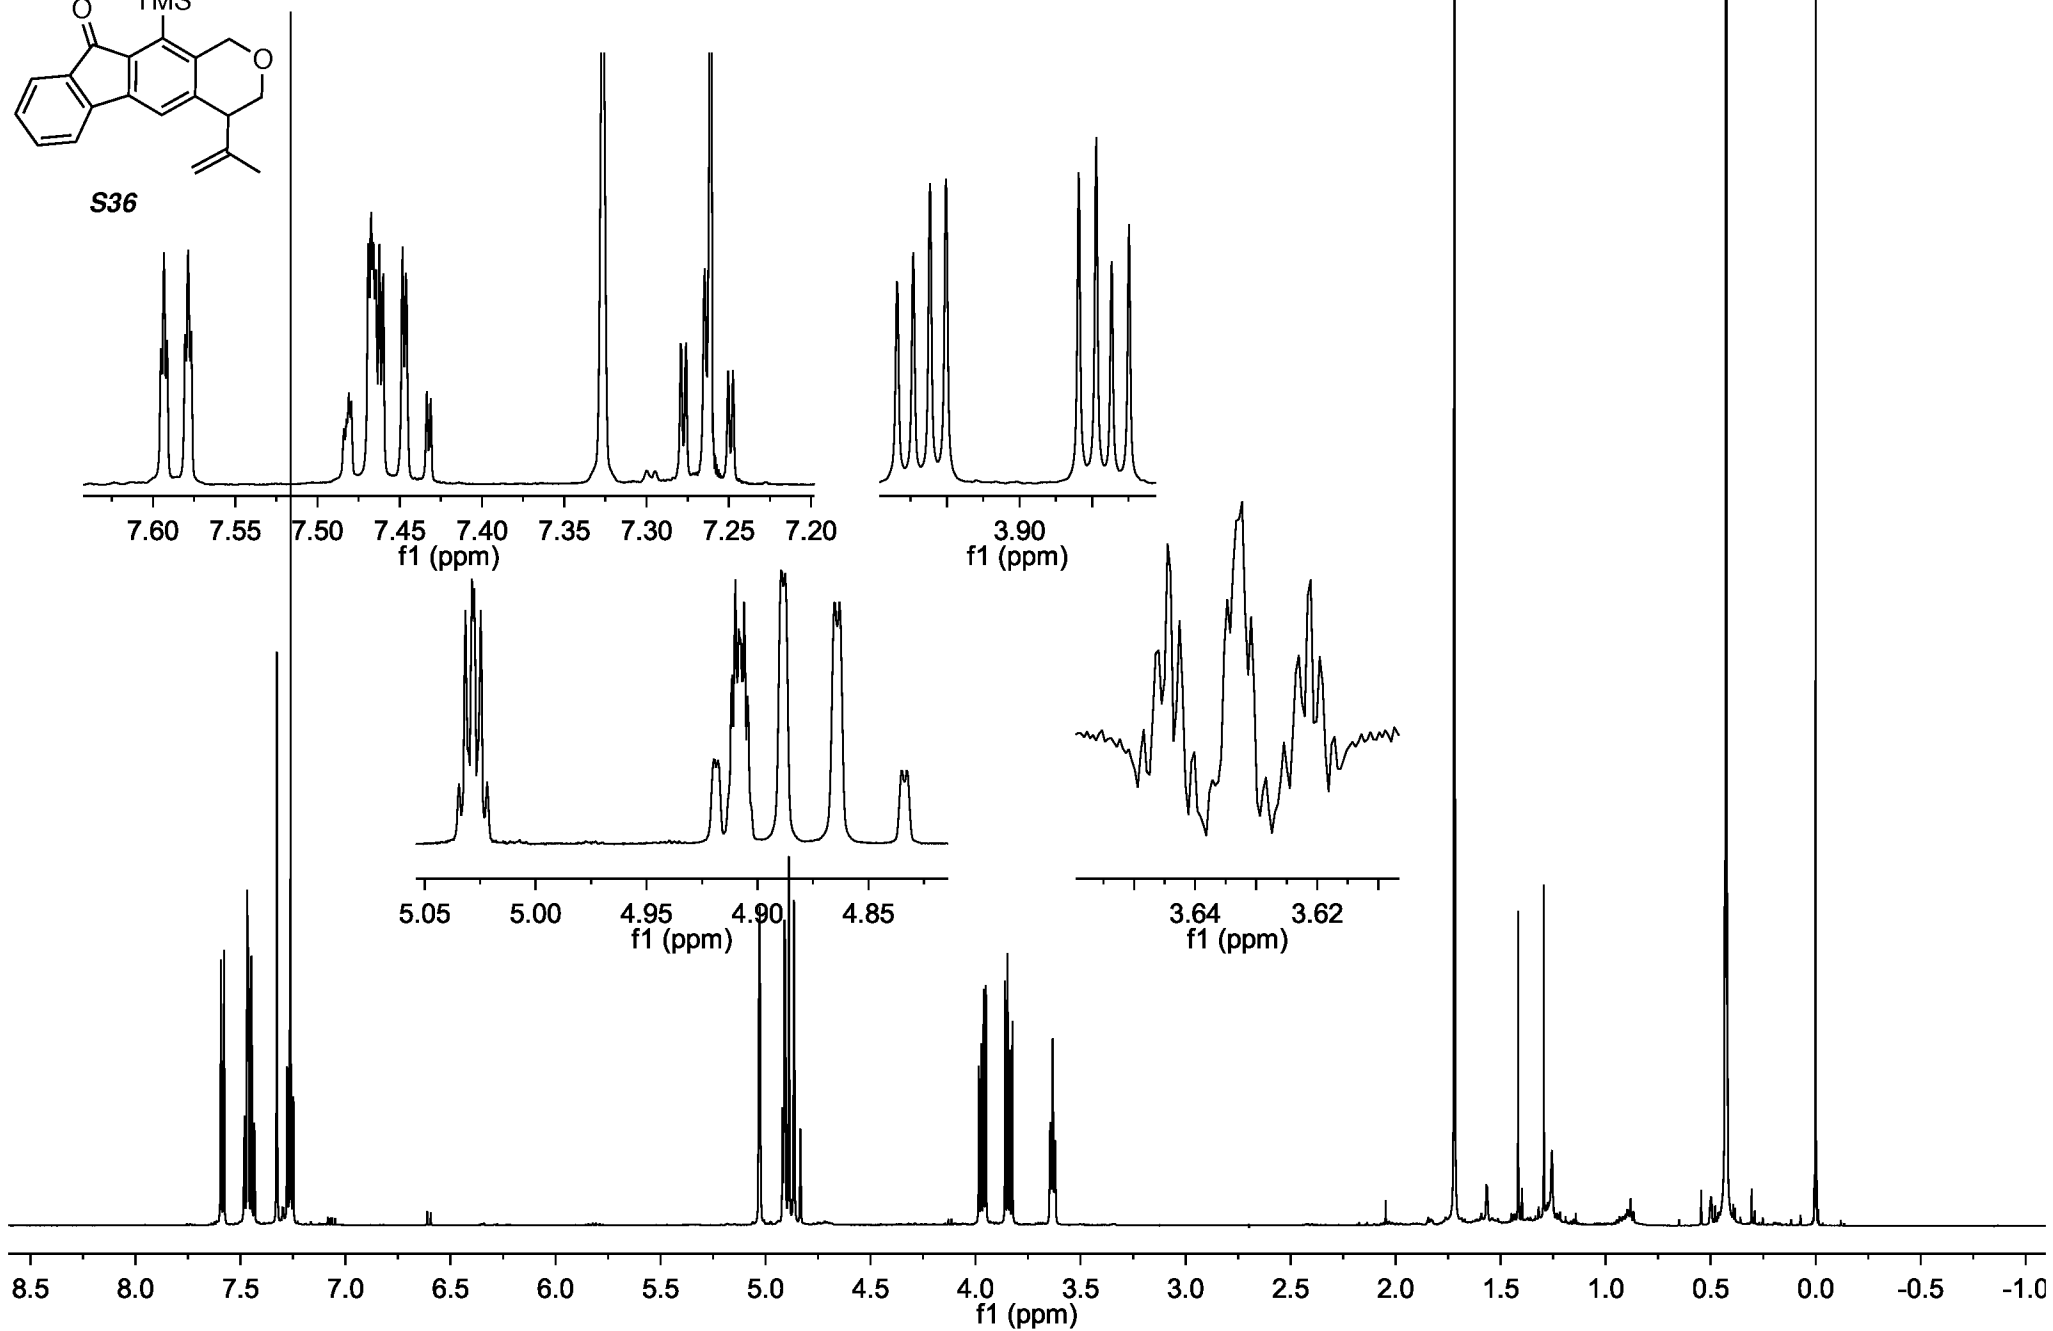



125 MHz, CDCl<sub>3</sub>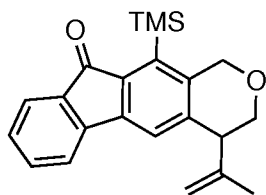**S36**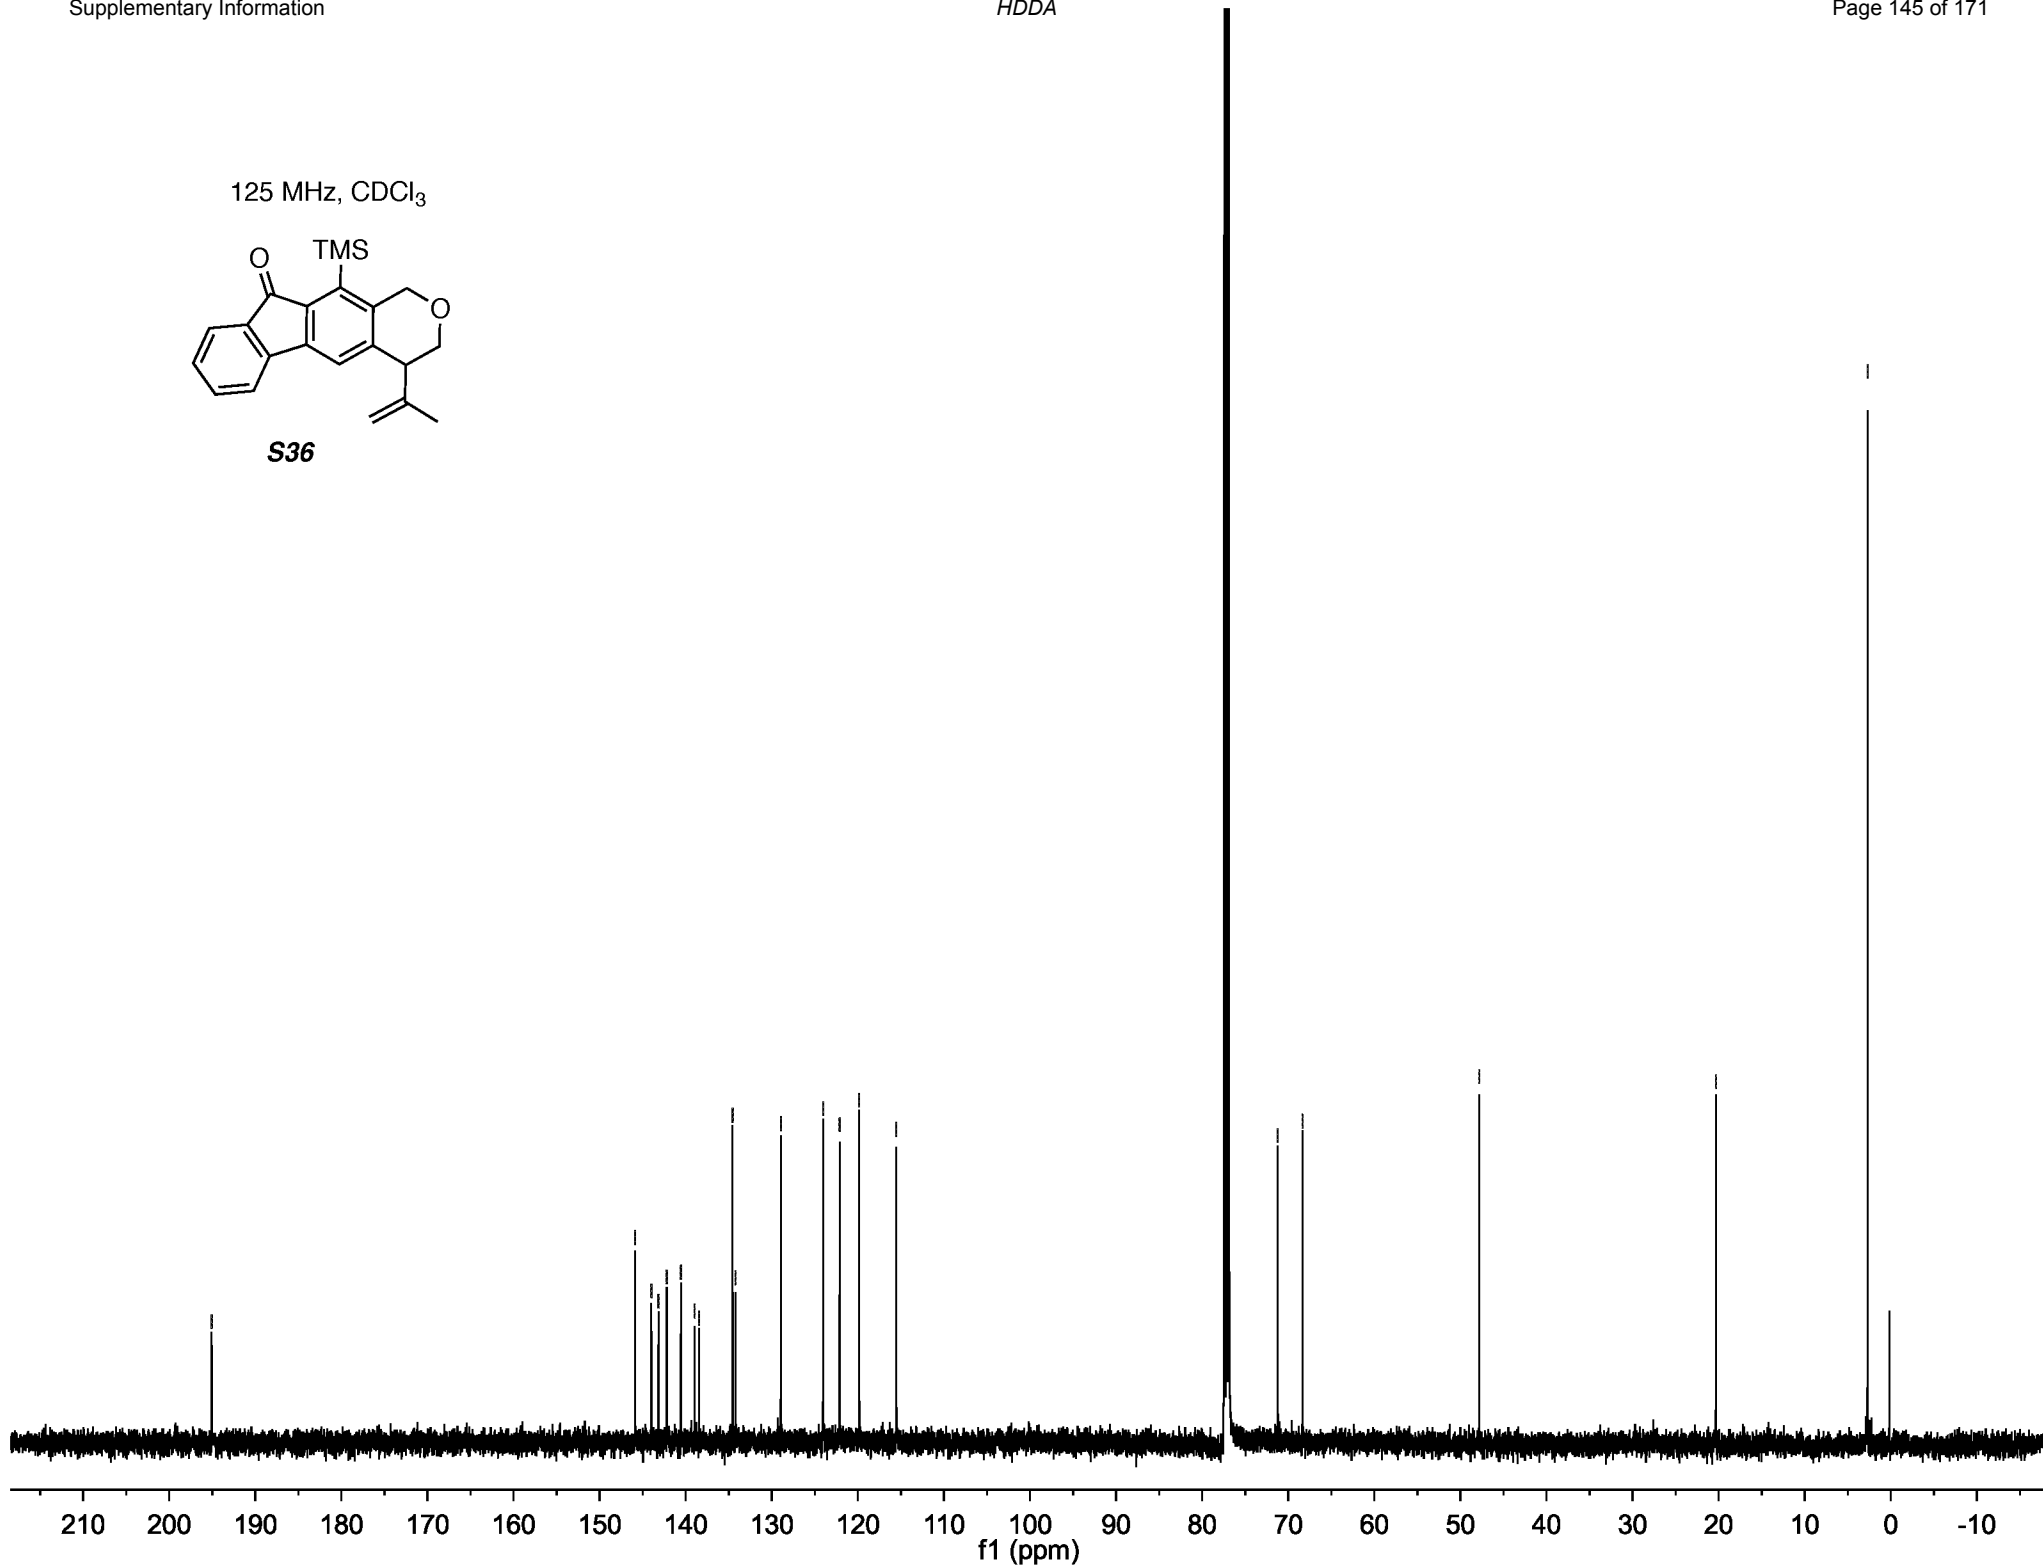

500 MHz, CDCl<sub>3</sub>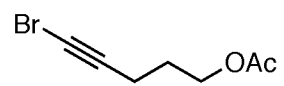**S37**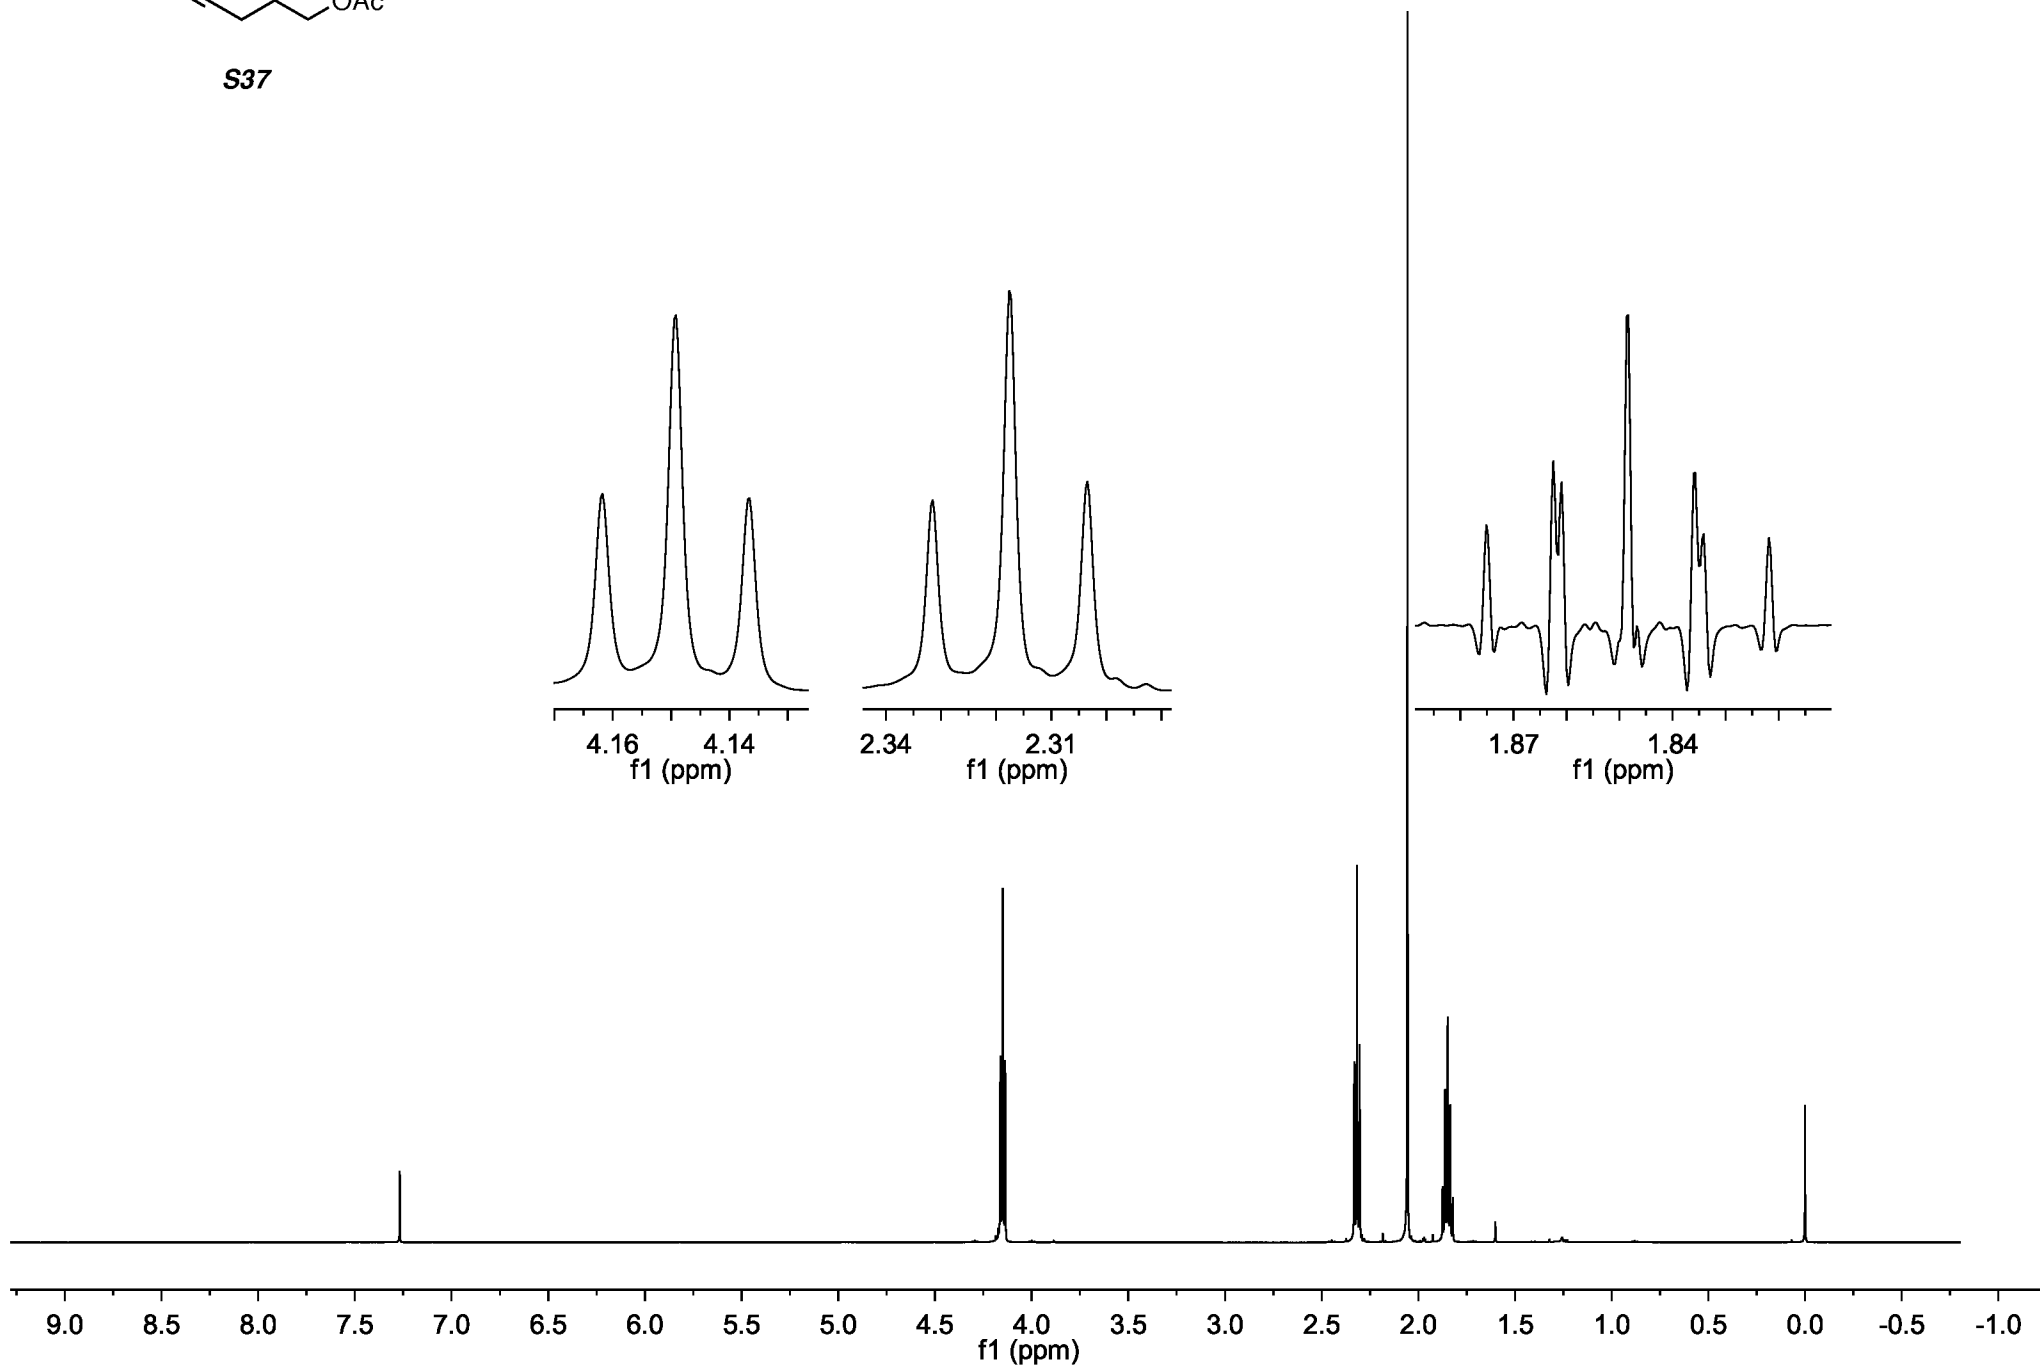

125 MHz, CDCl<sub>3</sub>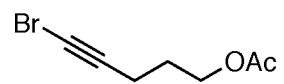**S37**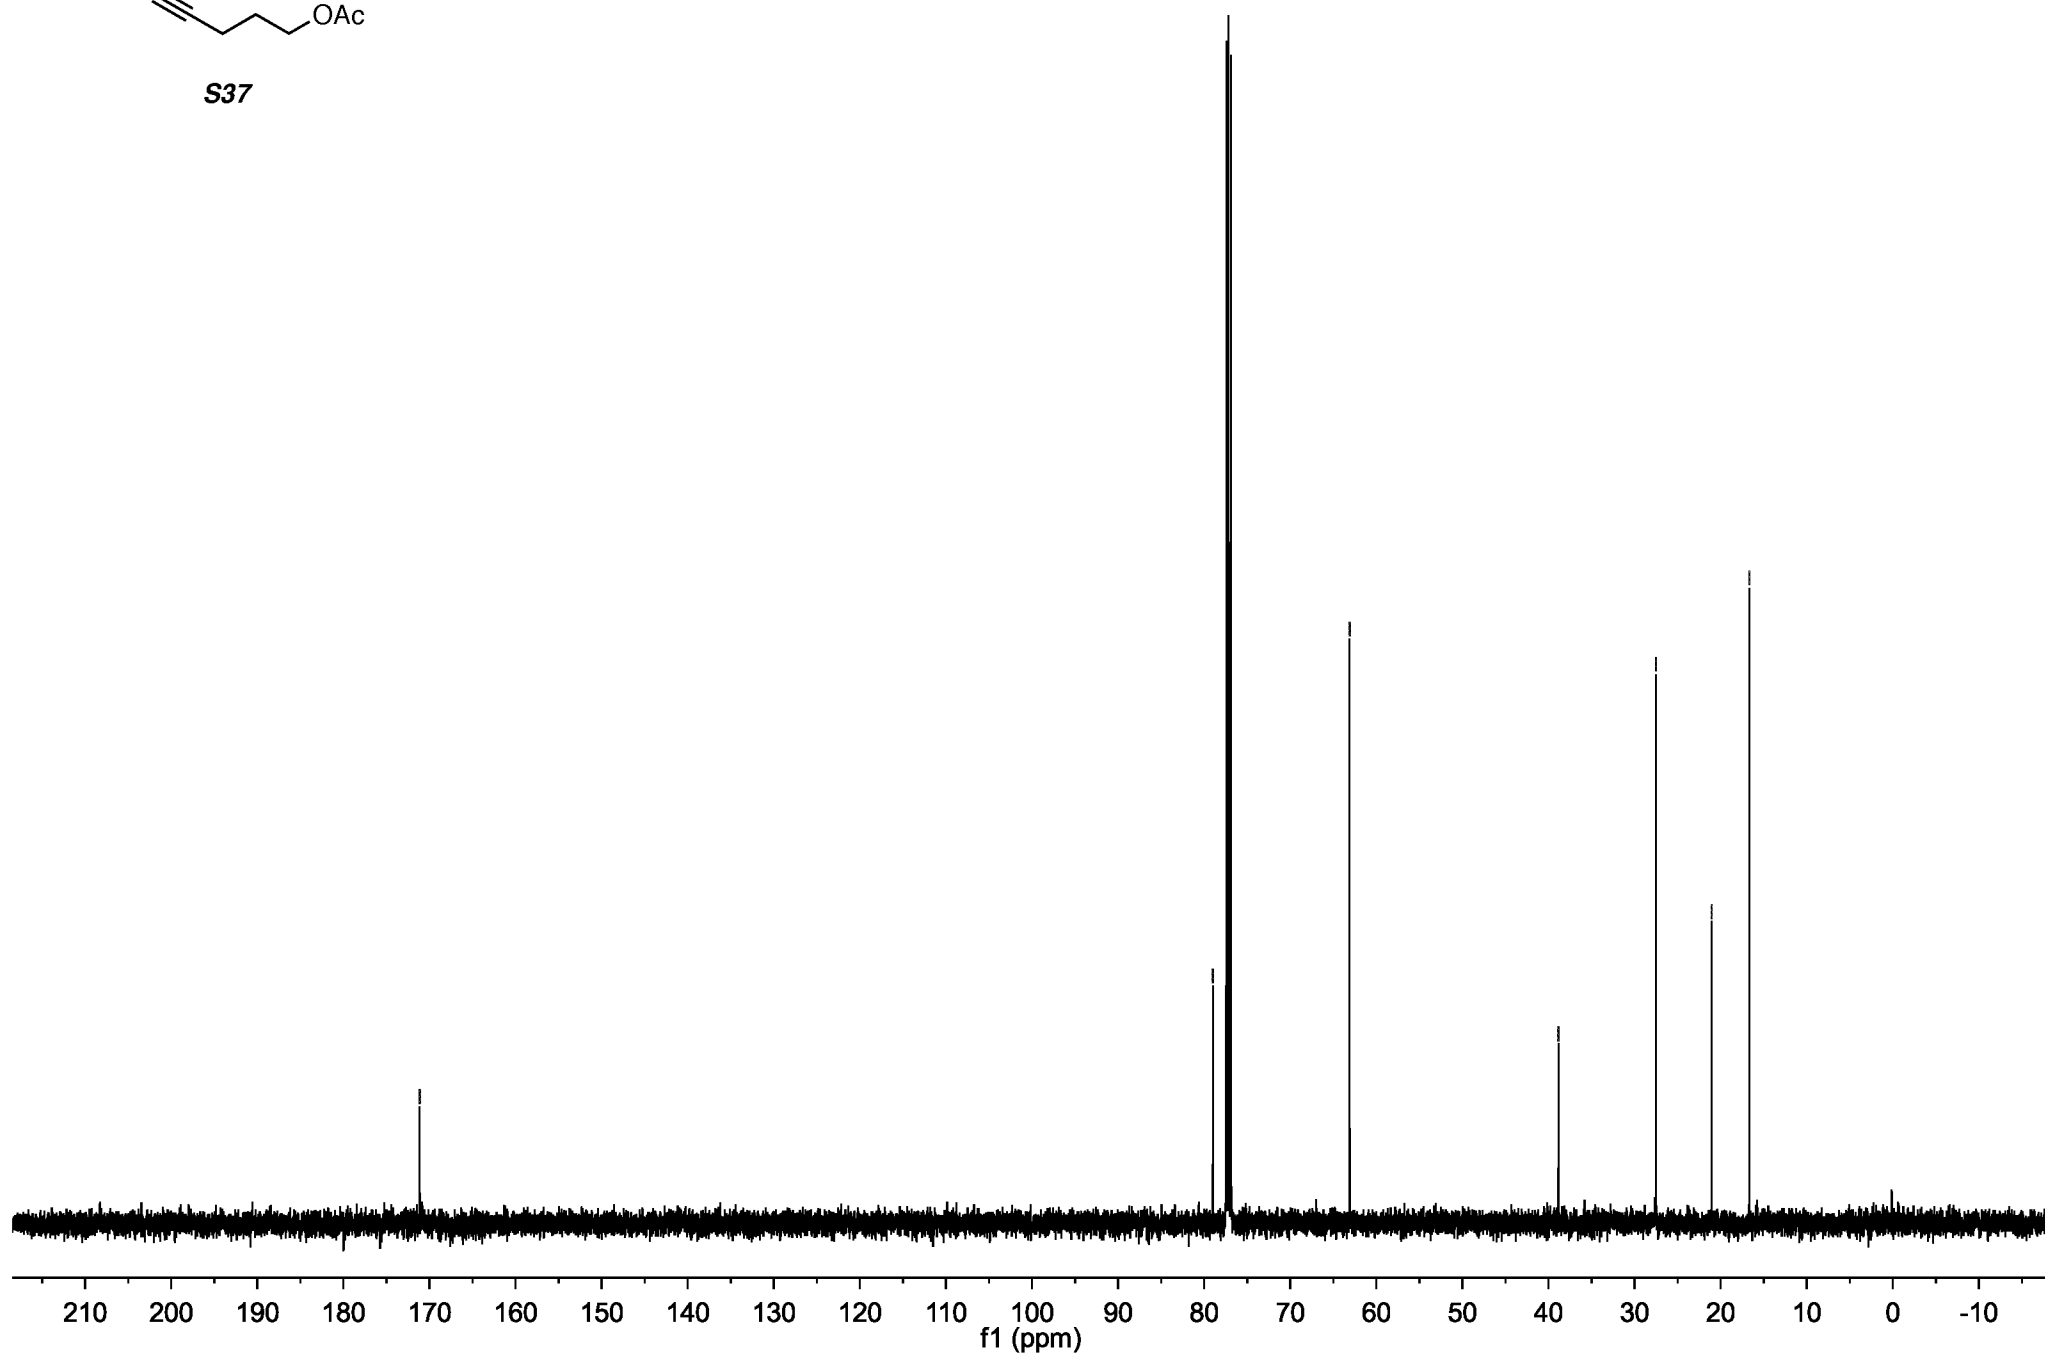

500 MHz, CDCl<sub>3</sub>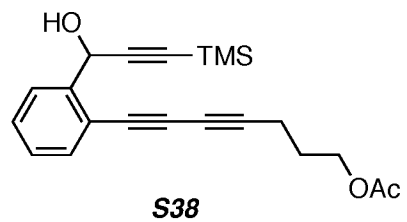**S38**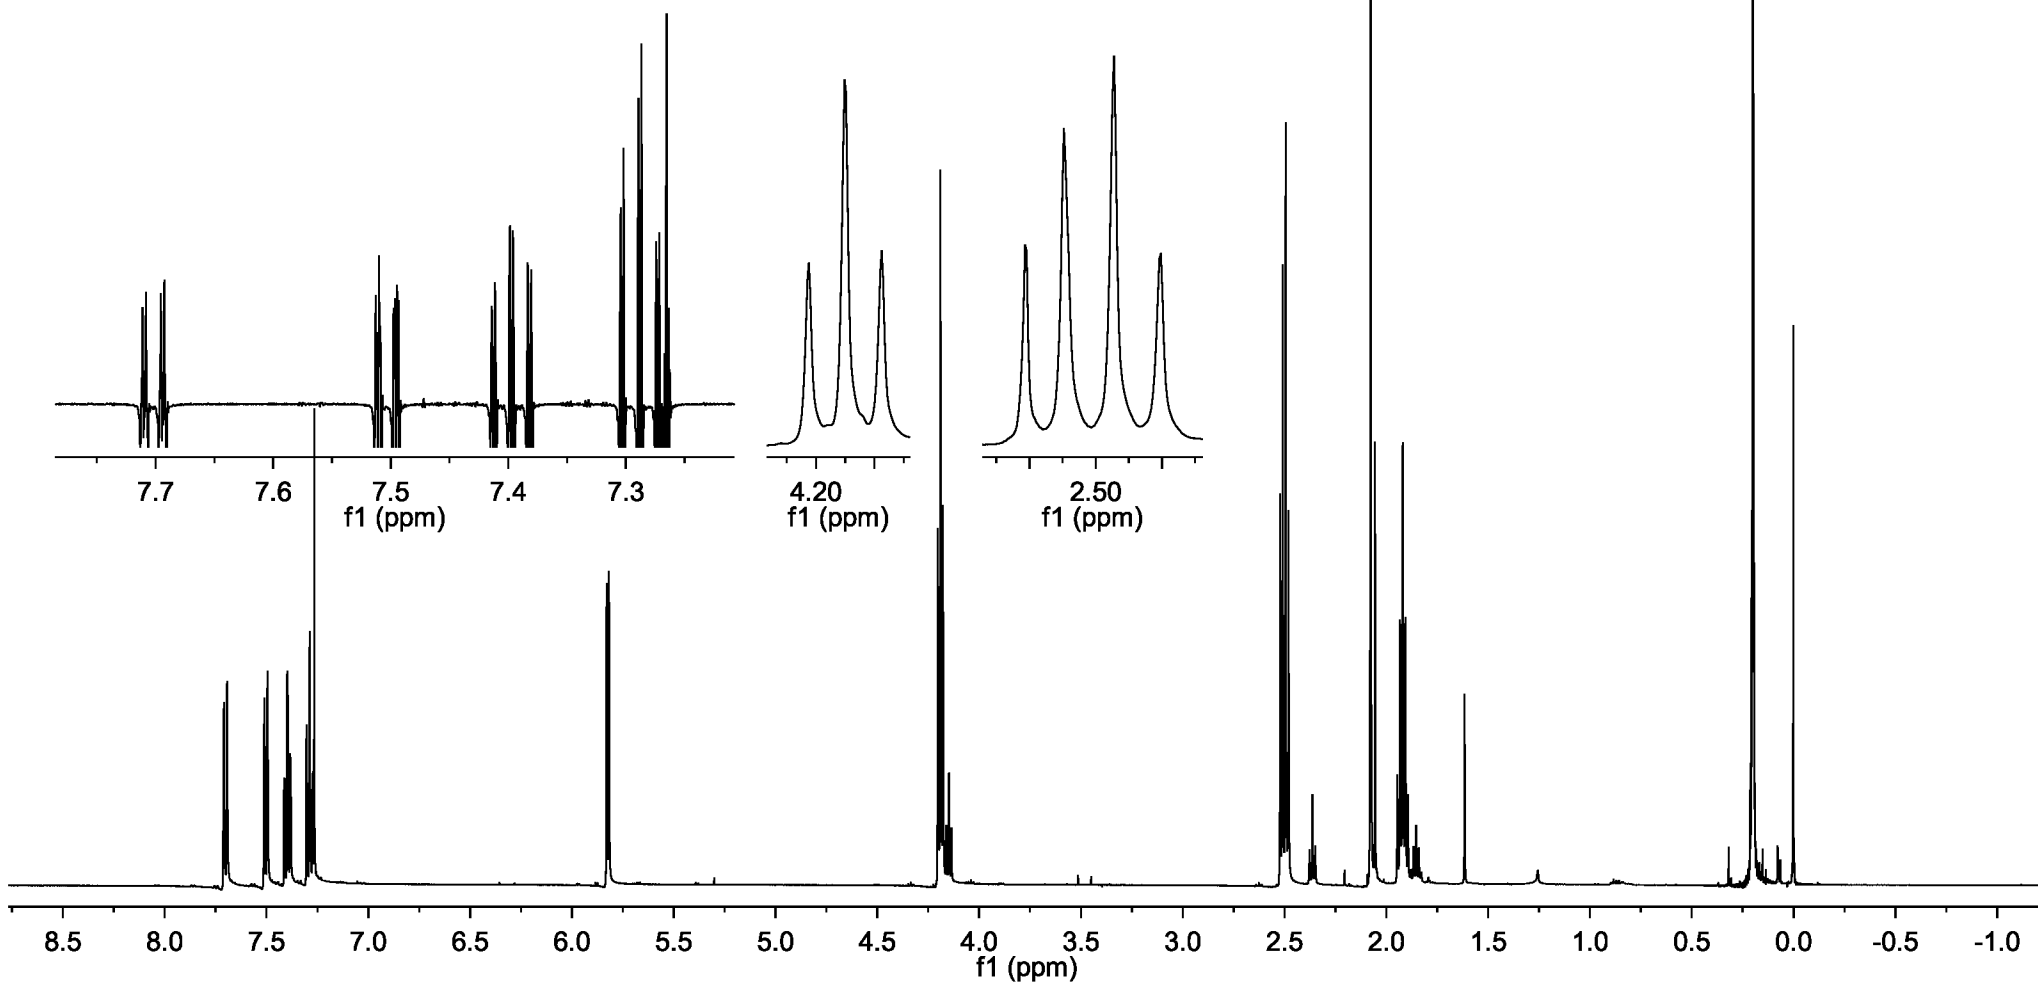

125 MHz, CDCl<sub>3</sub>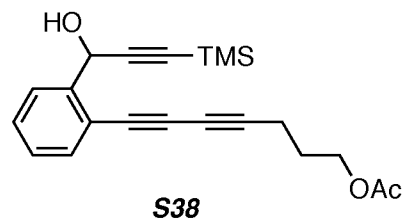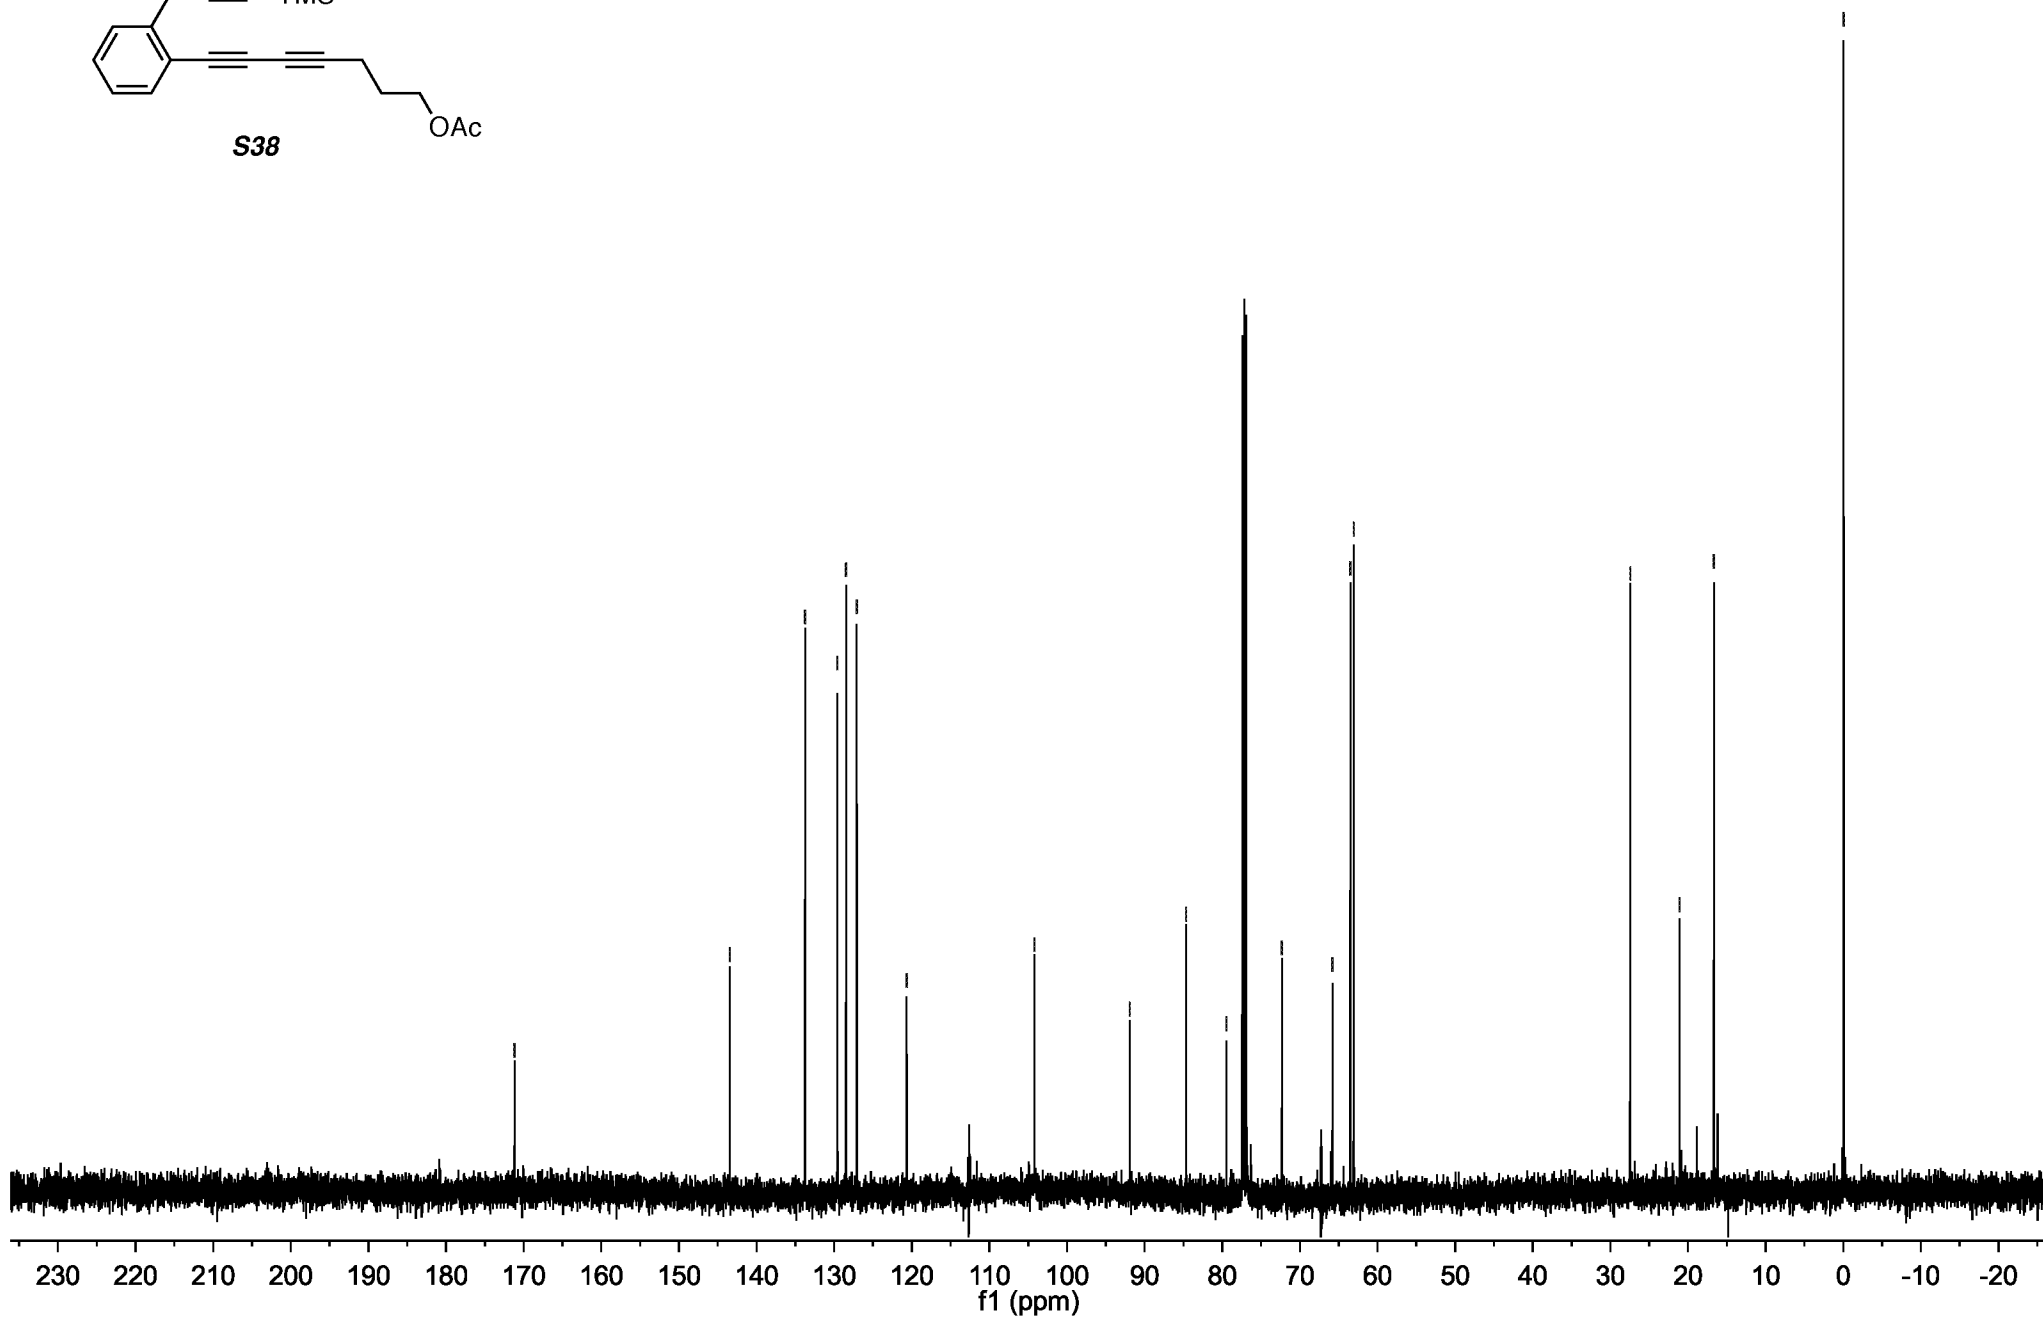

500 MHz, CDCl<sub>3</sub>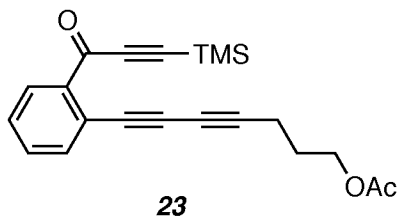**23**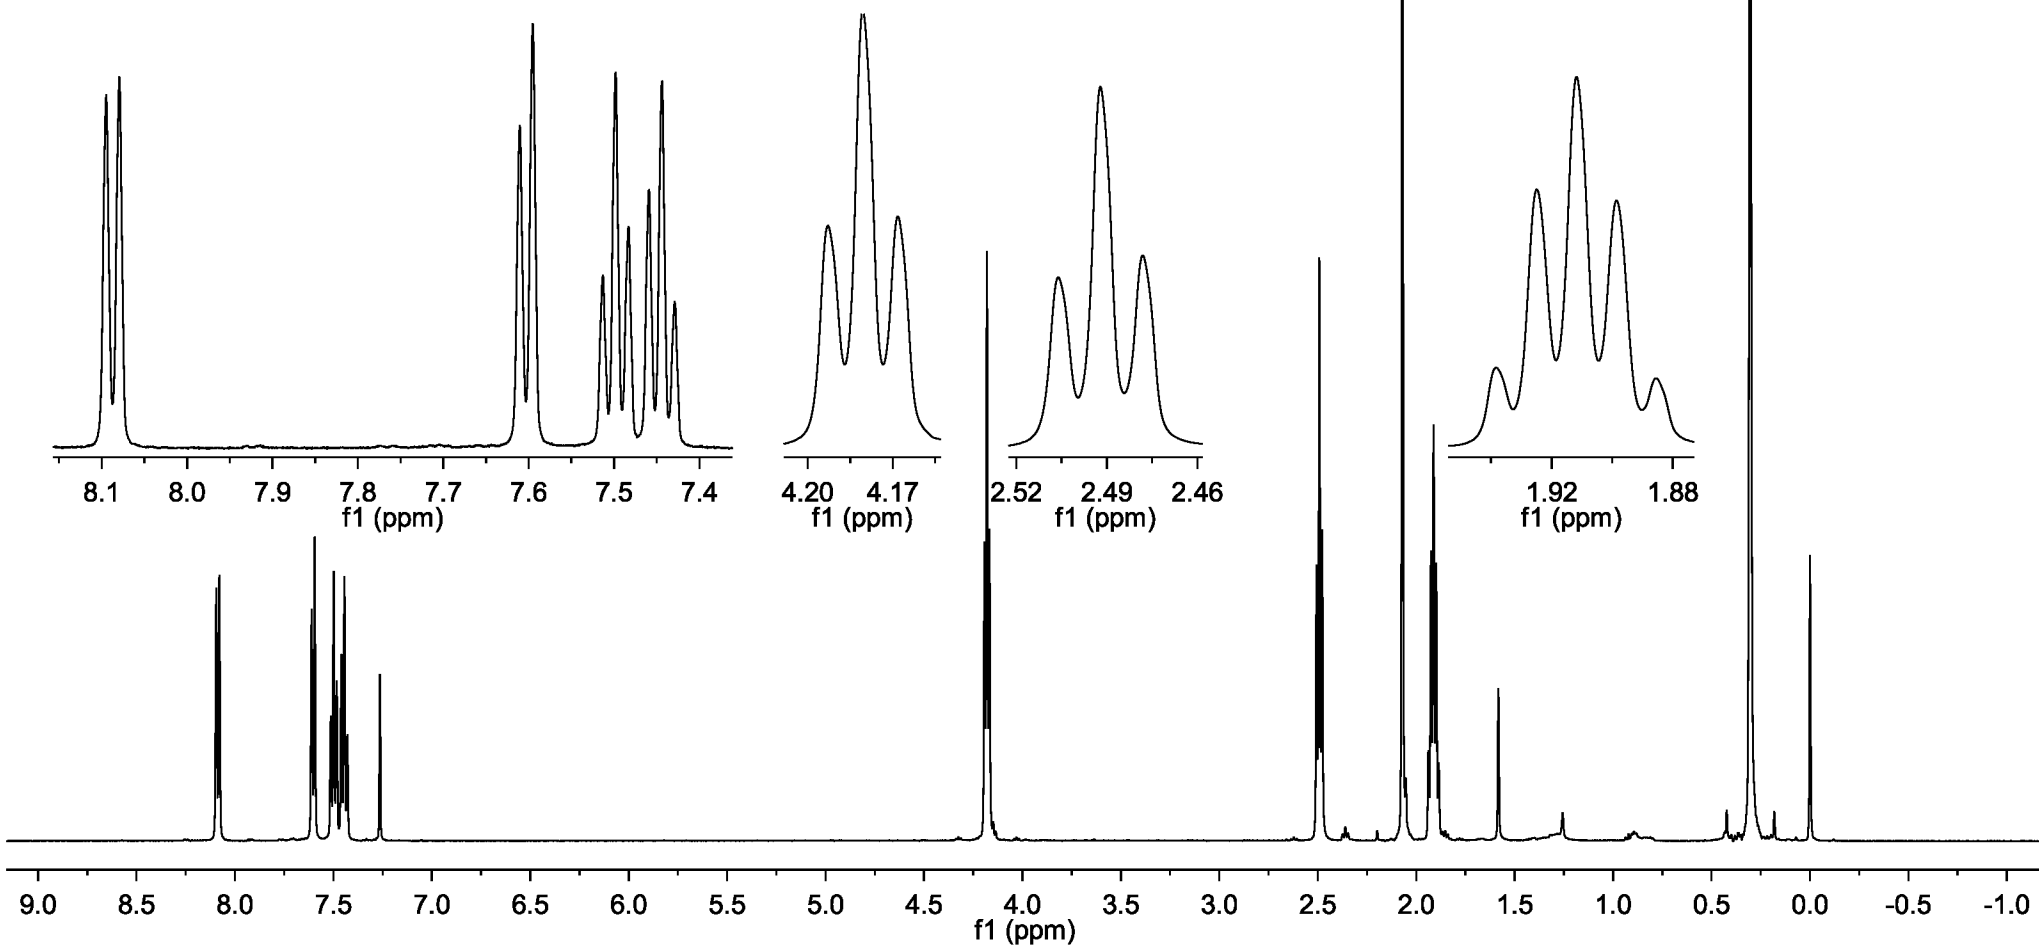

125 MHz, CDCl<sub>3</sub>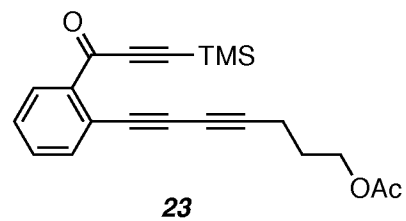**23**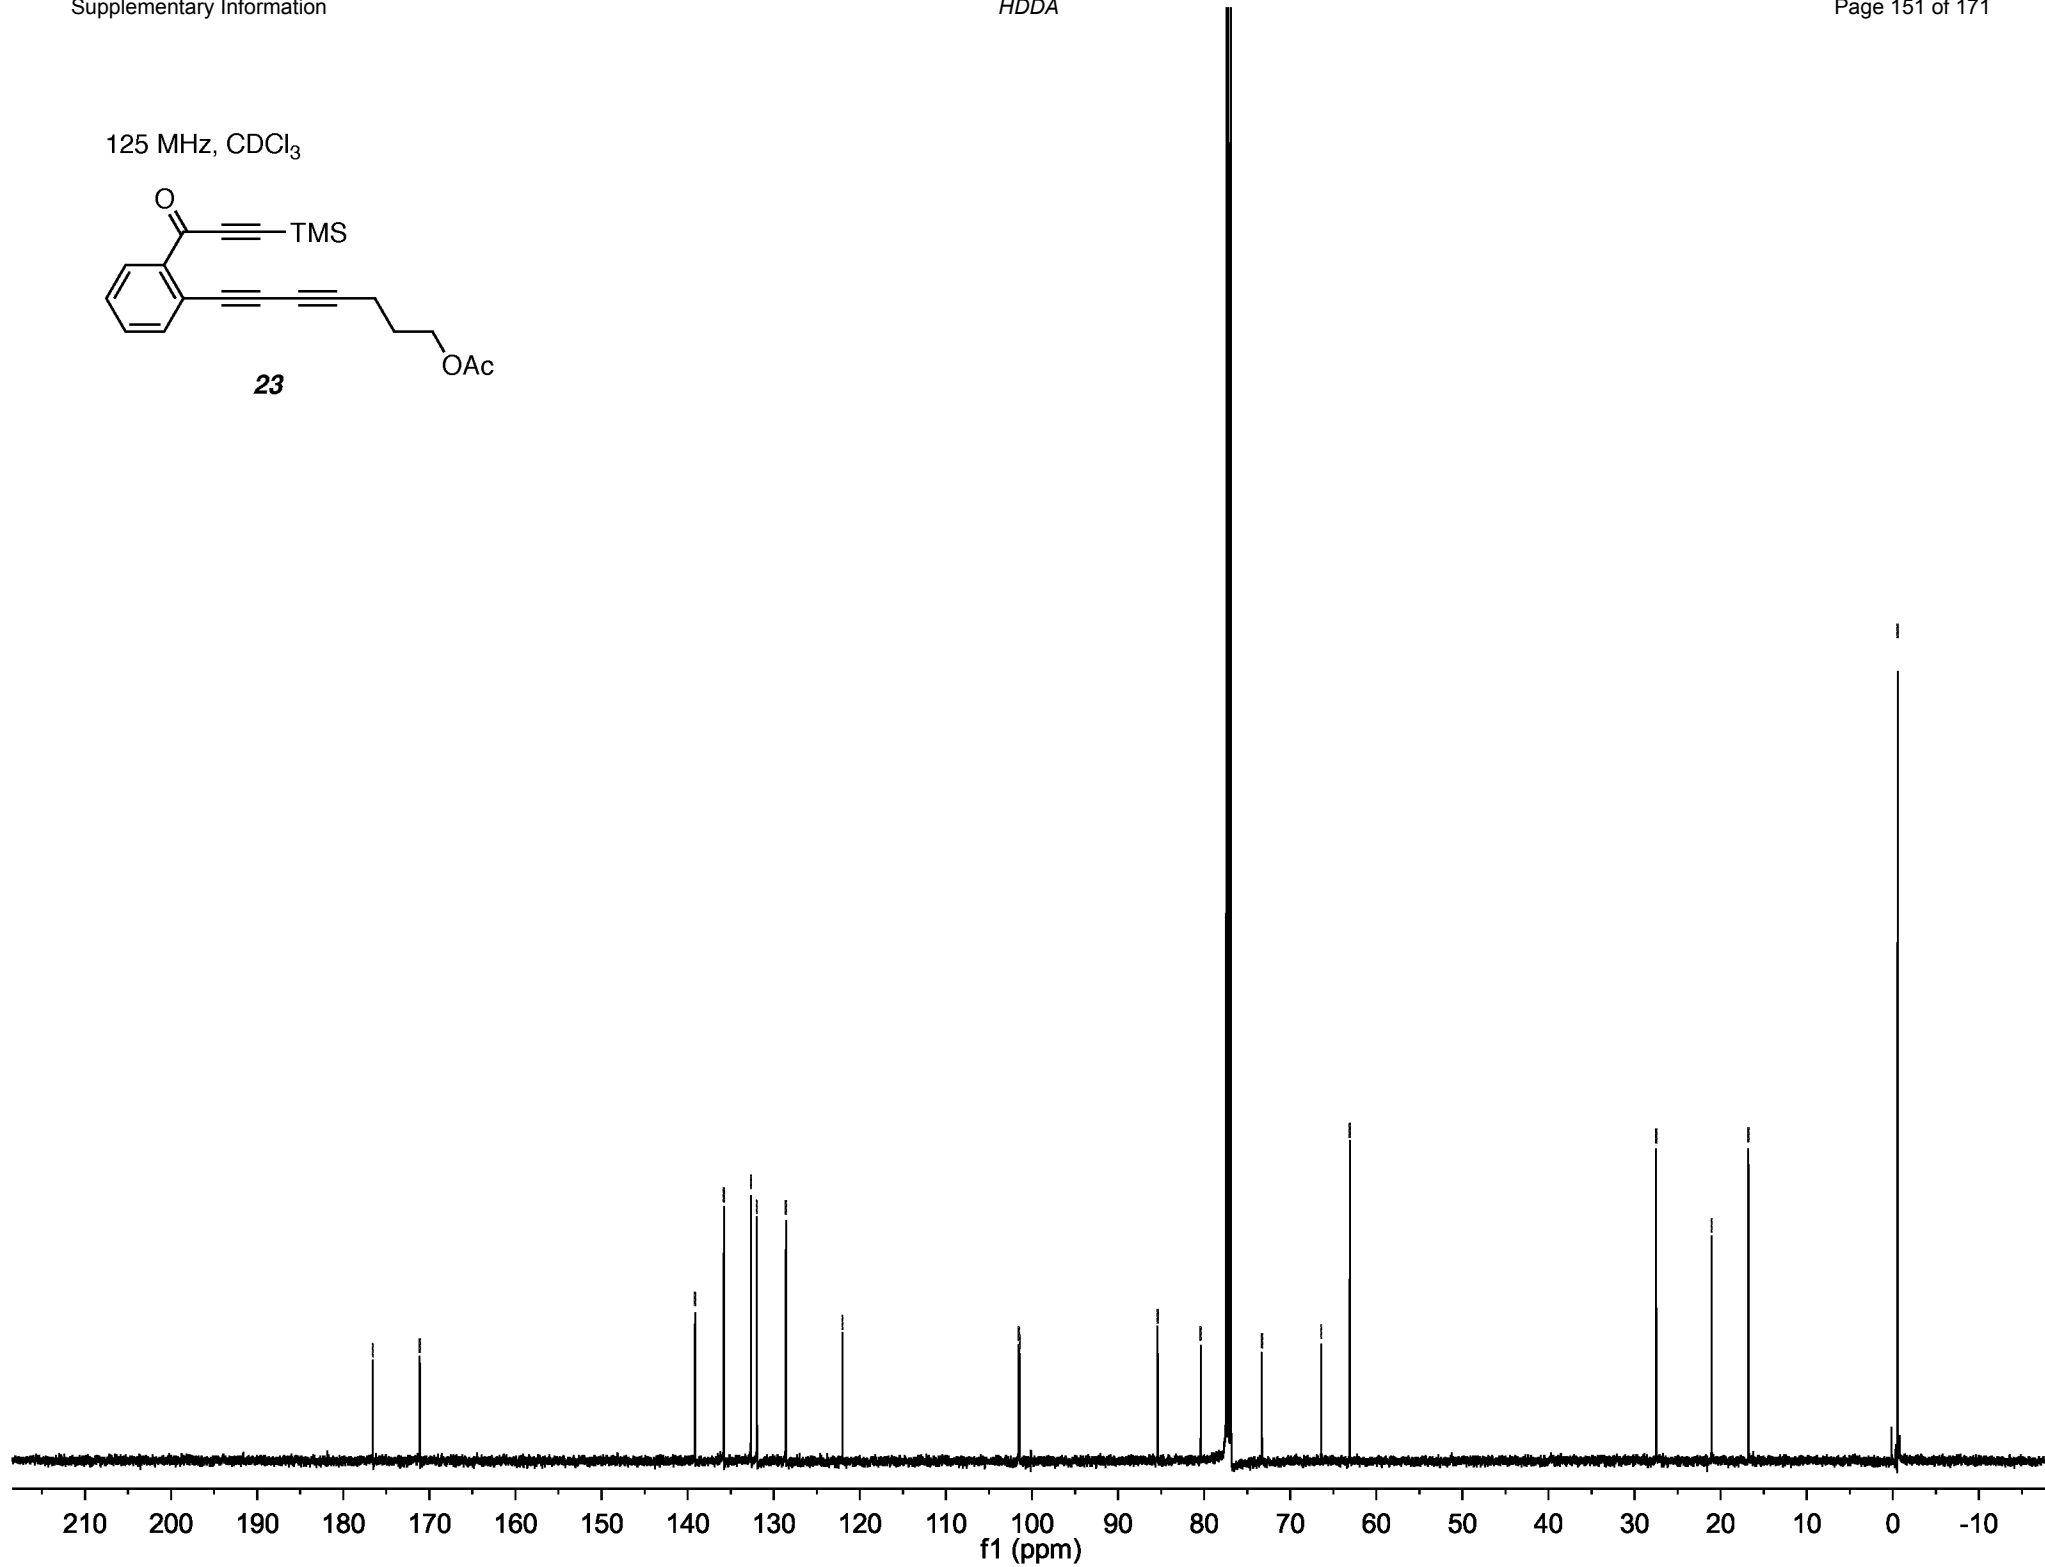

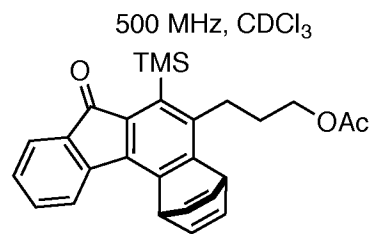**25a**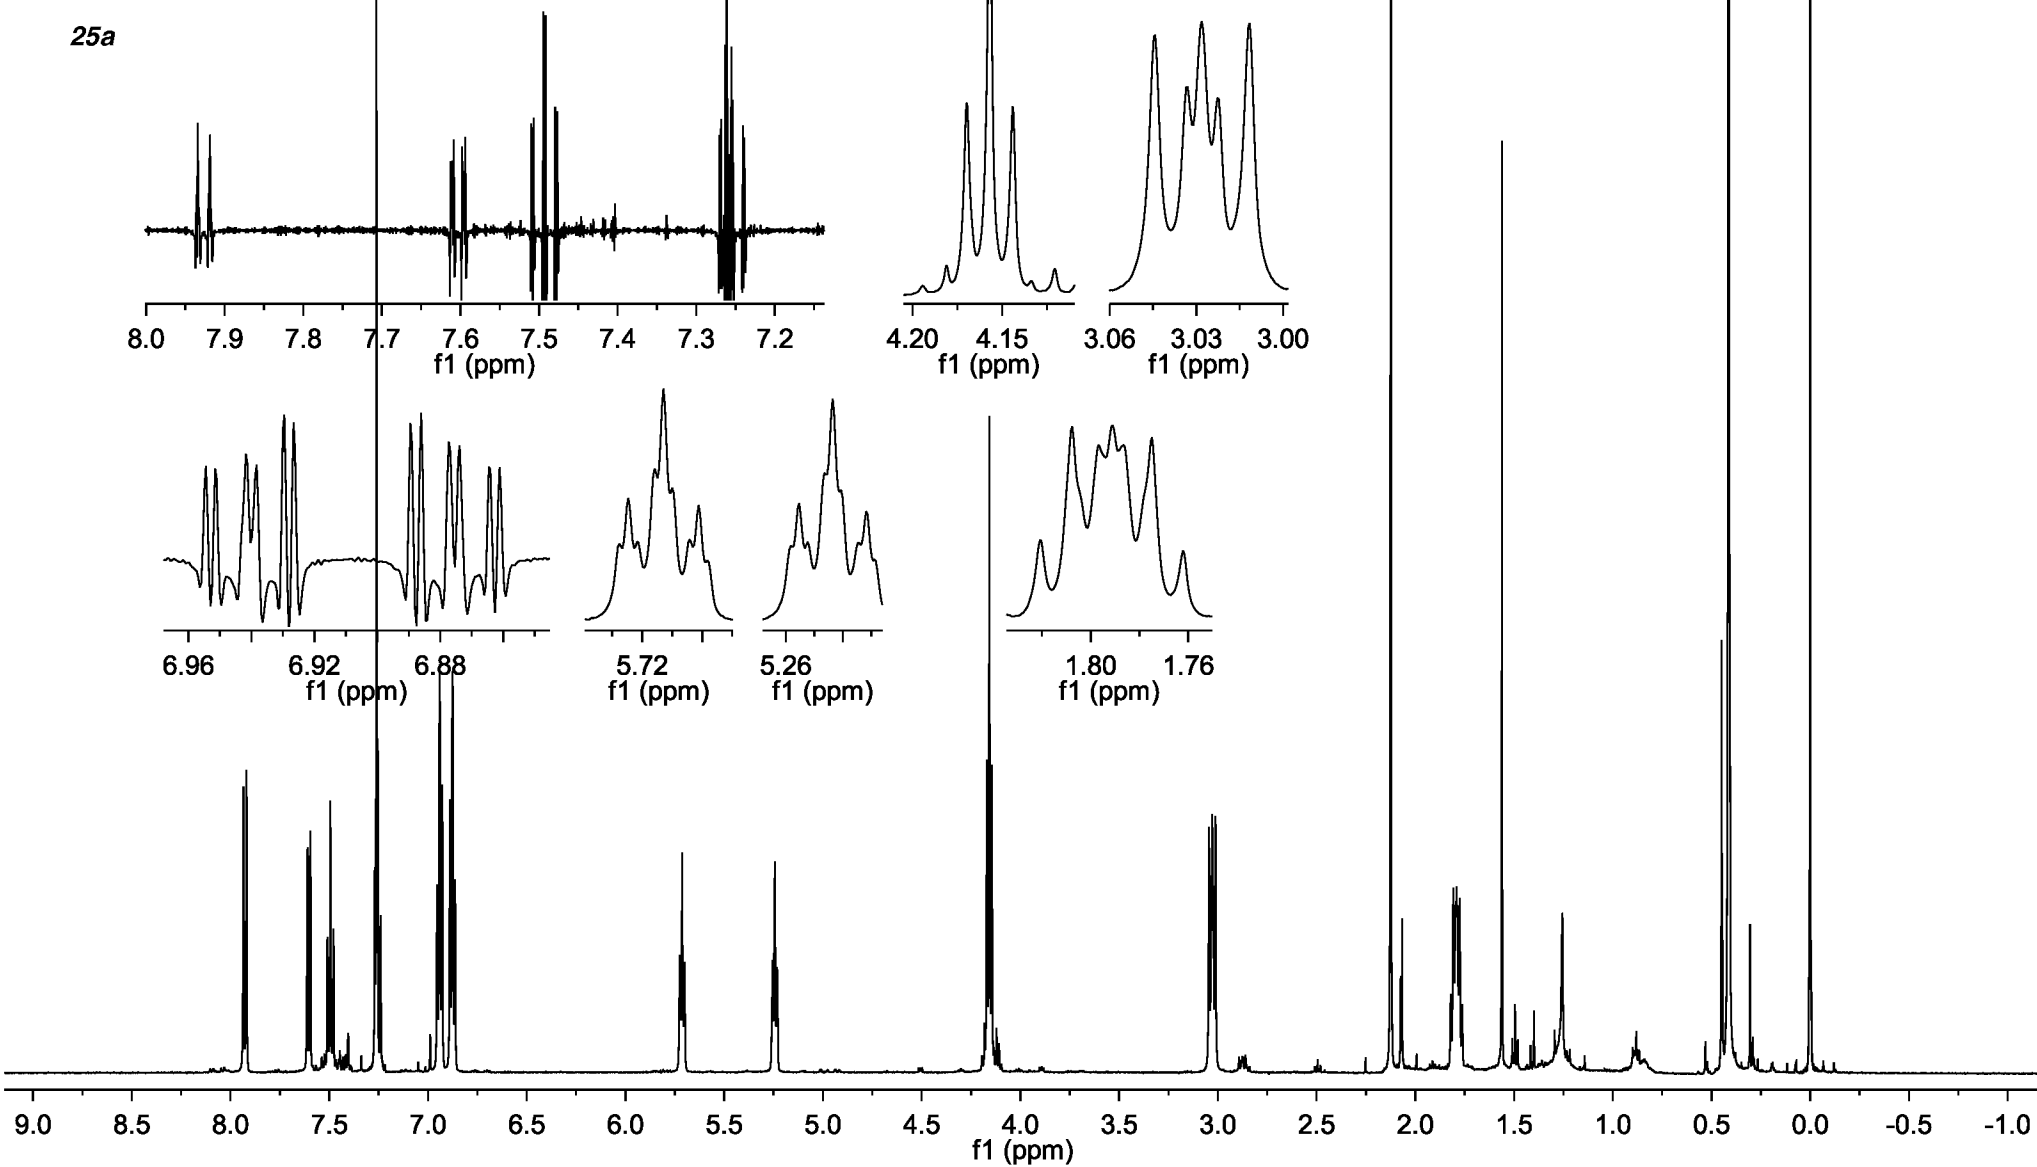



125 MHz, CDCl<sub>3</sub>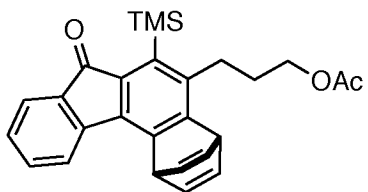**25a**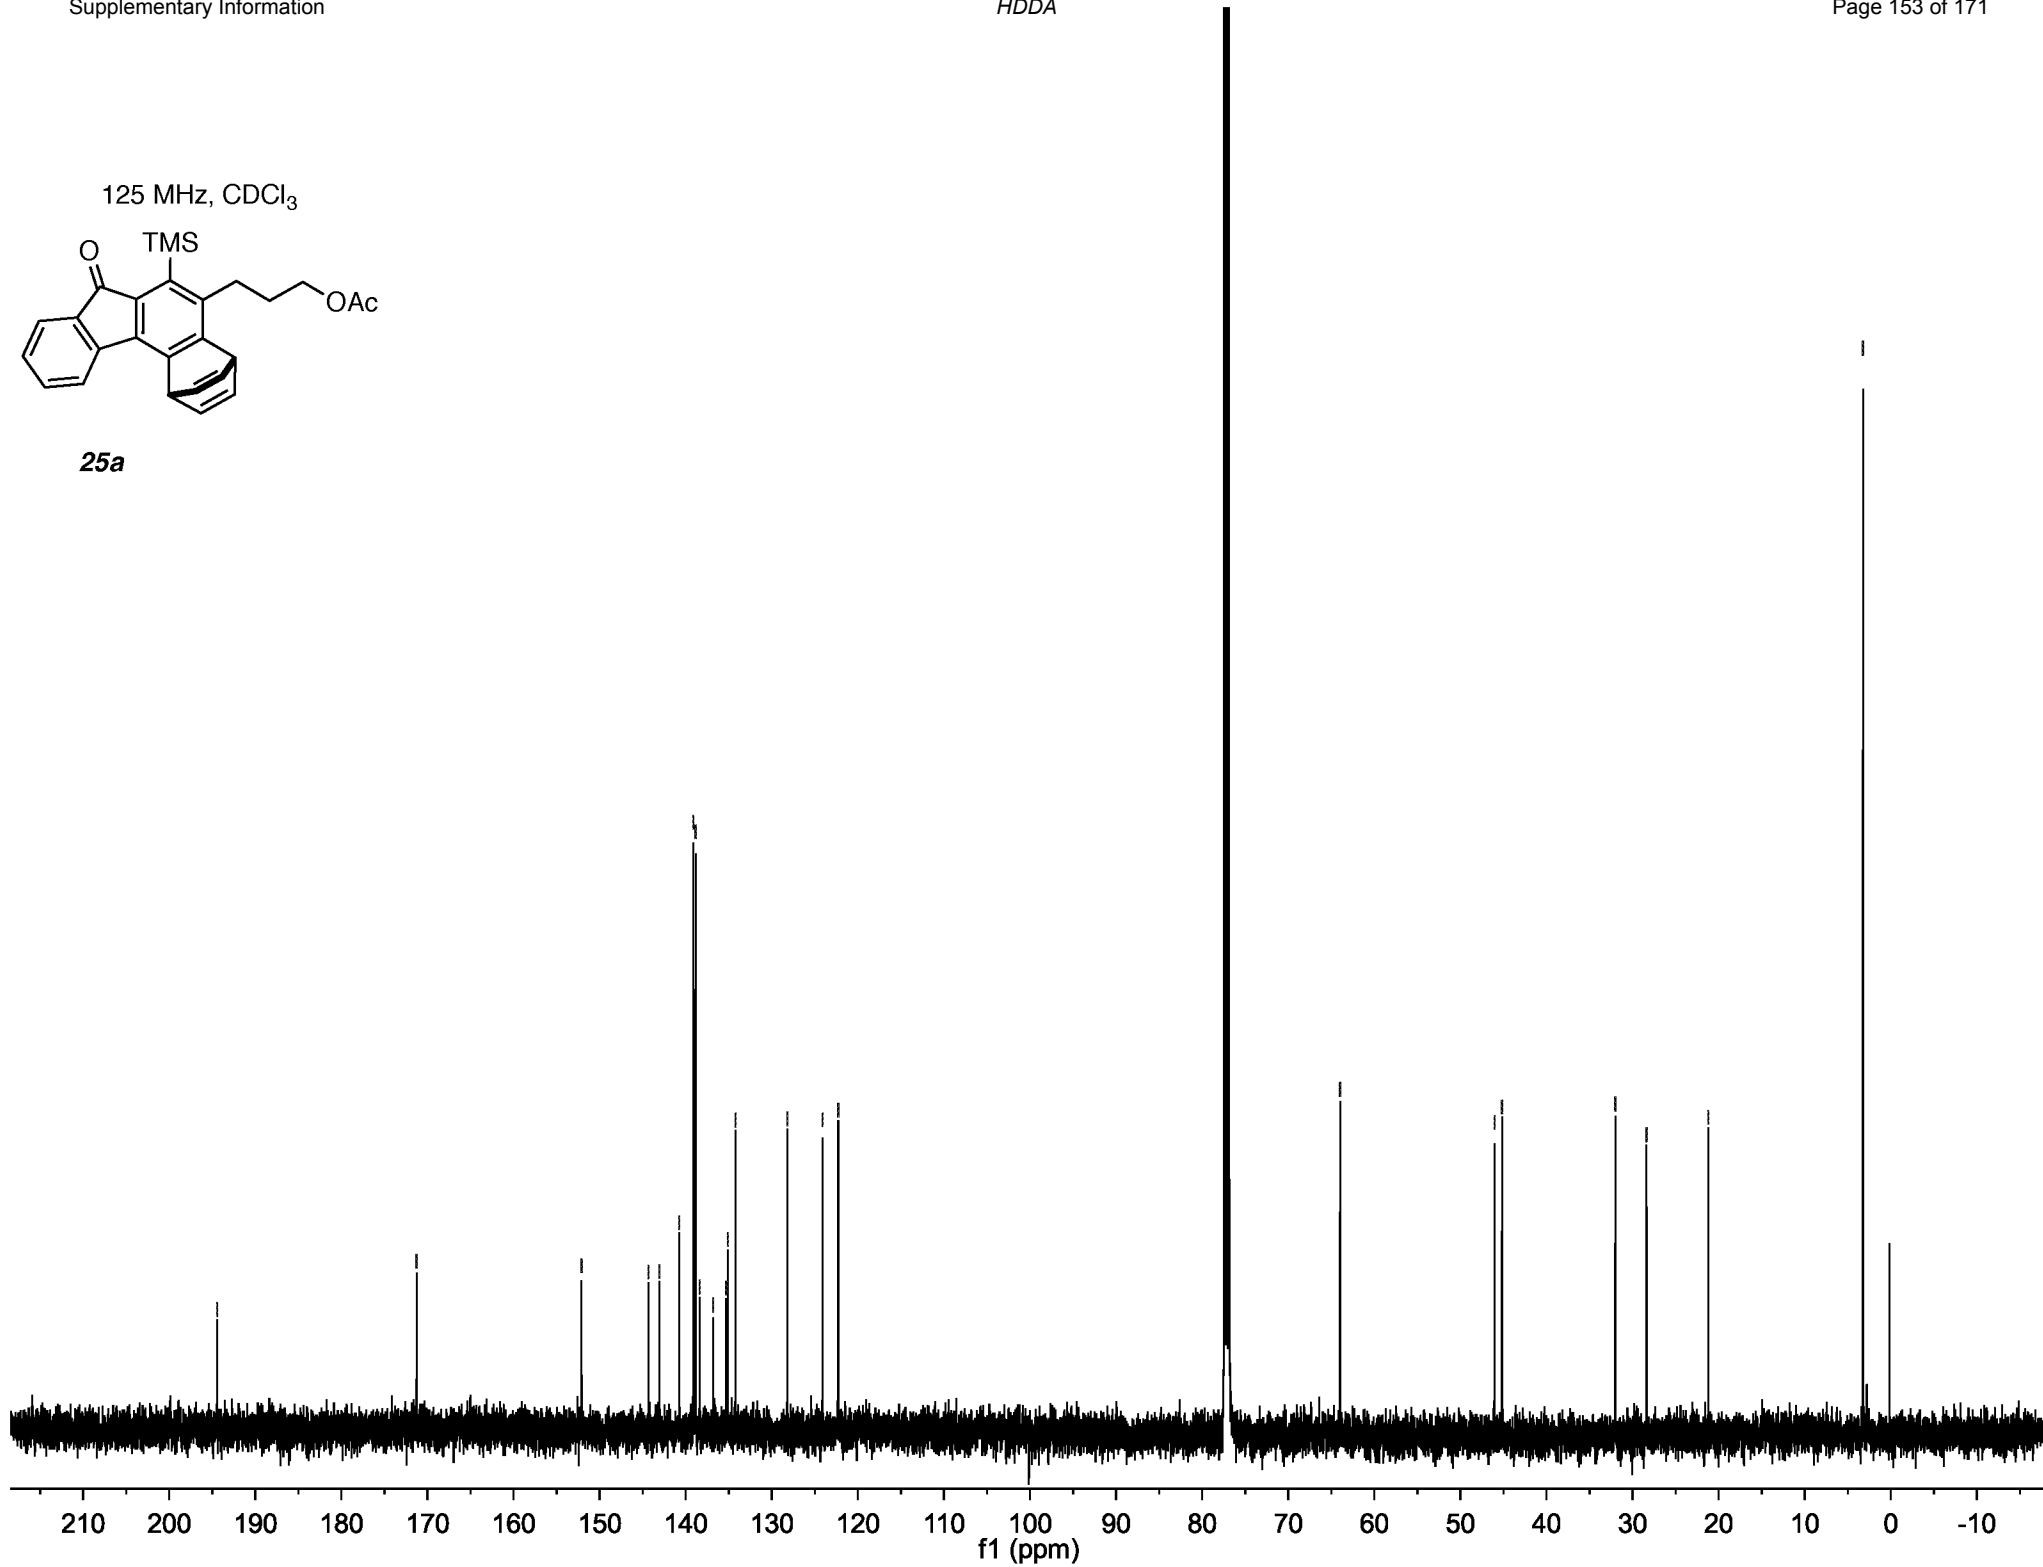

500 MHz, CDCl<sub>3</sub>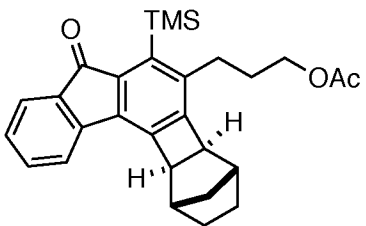**25b**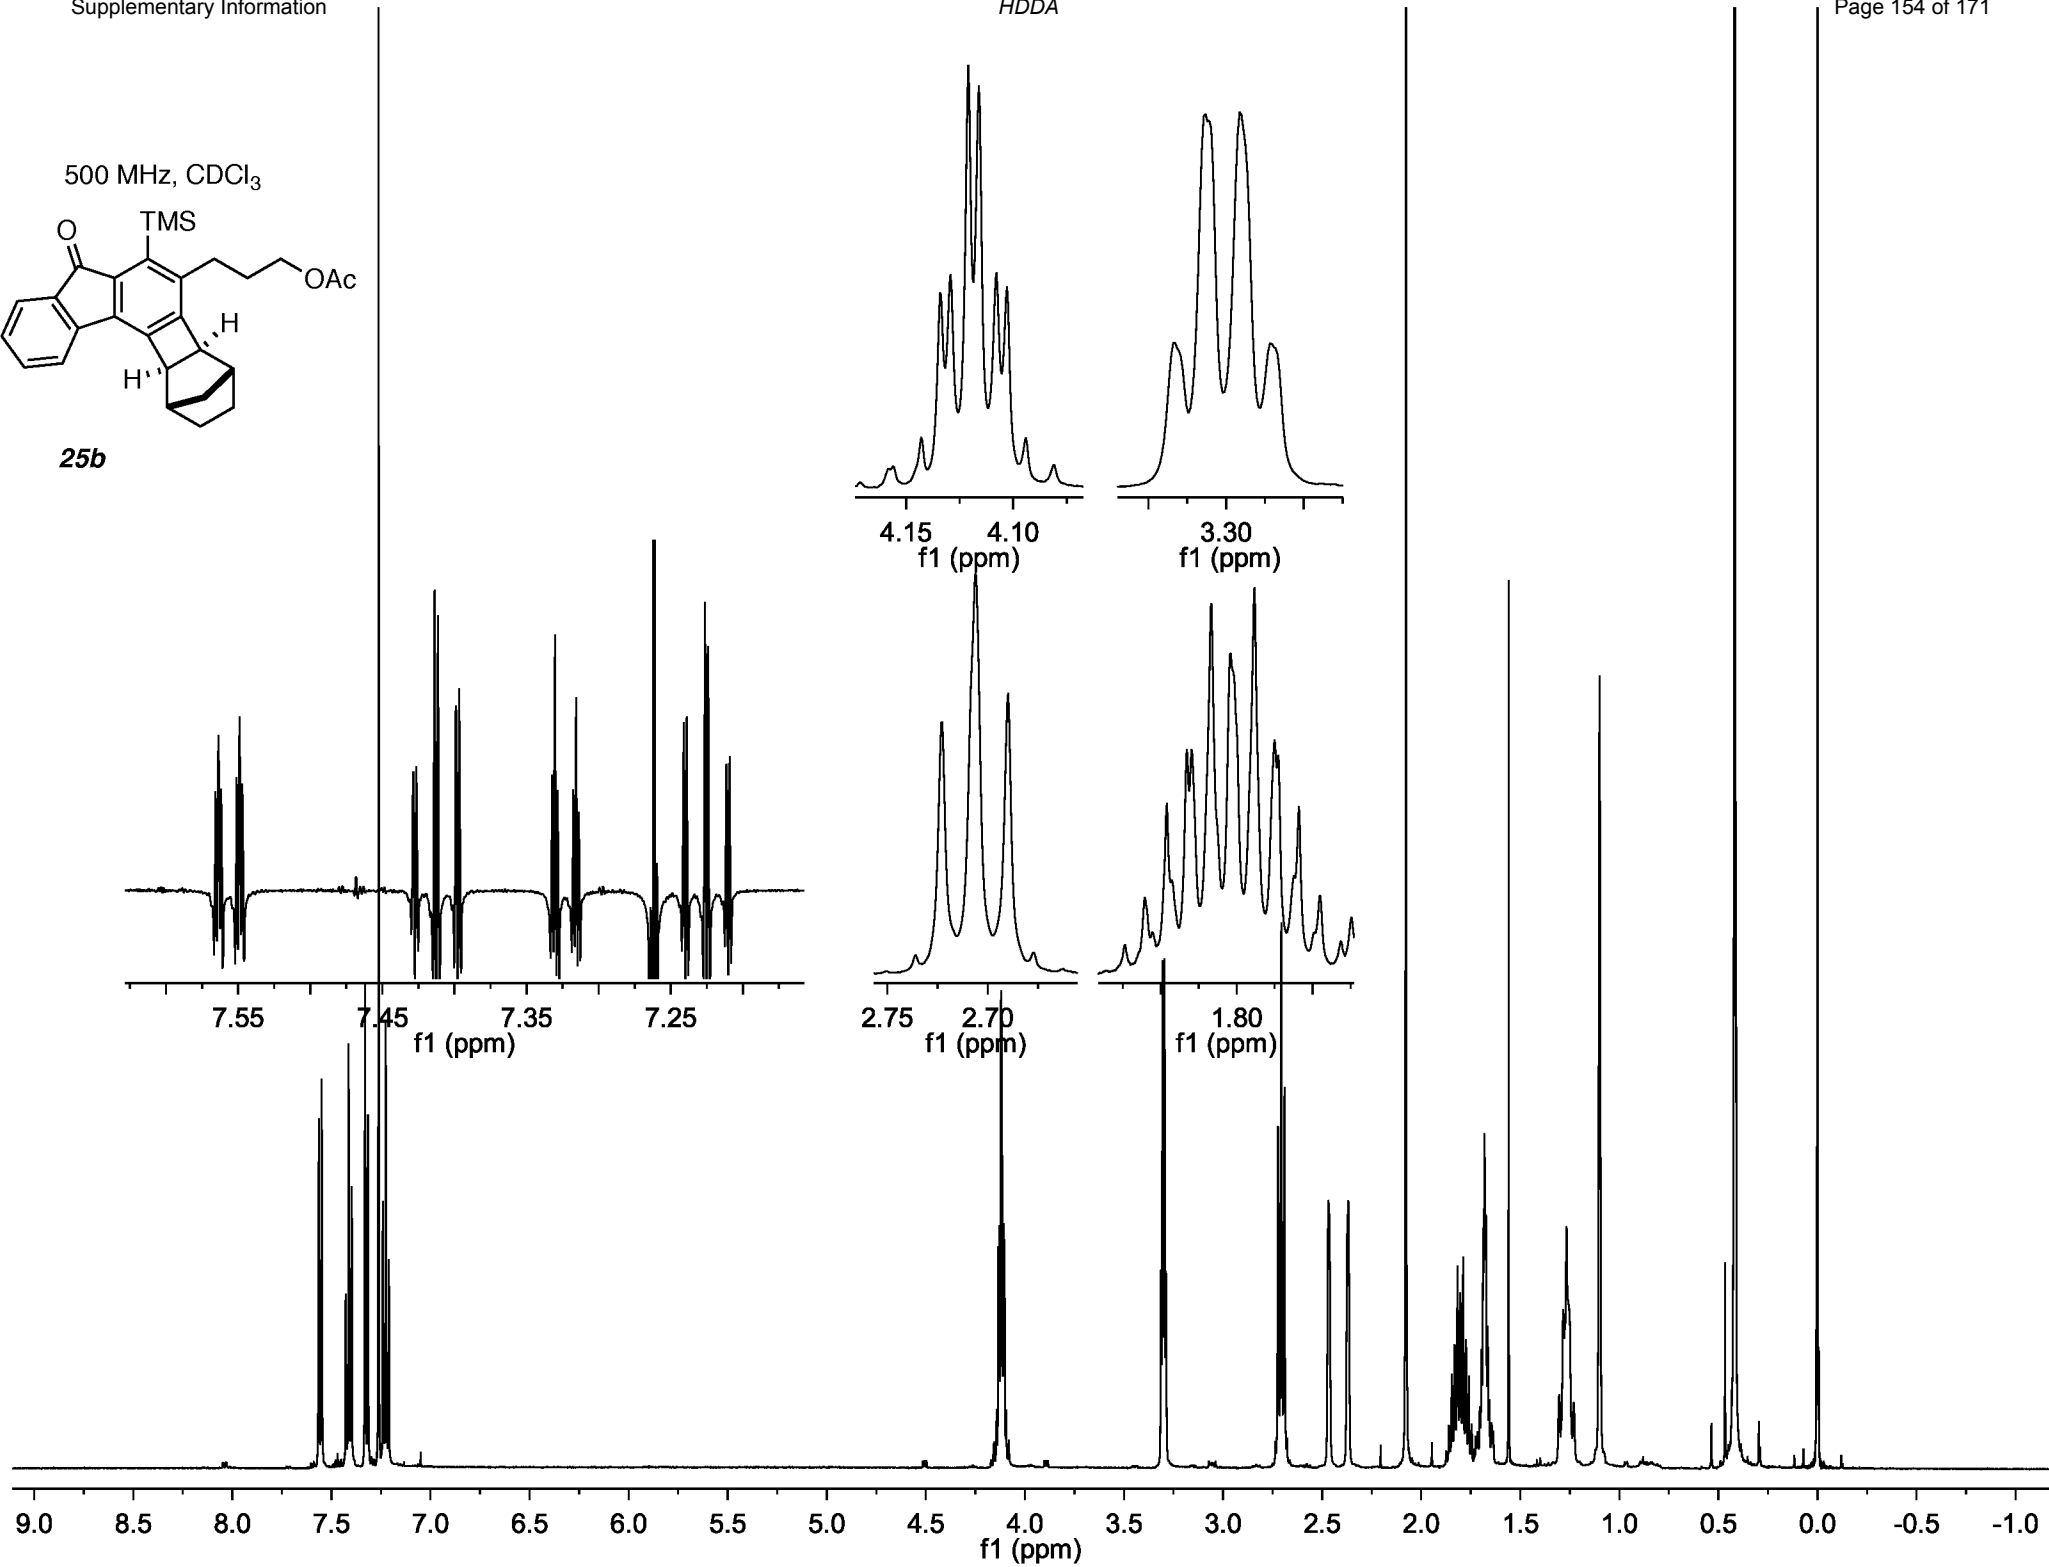

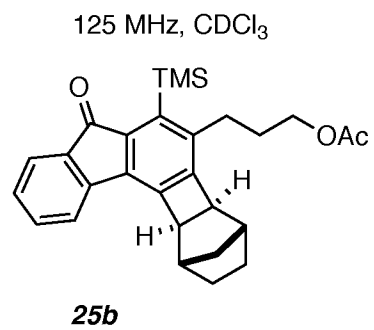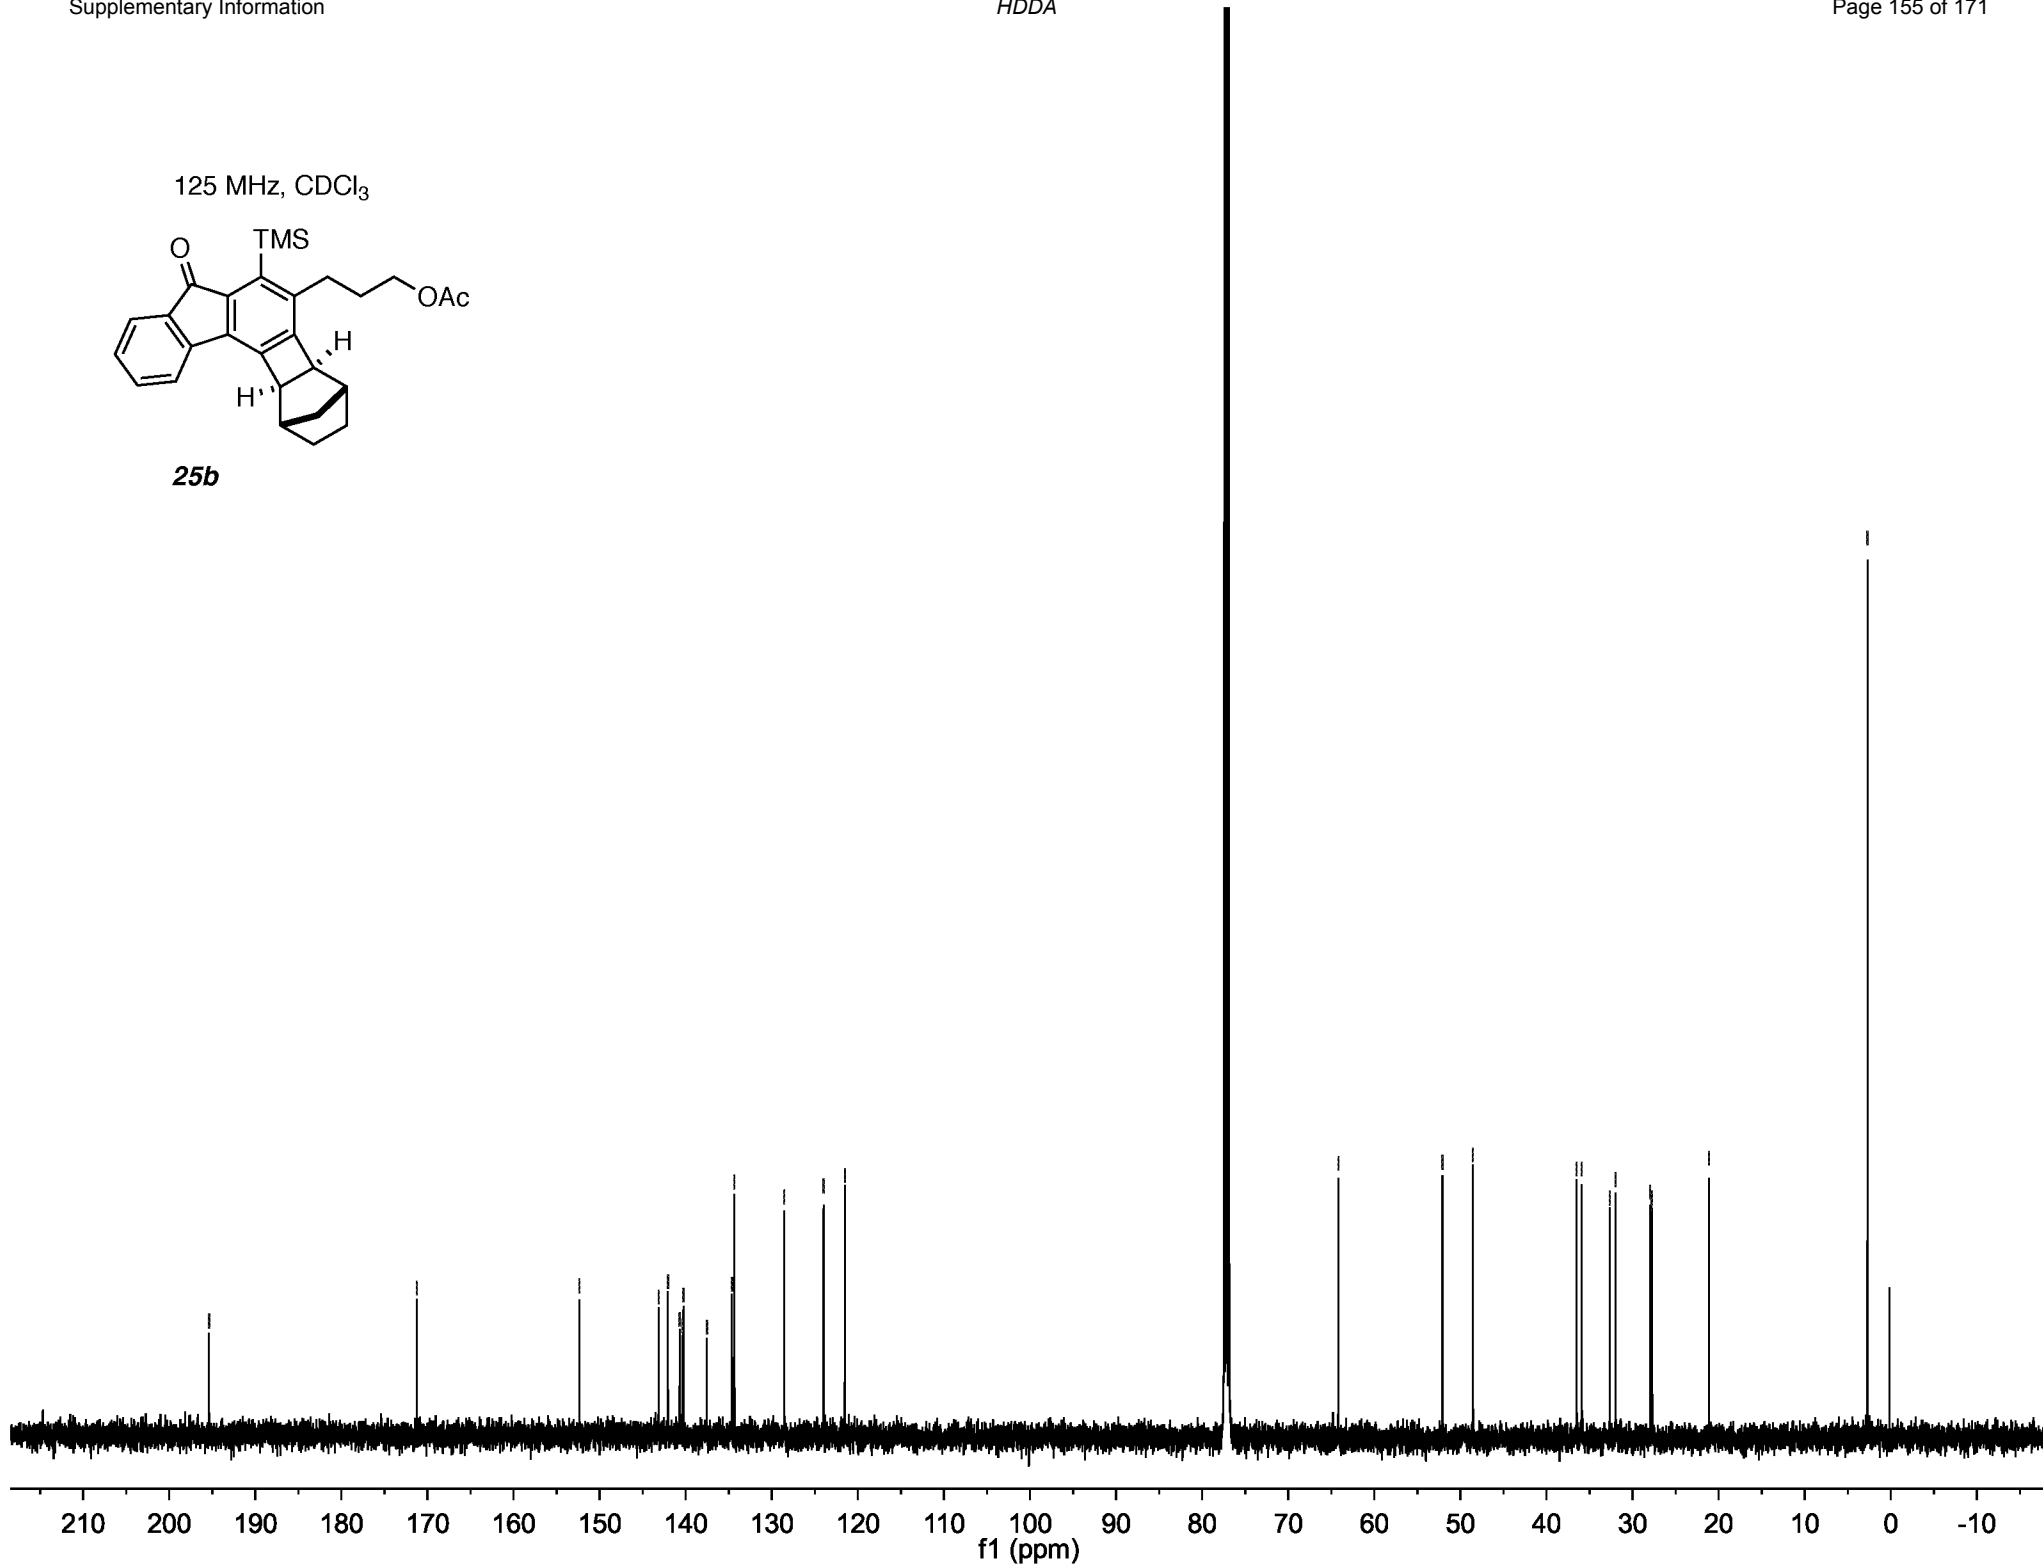

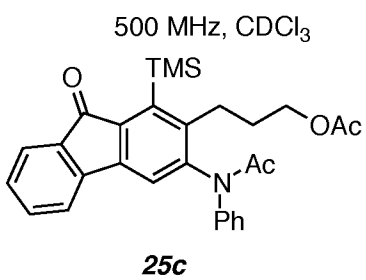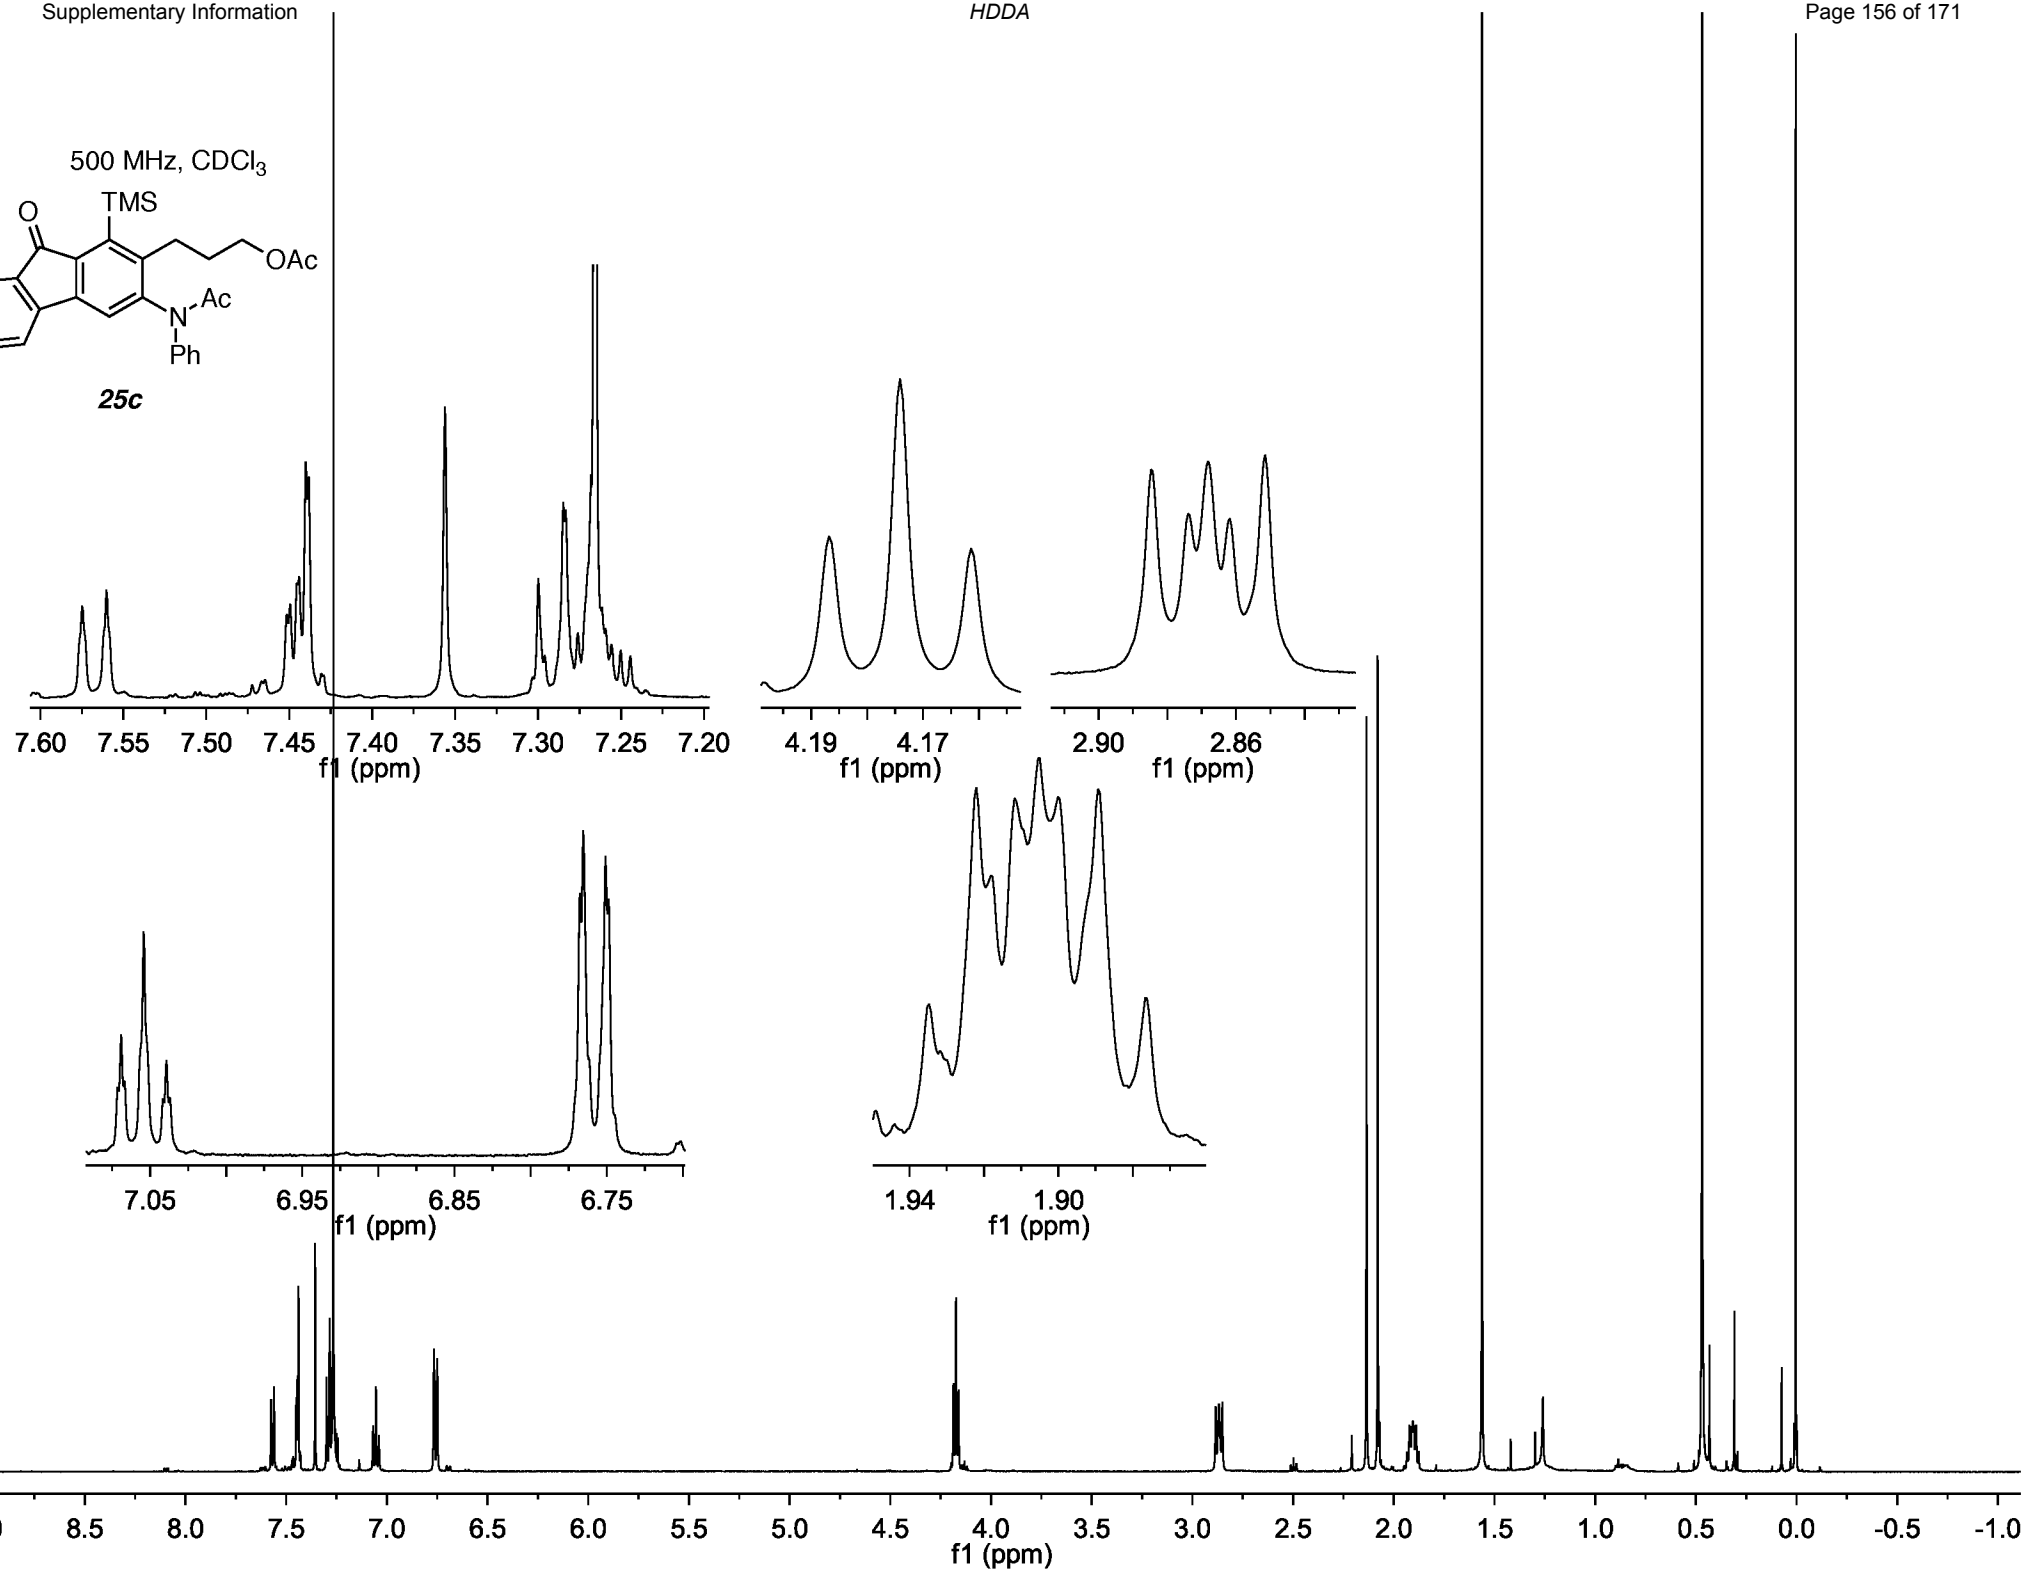

125 MHz, CDCl<sub>3</sub>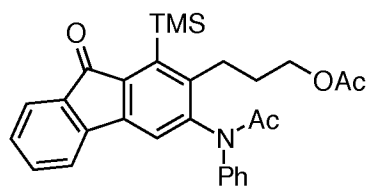**25c**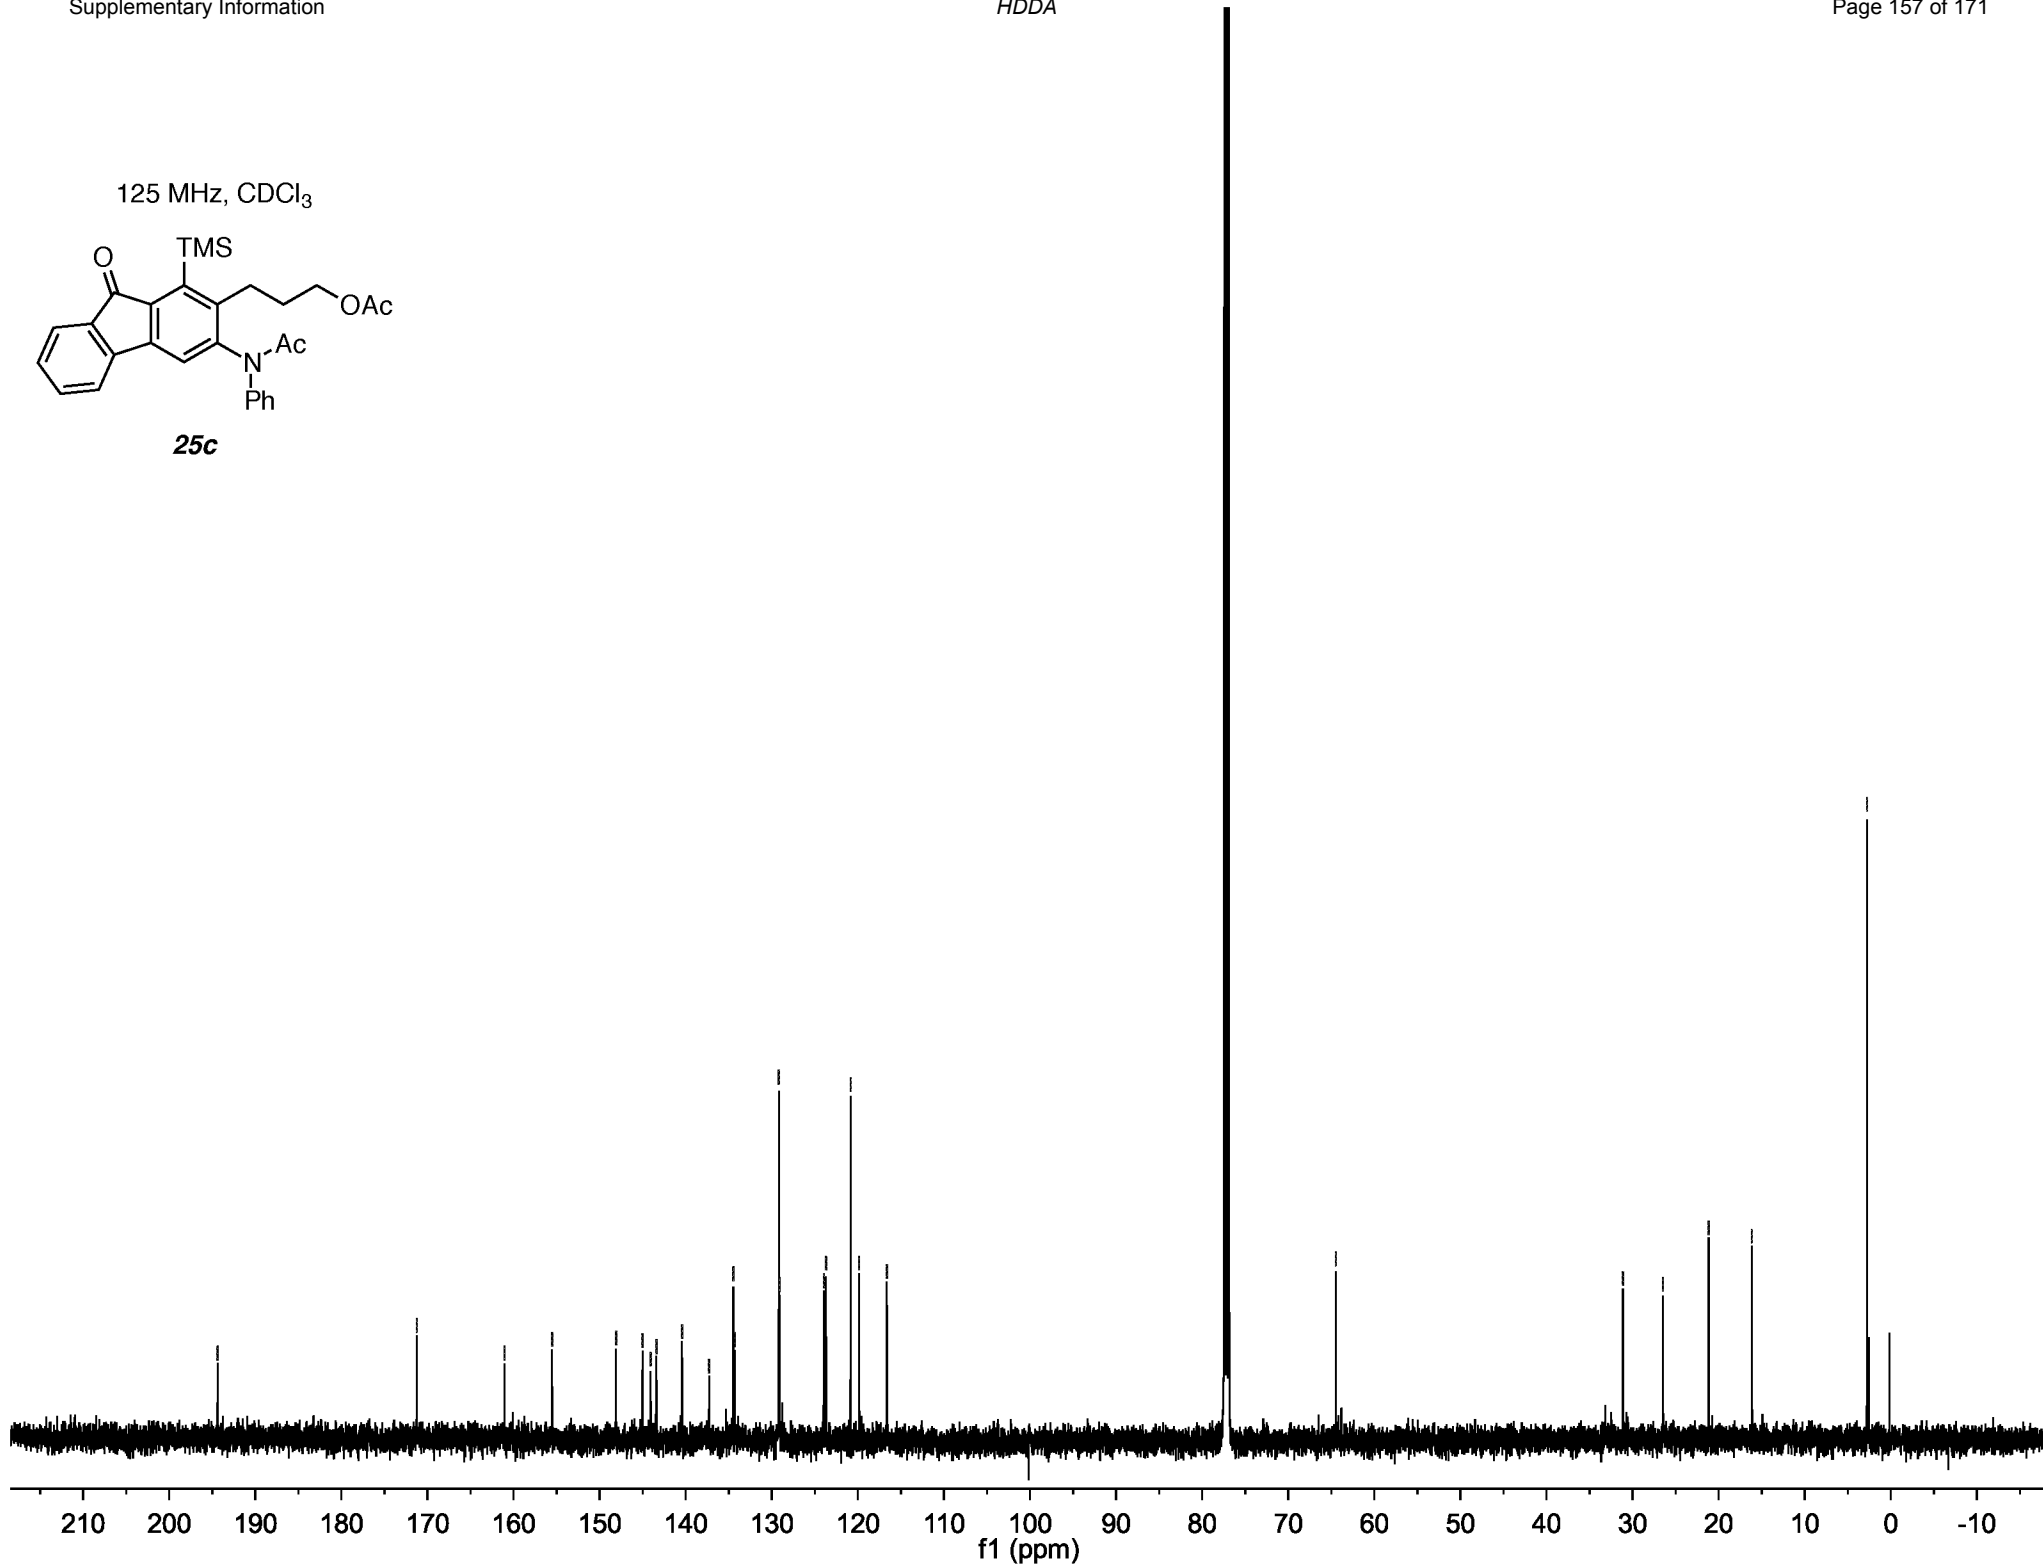

500 MHz, CDCl<sub>3</sub>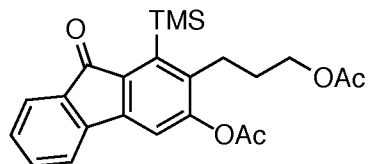**25d**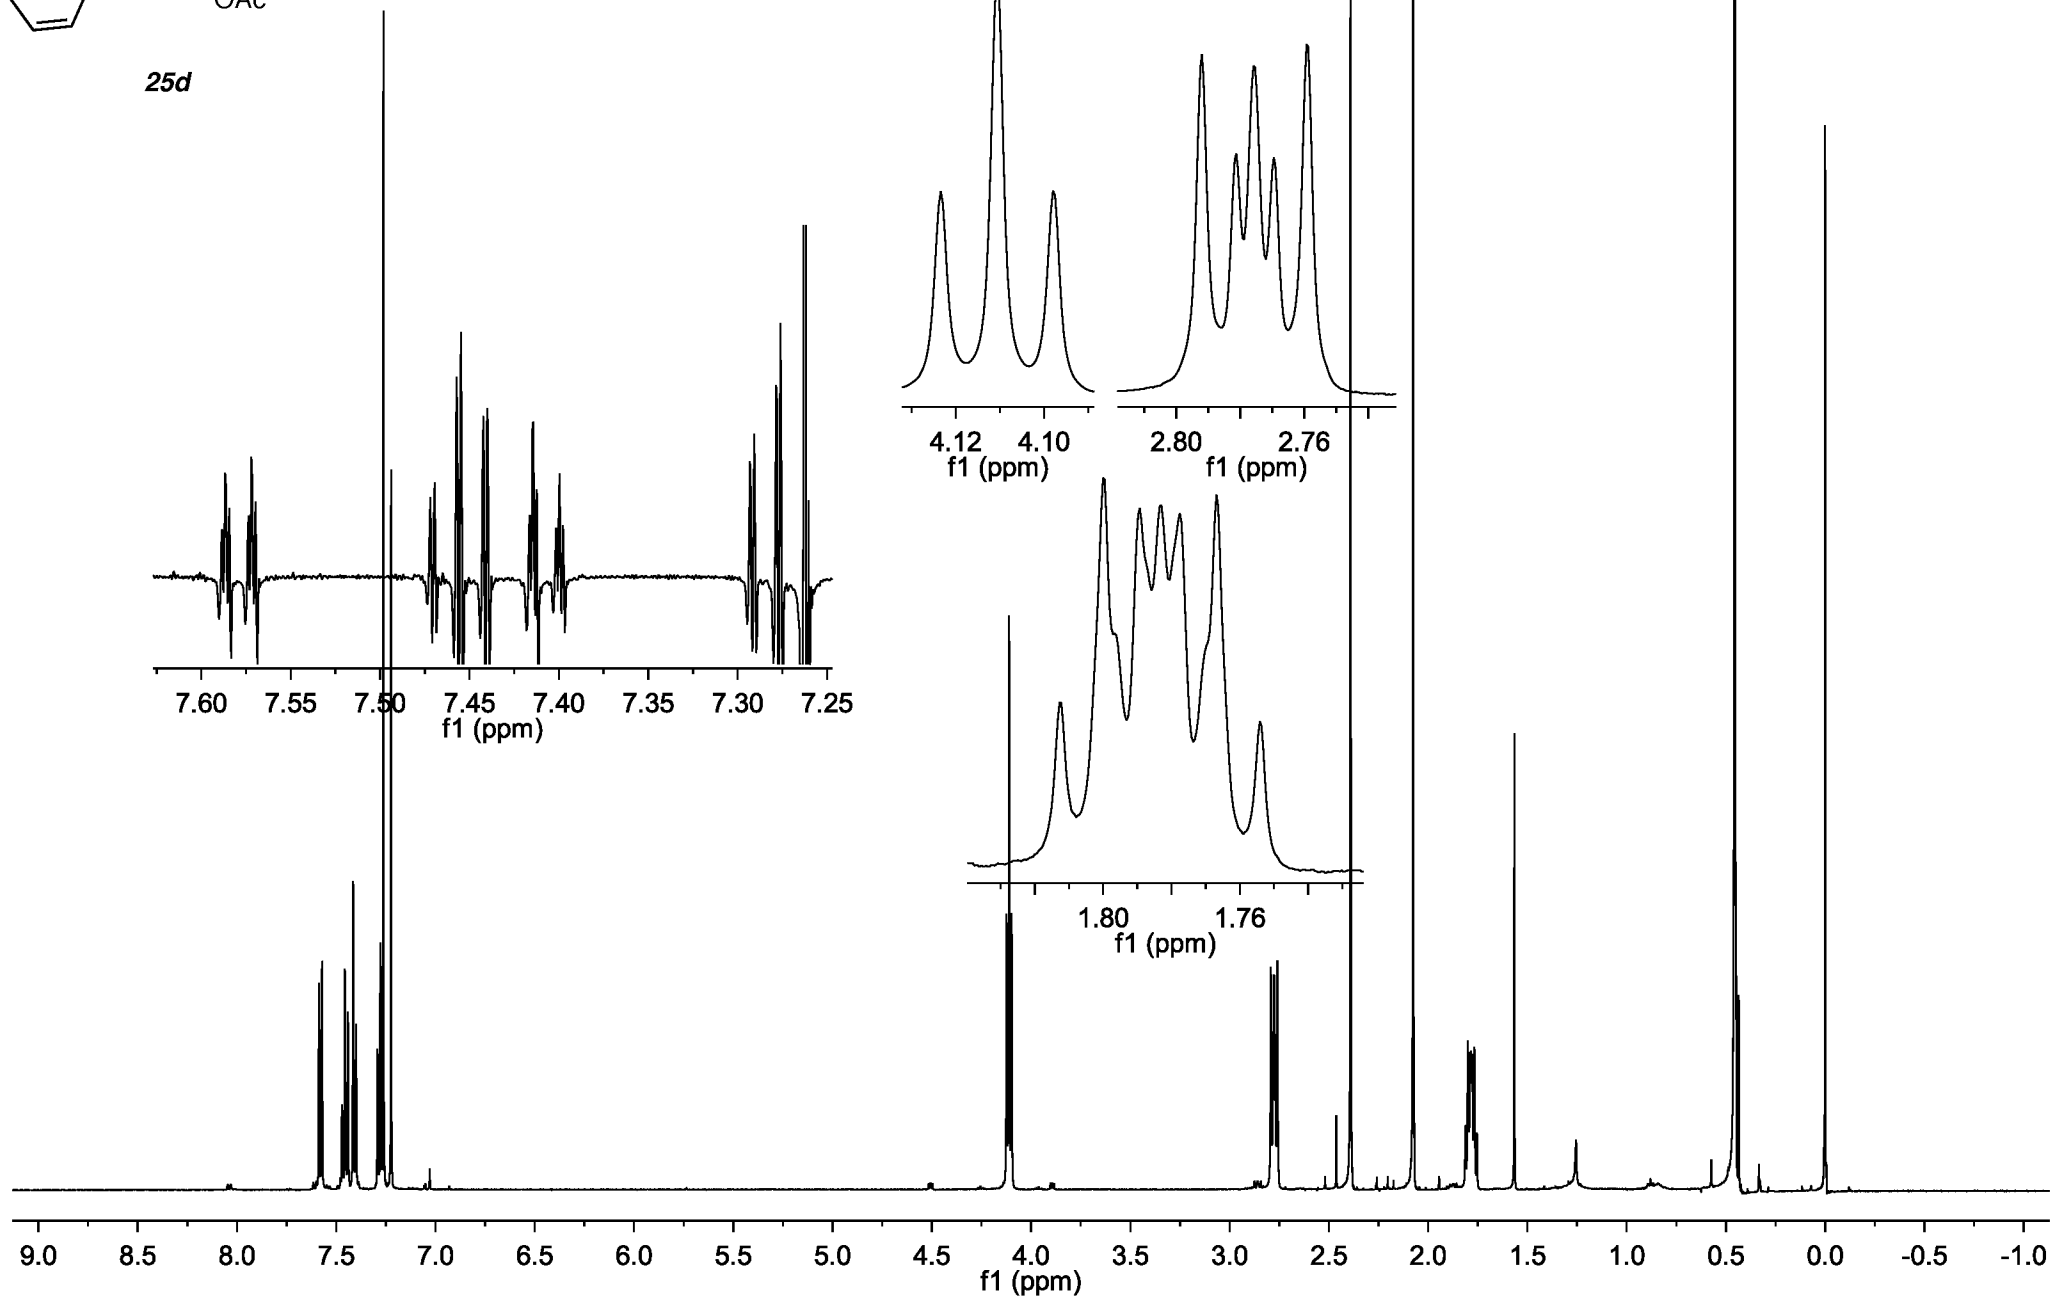

125 MHz, CDCl<sub>3</sub>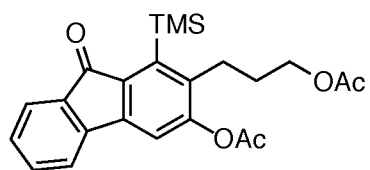**25d**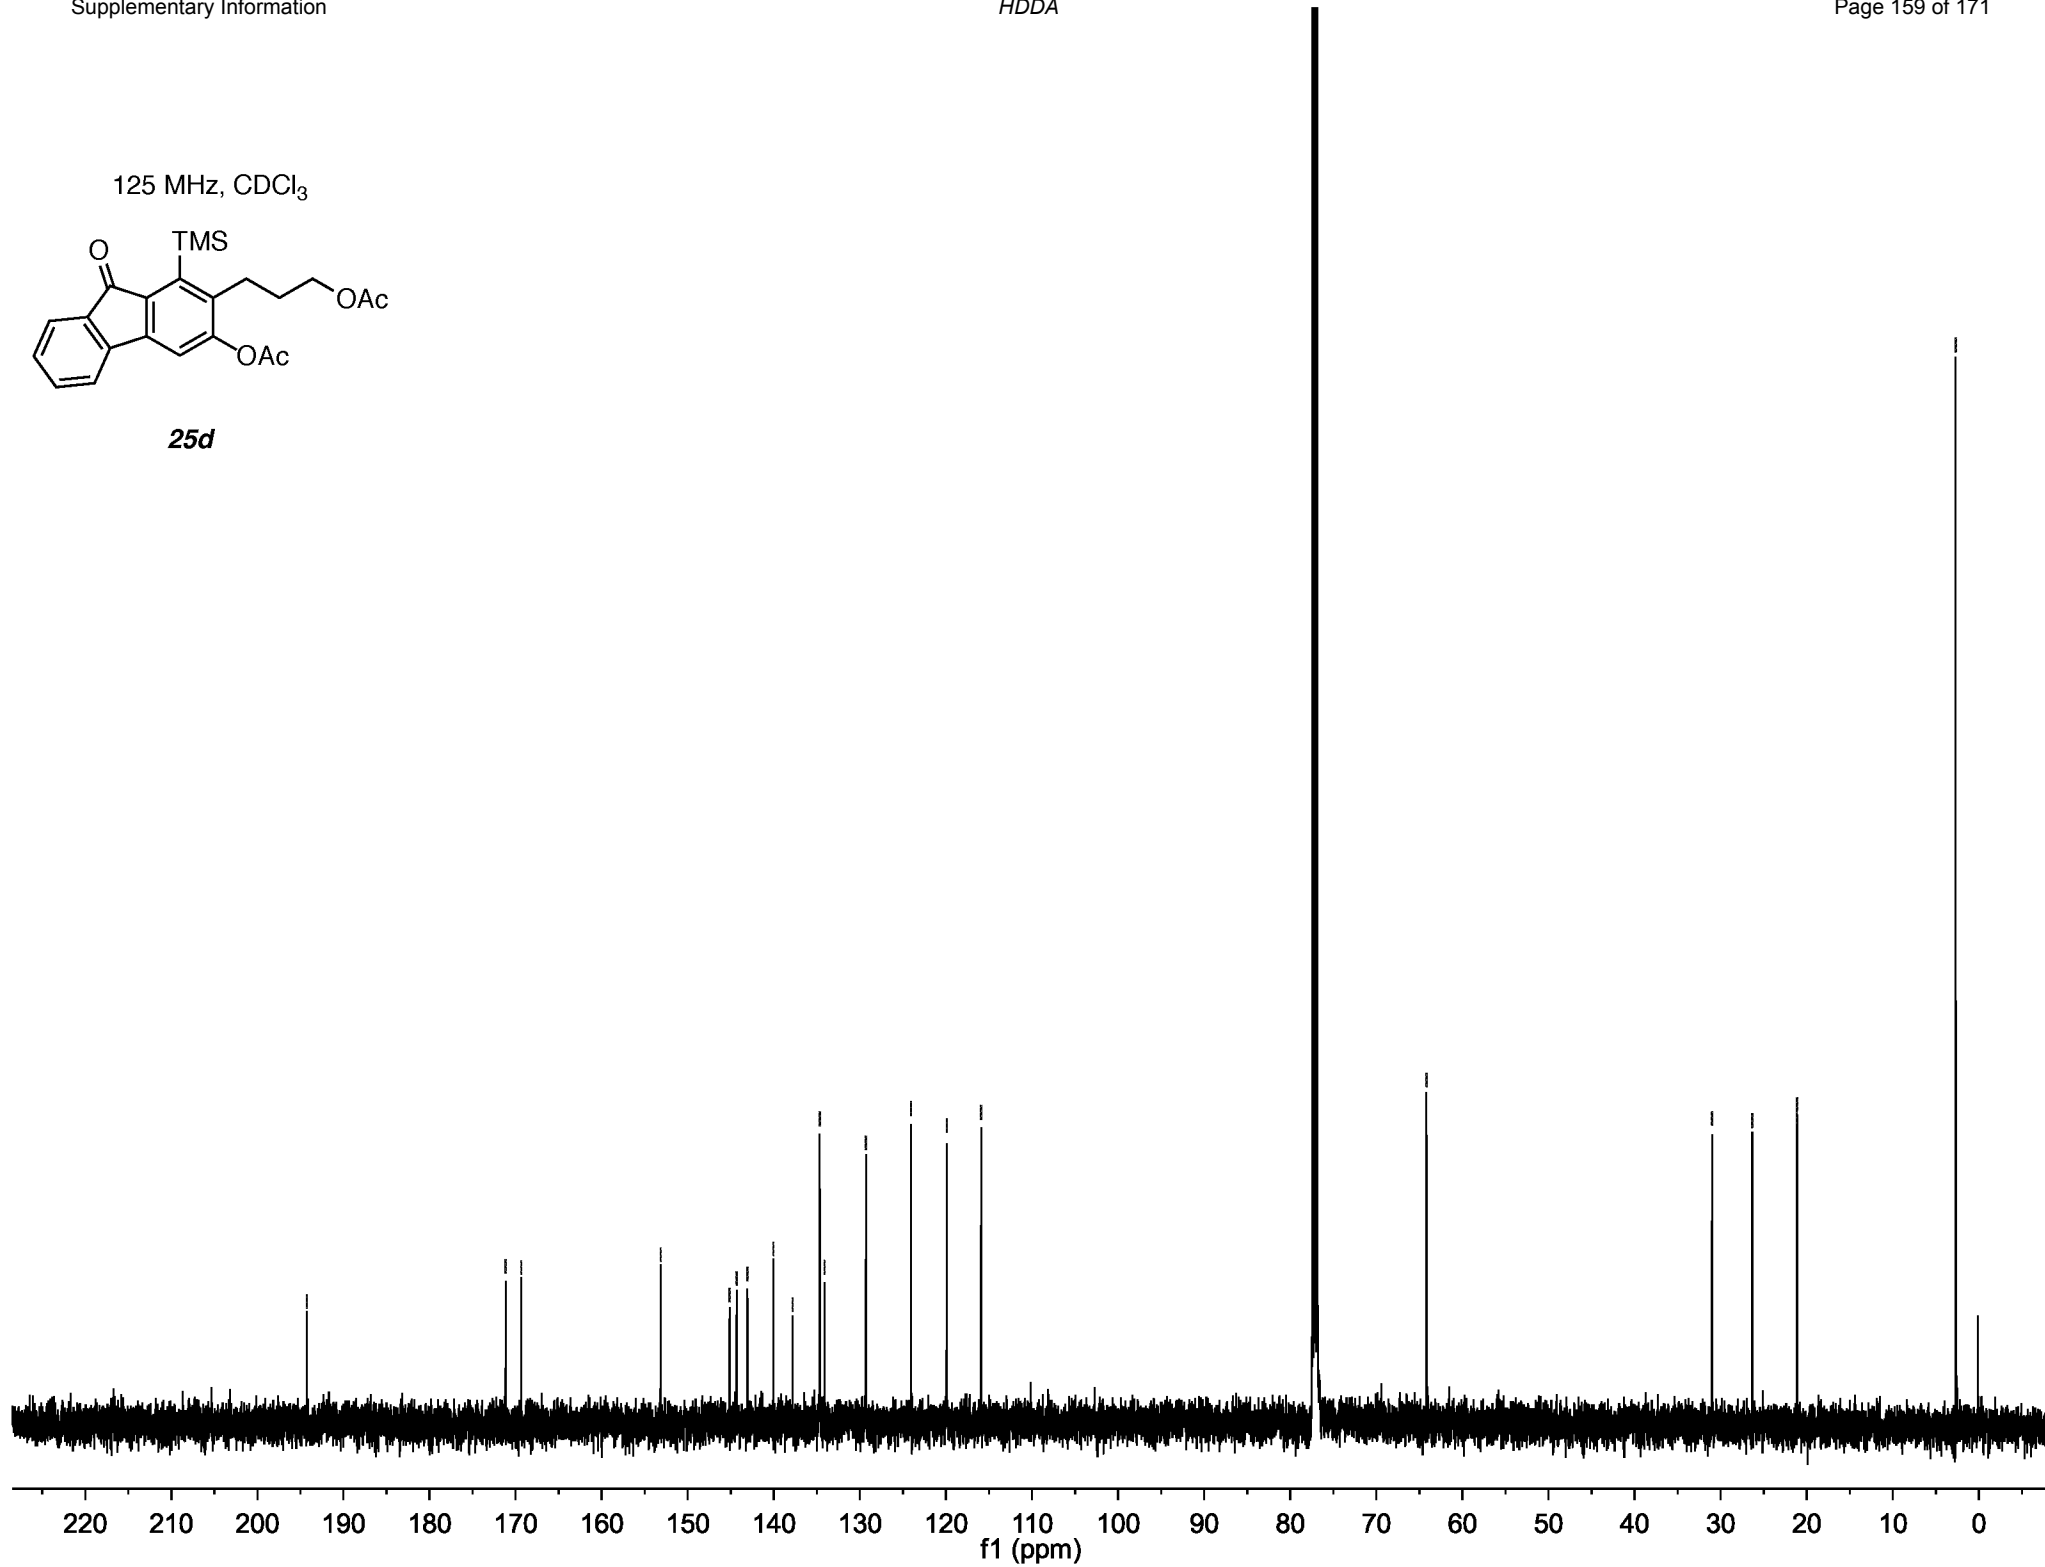

500 MHz, CDCl<sub>3</sub>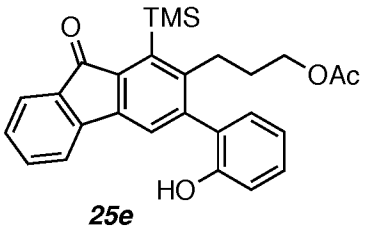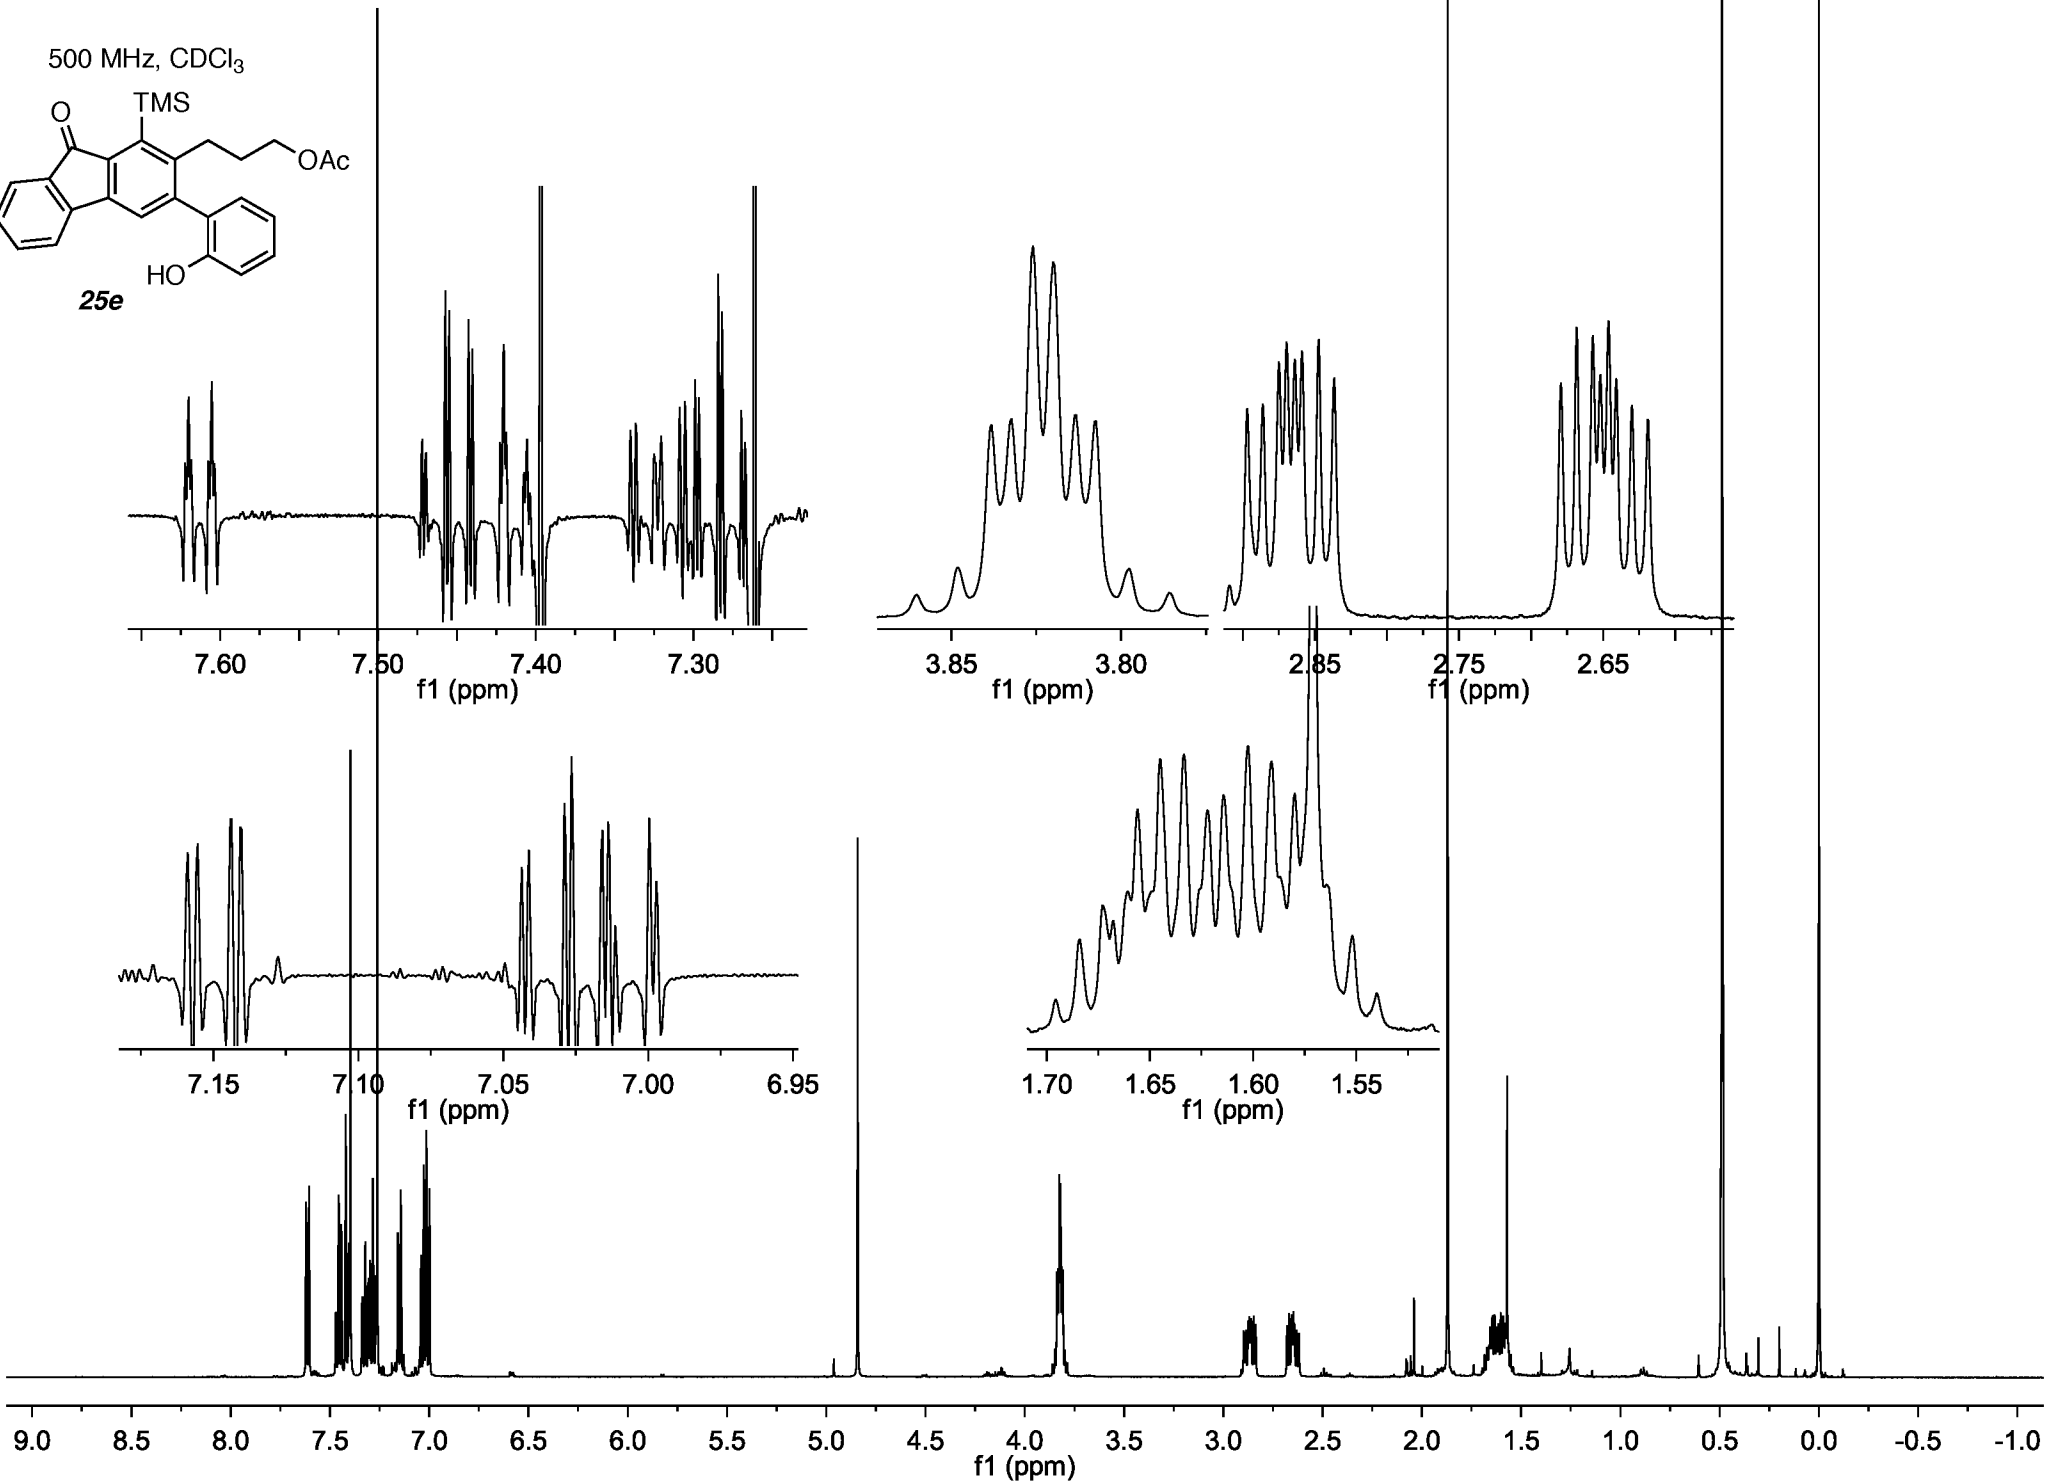



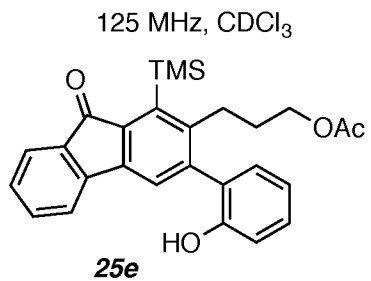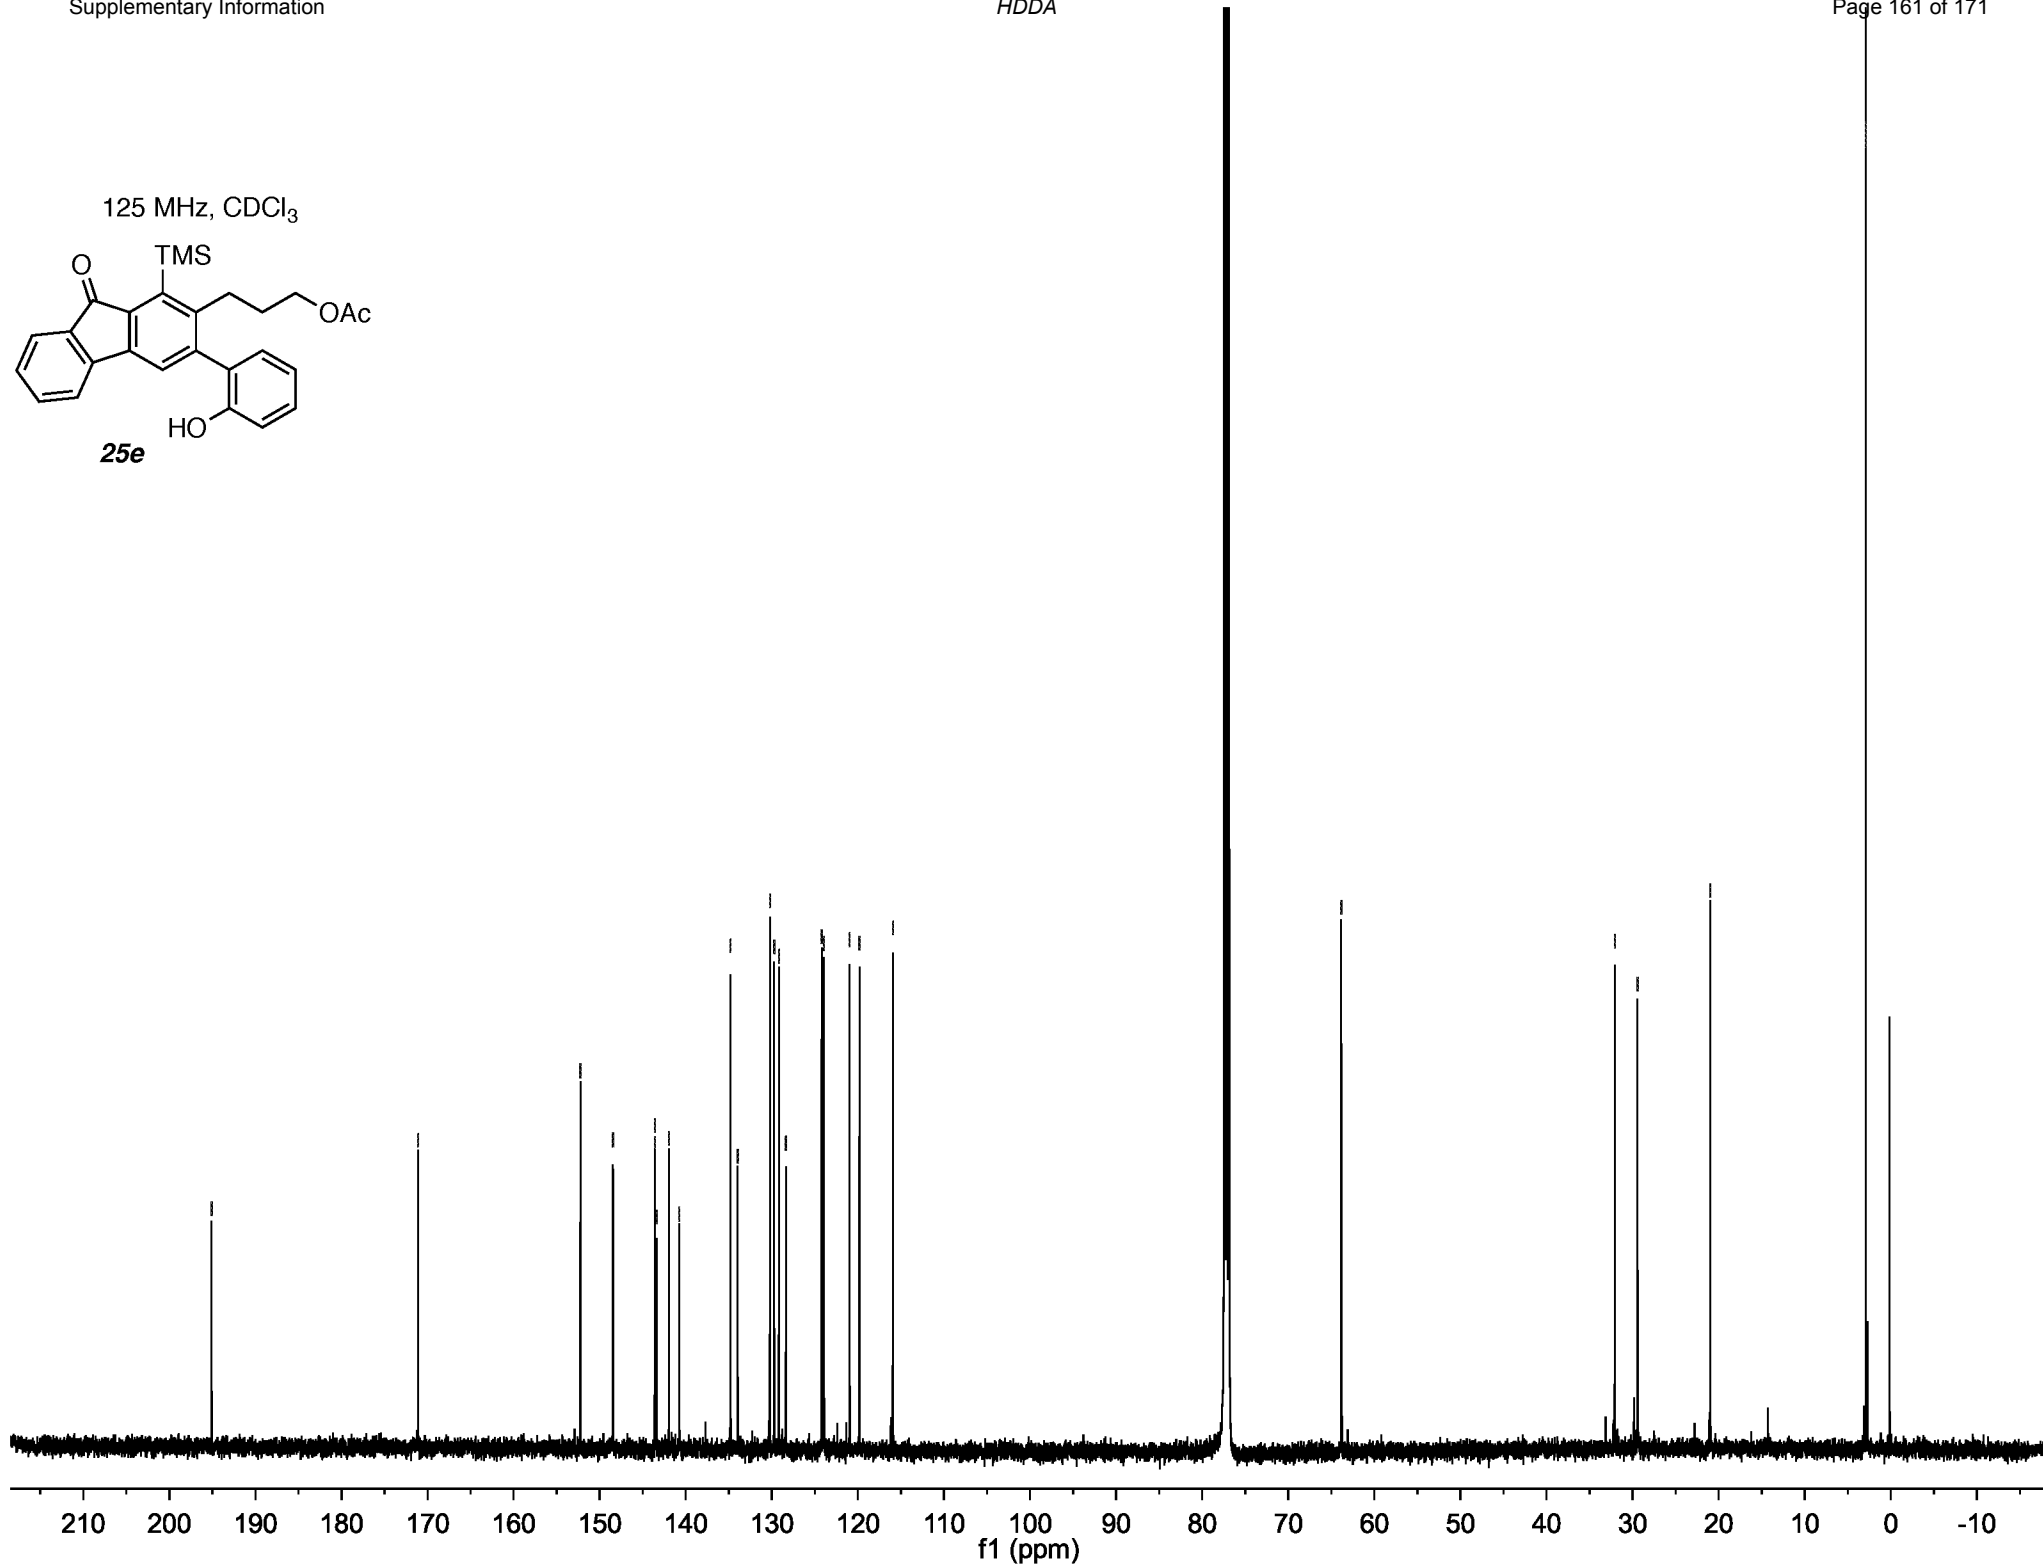

500 MHz, CDCl<sub>3</sub>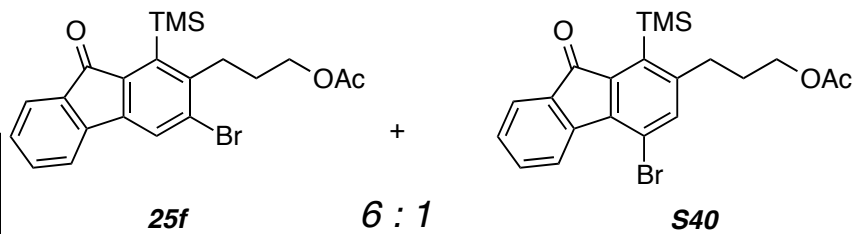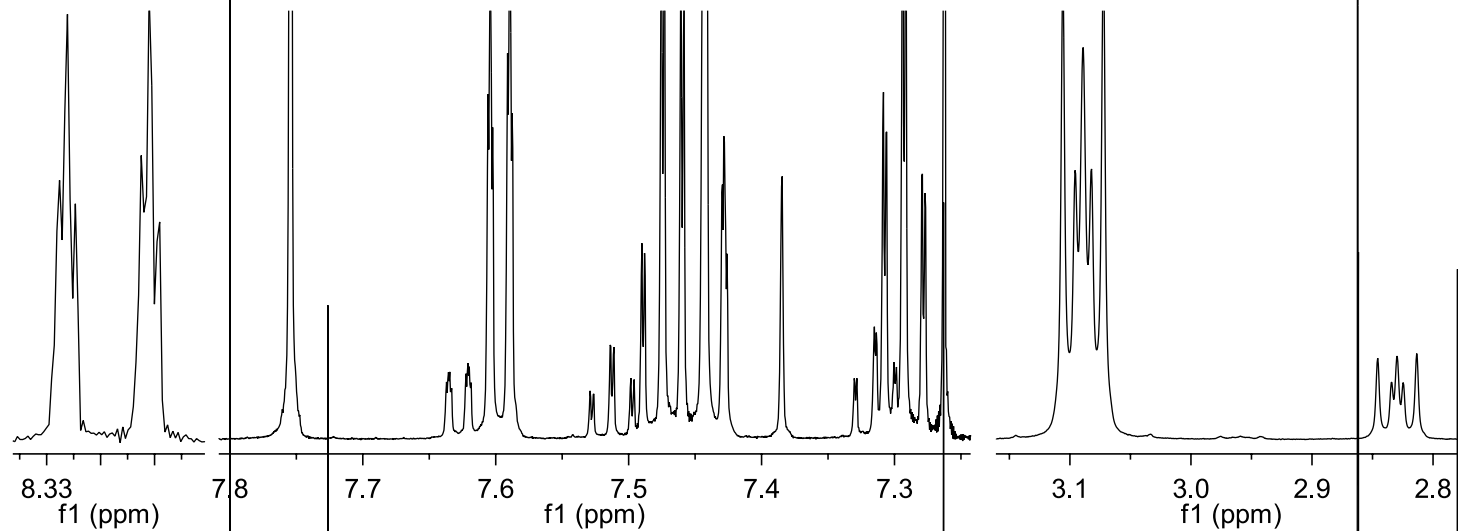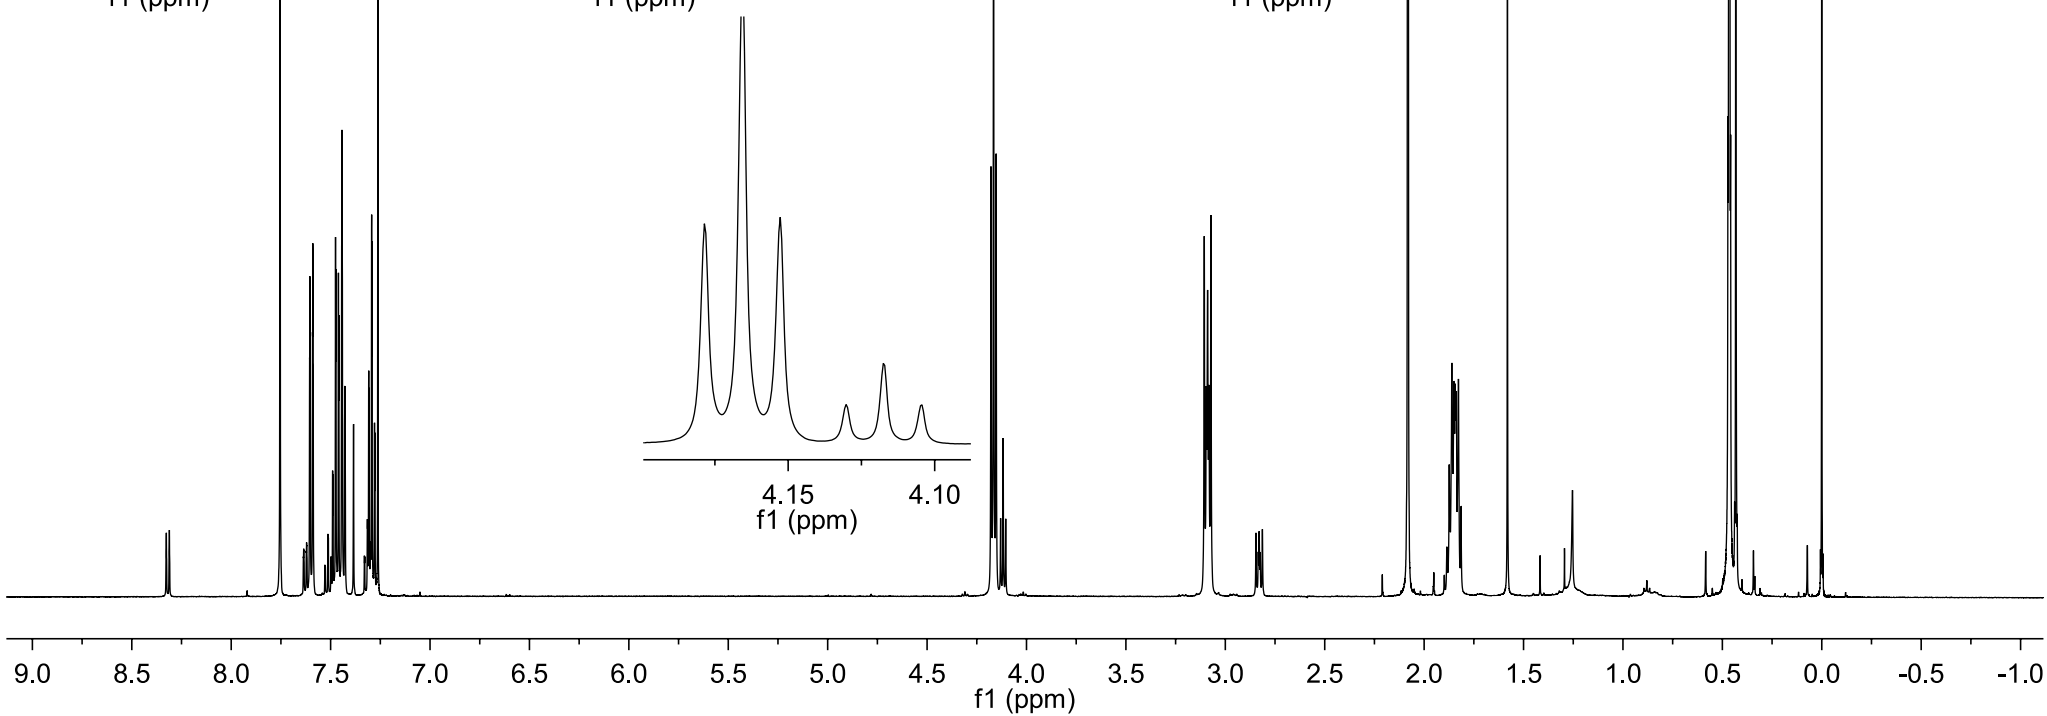

125 MHz, CDCl<sub>3</sub>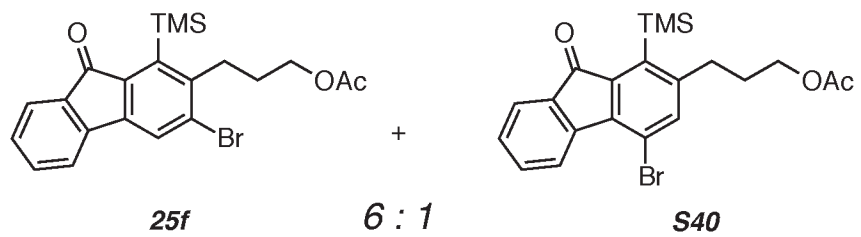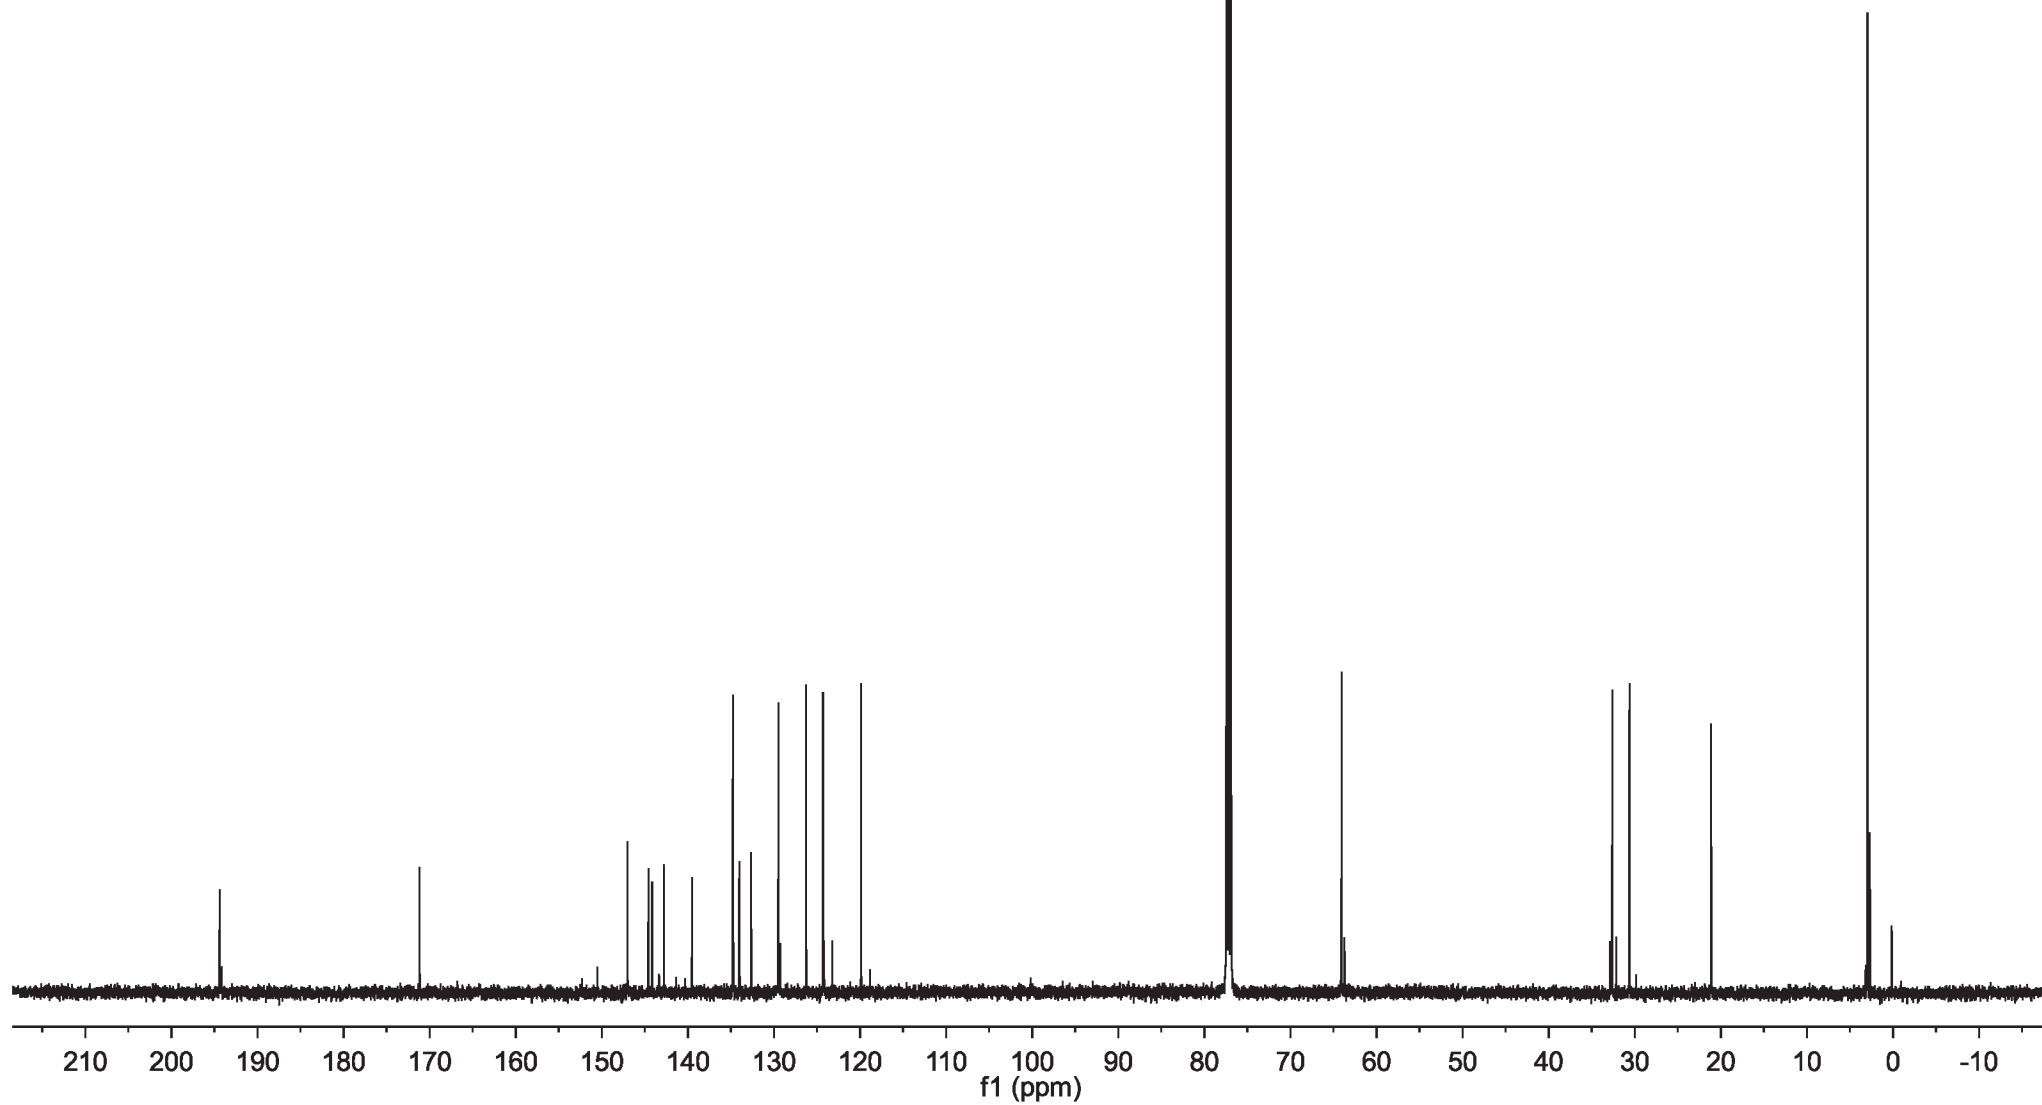

500 MHz, CDCl<sub>3</sub>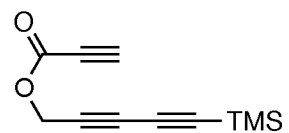**S41**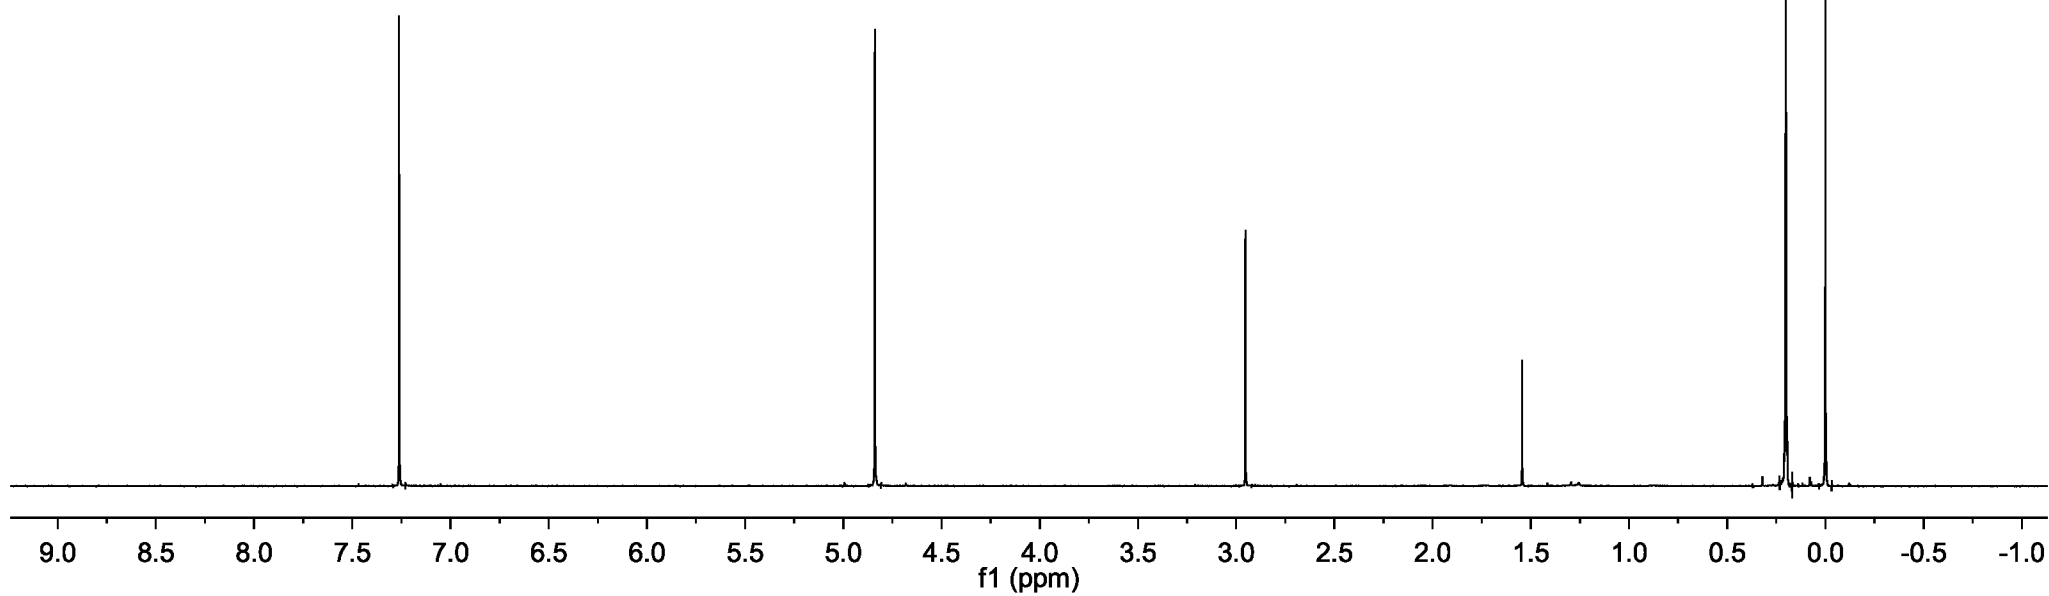

125 MHz, CDCl<sub>3</sub>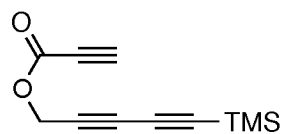**S41**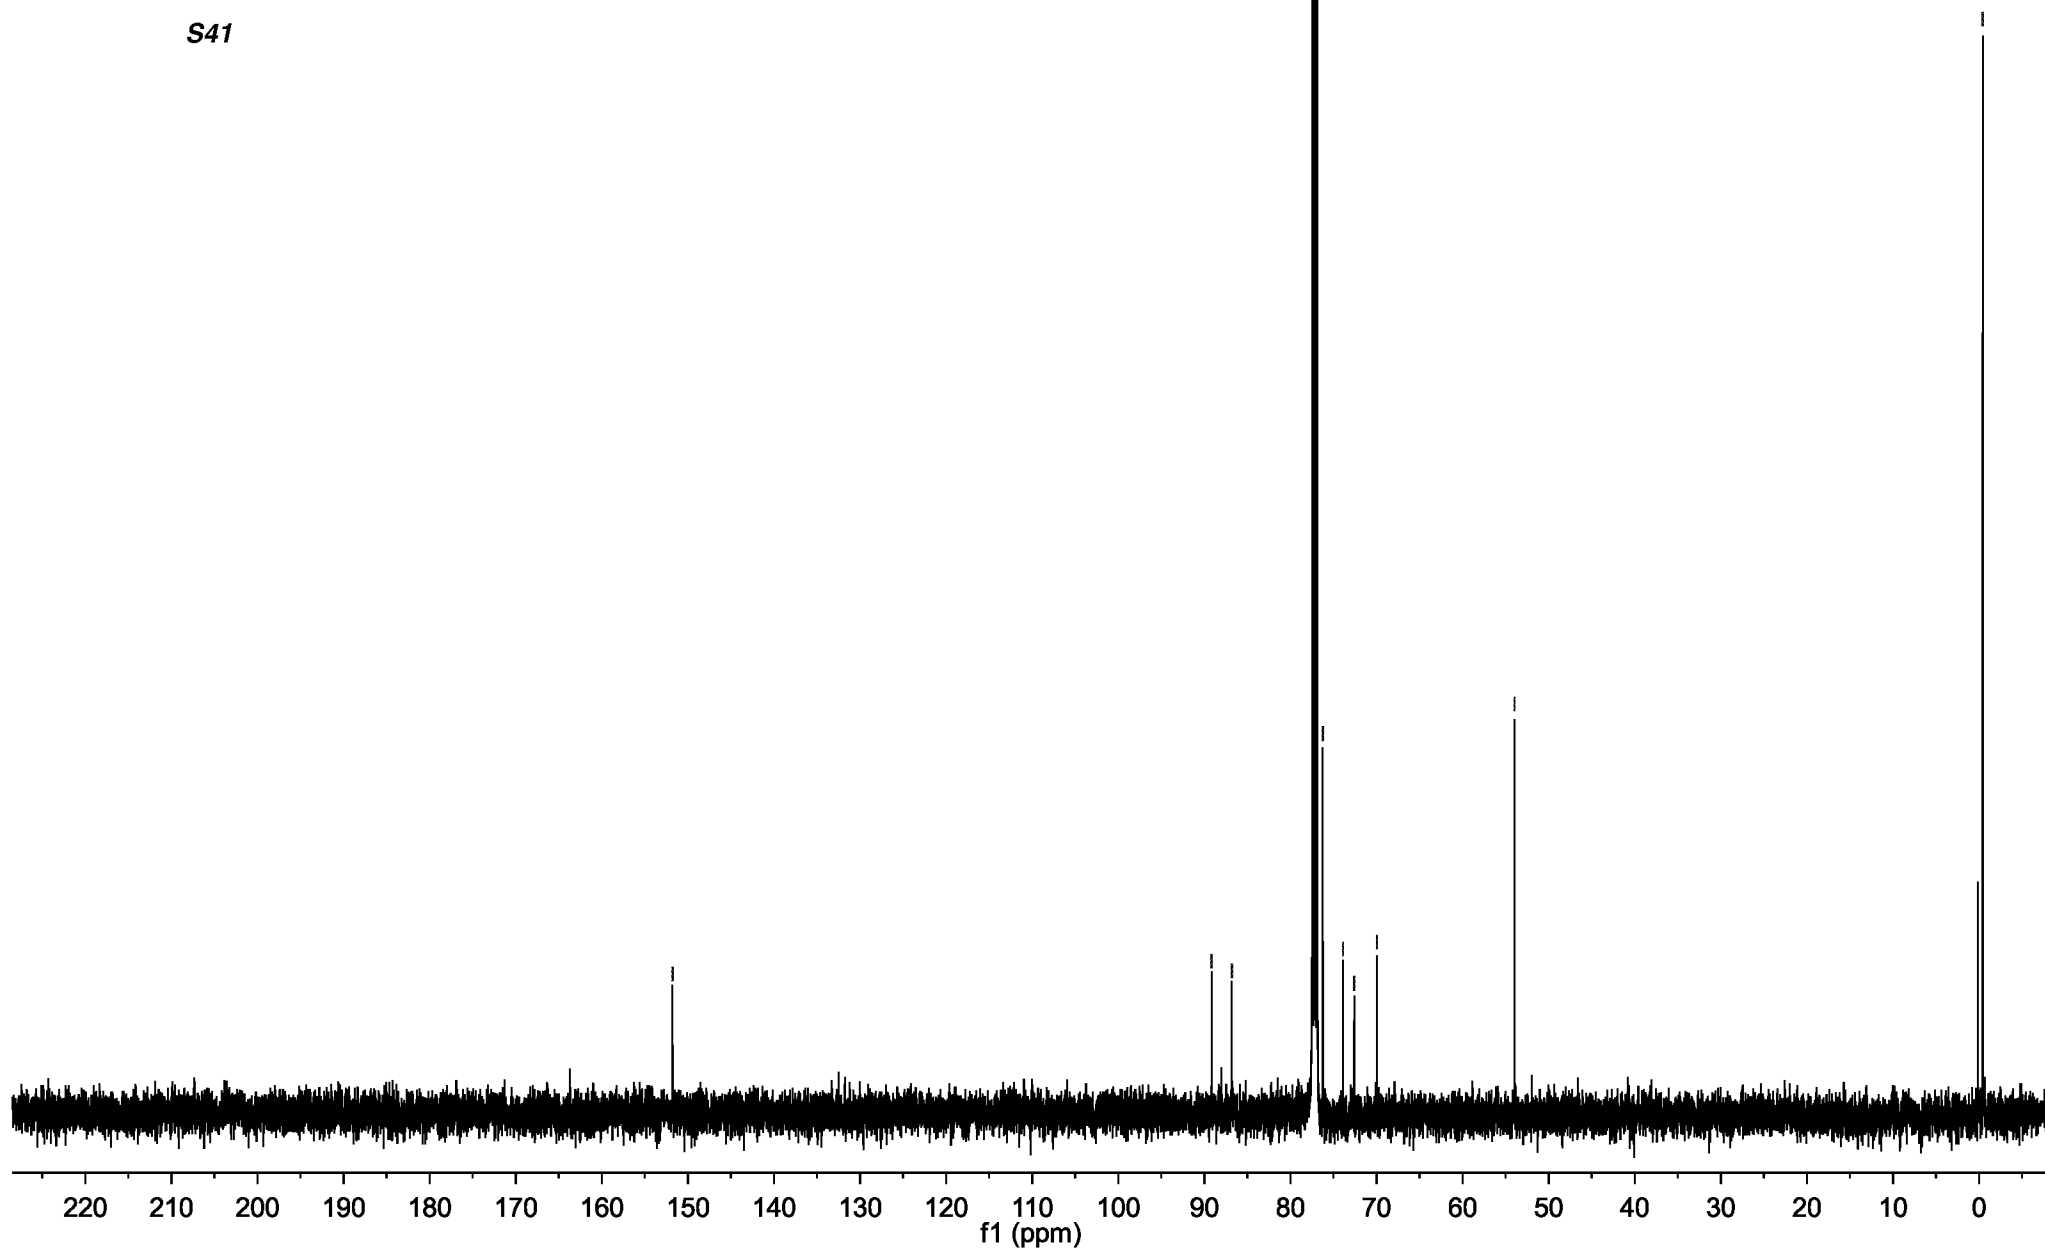

500 MHz, CDCl<sub>3</sub>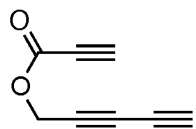**26**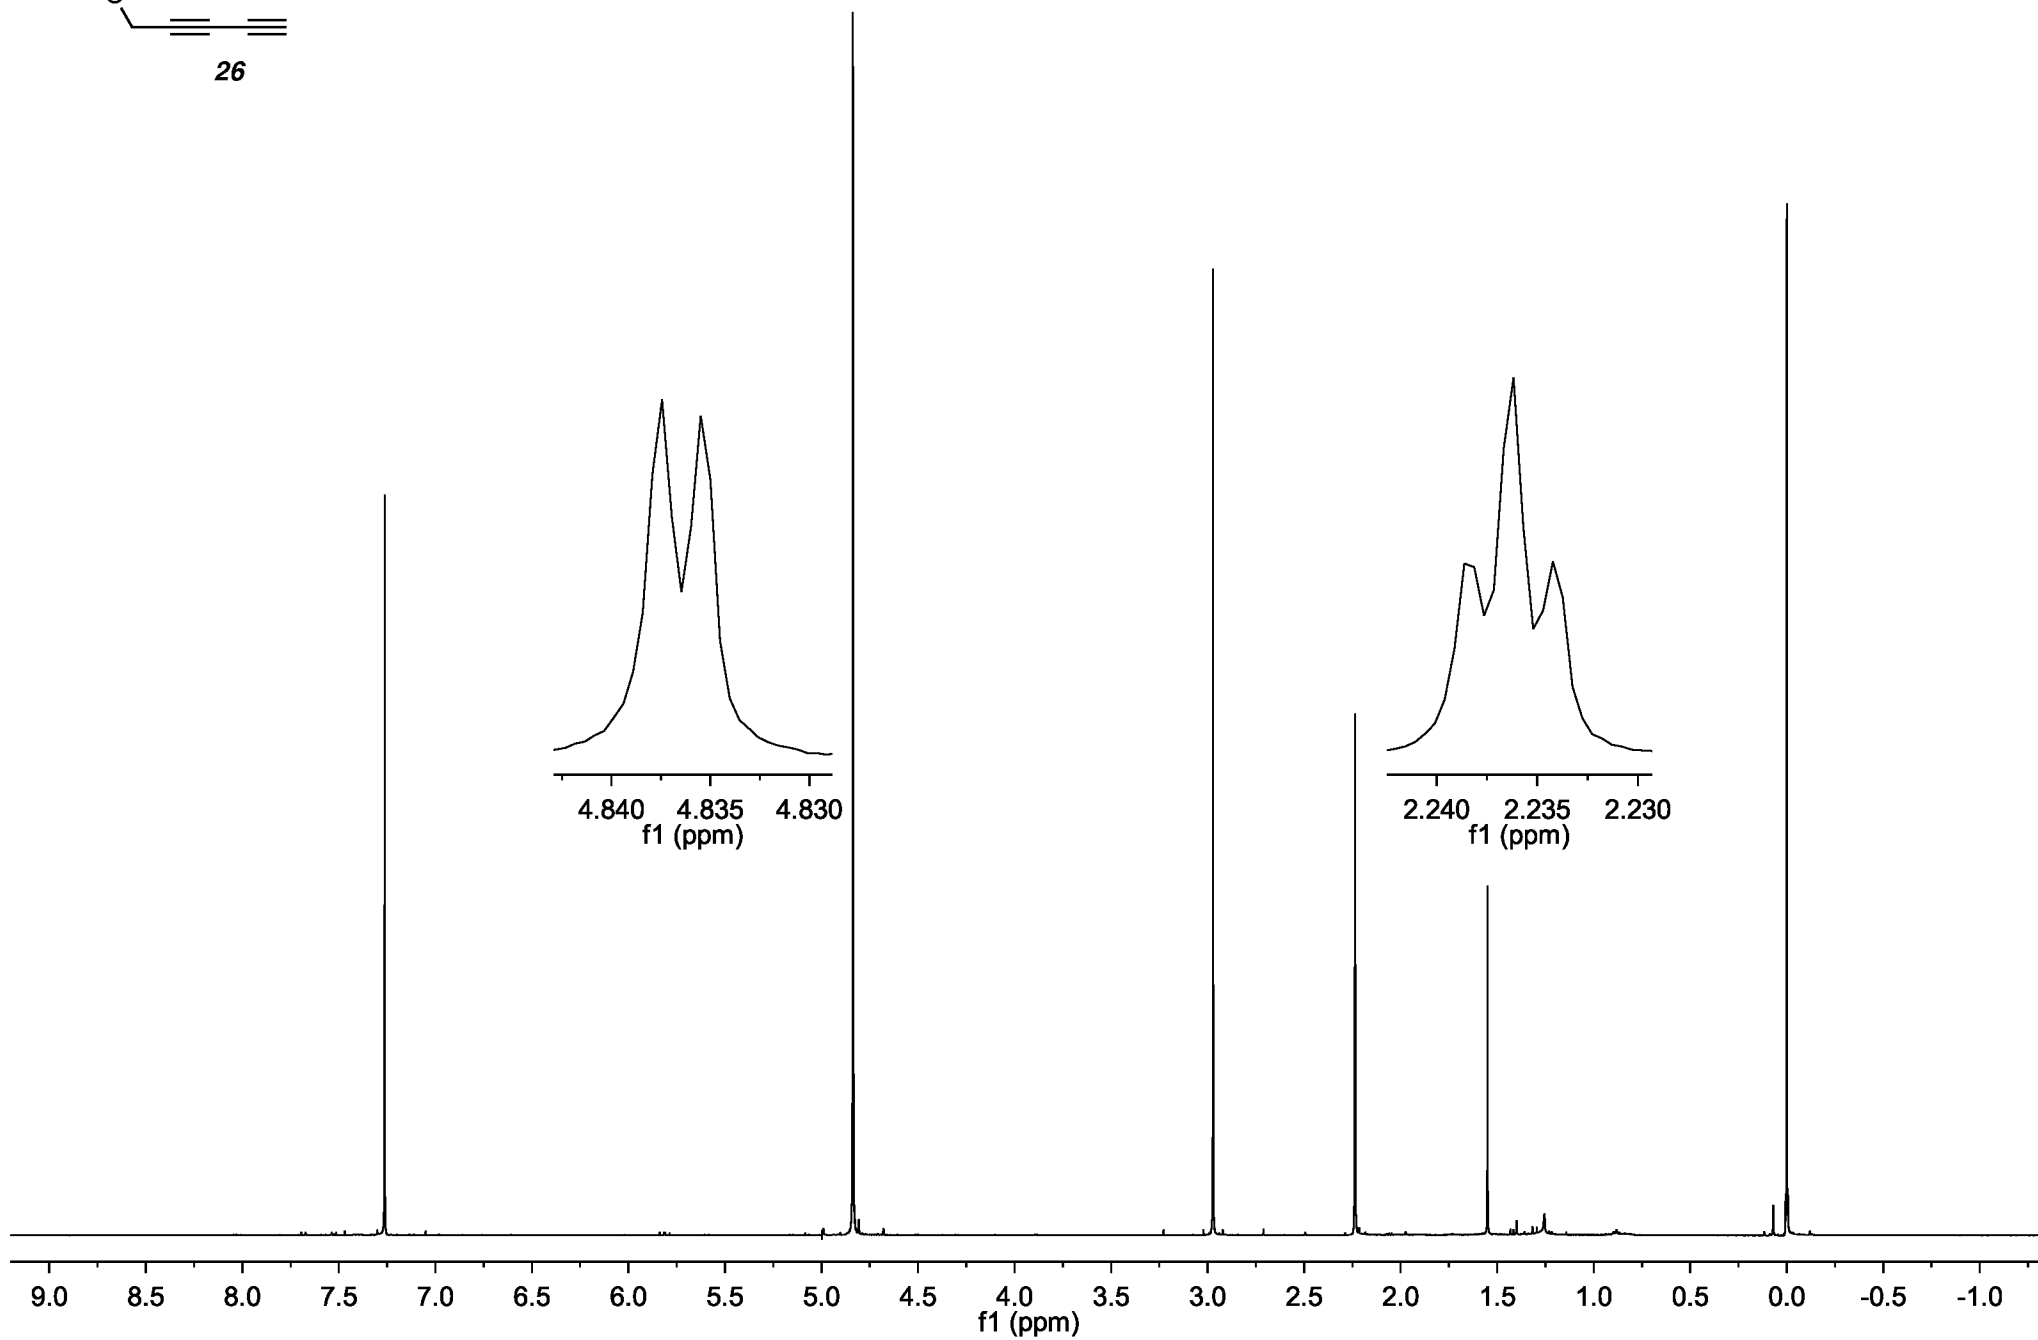

125 MHz, CDCl<sub>3</sub>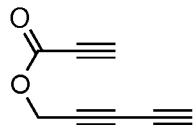**26**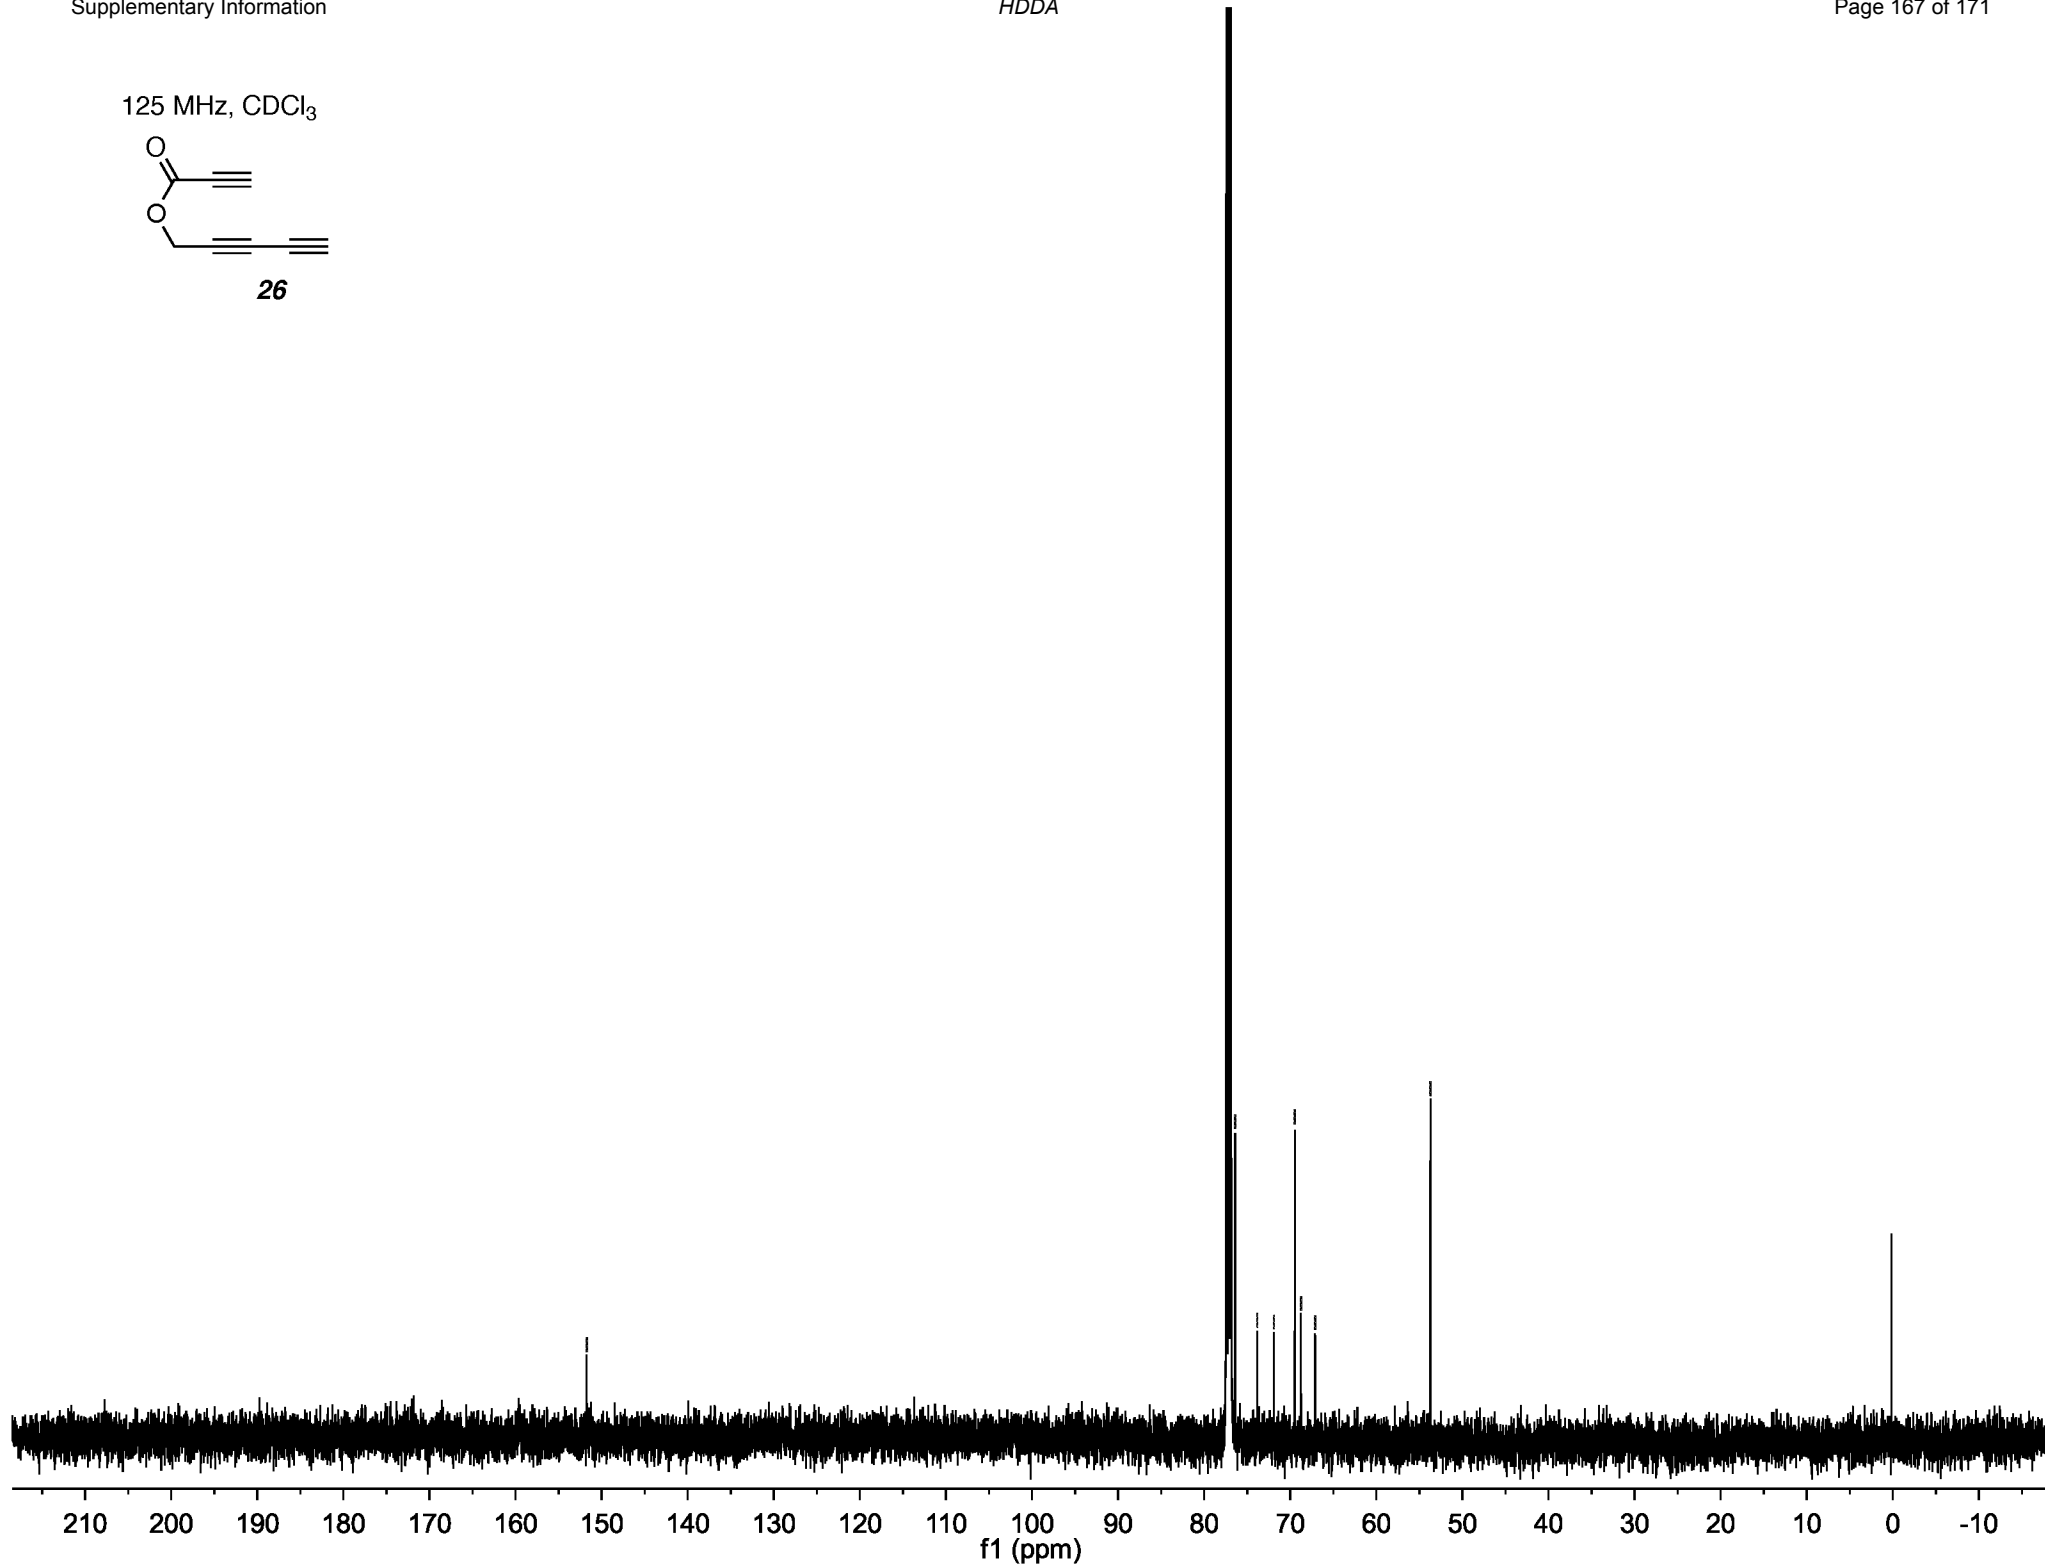

500 MHz, CDCl<sub>3</sub>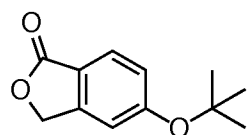**28**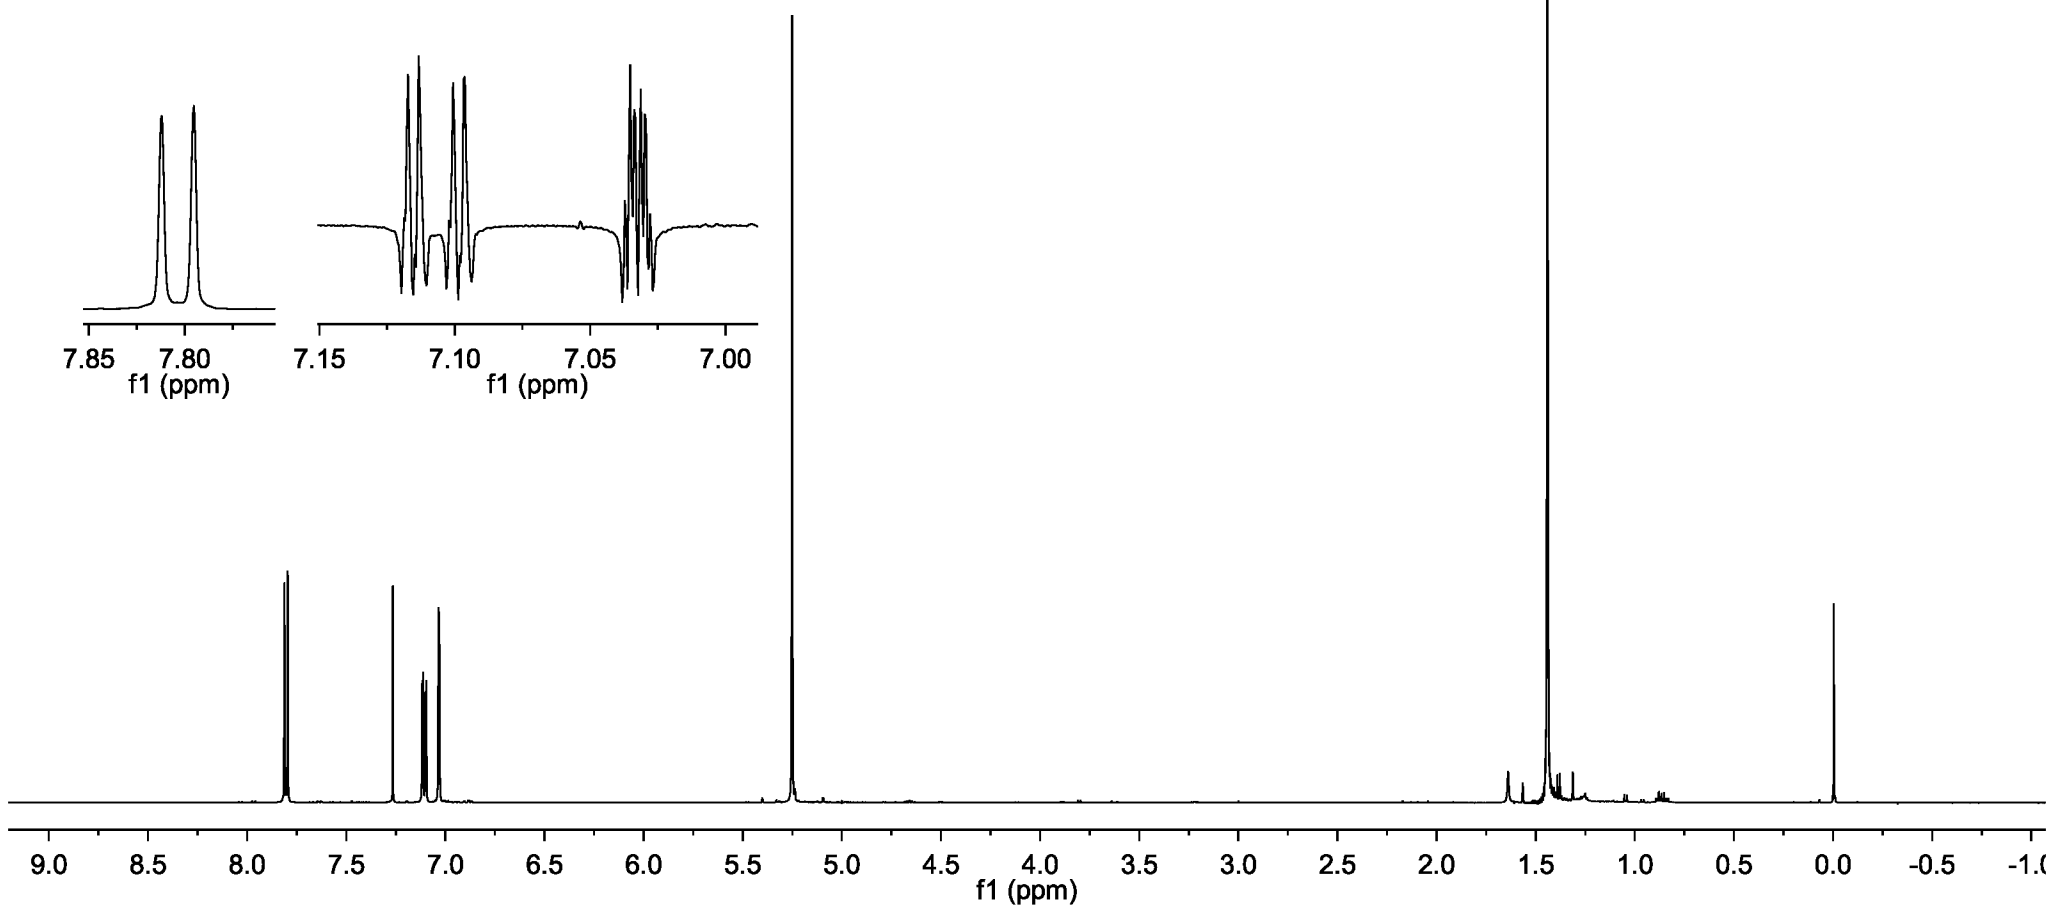



125 MHz, CDCl<sub>3</sub>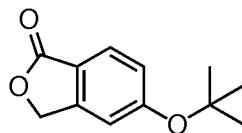**28**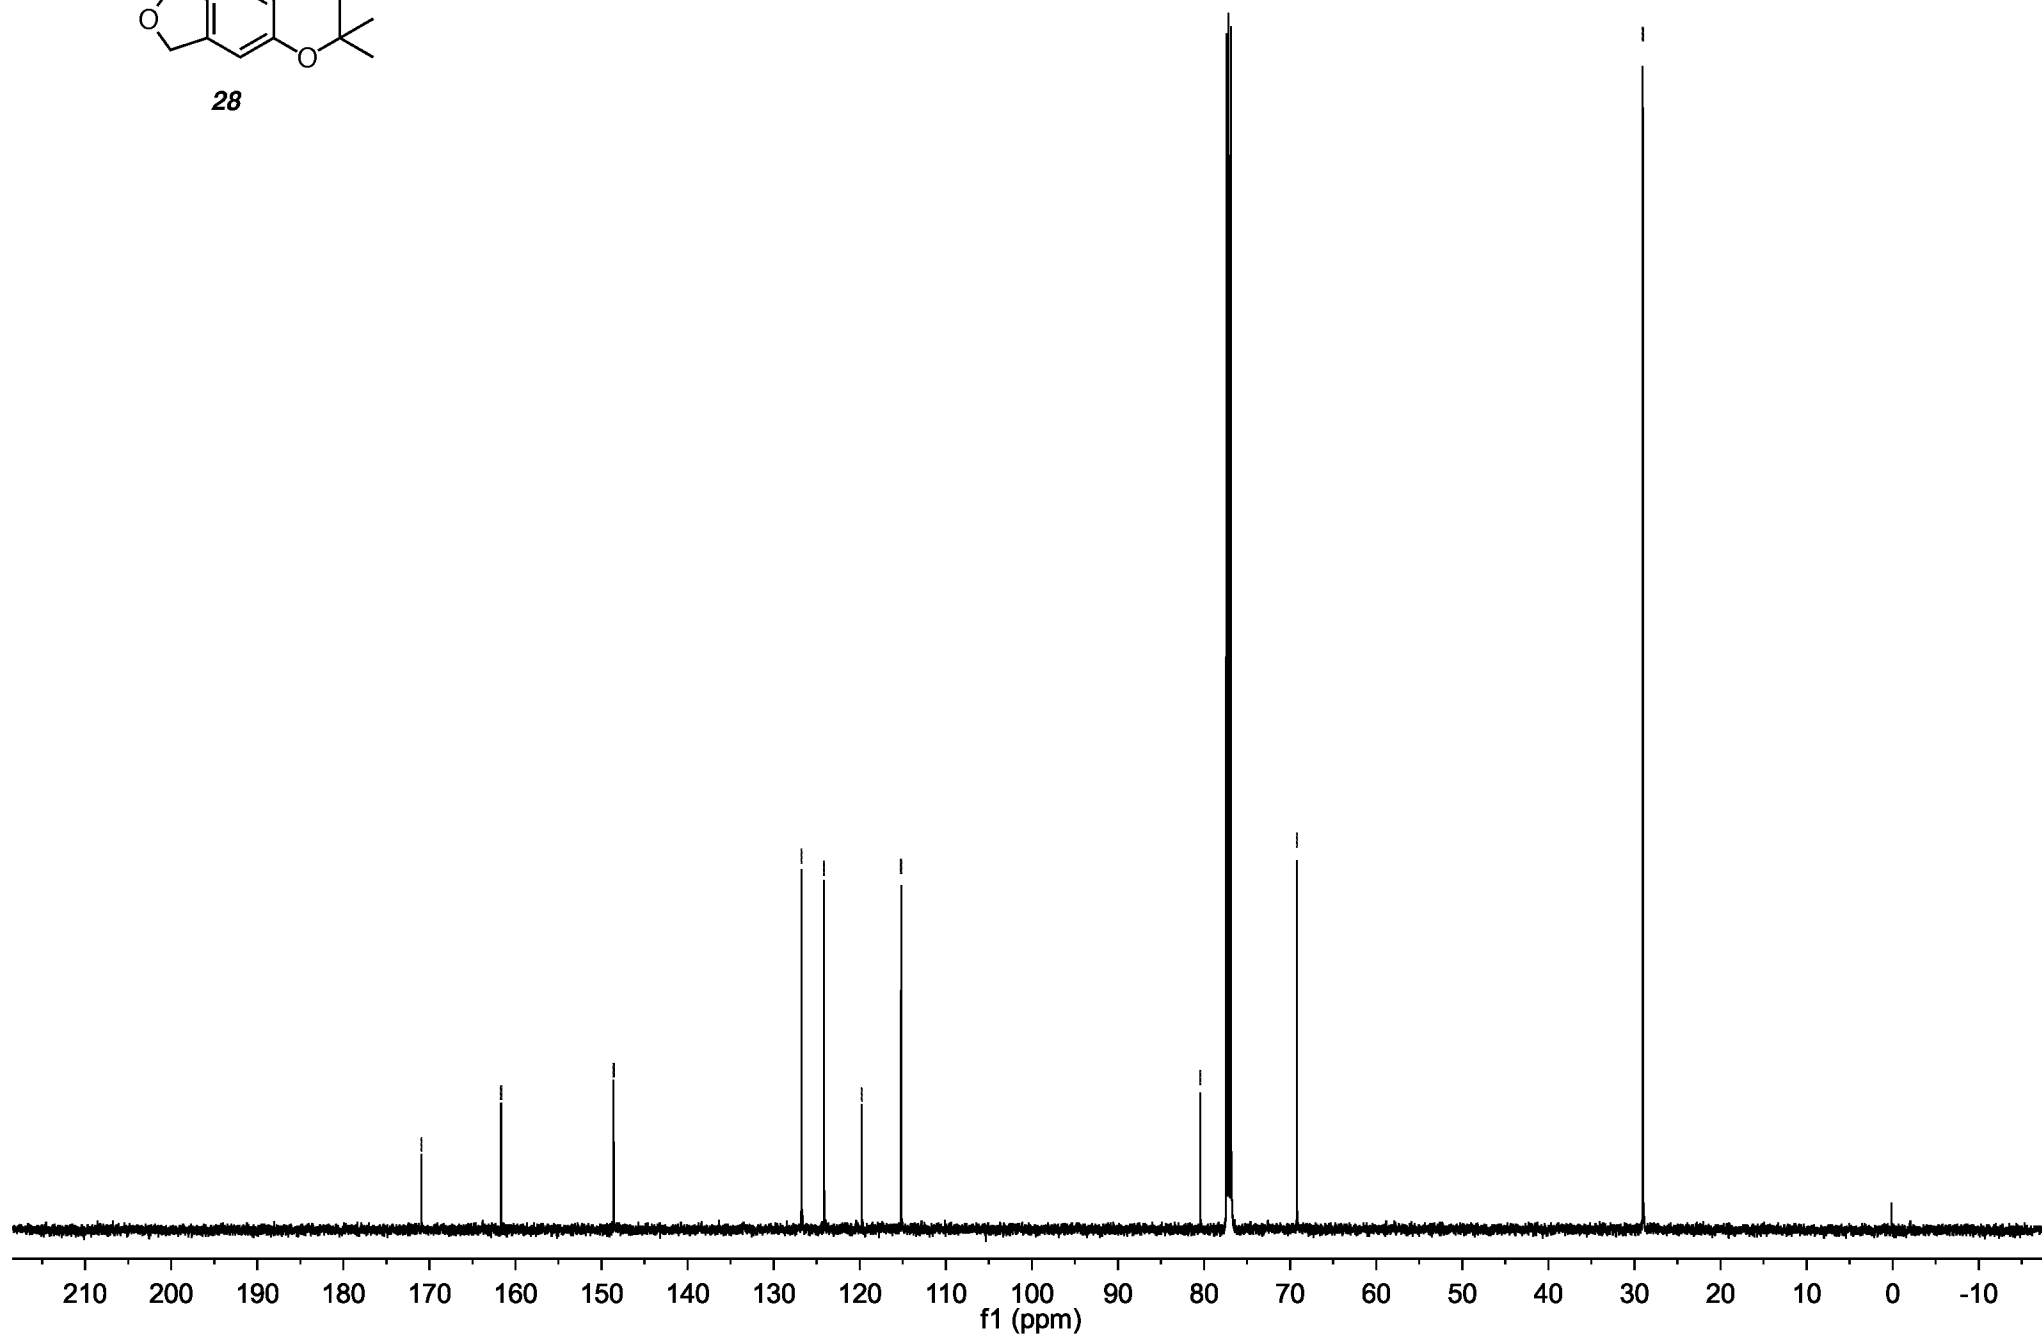

## VI. References for the Supplementary Information

---

- <sup>1</sup> Hoye, T. R., Hanson, P. R. & Vyvyan, J. R. A practical guide to first-order multiplet analysis in <sup>1</sup>H NMR spectroscopy. *J. Org. Chem.* **59**, 4096–4103 (1994).
- <sup>2</sup> Hoye, T. R. & Zhao, H. A method for easily determining coupling constant values: An addendum to “A practical guide to first-order multiplet analysis in <sup>1</sup>H NMR spectroscopy”. *J. Org. Chem.* **67**, 4014–4016 (2002).
- <sup>3</sup> Kende, A. S. & Smith, C. A. A mild synthesis of 1,3-diynes. *J. Org. Chem.* **53**, 2655–2657 (1988).
- <sup>4</sup> Larsson, R., Sterner, O. & Johansson, M. Biomimetic synthesis toward the transtaganolides/basiliolides. *Org. Lett.* **11**, 657–660 (2009).
- <sup>5</sup> Reber, S. Y., Knöpfel, T. F. & Carreira, E. M. Enantioselective total synthesis of (*R*)-strongyloidiols A and B. *Tetrahedron* **59**, 6813–6817 (2003).
- <sup>6</sup> Tang, J.-M., Bhunia, S., Sohel, S. M. A., Lin, M.-Y., Liao, H.-Y., Datta, S., Das, A. & Liu, R.-S. The skeletal rearrangement of gold- and platinum-catalyzed cycloisomerization of *cis*-4,6-dien-1-yn-3-ols: Pinacol rearrangement and formation of bicyclo[4.1.0]heptenone and reorganized styrene derivatives. *J. Am. Chem. Soc.* **129**, 15677–15683 (2007).
- <sup>7</sup> Villeneuve, K., Riddell, N., Jordan, R. W., Tsui, G. C. & Tam, W. Ruthenium-catalyzed [2 + 2] cycloadditions between bicyclic alkenes and alkynyl halides. *Org. Lett.* **6**, 4543–4546 (2004).
- <sup>8</sup> Trost, B. M., Machacek, M. & Schnaderbeck, M. J. A regioselective Ru-catalyzed alkene–alkyne coupling. *Org. Lett.* **2**, 1761–1764 (2000).
- <sup>9</sup> Oppolzer, W., Pimm, A., Stammen, B. & Hume, W. E. Palladium-catalysed intramolecular cyclisations of olefinic propargylic carbonates and application to the diastereoselective synthesis of enantiomerically pure (–)- $\alpha$ -thujone. *Helv. Chim. Acta.* **80**, 623–639 (1997).
- <sup>10</sup> Montierth, J. M., DeMario, D. R., Kurth, M. J. & Schore, N. E. The polymer-supported Cadiot-Chodkiewicz coupling of acetylenes to produce unsymmetrical diynes. *Tetrahedron* **54**, 11741–11748 (1998).
- <sup>11</sup> Yanada, R., Obika, S., Kobayashi, Y., Inokuma, T., Oyama, M., Yanada, K. & Takemoto, Y. Stereoselective synthesis of 3-alkylideneoxindoles using tandem indium-mediated carbometallation and palladium-catalyzed cross-coupling reactions. *Adv. Synth. Catal.* **347**, 1632–1642 (2005).
- <sup>12</sup> Severa, L., Vávra, J., Kohoutová, A., Čížková, M., Šálová, T., Hývl, J., Saman, D., Pohl, R., Adriaenssens, L. & Teplý, F. Air-tolerant C–C bond formation via organometallic ruthenium catalysis: Diverse catalytic pathways involving (C<sub>5</sub>Me<sub>5</sub>)Ru or (C<sub>5</sub>H<sub>5</sub>)Ru are robust to molecular oxygen. *Tetrahedron Lett.* **50**, 4526–4528 (2009).
- <sup>13</sup> Iannazzo, L., Kotera, N., Malacria, M., Aubert, C. & Gandon, V. Co(I)- versus Ru(II)-catalyzed [2+2+2] cycloadditions involving alkynyl halides. *J. Organomet. Chem.* **696**, 3906–3908 (2011).

- 
- <sup>14</sup> Biju, A. T., Wurz, N. E. & Glorius, F. *N*-Heterocyclic carbene-catalyzed cascade reaction involving the hydroacylation of unactivated alkynes. *J. Am. Chem. Soc.* **132**, 5970–5971 (2010).
- <sup>15</sup> Suffert, J., Abraham, E., Raeppl, S. & Brückner, R. Synthesis of 5-/10-membered ring analogues of the dienediyne core of neocarzinostatine chromophore by palladium(0)-mediated ring-closure reaction. *Liebigs Ann.* **1996**, 447–456 (1996).
- <sup>16</sup> Nishizawa, M., Yadav, V. K., Skwarczynski, M., Takao, H., Imagawa, H. & Sugihara, T. Mercuric triflate catalyzed hydroxylative carbocyclization of 1,6-enynes. *Org. Lett.* **5**, 1609–1611 (2003).
- <sup>17</sup> White, J. D., Kim, T.-S. & Nambu, M. Absolute configuration and total synthesis of (+)-curacin A, an antiproliferative agent from the cyanobacterium *Lyngbya majuscula*. *J. Am. Chem. Soc.* **119**, 103–111 (1997).
- <sup>18</sup> Simmons, H. E. A cycloaddition reaction of benzyne. *J. Am. Chem. Soc.* **83**, 1657–1662 (1961).
- <sup>19</sup> Hoheisel, T. N. & Frauenrath, H. A convenient Negishi protocol for the synthesis of glycosylated oligo(ethynylene)s. *Org. Lett.* **10**, 4525–4528 (2008).
- <sup>20</sup> Frisch, M. J. *et al.* *Gaussian 09*, revision A.2; Gaussian, Inc.: Wallingform, CT, 2009.
- <sup>21</sup> Zhao, Y. & Truhlar, D. G. The M06 suite of density functionals for main group thermochemistry, thermochemical kinetics, noncovalent interactions, excited states, and transition elements: Two new functionals and systematic testing of four M06-class functionals and 12 other functionals. *Theor. Chem. Acc.* **120**, 215–241 (2008).
- <sup>22</sup> MacroModel, version 9.9, Schrödinger, LLC, New York, NY, 2011.
